# Supplementary material for: Label-Free Mass Spectrometry-Based Quantitative Proteomics Analysis of Serum Proteins During Early Pregnancy in Jennies (Equus asinus)
Source: Front Vet Sci. 2020 Oct 22;7:569587. doi: 10.3389/fvets.2020.569587 (PMC7642908; doi:10.3389/fvets.2020.569587)
Supplement: Supplementary file 2 [file Table_2.xlsx]

## Sheet: peptides
Detailed information of the identified peptides
Sequence	Length	Missed cleavages	Mass	Proteins	Leading razor protein	Start position	End position	Unique (Groups)	Charges	PEP	Score	PSM C1	PSM C2	PSM C3	PSM P1	PSM P2	PSM P3	Intensity	Intensity P1	Intensity P2	Intensity P3	Intensity NP1	Intensity NP2	Intensity NP3
AACAQLSDFLQEYGTQGCQV	20	0	2244.98	F6XSF7	F6XSF7	1731	1750	yes	2;3	1.7755e-21	152.38	2	2	2	2	2	2	1271900000	319090000	310330000	139230000	172450000	237200000	93556000
AACLPLPGYR	10	0	1116.58	F6WA57;K9KEC7	F6WA57	41	50	yes	2	0.017007	84.097	1	1		1	2	1	59077000	15396000	19207000	11486000	7898300	5091300	0
AADETWELFASGK	13	0	1423.66	F6UL68	F6UL68	56	68	yes	2	0.0013839	106.29			1				30806000	0	0	0	0	0	30806000
AAEEQESR	8	0	918.404	F6XSF7	F6XSF7	1464	1471	yes	2	1.4062e-05	143.11		2	1		1	1	257930000	0	35278000	47940000	0	28043000	146670000
AAISGENAGLVR	12	0	1156.62	F6QX36	F6QX36	126	137	yes	2	1.3204e-40	219.54	1	1	1	1	1	1	5044300000	591720000	488320000	1267700000	1493700000	1075700000	127230000
AALGYNILTQEESQSVYDAR	20	0	2227.08	F7CFN5	F7CFN5	114	133	yes	2	2.1971e-15	132.86	1	1		1	1		60629000	15343000	14829000	0	16389000	14068000	0
AALQALR	7	0	741.45	F6XYB5	F6XYB5	61	67	yes	2	0.0016337	142.63	1	1		1	1	1	490890000	103180000	151590000	0	117510000	118600000	0
AANFENHSGR	10	0	1101.5	F6ZSZ5;F6ZT22;F6ZT60	F6ZSZ5	630	639	yes	3	0.016539	60.064	1	1		1		1	22903000	6022500	0	8427800	4827900	3624800	0
AAQLPYDVQHADIDYMDER	19	0	2249.01	F6PUW3	F6PUW3	402	420	yes	3	1.5903e-05	92.307	1	1	1	1	1	1	175060000	31970000	18795000	53770000	31310000	23789000	15429000
AASNFPVDLSDYPK	14	0	1522.73	F6YCW8;F6YE73;F6Z5E1	F6YCW8	1148	1161	yes	2	0.00047119	91.313	1	1	1	1	1	1	158330000	18666000	34193000	28128000	38826000	29189000	9332600
AAVLALWDK	9	0	985.56	P02062;D1MPT0;F6RDD3	P02062	9	17	yes	2	0.023532	94.302	1	1	1	1	1	1	2281700000	509590000	207550000	378130000	449720000	598060000	138630000
AAVLALWDKVNEEEVGGEALGR	22	1	2325.2	P02062;D1MPT0;F6RDD3	P02062	9	30	yes	3	7.9402e-37	180.05	1	1	1	1	1	1	402200000	112000000	57751000	84325000	36471000	72090000	39565000
AAVYHHFISDGVK	13	0	1442.73	F7BTW7;F7E454;F7CJG3	F7BTW7	913	925	yes	2;3;4	0.00021678	108.67	6	2	2	7	5	3	570550000	177020000	118730000	70118000	70332000	105700000	28653000
AAVYHYFISDGVK	13	0	1468.74	F7BLE3	F7BLE3	916	928	yes	2;3	4.4972e-09	156.83	2	2	2	2	2	2	3292400000	789850000	1384700000	413550000	281400000	289670000	133260000
ACCDKPLLQK	10	1	1231.61	F7BAY6;Q5XLE4;P35747	F7BAY6	300	309	no	1;2;3	3.352e-34	211.56	8	6	8	6	9	6	173520000000	30797000000	40297000000	38269000000	35903000000	12787000000	15472000000
ACDRPAPK	8	1	913.444	F6SP74	F6SP74	161	168	yes	2	4.3592e-07	178.3	1	1		1	1	1	573750000	90145000	95180000	143960000	105560000	138900000	0
ACEPGVDYVYK	11	0	1299.58	F7BTW7;F7E454;F7CJG3	F7BTW7	1537	1547	yes	1;2	0.006602	84.213	2	2	1	2	2	2	7494400000	1656300000	1617200000	1173300000	1657400000	1053300000	336780000
ACKPEIAYAYK	11	1	1312.65	F7A692	F7A692	256	266	yes	3	0.0061824	67.385	1	1		1	1	1	919950000	197850000	203890000	135000000	164740000	218460000	0
ADCEDLQK	8	0	977.412	F7BAT4;A0A061DBP6	F7BAT4	540	547	yes	2	0.0088791	120.92	1			1	1	1	201760000	66083000	57529000	53948000	24197000	0	0
ADDKVYPGEQYTYVMHASQEQSPGVEDANCVTR	33	1	3743.65	F6PQ46	F6PQ46	144	176	yes	4	1.0017e-07	53.987	1	1	1	1	1	1	215420000	66803000	49378000	30592000	29785000	30073000	8789400
ADFAEVSK	8	0	865.418	F7BAY6;Q5XLE4;P35747	F7BAY6	249	256	no	1;2	0.0039724	129.55	7	9	5	9	9	8	117170000000	23812000000	21355000000	23785000000	17799000000	21465000000	8954500000
ADFAEVSKIVTDLTK	15	1	1635.87	F7BAY6;Q5XLE4;P35747	F7BAY6	249	263	no	2;3	5.646e-54	244.72	2	2	2	2	1	2	500930000	125750000	24299000	83712000	108010000	106940000	52223000
ADFSGMSMDR	10	0	1115.44	F6VP61;B8K249	F6VP61	320	329	yes	2	0.0051372	98.033					1	1	9923300	0	5371700	4551600	0	0	0
ADFTECCPADDK	12	0	1427.53	F7BAY6;Q5XLE4;P35747	F7BAY6	186	197	no	1;2;3	1.7573e-196	324.55	8	7	13	10	7	10	86128000000	18736000000	17573000000	16127000000	17007000000	16456000000	228720000
ADFTECCPADDKAGCLIPK	19	1	2166.94	F7BAY6;Q5XLE4	F7BAY6	186	204	no	2;3	1.3664e-08	122.46	2	2	1	2	2	2	9739400000	2029700000	2639600000	1747400000	1375300000	1401000000	546430000
ADGQSCLASMMYQEGK	16	0	1774.73	F7CYR1	F7CYR1	275	290	yes	2;3	8.1766e-08	135.08	4	4	4	5	5	4	1467700000	571800000	561380000	56504000	88777000	70746000	118500000
ADIAESQVNK	10	0	1073.54	Q8MJV1;F6QLB5;F6UP52;F6Q903;Q8MJU9;F6YJN7;F6WS68;F6WZ86;Q8MJV0;F6R839;F6SUC3	Q8MJV0	1913	1922	no	2	0.01376	87.639					1		26690000	0	26690000	0	0	0	0
ADIALLK	7	0	742.459	F6USP9;P80010	F6USP9	671	677	yes	1;2	0.052332	104.11	2	2	1	2	2	2	1805000000	334710000	445280000	343530000	351090000	249570000	80860000
ADIGCTPGSGR	11	0	1089.49	F7BLE3;F7BTW7;F7E454;F7CJG3	F7BTW7	621	631	no	2	7.4385e-05	141.02	1	1	2	1	1	1	4465200000	890540000	899750000	903260000	823740000	559130000	388740000
ADLAKYICEHQDSISGK	17	1	1933.92	F7BAY6;P35747	F7BAY6	281	297	no	2;3	0.00097513	65.563	1		1	2			50333000	14560000	0	0	29196000	0	6576700
ADLSYDVGVSALEIPK	16	0	1675.87	F6ZI35	F6ZI35	218	233	yes	2;3	1.7585e-06	112.5	12	13	4	7	15	6	6631900000	1346200000	1379500000	1026500000	1052300000	904710000	922670000
ADLTKYICEHQDSISGK	17	1	1963.93	Q5XLE4	Q5XLE4	281	297	yes	3;4	1.1107e-08	110.12	3	3	2	2	2	3	414920000	75834000	37982000	64547000	114620000	63314000	58621000
ADSVVDLFSYR	11	0	1270.62	F6YCW8;F6YE73;F6Z5E1	F6YCW8	1352	1362	yes	2	1.0263e-59	246.52	1	1	1	1	1	1	155790000	26502000	29961000	21189000	46751000	17824000	13558000
ADVQAHGEGQEFK	13	0	1414.65	F6QX36	F6QX36	525	537	yes	2;3	0.001015	132.59	1	1	2	1	2	2	5402200000	981720000	1408900000	1097400000	975100000	739420000	199730000
AECMLQQAER	10	0	1234.54	F6WA57;K9KEC7	F6WA57	335	344	yes	2	5.4381e-08	164.57	1	1	1	2	1	1	54069000	19633000	9503200	15168000	0	6705900	3059300
AEEEHLGVLGPQLHADVGDK	20	0	2113.04	F6PQ46	F6PQ46	800	819	yes	3;4	9.3075e-06	84.249	3	2	2	4	2	2	251510000	55616000	28956000	25892000	32973000	66794000	41275000
AEGISEFYDYDVALIK	16	0	1831.89	F6RMD0;K9KBR1	F6RMD0	566	581	yes	2	1.3781e-05	98.105	1	1		1	1	1	700400000	139420000	106610000	113550000	193370000	147450000	0
AEGWSPAVPCLR	12	0	1341.65	F6ZR63;F6U1J0	F6ZR63	376	387	no	2;3	4.385e-08	155.84	2	1	2	2	2	2	1254100000	290070000	334390000	218890000	243870000	109060000	57762000
AEHPFIVEEFVLPK	14	0	1653.88	F6RI47;F6R942	F6RI47	215	228	yes	2;3;4	1.2481e-09	130.1	9	8	12	11	10	9	40633000000	7255500000	7318300000	6390200000	8352000000	6268900000	5048100000
AEIGDEVHVHLK	12	0	1345.7	F6PQ46	F6PQ46	98	109	yes	2;3	0.0011012	72.643	11	13	11	9	14	14	1158400000	223360000	327390000	166440000	316000000	85296000	39871000
AEPLAFTFSHDYK	13	0	1524.72	F6YCW8;F6YE73	F6YCW8	1893	1905	yes	2;3	0.0002009	77.912	2	2	1	2	2	1	182530000	57772000	62414000	12283000	25961000	18670000	5424500
AESAAVYYLVLDVEESDCPVLYK	23	0	2632.26	F6ZI35	F6ZI35	59	81	yes	2;3	1.5061e-36	180.78	4	5	4	5	4	4	497730000	86655000	157290000	93588000	45261000	41136000	73798000
AETFTFHADICTLPEDEK	18	0	2122.95	F7BAY6;Q5XLE4;P35747	F7BAY6	527	544	no	2;3;4	6.4909e-234	331.7	8	5	5	7	7	6	45365000000	7949400000	8004000000	7986300000	7607700000	7543600000	6274000000
AETVQEATFQMELPK	15	0	1720.83	F6R3F4	F6R3F4	60	74	yes	2;3	1.2419e-16	167.6	2	2	1	2	2	3	457610000	84343000	86330000	146570000	85902000	30898000	23567000
AEVQDALQK	9	0	1000.52	F6XSF7	F6XSF7	323	331	yes	2	1.9929e-14	185.55	1	1	1	1	1	1	363670000	68470000	56593000	53056000	53383000	98453000	33711000
AFGGIPNLTK	10	0	1016.57	F6QFD9	F6QFD9	68	77	yes	2	0.0082506	93.649	1	1	1	1	1	1	134260000	34661000	33814000	17792000	25216000	17648000	5125700
AFLEVNEEGSEAAASTAVVIAGR	23	0	2290.14	F7CYR1	F7CYR1	404	426	yes	2;3	8.7783e-25	166.6	16	12	4	16	14	16	917810000	183740000	179710000	171730000	209260000	124510000	48863000
AFLFQDTPR	9	0	1093.56	F6Q4N3	F6Q4N3	60	68	yes	2	0.00041535	136.11	1	1	1	1	1	1	45199000	8873300	9062700	8983400	10005000	5288500	2985700
AFLLTPR	7	0	816.486	F6UEG9	F6UEG9	172	178	yes	2	0.063789	92.692			1				21577000	0	0	0	0	0	21577000
AFQYHSK	7	0	879.424	F6USP9	F6USP9	69	75	yes	2	0.041856	105.39	1	1		2	1	1	679250000	135260000	130970000	116210000	145820000	150990000	0
AGALNSNDAFVLK	13	0	1318.69	Q28372;F7DHZ1;F7E2D1	Q28372	534	546	yes	2	0.00038689	127.4	1	1	1	1	1	1	3535700000	824630000	824230000	761160000	585680000	539070000	905000
AGCLIPK	7	0	757.416	F7BAY6;Q5XLE4	F7BAY6	198	204	no	2	0.041832	105.42	1			1	1	1	34830000000	9751200000	8461900000	8304100000	8313100000	0	0
AGCLIPKLDALK	12	1	1297.74	F7BAY6;Q5XLE4	F7BAY6	198	209	no	2;3	0.0013803	96.143	2	2	1	2	3	3	185480000	51557000	21317000	28525000	41229000	32403000	10443000
AGDFLEAHYNNLR	13	0	1518.72	F7BLE3;F7BTW7;F7E454;F7CJG3	F7BTW7	1171	1183	no	2;3	8.4514e-21	182.65	2	3	3	4	6	2	2137400000	557550000	534790000	259670000	400510000	277340000	107500000
AGEAVAEK	8	0	773.392	F7A692	F7A692	291	298	yes	2	0.0016739	130.27						1	0	0	0	0	0	0	0
AGELEVFNGYFVHFFAPDNMDPIPK	25	0	2853.35	F7DL17;F7CTJ3;F7DAF6	F7DL17	285	309	yes	3	1.623e-05	59.324	1	1	1	1		1	49599000	9962400	0	11419000	5485700	10181000	12550000
AGFAGDDAPR	10	0	975.441	F7AAK7;F7CZ92;F7CW82;F6R1X9;F6Z8K0;P60708	F7CZ92	21	30	no	2	0.00012933	133.86	1	1		1	1	1	753260000	170950000	216200000	160270000	165250000	40589000	0
AGLHCPTPQVIATIR	15	0	1632.88	F6RMK1	F6RMK1	68	82	yes	2;3	2.5924e-08	137.39	2	2	2	2	2	2	619330000	179750000	215250000	112630000	36199000	50154000	25345000
AGLLGLLEEMR	11	0	1200.65	Q8MJV1;F6QLB5;F6UP52;F6Q903;Q8MJU9;F6YJN7;F6WS68;F6WZ86;Q8MJV0;F6R839	Q8MJV0	770	780	no	2	9.0854e-09	163.69					1		36384000	0	36384000	0	0	0	0
AGLQAFFQVQDCNKPSSEDDIR	22	1	2524.17	F6PQ46	F6PQ46	345	366	yes	2;3	1.0574e-23	183	2	2	1	1	4	2	1239600000	260510000	188560000	180330000	211400000	245710000	153050000
AGYYFDGISR	10	0	1147.53	F7ABC9	F7ABC9	367	376	yes	2	0.003492	103.87	1	1	1	1	1	1	123730000	27300000	35911000	20268000	19819000	13957000	6478300
AHGDSEYMR	9	0	1064.43	F7A692	F7A692	97	105	yes	2;3	0.0032468	119.41	2	2		2	2	2	666880000	126510000	189510000	119770000	135580000	95510000	0
AHPALEDLR	9	0	1020.54	F6Z2L5	F6Z2L5	230	238	yes	2	0.00041912	139.68	3	2	1	2	2	3	16819000000	3056800000	3302500000	2454000000	4082900000	3074300000	848570000
AHSCPSVWR	9	0	1098.5	F6Z352	F6Z352	636	644	yes	2;3	0.00062057	119.17	2	2		4	2		110620000	33834000	32541000	0	27372000	16876000	0
AHVDIQLR	8	0	950.53	F7C0D9;F7C0Z0	F7C0D9	235	242	yes	2	0.00046223	153.73	2	2		2	2	1	642460000	163160000	193200000	65755000	134110000	86235000	0
AHVSFKPTVAQQR	13	1	1467.79	F7DL17;F7CTJ3;F7DAF6	F7DL17	247	259	yes	2;3;4	1.8592e-19	182.71	3	3	3	4	7	3	4176600000	597800000	554920000	940120000	914840000	1126900000	41987000
AHVTHHPISDHEVTLR	16	0	1847.94	F7BSX5	F7BSX5	211	226	yes	3;4;5	1.0207e-06	121.99	4		5	9	9	2	668650000	303730000	164670000	74472000	101350000	0	24427000
AHYDLR	6	0	773.382	F7C450	F7C450	303	308	yes	2	0.031027	126.04	1	1	1	1	2	1	11193000000	1550500000	3037100000	1522000000	2651300000	2180100000	251880000
AIADNEADAVTLDAGLVFEAGLSPYNLK	28	0	2876.44	F6ZEH8;P27425	P27425	67	94	no	3	2.0605e-25	133.29	1	1		1	1	1	97284000	16761000	17623000	25907000	14242000	22751000	0
AIADNEADAVTLDAGLVFEAGLSPYNLKPVVAEFYGSK	38	1	3953.99	F6ZEH8;P27425	P27425	67	104	no	3;4	3.2416e-80	178.34	6	6	9	7	7	8	667870000	114630000	143290000	140840000	79088000	106280000	83737000
AIEDDCSQYDPIPGSER	17	0	1950.83	F7CFN5	F7CFN5	97	113	yes	2;3	1.1685e-09	130.1	1	1	2	1	1	1	243150000	51553000	51732000	36323000	50241000	38964000	14333000
AIEDYINEFSVR	12	0	1454.7	P48770;F6UFT2	P48770	497	508	yes	2	1.1938e-30	205.09	1	1		1	1	1	768580000	198680000	172730000	124160000	157360000	115650000	0
AIGYLNAGYQR	11	0	1224.63	F6QAD8;F6R6K3;F6R7S3	F6QAD8	999	1009	yes	2	3.5417e-09	200.1	1	1	1	1	1	1	569960000	95401000	119390000	121890000	84706000	118130000	30442000
AISHLISGYQR	11	0	1243.67	F6REX3	F6REX3	1013	1023	yes	2;3	0.0001117	130.98	1	1	2	1	1	1	912360000	169910000	141120000	219520000	187600000	137460000	56746000
AITDAAMMAEELKK	14	1	1520.76	Q8MJV1;F6QLB5;F6UP52;F6Q903;Q8MJU9;F6YJN7;F6WS68;F6WZ86;F6X267;Q8MJV0;F6R839;F6SUC3	Q8MJV0	1761	1774	no	3	0.017435	50.155					1		17477000	0	17477000	0	0	0	0
AIYEAVLR	8	0	933.528	F6Y2H3;F6Y2V7	F6Y2H3	303	310	yes	2	0.01842	114.02						1	0	0	0	0	0	0	0
AKAPELQAQAK	11	1	1153.65	F6RM73	F6RM73	52	62	yes	2;3	0.0013064	138.06	2	2	2	2	2	2	5372400000	1063100000	1158700000	960420000	755120000	1162100000	272960000
AKDPEHTLFGSVTR	14	1	1556.79	F7BQD6	F7BQD6	376	389	yes	3;4	0.0002802	104.55	2	2		2	2	2	272000000	58106000	56745000	53257000	59361000	44530000	0
ALANSLACQGK	11	0	1131.57	F6SX98	F6SX98	349	359	yes	2	0.0025007	111.95	1			1	1		28737000	0	20985000	0	7752100	0	0
ALCCHLSYK	9	0	1150.53	F6Z129	F6Z129	363	371	yes	2;3	0.0010549	129.55	2	3	2	2	2	1	339270000	62560000	66969000	38893000	79366000	74832000	16648000
ALCPKPQIEHGR	12	1	1404.73	F7BNQ2	F7BNQ2	487	498	yes	2;4	0.00040281	103.91	2	2	1	1	1	1	434840000	135110000	82565000	77240000	31728000	101220000	6971700
ALCTHFQGSVATPR	14	0	1543.76	F7CI62;Q1WDE9	F7CI62	152	165	yes	2;3	8.5485e-07	116.9	2	2	2	2	2	2	466850000	210420000	101450000	45560000	50257000	47632000	11538000
ALDMEDFK	8	0	967.432	F7DL17;F7CTJ3;F7DAF6	F7DL17	159	166	yes	2	0.0061463	125.25	1	1	1		1	1	776010000	0	215520000	175910000	162430000	156040000	66118000
ALDQYLMEFNACR	13	0	1629.73	F7CFN5	F7CFN5	450	462	yes	2;3	6.0471e-87	258.52	1	2	1	2	2	1	277730000	68355000	56885000	39449000	44932000	49552000	18561000
ALDVMVSTFHK	11	0	1246.64	F6UF75	F6UF75	8	18	yes	3	0.0083702	46.955				1			12272000	12272000	0	0	0	0	0
ALEESNYELEGK	12	0	1380.64	F6SJK9;F6SQQ0;F6WDW3;F6SS14	F6SJK9	56	67	yes	2	0.015219	82.749	1	1		1	1	1	185350000	31507000	17539000	12250000	104030000	20020000	0
ALEFLHLQDGSVNYK	15	0	1732.88	F7A8N4	F7A8N4	36	50	yes	2;3	7.4602e-05	84.507	2	2		2	1	2	125920000	24789000	14903000	31150000	22828000	32255000	0
ALEGVFQK	8	0	890.486	F7DU87;Q0PMN3	F7DU87	50	57	yes	2	0.023388	108.24	1	1		1	1	1	633450000	52624000	51317000	33088000	161790000	334630000	0
ALFVSELSK	9	0	992.554	F6RMD0;K9KBR1	F6RMD0	630	638	yes	2	0.0011829	128.61	1	1		1	1	1	2072900000	431410000	389150000	423620000	474180000	354510000	0
ALLAYAFALAGNQAK	15	0	1520.84	F6REX3	F6REX3	1156	1170	yes	2	0.0044211	60.518				1			3936600	3936600	0	0	0	0	0
ALLAYAFALAGNQDK	15	0	1564.82	F6RI47;F6R942	F6RI47	1152	1166	yes	2;3	3.9006e-68	225.93	2	2	2	2	2	2	1749000000	537760000	390520000	219550000	246800000	222060000	132330000
ALNHLPLEYNSALYSR	16	0	1859.95	F6YQL3	F6YQL3	341	356	yes	2;3	6.9611e-06	61.265	1	2	1	1	2	2	112690000	23766000	34071000	20464000	11870000	17832000	4690800
ALPAPVER	8	0	851.486	H9GZU8;H9GZT5;H9GZU9	H9GZU8	202	209	no	2	0.0011461	143.02	1	1	1	1	1	1	12784000000	2294400000	4336400000	1243500000	2125600000	1873000000	911080000
ALPFWNEEIVPQIK	14	0	1682.9	K9KE19;F7DQS6	K9KE19	72	85	yes	2	0.0007556	82.417	1	1		1	1	1	50390000	11319000	14707000	9442900	8660100	6260800	0
ALQEYR	6	0	778.397	Q29482	Q29482	438	443	yes	2	0.031027	121.87	1	1	1	1	1	1	3876200000	742510000	816240000	757890000	756070000	719230000	84223000
ALVEGVDQLLADYQIK	16	0	1773.95	F7A692	F7A692	145	160	yes	2;3	2.957e-43	197.43	2	2	2	2	2	2	1034800000	223860000	215000000	160640000	187660000	160060000	87570000
ALVQQVEELR	10	0	1183.66	F6RZ27	F6RZ27	317	326	yes	2	2.1139e-17	187.78	1	1	1	1	1	1	763050000	132010000	127870000	188030000	154580000	109110000	51441000
ALWSGAVTPGR	11	0	1113.59	F6VJR6	F6VJR6	411	421	yes	2;3	0.00035737	151.44	2	3	1	2	2	3	21812000000	4102700000	5186100000	3537700000	4415300000	3899500000	671020000
ALYHQYTDGSFTTILEK	17	0	1985.97	F6PQ46	F6PQ46	69	85	yes	2;3	2.9395e-10	100.19	1	1	1	2	2	1	120770000	36037000	31235000	14514000	11070000	14216000	13693000
ALYSQAR	7	0	807.424	F7DL17;F7CTJ3;F7DAF6	F7DL17	140	146	yes	2	0.0093681	132.94	1	1		1	1	1	514880000	67409000	70352000	136720000	53877000	186520000	0
ALYWVDGR	8	0	978.492	F6YCW8;F6YE73;F6Z5E1	F6YCW8	677	684	yes	2	0.014227	116.3	1	1		1	1	1	246080000	46387000	60366000	47554000	55575000	36196000	0
AMEAVAAQGK	10	0	974.486	K9KE19;F7DQS6;F7A616	K9KE19	151	160	yes	2	0.035008	66.457	1						9648800	0	0	0	9648800	0	0
AMELLQEEDLMDEDDIAVR	19	0	2234.01	F6XSF7	F6XSF7	763	781	yes	2	5.4778e-22	166.38	1	1		1	1		57474000	17126000	15760000	0	13089000	11499000	0
AMQGGLVGK	9	0	859.459	F6XSF7	F6XSF7	1133	1141	yes	2	0.048867	62.717	1			1		1	46263000	16139000	0	13099000	17024000	0	0
ANALCLSK	8	0	875.453	F6REX3	F6REX3	776	783	yes	2	0.0039724	129.55	1	1		1	1	1	644370000	169920000	125020000	143140000	98519000	107780000	0
ANGYLGTVTIK	11	0	1135.62	F7BLE3;F7BTW7;F7E454;F7CJG3	F7BTW7	79	89	no	2	0.0032372	103.7	1	2		1	1	1	1879200000	497850000	610380000	227850000	330540000	212540000	0
ANLFNK	6	0	705.381	F6YCW8;F6YE73;F6Z5E1	F6YCW8	304	309	yes	2	0.060592	102.12	1	1		1	1	1	276430000	77456000	67210000	44688000	39470000	47604000	0
ANLPLVTNEECQK	13	0	1514.74	F6PR90	F6PR90	538	550	yes	2	1.9889e-08	147.73	1	1	1	1	1	1	183680000	51045000	43562000	18012000	37803000	23257000	10004000
ANNNQQWLQIDLLK	14	0	1696.89	F7DZ01	F7DZ01	1368	1381	yes	2	0.00050821	84.198	1	1		1		1	60773000	26404000	0	9800400	12964000	11604000	0
ANRPFLVLIR	10	1	1197.73	F7CYR1	F7CYR1	437	446	yes	3	0.015738	79.986	1	1		1	1	1	83071000	20306000	25219000	9332600	15333000	12881000	0
APDVFPLTICGNTPDPK	17	0	1840.9	H9GZU9	H9GZU9	5	21	yes	2;3	3.064e-08	134.56	2	2	3	2	2	2	28224000000	3443100000	10142000000	5322700000	3457400000	3163300000	2695500000
APEALFQPSFLGMESSGIHETTFNSIMK	28	0	3068.46	F6T3Y8	F6T3Y8	247	274	yes	3	2.8626e-12	102.05	1	1		1	1	1	125820000	35442000	31312000	19247000	20462000	19352000	0
APEELTVVLGQDR	13	0	1425.75	F7DGR1	F7DGR1	416	428	yes	2;3	3.5637e-09	157.38	2	2	2	2	2	2	296910000	62906000	76512000	46975000	52156000	38682000	19675000
APELQAQAK	9	0	954.513	F6RM73	F6RM73	54	62	yes	2	0.00013741	155.88	1	1	1	2	1	2	26354000000	4488600000	5417100000	5840000000	5754500000	4112000000	742060000
APENLR	6	0	698.371	F6XSF7	F6XSF7	1211	1216	yes	2	0.031106	126.07	2	1		1	1	1	2288700000	312170000	696110000	417130000	558640000	304600000	0
APGGGGIVWGK	11	0	997.535	F6PUW3	F6PUW3	1345	1355	yes	2	0.016514	74.301				1		1	42924000	24881000	0	18044000	0	0	0
APQVSTPTLVEIGR	14	0	1466.81	F7BAY6;Q5XLE4;P35747	F7BAY6	438	451	no	2;3	2.3841e-29	218.11	4	4	3	5	5	3	61074000000	10484000000	9957600000	12534000000	11646000000	9813800000	6638800000
APTPEQTHR	9	0	1035.51	F6X449	F6X449	73	81	yes	2	0.020241	95.815	1				1	1	135500000	0	26916000	60275000	48313000	0	0
APVEHFHQPR	10	0	1216.61	F6RI47;F6R942	F6RI47	1195	1204	yes	2;3	2.7569e-25	206.16	3	3	4	3	4	2	24997000000	6669500000	7227800000	3728200000	4627600000	2130900000	613110000
APWMEQEGPEYWER	14	0	1806.77	F7BSX5;F2VYZ0;F2VYZ1;Q30482;Q0R0C0;B2X062	F7BSX5	73	86	no	2	0.00055223	131.82	2	3	2	3	2	3	1196900000	165230000	171990000	170820000	154570000	425070000	109220000
APWVEQEGPEYWER	14	0	1774.8	C9K796	C9K796	73	86	no	2;3	2.9813e-59	223.14	2	2	2	2	2	2	1728600000	485250000	257210000	300050000	356450000	114000000	215660000
AQFILHDQACVK	12	0	1428.72	F7BTW7;F7E454;F7CJG3	F7BTW7	710	721	yes	2;3	0.0020372	133.81	4	4	4	3	3	3	573060000	64042000	126560000	60450000	202030000	104020000	15965000
AQGSLPEVSNHASILIMLTDGEPTEGVTDR	30	0	3136.53	F6QX36	F6QX36	384	413	yes	3	1.6165e-12	86.304			1	1	1	1	86724000	7961800	17432000	22108000	0	0	39222000
AQINQNVEELK	11	0	1284.67	F6RZ27	F6RZ27	188	198	yes	2	0.00098593	149.72	1	1	1	1	1	1	1272700000	238940000	322960000	201270000	207590000	217640000	84281000
AQLVPLPVSVHVEFAVAATDCVAK	24	0	2520.34	F7C450	F7C450	187	210	yes	3	1.4939e-10	108.59	2	2	5	2	2	1	210080000	40089000	52641000	35204000	25914000	27195000	29037000
AQLYIDCEK	9	0	1138.53	F6YR34	F6YR34	165	173	yes	2	0.011079	104.44				1			0	0	0	0	0	0	0
AQPVQVAEGSEPDSFWEALGGK	22	0	2301.09	Q28372;F7DHZ1;F7E2D1	Q28372	576	597	yes	2;3	1.8894e-15	167.56	3	3	2	2	3	3	2648000000	680540000	513560000	387920000	431180000	361790000	273010000
AQRPPRPLSPISTIQPK	17	2	1885.09	F6Y0C1	F6Y0C1	22	38	yes	3;4	6.4953e-05	67.605	2	2	1	2	2	1	235670000	59810000	61106000	18246000	46090000	41544000	8870700
AQVSAQAEQLR	11	0	1199.63	F6RZ27	F6RZ27	144	154	yes	2	0.0033414	101.65	1	1	1	1	1	1	408350000	68921000	42417000	83644000	93764000	79313000	40295000
AQVSPPAADMLQMR	14	0	1513.74	F6QXQ3	F6QXQ3	45	58	yes	2	0.00027423	122.51	1			1	1	1	75418000	20539000	19532000	15834000	19514000	0	0
AQVSVFEEGAEPEAMLQVLGPK	22	0	2328.17	Q28372	Q28372	205	226	yes	2	8.9063e-18	135.37	1	1	1	1	1	1	213400000	42254000	51367000	36774000	26645000	42924000	13437000
AQWANPFDPAK	11	0	1243.6	F6ZRF6	F6ZRF6	207	217	yes	2	0.0020145	97.965	1			2	1	1	27140000	1376300	0	17490000	8272800	0	0
AQYEDIAQK	9	0	1064.51	F7B7X0	F7B7X0	353	361	yes	2	0.044706	84.568	1	1		1	1	1	153720000	27213000	16123000	17712000	68919000	23750000	0
AQYEEIAQR	9	0	1106.54	F7D281;F6ZND8;F7AGY4;F7D5X8	F7D281	339	347	yes	2	0.0020774	121.99	1	1	1	1	1	1	153140000	42455000	15545000	15117000	57216000	19619000	3185300
AQYVLISPEAGSR	13	0	1389.73	F7A8N4	F7A8N4	788	800	yes	2	0.014539	93.058		1	1				2656400	0	0	0	0	0	2656400
ARDESLDFFTR	11	1	1355.65	F6YCW8;F6YE73;Q7YQQ6	F6YCW8	3166	3176	yes	2;3	9.3394e-05	145.55	2	2	2	2	2	2	330320000	68300000	76986000	54790000	76463000	43750000	10029000
AREENAVPER	10	1	1169.58	F7AVY0;F7AE68	F7AVY0	376	385	yes	2;3	1.431e-06	163.38	2	2	1	2	1	3	491520000	187880000	62846000	80463000	38896000	112990000	8453900
ASASDGSSFVVAR	13	0	1252.6	F6RMQ1	F6RMQ1	117	129	yes	2	0.022393	57.348						1	0	0	0	0	0	0	0
ASDFQLNQLQGK	12	0	1347.68	F6PKE1	F6PKE1	109	120	yes	2	6.2484e-12	162.88	1	2	1	1	1	1	482830000	110960000	101890000	88062000	75392000	83445000	23089000
ASFLAAIDEASK	12	0	1221.62	F6Z2L5	F6Z2L5	250	261	yes	1;2;3	1.3721e-34	179.72	12	9	13	27	13	11	31117000000	51054000	8261500000	7910200000	8571600000	806400000	5516200000
ASFSVLGDILGSAIK	15	0	1476.82	F6QAD8;F6R6K3;F6R7S3	F6QAD8	941	955	yes	2;3	3.397e-05	113.38	2	2	1	2	2	2	804530000	174400000	180310000	115110000	144930000	122870000	66903000
ASFSVLGDILGSAMR	15	0	1522.78	F6RI47;F6R942	F6RI47	950	964	yes	2;3	2.3931e-55	212.09	2	4	4	4	4	4	3294700000	751070000	363310000	883570000	250850000	802350000	243520000
ASGIPDR	7	0	714.366	A0A0A1E971;A0A0A1E412;A0A0A1E976;A0A0A1E9C4;A0A0A1E4E7;F6PI70;F6R2W0;F6Z4A7;F6WJI6	A0A0A1E971	76	82	no	2	0.0082989	134.06	2	2	1	2	3	3	13931000000	3340200000	4315400000	2529400000	1480200000	2011900000	253950000
ASGTKLPECEAVCGKPK	17	2	1830.9	F6XWM5	F6XWM5	77	93	yes	4	0.0014174	50.079		1	1		1		32397000	0	21526000	0	0	9893100	977860
ASGVPDR	7	0	700.35	A0A0A1E422;A0A0A1E4Z5;A0A0A1E6G2;A0A0A1E543;A0A0A1E981;A0A0A1E6I1;A0A0A1E986;A0A0A1E6M0;A0A0A1E4W7;A0A0A1E487;A0A0A1E430;A0A0A1E470;A0A0A1E6H5;A0A0A1E4N8;A0A0A1E3Z9;A0A0A1E447;A0A0A1E6J8;A0A0A1E6D7;A0A0A1E4T2;A0A0A1E4L2;A0A0A1E406;A0A0A1E966;A0A0A1E955;A0A0A1E6Q6;A0A0A1E6K4;A0A0A1E6E2;A0A0A1E6D2;A0A0A1E556;A0A0A1E532;A0A0A1E4R8;A0A0A1E483;A0A0A1E3Z2;A0A0A1E6H1;A0A0A1E6B2;A0A0A1E6H7;A0A0A1E3Y3;A0A…	A0A0A1E470	76	82	no	2	4.7524e-05	164.89	2	2	2	1	1	2	68260000000	12614000000	12448000000	15235000000	12747000000	10725000000	4491600000
ASGVPNR	7	0	699.366	A0A0A1E6Q0	A0A0A1E6Q0	76	82	yes	2	0.0012795	153.67	2	2		2	1	2	2505100000	593740000	470050000	603040000	424160000	414120000	0
ASHGEVEDLVEK	12	0	1311.63	F7D7M0	F7D7M0	334	345	yes	2;3	0.0028251	86.898	1	2	1		1	2	43614000	0	6977600	15191000	5896200	14670000	879150
ASPEHVVVTR	10	0	1093.59	F6R3F4	F6R3F4	807	816	yes	2;3	0.00045232	108.57	2	2	2	2	2	2	2187100000	466680000	624820000	333110000	470360000	226180000	65917000
ASSIMDELFQDR	12	0	1410.64	Q29482	Q29482	182	193	yes	2;3	6.3794e-12	194.06	4	4	4	4	3	4	3470800000	486330000	715450000	524040000	847830000	571070000	326080000
ASSNEEVMFLTIQVK	15	0	1694.85	F6RI47;F6R942	F6RI47	94	108	yes	2	0.016146	61.353		1	2	1	2	1	295580000	58118000	107970000	63008000	0	44344000	22144000
ASSSAGQQVAR	11	0	1060.53	F7C0I7;F7DMY7	F7C0I7	1912	1922	yes	2	0.0093637	76.827						1	0	0	0	0	0	0	0
ASTATAEQFFQK	12	0	1327.64	F6Q4N3	F6Q4N3	72	83	yes	2	0.0020031	113.66				1	1		59453000	29359000	30094000	0	0	0	0
ASTSSCVYSSGEK	13	0	1361.58	F7BNQ2	F7BNQ2	390	402	yes	2	0.00038553	127.42	1	2	2	1	1	2	2199300000	836470000	257010000	408300000	206880000	390420000	100230000
ATEDEGSEQK	10	0	1092.46	F7CYR1;Q9N1X2	F7CYR1	63	72	yes	2	2.2491e-12	182.53	1	1	1	1	1	1	13354000000	2162100000	2216000000	2533700000	3528900000	2663600000	250110000
ATEDEGSEQKIPEATNR	17	1	1873.87	F7CYR1;Q9N1X2	F7CYR1	63	79	yes	2;3	8.0961e-106	292.49	2	2	1	2	2	2	3734300000	702070000	938450000	496070000	610820000	862860000	124050000
ATFGCHDTYVLDGPEEVECNK	21	0	2440.03	F6Z041	F6Z041	230	250	yes	2;3	2.8679e-57	258.6	5	4	4	4	4	5	9054000000	1729100000	1855000000	1654700000	1847400000	1495300000	472560000
ATFYALSHVVNNYHK	15	0	1762.88	F6YCW8;F6YE73;F6Z5E1	F6YCW8	399	413	yes	3;4	0.0011187	46.408	2	2	1	2	2	2	92371000	31775000	18739000	21675000	7180400	11259000	1742600
ATITGYR	7	0	780.413	F7CN05;F7CN11;F7CS60	F7CN05	1382	1388	yes	2	0.056088	94.777				1	1	1	246130000	68988000	73036000	104110000	0	0	0
ATKEQLK	7	1	816.471	F7BAY6;Q5XLE4;P35747	F7BAY6	562	568	no	2	0.0015305	161.9	1			1			343280000	157820000	0	0	185470000	0	0
ATSFLGTK	8	0	823.444	F6XSF7	F6XSF7	1181	1188	yes	2	0.010901	119.17	1	1	1	2	2	2	1181600000	280700000	262590000	170040000	163870000	235530000	68836000
ATSGTEHQFCGGR	13	0	1406.6	F6WZ69	F6WZ69	150	162	yes	3	0.04048	26.969	1	1		1		1	32614000	7312100	0	8810900	8491500	7999700	0
ATTVTGTR	8	0	805.429	F6USP9;P80010	F6USP9	501	508	yes	2	0.0011419	143.11	1	1		1	1	1	4176500000	774220000	809950000	986810000	839210000	766260000	0
ATVFNYLPK	9	0	1051.57	F6RI47;F6R942	F6RI47	816	824	yes	2	0.039516	86.953	1	1	1		1	1	6391000000	0	1960100000	1171300000	1503300000	1007100000	749190000
ATVIYQGER	9	0	1035.53	F6Z041	F6Z041	271	279	yes	2	0.00021135	153.78	1	1	1	1	1	1	3846200000	656970000	569650000	540190000	1433100000	530790000	115540000
ATVLNYLPK	9	0	1017.59	F6QAD8;F6R6K3;F6R7S3	F6QAD8	807	815	yes	1;2	0.033853	89.55	2	1	1	1	2	1	143500000	21452000	36867000	25851000	29304000	22641000	7385100
ATVQVVAGR	9	0	899.519	F7C0D9;F7C0Z0	F7C0D9	309	317	yes	2	0.0010376	129.68	1	1	1	1	1		273740000	97279000	60044000	0	77082000	23188000	16146000
ATVVCLISDFSPSDLTVSWK	20	0	2224.11	A0A0A1E6Q0;A0A0A1E9B9;A0A0A1E550;A0A0A1E439;A0A0A1E998;A0A0A1E6P5;A0A0A1E3Y7;A0A0A1E4U0;A0A0A1E422;A0A0A1E4Z5;A0A0A1E6G2;A0A0A1E543;A0A0A1E981;A0A0A1E6I1;A0A0A1E986;A0A0A1E6M0;A0A0A1E4W7;A0A0A1E487;A0A0A1E430;A0A0A1E513;F6SP11;A0A0A1E3W4;A0A0A1E921	A0A0A1E6P5	154	173	no	2;3	3.1037e-21	188.4	1		2	2	2	3	4220000000	509630000	3541900000	0	0	0	168470000
ATYGELADCCEK	12	0	1415.57	F7BAY6;Q5XLE4;P35747	F7BAY6	106	117	no	2;3	7.407e-12	161.17	13	7	9	7	10	11	111950000000	20218000000	21893000000	21511000000	19894000000	16088000000	12349000000
ATYGELADCCEKQEPER	17	1	2054.87	F7BAY6;Q5XLE4;P35747	F7BAY6	106	122	no	3	4.9305e-05	72.11		1		1			18515000	0	0	0	0	18515000	0
AVADFLR	7	0	790.434	F6PSH3	F6PSH3	291	297	yes	2	0.019708	122.15	1	2	2	1	1	1	400480000	116130000	108080000	32425000	77861000	45459000	20523000
AVDQSVLLMK	10	0	1102.61	F6RI47;F6R942;F6QAD8;F6R6K3;F6R7S3	F6RI47	599	608	no	2	0.014109	103.83	1	1	1			1	78902000	0	0	18151000	33976000	16827000	9947400
AVDQSVLLMKPEAELSPASVYSLLPVK	27	1	2883.57	F6RI47;F6R942	F6RI47	599	625	yes	2;3;4	1.8172e-44	189.84	9	9	10	6	7	9	21039000000	1314600000	1406900000	5207100000	6013800000	3936400000	3159800000
AVDTALK	7	0	716.407	F7C0D9;F7C0Z0	F7C0D9	35	41	yes	2	0.0095822	132.72	1	1		1	1	1	1687700000	227130000	342890000	264270000	349480000	503930000	0
AVEIIPK	7	0	768.475	Q28372;F7DHZ1;F7E2D1	Q28372	527	533	yes	2	0.046384	100.07	1	1		1	1	1	1537200000	374780000	357450000	263390000	286360000	255190000	0
AVEPQLQEEER	11	0	1326.64	F7CR03	F7CR03	252	262	yes	2	0.0010797	127.3	1	2	1	1	2	2	81719000	12796000	20273000	15946000	12805000	12967000	6932000
AVFPSIVGR	9	0	944.544	F6T3Y8;F7AAK7;F7CZ92;F7CW82;F6R1X9;F6Z8K0;P60708	F7CZ92	31	39	no	2	5.9609e-05	158.08	1	1	1	1	1	1	373260000	68233000	111510000	82458000	59266000	45227000	6571900
AVGALYDHVNK	11	0	1185.61	F6YCW8;F6YE73	F6YCW8	4029	4039	yes	2	0.014619	76.17	1	1			1	1	59820000	0	20550000	13012000	14502000	11756000	0
AVISSGFDVFAK	12	0	1239.65	F6PPQ0	F6PPQ0	532	543	yes	2	0.022254	60.064	1	1			1	1	50398000	0	10747000	10556000	12052000	17042000	0
AVLFTYDQYQDK	12	0	1489.71	F7DZE7;A0A3B0IP77	F7DZE7	176	187	yes	2	4.772e-05	140.75	1	1	1	1	1	1	1002000000	143490000	189250000	179850000	203840000	240170000	45455000
AVLTIDEK	8	0	887.496	B5BV04;B5BV07;B5BV11;B5BV10;B5BV06;B5BV13;B5BV09;B5BV08;B5BV12;F7BF31;F7CSL8;F7CYP1;F7DXM5	B5BV07	363	370	no	1;2	3.6556e-05	171.38	3	4	1	4	5	4	31674000000	7092600000	6149500000	5464700000	6944000000	5323000000	700130000
AVLYNYR	7	0	897.471	F7BLE3;F7BTW7;F7E454;F7CJG3	F7BTW7	848	854	no	2	0.0068104	137.2	1	1	1	1	1	1	2898000000	612950000	474800000	446710000	510490000	735980000	117020000
AVRPGYPK	8	1	886.502	F6V881	F6V881	184	191	yes	2	0.019915	148.07	1	1		1	1	1	888500000	171350000	215410000	162130000	153080000	186520000	0
AVSASDSEK	9	0	892.414	F6R3F4	F6R3F4	559	567	yes	2	0.00051053	133.58	1	1	1	1	1	1	4262000000	740240000	763780000	999520000	768050000	757390000	233020000
AVSNFFAGSCVPCADR	16	0	1756.77	P27425	P27425	165	180	yes	2;3	1.5829e-12	137.95	2	2	2	3	5	3	32753000000	5636300000	7219800000	5571700000	6787800000	5213600000	2324300000
AVSSLVQR	8	0	858.492	F7DU87;Q0PMN3	F7DU87	207	214	yes	2	0.01598	114.78	1	1		1	1	1	871410000	115980000	131560000	66430000	312250000	245190000	0
AWEDTLDR	8	0	1004.46	F6QYS3	F6QYS3	366	373	yes	2	0.0013217	139.31	1	1		1	1	1	402020000	65865000	63663000	115420000	96579000	60491000	0
AWLHSSK	7	0	827.429	F6RFD7	F6RFD7	99	105	yes	2	0.04859	97.473						1	71344000	0	0	71344000	0	0	0
AYISIHSYSQK	11	0	1295.65	F6PSH3	F6PSH3	305	315	yes	2;3	0.0027279	77.677				2	1		20069000	0	20069000	0	0	0	0
AYLEEECPGMLR	12	0	1466.65	F7CAB8	F7CAB8	180	191	yes	2;3	3.0092e-16	172.47	3	2	2	3	3	2	1715200000	459420000	427360000	245300000	310070000	229440000	43625000
AYTAFPDFFR	10	0	1233.58	F6PUW3	F6PUW3	1380	1389	yes	2	5.8907e-34	209.87	1	1	1	1	1	1	127070000	39222000	24579000	23721000	20806000	15974000	2762800
AYYHLLEQVAPK	12	0	1430.76	F6WA57;K9KEC7	F6WA57	299	310	yes	2;3	0.0017005	93.111	1	2	1	2	2	1	94448000	32048000	26046000	15970000	0	17870000	2514200
CAADESAENCDK	12	0	1368.49	F7BAY6;Q5XLE4;P35747	F7BAY6	77	88	no	1;2;3	0	417.24	11	10	9	13	10	11	91446000000	1613800000	18700000000	20752000000	22237000000	19155000000	8988400000
CAADESAENCDKSLHTLFGDK	21	1	2367.01	F7BAY6;Q5XLE4;P35747	F7BAY6	77	97	no	3	0.011487	37.379		1	1	1			24026000	10437000	0	0	0	11075000	2513800
CAAPLGGVDFQLR	13	0	1402.7	F6VJR6	F6VJR6	235	247	yes	2;3	2.5275e-28	188.04	3	3	3	3	3	4	9361900000	1734800000	1997300000	1451800000	1528600000	1713300000	936160000
CACSNHEPYFGYSGAFK	17	0	1993.81	F6ZEH8;P27425	P27425	198	214	no	2;3	1.2105e-62	220.53	5	7	5	5	8	7	15873000000	3759500000	4517600000	2872700000	1749600000	1848400000	1125100000
CACSSQEPYFGYSGAFK	17	0	1957.8	F6PKE1	F6PKE1	189	205	no	2;3	1.5609e-06	85.288	2	2	2	2	2	2	397380000	90751000	110420000	67883000	62907000	55137000	10281000
CAEESCFMHQADDEVTLDDR	20	0	2426.94	F7BTW7;F7E454;F7CJG3	F7BTW7	1514	1533	yes	2;3	8.3064e-37	164.33	2	2	2	2	2	2	1903800000	280710000	445590000	538720000	291490000	305100000	42184000
CAEESCFMHQADDEVTLDDRLDK	23	1	2783.15	F7BTW7;F7E454;F7CJG3	F7BTW7	1514	1536	yes	3;4	0.00028332	69.922		1		2	2	1	72984000	16574000	43259000	7058100	0	6092100	0
CCAEADPPACYATVFDQFTPLVEEPK	26	0	3014.31	F7BAY6;Q5XLE4	F7BAY6	383	408	no	3;4	6.5771e-17	110.6	1	1	2	1	4	3	2492300000	355970000	754940000	718490000	265380000	320710000	76765000
CCEDGMR	7	0	926.304	F7BTW7;F7E454;F7CJG3	F7BTW7	692	698	yes	2	0.0075357	135.5	1	1		1	1	1	1591300000	167290000	537780000	397780000	319980000	168490000	0
CCEHGMR	7	0	948.336	F7BLE3	F7BLE3	692	698	yes	2	7.4788e-05	160.77	1	1	1	1	1	1	3508400000	740520000	517320000	631240000	863120000	668050000	88127000
CCESTSEDCMAK	12	0	1476.5	F6T0P6	F6T0P6	265	276	yes	2	1.8409e-08	157.96	3	2	1	2	3	3	5649100000	1304600000	1267000000	960790000	989500000	855410000	271840000
CCGAEDK	7	0	838.295	F7BAY6;Q5XLE4	F7BAY6	581	587	no	2	0.0039828	138.85	2	1	2	3	1	2	4148300000	257290000	0	0	685560000	97032000	3108400000
CCGAEDKEACFAEEGPK	17	1	1956.77	F7BAY6;Q5XLE4	F7BAY6	581	597	no	2;3	5.6461e-141	314.04	11	11	9	12	13	12	53940000000	5878900000	21986000000	5659800000	14464000000	4925300000	1025400000
CCKLPESER	9	1	1177.52	F7BAY6;Q5XLE4;P35747	F7BAY6	460	468	no	3	0.010699	81.163				1	1	1	128650000	37730000	42994000	47925000	0	0	0
CCLDGLTR	8	0	993.437	F6XSF7	F6XSF7	708	715	yes	2	8.6652e-06	169.37	1	1	1	1	1	1	889860000	186070000	245210000	109730000	130640000	185370000	32849000
CCSINSPPLYCDSEIDAEMK	20	0	2387.97	F6T0P6	F6T0P6	452	471	yes	2;3	1.0349e-15	158.81	7	5	3	7	4	7	2858600000	589790000	336060000	583000000	499430000	462720000	387610000
CCTDSLAER	9	0	1110.44	F7BAY6;Q5XLE4;P35747	F7BAY6	499	507	no	1;2	4.601e-97	280.54	6	11	5	5	6	10	76713000000	20417000000	21928000000	1513500000	22469000000	1320900000	9063300000
CCTDSLAERRPCFSALELDEGYVPK	25	2	2972.35	F7BAY6;P35747	F7BAY6	499	523	no	4	2.1138e-05	64.589		1		1	1		70186000	21466000	8985200	0	0	39735000	0
CDDWGLDTMR	10	0	1267.5	F7ASE1;F7AWQ9	F7ASE1	28	37	yes	2	8.9257e-05	135.71	1	1	1	1	1	1	123310000	20783000	29749000	29303000	18040000	22172000	3258700
CDEWSVNSGGNIECESAQSTEDCIAK	26	0	2945.18	F6ZEH8;Q9TQV8;P27425	P27425	376	401	no	2;3	2.5825e-08	86.211	10	9	2		4	1	920980000	0	183360000	10918000	309470000	389190000	28045000
CDHFKPMSTGVSPLALIK	18	1	2000.02	F6YCW8;F6YE73;F6Z5E1	F6YCW8	171	188	yes	4	0.00068521	53.255	1	1		1	1	1	42294000	8251800	15728000	7382800	3919800	7011800	0
CDPHEATCYDDGK	13	0	1566.57	F7CN05;F7CN11;F7CS60;Q28377	F7CN05	2197	2209	yes	2;3	2.6004e-06	140.45	2	2	1	2	2	2	412950000	83565000	148850000	114270000	21581000	29853000	14835000
CDPIDQCQDSETR	13	0	1622.63	F7CN05;F7CN11;F7CS60	F7CN05	554	566	yes	2	1.9113e-05	167.12	1	1	1	1	1	1	576900000	186980000	152380000	158750000	23589000	40867000	14330000
CDSNPCFR	8	0	1054.4	F7E0P3	F7E0P3	261	268	yes	2	0.023107	111.04						1	0	0	0	0	0	0	0
CEACPPGYSGPTHEGVGMAFAK	22	0	2321.99	Q9BG80;F6U3D3	Q9BG80	149	170	yes	3	0.021017	28.178				1		1	15836000	8550200	0	7286100	0	0	0
CECICPVGFR	10	0	1296.54	F7AXF6	F7AXF6	523	532	yes	2	5.5359e-06	174.73	1	1	1	1	1	1	470000000	152340000	175880000	49067000	41095000	39023000	12597000
CEGFVCAQTGR	11	0	1283.54	F7AXF6	F7AXF6	124	134	yes	2	0.0044447	93.111		1	1	1	1	1	94251000	22995000	20755000	21890000	0	18610000	10001000
CEGQMPDVTFELLR	14	0	1693.78	F6VJR6	F6VJR6	427	440	yes	2;3	1.1644e-87	257.8	4	5	5	4	4	4	10321000000	1724400000	2485500000	1442200000	1922800000	1540700000	1205500000
CEGSSVQTR	9	0	1022.45	F6YR34	F6YR34	413	421	yes	2	0.0020061	122.52						1	47504000	0	0	47504000	0	0	0
CEVQHYTSPSK	11	0	1334.59	H9GZV1	H9GZV1	82	92	yes	2;3	1.3194e-26	237.92	2	2	2	2	2	2	6450000000	1420300000	2296800000	1072600000	764700000	663910000	231660000
CEWEVPR	7	0	974.428	F6YWC0	F6YWC0	114	120	yes	2	0.0017244	151.51	1	1	1	1	1	1	338900000	95151000	98635000	53457000	66739000	18102000	6816700
CFDHHFLQGSR	11	0	1402.62	F7C7J6	F7C7J6	554	564	yes	2;3;4	8.0045e-09	164.68	3	1		3	3		225920000	68199000	94779000	0	57651000	5293100	0
CFFHNK	6	0	851.375	F7B3I5	F7B3I5	124	129	yes	2	0.031046	122.91	1			1	1		122280000	46712000	44356000	0	31211000	0	0
CFLAFTQAK	9	0	1084.54	F7AW05	F7AW05	81	89	yes	1;2	0.00045225	146.54	2	1	1	2	2	2	305070000	64232000	78199000	59887000	43616000	40852000	18287000
CFSGQCISK	9	0	1085.46	F6Q7J3	F6Q7J3	90	98	yes	2	0.00044293	144.12	1	1	1		1	1	225350000	0	60070000	44983000	86147000	26531000	7615700
CGEDLQWLVGK	11	0	1303.62	F6Q7J3	F6Q7J3	612	622	yes	2	9.1089e-13	178.94	1	1	1	1	1	1	251480000	44038000	49686000	48864000	45198000	45485000	18210000
CGGHCPGQAQESEACDTK	18	0	1990.76	F6SP74	F6SP74	169	186	yes	2;3	2.3695e-05	64.52	2	2	2	2	2	2	430040000	96056000	137130000	65954000	69072000	50658000	11175000
CGLPFFGQILLVDEK	15	0	1734.9	F6REX3	F6REX3	359	373	yes	2	0.00060362	95.094	1	1	1	1	1	1	197830000	41425000	56619000	30602000	23117000	31664000	14405000
CGNQLQVR	8	0	973.476	F7D7B5	F7D7B5	539	546	yes	2	7.0281e-28	188.61	1	1	1			1	152170000	0	0	44086000	0	67858000	40226000
CGPASVQALK	10	0	1029.53	F6UZI2	F6UZI2	417	426	yes	2	0.014064	87.308	1	1	1	1	1	1	88451000	18049000	26434000	12756000	19077000	11197000	938900
CGPCFNNGEPILQGTSCR	18	0	2065.88	F7CFN5	F7CFN5	463	480	yes	2	0.00097422	85.258	1	1	1	1	1	1	42328000	7875200	8366500	9411300	6335500	9223200	1116500
CGRPDFPGVYTK	12	1	1395.66	F7APU2;F7AU56	F7APU2	526	537	yes	2;3	0.0013935	106.29	1	2	1	2	1	2	753030000	161290000	184380000	129220000	92050000	157440000	28653000
CHEGGQSYK	9	0	1064.43	F7CN05;F7CN11;F7CS60	F7CN05	140	148	yes	2	3.0952e-06	168.27	1	1		1	1	1	690720000	184010000	165930000	251830000	43360000	45586000	0
CIGQGGQCSEK	11	0	1222.51	F6SP74	F6SP74	103	113	yes	2	5.6362e-07	155.58	1	1		1	1	1	394290000	83898000	91320000	65286000	75777000	78009000	0
CIHAEDITHNGIIYTPK	17	0	1980.97	F6REX3	F6REX3	641	657	yes	2;3;4	2.7157e-10	129.05	2	2	2	3	3	2	442030000	93542000	118390000	82833000	41429000	71039000	34796000
CIISGWGR	8	0	947.465	F7APU2;F7AU56	F7APU2	443	450	yes	2	0.0067847	123.99	1	1	1	1	1	1	399690000	86714000	95014000	67569000	62993000	68208000	19188000
CKPGYVTADGK	11	1	1194.57	F6ZR63	F6ZR63	477	487	yes	3	0.011467	55.806	1	1	1	1	1		950090000	474020000	2823500	0	131650000	323440000	18158000
CLADGAGDVAFVK	13	0	1321.63	F6ZEH8;Q9TQV8;P27425	P27425	215	227	no	2;3	4.8065e-07	116.23	4	5	4	5	3	4	20318000000	3470000000	3975900000	3520800000	4562300000	3045000000	1743500000
CLAFECPENYR	11	0	1457.61	F7ABC9	F7ABC9	532	542	yes	2	0.0032969	122.52	1	1	1		1	1	79457000	0	22331000	19218000	18092000	12552000	7263500
CLDACVISEEK	11	0	1322.58	F6ZR63;F7E2N9	F6ZR63	1168	1178	no	2	0.00074494	129.85	1	1	1	1	1	1	341630000	68796000	105290000	58155000	62165000	37059000	10162000
CLEAEGR	7	0	833.37	F7DGR1	F7DGR1	189	195	yes	2	0.04859	97.473	1	1		1	1	1	352720000	65209000	91088000	43337000	83897000	69190000	0
CLPQTDQAPLVVQVHPAR	18	0	2028.06	F7C0I7	F7C0I7	1645	1662	yes	3	0.0045603	42.813					1		6285000	0	6285000	0	0	0	0
CLPVTEPENGR	11	0	1270.6	F6ZR63	F6ZR63	146	156	yes	2	1.1662e-05	185.47	1	1	1	1	1	1	562570000	250660000	107690000	64851000	49687000	67575000	22099000
CLQDGAGDVAFVR	13	0	1406.66	F6PKE1;O97668	F6PKE1	206	218	yes	2;3	1.613e-37	207.83	1	1	2	1	1	1	897150000	165040000	145840000	236560000	118870000	197220000	33636000
CNEYYLLR	8	0	1129.52	F7C7J6	F7C7J6	425	432	yes	2	2.8029e-05	163.34	1	1	1	1	1	1	121890000	33756000	42781000	19955000	20570000	0	4825300
CNLLAEK	7	0	846.427	F7C450	F7C450	218	224	yes	2	0.026867	117.16	1	2		2	2	2	10889000000	3653200000	2770900000	2518600000	33326000	1913100000	0
CPAGYAGR	8	0	850.376	F7DGR1	F7DGR1	200	207	yes	2	0.008954	120.86	1	1		1	1	1	98293000	25431000	20185000	14532000	19628000	18516000	0
CPAPELLGGPSVFIFPPK	18	0	1925.01	H9GZS9	H9GZS9	134	151	yes	2;3	1.0428e-08	134.98	1	1	1	1	2	2	173180000	39737000	42616000	26345000	13695000	29142000	21641000
CPAPELLGGPSVFIFPPKPK	20	1	2150.16	H9GZS9	H9GZS9	134	153	yes	2;3;4	1.0705e-17	143.39	4	3	2	5	4	4	2941800000	1013400000	657550000	289660000	341970000	521190000	117980000
CPAPELLGGPSVFIFPPNPK	20	0	2136.11	Q95M34;H9GZQ9	Q95M34	117	136	yes	2;3;4	2.488e-116	253.97	5	6	7	5	6	5	54367000000	13748000000	10824000000	7367400000	9466700000	7140100000	5820700000
CPAPELPGGPSVFIFPPK	18	0	1908.98	H9GZU9	H9GZU9	106	123	yes	2;3	7.7133e-30	151.7	5	5	4	5	5	5	2449300000	258120000	872370000	531720000	365320000	246010000	175780000
CPAPELPGGPSVFIFPPKPK	20	1	2134.13	H9GZU9	H9GZU9	106	125	yes	2;3;4	5.7481e-20	195.1	7	6	4	6	7	7	38764000000	4575900000	14346000000	9070000000	5643700000	3526600000	1601200000
CPEYYQLDGSSFVQCINGK	19	0	2263.99	F6ZR63	F6ZR63	1024	1042	yes	2;3	1.3716e-62	211.22	2	2		2	2	2	289670000	74973000	61569000	50636000	57439000	45058000	0
CPFPSRPENGFVNYPAK	17	1	1978.94	F6Z041	F6Z041	205	221	yes	2;3	7.1123e-09	97.203	2	2	2	2	2	2	1109000000	248150000	271540000	153320000	179100000	207060000	49875000
CPGRPWKPVDR	11	2	1366.69	F7C0D9;F7C0Z0	F7C0D9	615	625	yes	2;3	1.6483e-06	155.42	2	2	1	2	2	2	1154200000	111010000	290300000	241770000	214070000	295280000	1788300
CPLFEHFLK	9	0	1189.6	F7ASE1;F7AWQ9	F7ASE1	51	59	yes	3	0.0057258	85.744	1	1	1	1	1	1	79941000	16090000	31308000	10743000	5912900	10495000	5392300
CPLQLPDAEPVGICK	15	0	1695.83	F6RRV1	F6RRV1	219	233	yes	2;3	3.7894e-06	130.01	1	2	2	2	1	2	1263500000	366210000	495380000	186080000	110140000	83877000	21820000
CPPPPIPK	8	0	904.484	F6Z041	F6Z041	142	149	yes	1;2	0.031573	99.919	4	3	1	4	3	3	2141900000	558180000	380930000	285440000	569270000	305200000	42856000
CPRPQDFENGEYWPR	15	1	1949.85	F6RMD0	F6RMD0	103	117	yes	3	1.3299e-08	145.43	1	2	2	2	2		139940000	44706000	43699000	0	0	36801000	14736000
CPSGFYPYPMQVR	13	0	1600.72	F6RMD0	F6RMD0	62	74	yes	2	0.00013422	105.36	1	1	1	1	1	1	610560000	159470000	141930000	104780000	91020000	92110000	21246000
CPTPPVQENFDVTK	14	0	1630.77	F6XM13	F6XM13	52	65	yes	2	1.0527e-20	178.71	3	2	1	2	2	2	579770000	58017000	82920000	128720000	169470000	108310000	32332000
CQEILSVDCSTNNPSQMQLR	20	0	2379.06	Q29482	Q29482	305	324	yes	2;3	1.1856e-46	185.87	2	3	1	2	3	1	798840000	294390000	296070000	5075100	120580000	41684000	41037000
CQHEMDQYWAIGR	13	0	1692.71	F7AXF6	F7AXF6	164	176	yes	2;3	0.0014424	107.83	1	1	1	1	2	1	130730000	27740000	49441000	19352000	12235000	16557000	5403800
CQIAGWGHQDENLSGYSSSLR	21	0	2364.06	F6ZEJ2	F6ZEJ2	391	411	yes	3	0.04457	22.375					1	1	23854000	0	14304000	9549900	0	0	0
CQPVDCGSPEPIEHGK	16	0	1808.78	F7BQD6	F7BQD6	360	375	yes	2;3	3.0842e-06	116.54	2	2	2	2	2	2	754070000	186880000	138810000	138110000	128060000	141940000	20272000
CRNPGELHNGQISK	14	1	1608.78	F7BNQ2	F7BNQ2	119	132	yes	2;3;4	0.00029568	89.624	2	2	1	3	3	2	348690000	95166000	125390000	48381000	28642000	44552000	6552700
CSDGWSSDATTLDEHGAMVFFK	22	0	2460.04	F6X1I8	F6X1I8	52	73	yes	2;3;4	1.4577e-28	232.13	16	14	12	17	8	15	5726900000	966640000	978520000	759910000	995310000	980160000	1046400000
CSETQQSFSNSSPTDTQVPSVQEPSEPDCMLGIGK	35	0	3826.66	F6USP9	F6USP9	460	494	yes	3;4	8.0093e-08	54.388	1	1	2	2		2	187020000	54555000	0	54308000	15621000	24380000	38151000
CSLKPCDFPEIK	12	1	1492.71	F6ZR63	F6ZR63	320	331	yes	2;3	5.0237e-05	141.1	2	2	1	2	2	2	2648700000	1008100000	584730000	170060000	295470000	427710000	162650000
CSPDLALSALVSDNHGATYAFSESHHWR	28	0	3127.42	F6X1I8	F6X1I8	257	284	yes	4;5	1.131e-18	121.3	4	5	4	4	7	7	457440000	45984000	98676000	97606000	58973000	86815000	69383000
CSSFQK	6	0	755.327	Q5XLE4	Q5XLE4	223	228	yes	2	0.019382	144.01	2	3	4	2	2	3	69296000000	11896000000	11995000000	12220000000	9807000000	13460000000	9918700000
CSSFQKFGER	10	1	1244.56	Q5XLE4	Q5XLE4	223	232	yes	2;3	0.00068684	144.09		2	1	1	1	2	107130000	5455400	9227000	43666000	0	44996000	3784600
CSTPPPSSGPTYQCLK	16	0	1778.8	F6USP9	F6USP9	268	283	yes	2;3	8.3013e-08	164.04	7	3	2	3	4	6	750920000	169520000	184700000	105410000	158980000	94138000	38174000
CSVFYGAPTK	10	0	1128.53	F6XSF7	F6XSF7	1572	1581	yes	2	5.3836e-08	185.6	1	1	1	2	1	1	301050000	63950000	52674000	47019000	62202000	57375000	17828000
CTCVGNGR	8	0	922.375	F7CN05;F7CN11;F7CS60	F7CN05	495	502	yes	2	0.00012135	158.38		1		1	1	1	137800000	34637000	35676000	51650000	0	15833000	0
CTEGFNSDR	9	0	1084.42	F6V881	F6V881	28	36	yes	2	0.0073734	130.28	1	1	1	1	1	1	965180000	148150000	167210000	222960000	219490000	164540000	42842000
CTEGFNSDRK	10	1	1212.52	F6V881	F6V881	28	37	yes	3	0.0012022	94.804			1		1		45413000	0	45053000	0	0	0	359760
CTPEVQE	7	0	861.354	F7BNQ2	F7BNQ2	596	602	yes	1	9.8321e-05	164.89	1	1		1	1	1	962780000	249050000	228150000	213820000	135950000	135810000	0
CTSSGWVPSPR	11	0	1232.56	F6ZR63	F6ZR63	309	319	no	2	5.3037e-35	214.83	1	1		1	1	1	841290000	220830000	181970000	146020000	174610000	117860000	0
CTVSHPDLPR	10	0	1180.57	H9GZV0	H9GZV0	294	303	yes	2;3	2.0704e-17	200.54	2	1	2	2	2	2	255510000	47402000	49056000	109620000	21319000	22554000	5554700
CTYSNPEGTVVLACDEVQCR	20	0	2357.01	F6QFD9	F6QFD9	481	500	yes	2;3	3.6256e-36	173.87	2	2	2	2	2	2	519590000	110480000	111450000	91998000	106800000	77484000	21374000
CVCPVSNAVCR	11	0	1320.57	F6T0M8;F6PVG3	F6T0M8	374	384	yes	2	5.8864e-05	135.83	1			1	1	1	96832000	15598000	18150000	39129000	23955000	0	0
CVDAVGDR	8	0	890.392	P48770;F6UFT2	P48770	78	85	yes	2	0.024022	107.59	1	1		1	1	1	562260000	69092000	110460000	149620000	95620000	137470000	0
CVDAVGDRR	9	1	1046.49	P48770;F6UFT2	P48770	78	86	yes	2	0.0039385	113.7				1	1		24723000	0	24723000	0	0	0	0
CVDVDECSPPAEPCGPGHR	19	0	2137.86	F7ABC9	F7ABC9	335	353	yes	3	1.6258e-05	92.211	1	2	1	1	1	2	121720000	27753000	25800000	28459000	14212000	17812000	7682900
CVEADCGQMQR	11	0	1352.53	F7A692	F7A692	231	241	yes	2	1.9857e-12	172.21	2	1		2	1	1	1092100000	310770000	263400000	142250000	213580000	162070000	0
CVEEFQSLTSCLDSK	15	0	1801.79	F6UEG9	F6UEG9	157	171	yes	2	2.6503e-23	172.92	1	1	1	1	1	1	276780000	52849000	59576000	54123000	48189000	37719000	24327000
CVEISCQVPEILNGYAISQK	20	0	2307.12	F6ZR63	F6ZR63	205	224	yes	2;3	2.0508e-12	127.36	1	2	2	2	2	2	360500000	90710000	63139000	50857000	27223000	72622000	55953000
CVEPYVQVSDNR	12	0	1464.67	F6T962	F6T962	315	326	yes	2	0.0026076	90.108				1	1		22144000	12435000	9708700	0	0	0	0
CVESAECPCVHSGK	14	0	1618.65	F7BAT4;A0A061DBP6	F7BAT4	325	338	yes	3	0.0012297	65.043				1	1	2	67614000	20799000	24990000	21825000	0	0	0
CVLFTYGGCR	10	0	1231.55	F6UZH0;P04365	F6UZH0	312	321	yes	2	2.483e-17	186.13	1	1	1	1		1	815380000	235150000	0	185990000	163400000	149300000	81531000
CVLLAENR	8	0	973.501	F6USP9	F6USP9	79	86	yes	2	3.5822e-05	160.91	1	1	1	1	1	1	1767100000	357130000	417750000	365260000	277210000	215730000	134020000
CVNHYGGYLCLPK	13	0	1579.73	F6T0M8;F6PVG3	F6T0M8	61	73	yes	3	0.0024056	63.473	1	1	1			1	33220000	0	0	12064000	8963700	8309100	3882900
CVNSPGSFR	9	0	1022.46	F7ABC9	F7ABC9	354	362	yes	2	0.0076507	110.31				1	1	1	41919000	14599000	11602000	15717000	0	0	0
CYDGYTLR	8	0	1046.45	F6RMD0	F6RMD0	131	138	yes	2	1.5526e-05	167.24	1	1	1	1	1	1	2496600000	437180000	453970000	397960000	623380000	509500000	74647000
DAEAWFNEK	9	0	1108.48	F6SJK9;F6SQQ0;F6WDW3;F6SS14;F6Z000;F7AFB5;F6ZNL2;F6QVE6	F6SJK9	225	233	yes	2	0.014385	101.64	1	1		1		1	53544000	9452900	0	5286000	28042000	10764000	0
DAFTGPGQR	9	0	947.446	H9GZN9	H9GZN9	117	125	yes	1;2	0.00026299	152.31	2	2	3	2	1	2	17459000000	3603800000	4042700000	3179800000	3818800000	2254000000	560030000
DALENIDPATQMMILNCIYFK	21	0	2499.18	F7BM31	F7BM31	273	293	yes	2	8.2729e-05	89.959				1			5353400	5353400	0	0	0	0	0
DALMISR	7	0	804.416	H9GZS6;H9GZR2	H9GZS6	138	144	yes	2	6.623e-05	162.07	1	1	1	2	2	2	6815300000	2005300000	2088200000	885340000	1296100000	538280000	2022600
DAQNNLSMTR	10	0	1148.52	F6W4R2	F6W4R2	326	335	yes	2	0.0089554	95.502		1				1	0	0	0	0	0	0	0
DAQYASGYDK	10	0	1116.47	F6RMD0;K9KBR1	F6RMD0	663	672	yes	2	0.0013812	116.3	1	2			1	1	839680000	0	278550000	123140000	354350000	83646000	0
DASLLDVVQGYMQQASK	17	0	1851.9	P0DN28;Q95MC0	P0DN28	23	39	yes	2;3	2.5665e-40	250.69	2	2	1	2	1	1	218970000	70700000	16421000	11751000	74497000	40525000	5072400
DCCAIAEQLR	10	0	1234.54	F7D7B5	F7D7B5	702	711	yes	2	1.2802e-08	170.3	1	1	1	1	1	1	752970000	195160000	187870000	104150000	133850000	104010000	27924000
DCKDVDECTTQPSICGTAVCK	21	1	2443.01	F6Z352	F6Z352	172	192	yes	3	0.00013326	48.229	1	1		1	1	1	70053000	0	23348000	18149000	13812000	14744000	0
DCLDGSDEDDCEDVR	15	0	1798.63	F7CFN5	F7CFN5	82	96	yes	2	1.1553e-05	143.17	1	1		1	1	1	155380000	37370000	36635000	29475000	33800000	18095000	0
DCQDIANK	8	0	962.413	F6W2Y1	F6W2Y1	178	185	yes	2	0.027118	104.45	1	1		1	1		90571000	57821000	12109000	0	14849000	5793300	0
DCSLPYASESK	11	0	1255.54	F7ABC9	F7ABC9	27	37	yes	2	0.0022416	117.01	1	1		1	1	1	167250000	41248000	40459000	37550000	34203000	13788000	0
DCYLASIPSHAVVAR	15	0	1657.82	F6ZEH8;Q9TQV8;P27425	P27425	261	275	no	2;3;4	1.3175e-16	204.69	4	3	3	4	3	3	24120000000	5999600000	4320100000	3996900000	5237800000	3477800000	1087900000
DDDIAALVVDNGSGMCK	17	0	1778.78	P60708	P60708	2	18	yes	2	3.8638e-91	240.8	1			1	1	1	55760000	23249000	15838000	0	16673000	0	0
DDEEFIESNK	10	0	1224.51	F6PQ46	F6PQ46	948	957	yes	2	4.2015e-25	204.27	1	1		2	1	1	2056400000	272990000	198600000	547030000	709880000	327920000	0
DDFLIYDR	8	0	1055.49	A0A1L1R2Y5	A0A1L1R2Y5	132	139	yes	2	0.017567	113.41	1	1	1	1	1	1	127880000	29361000	32869000	20233000	21073000	19834000	4505800
DDHPNLPK	8	0	934.451	F7BAY6;Q95MC2;Q5XLE4;P35747	F7BAY6	131	138	no	2	0.00033156	155.51	3	3	2	3	4	3	69226000000	15477000000	16912000000	9334800000	12999000000	10203000000	4299600000
DDHPNLPKLK	10	1	1175.63	F7BAY6;Q95MC2;Q5XLE4;P35747	F7BAY6	131	140	no	3	0.004429	76.943	3	2		2	1	2	187920000	44781000	20599000	33340000	59730000	29469000	0
DDHPNLPKLKPEPDAQCAAFQEDPDK	26	2	2974.38	F7BAY6;Q95MC2;Q5XLE4;P35747	F7BAY6	131	156	no	4	0.0015398	34.715		1	1	1	1	1	72928000	25162000	10640000	15279000	0	17229000	4619000
DDINSYECWCQPGFEGK	17	0	2103.83	F6RFT9	F6RFT9	110	126	yes	2	4.0146e-05	84.718		1		1	1	1	54620000	12435000	17355000	11357000	0	13473000	0
DDKESVPISDTIIPAVPPPTDLR	23	1	2474.29	F7CN05;F7CN11	F7CN05	1251	1273	yes	2;3	2.0056e-27	183.23	1	2	1	2	1	2	707780000	158040000	88986000	302260000	37858000	44292000	76353000
DDNPCKGESGGAVFLER	17	1	1849.83	F6PPQ0	F6PPQ0	665	681	yes	3	0.001081	51.798						1	0	0	0	0	0	0	0
DDTECLANLQPTTTYK	16	0	1868.85	O97677	O97677	28	43	yes	2;3	2.2875e-05	91.937	3	2		2	2	2	286650000	36642000	74912000	55603000	74968000	44526000	0
DDTQCLANLQPTTTYK	16	0	1867.86	F6ZEH8;Q9TQR4;Q71UB5;P27425;O97971	P27425	660	675	no	2;3	1.1095e-96	256.52	5	5	5	5	5	5	40467000000	6415200000	9019900000	7852200000	8067200000	6914200000	2198100000
DDYQLLCR	8	0	1081.49	F6PKE1	F6PKE1	233	240	yes	2	0.0058405	125.86	1	1	1	1	1	1	257060000	61084000	45888000	48348000	59761000	34445000	7537200
DECCPVCPEGQVSPTDDQTTGVEGPK	26	0	2861.18	F7D9C7;F7D939;F6VUP8;F7A3F7;B9VR88	F7D9C7	89	114	yes	3	8.6812e-06	47.52	1			1		1	32809000	10309000	0	10880000	11620000	0	0
DECFASR	7	0	883.349	F6QYS3	F6QYS3	398	404	yes	2	0.012138	130.05		1	1	1		1	175750000	39168000	0	65839000	0	49917000	20822000
DETVALTAFVVIALHHGLSVFQDEGTQELK	30	0	3266.68	F6XSF7	F6XSF7	1142	1171	yes	4	0.02343	24.032			1				8666000	0	0	0	0	0	8666000
DEYQLLCR	8	0	1095.5	F6ZEH8;Q9TQV8;P27425	P27425	242	249	no	2	4.5676e-08	150.02	1	1	1	1	1	1	6694600000	0	0	1438000000	4231200000	888530000	136910000
DFADFIHSSNQQK	13	0	1535.7	F6QAD8;F6R6K3;F6R7S3	F6QAD8	628	640	yes	2;3	3.9863e-06	162	2	1	2	2	1	2	1295400000	334590000	215800000	236150000	289160000	149860000	69857000
DFDSVPPVVR	10	0	1129.58	F7BTW7;F7E454;F7CJG3	F7BTW7	1244	1253	yes	2;3	2.2025e-06	141.39	3	1	1	4	2	3	1119200000	318940000	294330000	146250000	162160000	142840000	54632000
DFHINLFR	8	0	1060.55	F6PPQ0	F6PPQ0	720	727	yes	3	0.00027833	135.84	1	1		1	1	1	24681000	5823200	5774100	5100900	3895700	4087500	0
DFHLFSSPHGK	11	0	1270.61	F6ZEH8;Q9TQV8;P27425	P27425	302	312	no	2;3	7.088e-07	154.56	6	4	3	6	7	5	7976600000	2029000000	2405000000	1387200000	1088300000	848860000	218190000
DFIEFNK	7	0	911.439	F7CAB8	F7CAB8	143	149	yes	2	0.040691	106.76	1	1	1	1	1	1	552030000	132670000	114740000	93194000	109280000	66189000	35958000
DFNCTTSSVSSALANTK	17	0	1801.82	F6ZI35	F6ZI35	121	137	yes	2	0.00016279	74.46						1	5842700	0	0	5842700	0	0	0
DFNNFEVTIK	10	0	1225.6	F7D7B5	F7D7B5	214	223	yes	2	0.0013625	116.52	1	1		1	1	1	79505000	29697000	14293000	0	19771000	15744000	0
DFQLFK	6	0	796.412	F6VJR6	F6VJR6	57	62	yes	1	0.045239	141.98	1	1	1	1	1	1	1693400000	377160000	531230000	252200000	313560000	179490000	39715000
DFTPELQASYQK	12	0	1425.68	P02062;D1MPT0;F6RDD3	P02062	121	132	yes	2	0.00047127	159.79	1	2	2	1	1	1	1765600000	337140000	147180000	301630000	324780000	476160000	178740000
DFYPPDINVEWQSNEEPEPEVK	22	0	2660.19	H9GZU8	H9GZU8	246	267	yes	2;3	4.4843e-58	206.43	6	4	9	7	10	3	2751300000	420680000	647770000	134000000	376750000	447850000	724200000
DFYPPDISVEWQSNR	15	0	1851.84	H9GZS6;H9GZR2	H9GZS6	260	274	yes	2;3	1.2567e-43	207.29	2	2	1	2	2	2	462130000	103400000	102870000	68752000	74063000	63546000	49504000
DFYPPEIDVEWQSNEHPEPEGK	22	0	2641.16	H9GZU9	H9GZU9	247	268	yes	2;3;4	3.0526e-136	267.07	10	7	11	9	6	5	12780000000	753730000	506870000	3747500000	2408500000	2368900000	2994200000
DFYPTDIDIEWK	12	0	1540.71	H9GZT5	H9GZT5	257	268	yes	2	0.0021718	110.14	1	1	1	1	1	1	1420000000	251630000	239010000	237130000	398430000	203960000	89817000
DFYPTDITVEWQSNEHPEPEGK	22	0	2617.16	H9GZS9	H9GZS9	276	297	yes	2;3	2.6801e-16	128.05	1	1	2	1	1	1	417720000	57427000	40752000	41492000	0	80178000	197870000
DGEDLTQDTELVETR	15	0	1719.78	C9K796;F7DB76;Q861M4;Q861M3;Q0R0D8;Q0R0D5;Q0R0D0;Q30487;Q0R0B5;Q0R0B4;Q861M6;Q861M5;Q861M1;Q861K2;Q0R0B3;Q0R0D6;B2X053;F6UE14;F2VYY4;Q38RB3;F7DXG2;F6V143;F6W143;M4PPR7;Q0R0C2;B2X061;Q861L1;Q861L3	M4PPR7	244	258	no	2	4.6594e-06	156.51	1	1	1	1	1	1	461510000	126720000	51921000	89693000	133000000	22652000	37519000
DGEDLTQDTELVETRPAGDGTFQK	24	1	2621.21	C9K796;F7DB76;Q861M4;Q861M3;Q0R0D8;Q0R0D5;Q0R0D0;Q30487;Q0R0B5;Q0R0B4;Q861M6;Q861M5;Q861M1;Q861K2;Q0R0B3;Q0R0D6;B2X053;F6UE14;F2VYY4;Q38RB3;F7DXG2;F6V143;M4PPR7;Q0R0C2;B2X061;Q861L1	M4PPR7	244	267	no	2;3	2.564e-54	188.32	3	2	2	2	2	3	968240000	63090000	49771000	340950000	277230000	84924000	152280000
DGEQHVFK	8	0	958.451	F6RMD0	F6RMD0	447	454	yes	2	0.003226	131.03	1	1	1	1	1	1	835770000	130740000	223850000	205480000	99374000	159590000	16735000
DGFVQDEGAMFPVGK	15	0	1595.73	F6Q7J3	F6Q7J3	578	592	yes	2	3.0485e-05	110.66	1	1	1	1	1	1	414270000	63225000	71010000	71250000	86807000	89543000	32438000
DGHDGLPGPK	10	0	991.472	F7DBT2;A0A3B0ITF5	F7DBT2	48	57	yes	2	0.060861	67.032	1	1	1	1	1	1	1497000000	2335700	370120000	379320000	452140000	248410000	44689000
DGIGDACDEDADGDGVLNEQDNCVLTHNMDQR	32	0	3547.42	F7E0P3	F7E0P3	472	503	yes	3	0.053603	14.593	1		1			1	15537000	0	0	7093200	6315100	0	2129200
DGKPVESGFTTEEVQPQNK	19	1	2089	H9GZN9	H9GZN9	148	166	yes	2;3	7.0787e-49	206.43	4	3	3	4	4	4	37176000000	8107100000	7542000000	6813900000	5813400000	6006600000	2893200000
DGNTLTYYR	9	0	1101.51	P48770;F6UFT2	P48770	186	194	yes	1;2	3.5917e-05	180.93	2	2	1	2	2	2	745780000	166780000	152210000	106060000	216470000	89399000	14860000
DGQEHGVVLAPDGSTVAVQPLLAGLEAGLQGR	32	0	3153.64	F6QDQ1	F6QDQ1	105	136	yes	3	8.7562e-13	84.962	1	1		1	1	1	72188000	12032000	13632000	11981000	19164000	15378000	0
DGSYSAFGDQHGK	13	0	1367.57	F6QAD8;F6R6K3;F6R7S3	F6QAD8	1017	1029	yes	2;3	0.0013063	127.76	2	2		2	2	2	1091900000	251370000	290360000	144180000	219440000	186580000	0
DGVAQEPVQVGSPTIEHQFPLGAVTSDTR	29	0	3034.5	F6VJR6	F6VJR6	63	91	yes	3;4	2.2947e-56	184.25	2	2	2	3	3	3	11680000000	1879900000	1977500000	2034300000	1938300000	1938600000	1911100000
DGVGDVCQGDFDADK	15	0	1596.64	Q9BG80;F6U3D3;Q9N2C3	Q9BG80	496	510	yes	2	8.2772e-05	83.182	1			1		1	25942000	7769200	0	6438100	11735000	0	0
DGWHSWPIDHQWPK	14	0	1787.82	F6X1I8	F6X1I8	290	303	yes	2;3;4	5.7495e-21	181.4	3	4	4	3	3	3	1430800000	268480000	285830000	247730000	215220000	305140000	108390000
DGWSDTATCYER	12	0	1459.57	F6ZR63	F6ZR63	556	567	yes	2	3.9109e-31	208.25	1	1	1	1	1	1	2213300000	718680000	638420000	266620000	269430000	244760000	75345000
DHAVDLIQK	9	0	1037.55	F6XSF7	F6XSF7	1049	1057	yes	2	2.104e-30	214.69	2	2	1	2	2	1	3723300000	858080000	829320000	746450000	688630000	424260000	176550000
DHSPCHAFQWLSEENEEAHHTANLVFSPSK	30	0	3503.56	F6RI47;F6R942	F6RI47	427	456	yes	3;4;5;6	3.1753e-57	167.23	18	24	16	16	20	16	5220100000	825930000	1082000000	952890000	922010000	962010000	475260000
DIASGLIGPLIVCK	14	0	1454.82	F6PQ46	F6PQ46	187	200	yes	2	7.9308e-09	148.32	1	1	1	1	1	1	2742000000	658490000	529640000	415690000	456810000	431570000	249790000
DICEGQVNSLAGSITK	16	0	1690.82	F7BTW7;F7E454;F7CJG3	F7BTW7	1155	1170	yes	2;3	4.3677e-82	237.67	4	3	2	4	5	4	2649800000	502550000	606110000	510120000	494010000	406240000	130790000
DICEGQVNSLAR	12	0	1360.64	F7BLE3	F7BLE3	1157	1168	yes	2	3.8932e-12	166.34	1	1	1	1	1	1	5357800000	1145300000	1053000000	1158100000	801800000	1023000000	176570000
DIDECDIVPDACK	13	0	1548.64	F6T0M8;F6PVG3	F6T0M8	44	56	yes	2	0.0010392	94.692	1	1		1	1	1	90361000	19588000	21738000	16547000	17711000	14778000	0
DIFTGLIGPMK	11	0	1190.64	F6PQ46	F6PQ46	547	557	yes	2	0.00013883	135.79	2	2	2	2	2	1	3207400000	730260000	555690000	469630000	575780000	552080000	323990000
DIHSGLIGPLLICQK	15	0	1662.91	F7DZ01	F7DZ01	991	1005	yes	2;3	1.3676e-32	192.1	1	1		1	2	1	64967000	11234000	23582000	10020000	9953900	10177000	0
DILQNCHTSK	10	0	1214.57	F6SUL8;K9KCI0	F6SUL8	465	474	yes	2;3	0.00033035	130.75	2	2	1	2	1	1	93758000	23177000	11681000	8166400	28543000	20567000	1623100
DILTANDIDIEK	12	0	1358.69	F6XM13	F6XM13	189	200	yes	2	6.7312e-05	138.22	2	2	2	3	2	3	14124000000	2298800000	2157900000	3493200000	2086000000	2393300000	1695300000
DILTLDLSR	9	0	1044.58	F6QYS3	F6QYS3	413	421	yes	2	7.2969e-31	219.7	1	1	1	1	1	1	176260000	35610000	24622000	26588000	41515000	29415000	18507000
DIPVNPMCIYR	11	0	1376.66	F7CYR1;Q9N1X2	F7CYR1	47	57	yes	2	8.7614e-09	163.99	2	2	2	2	1	2	3368900000	565750000	695330000	569300000	527380000	731130000	279990000
DISAVVTPR	9	0	956.529	F6RMD0;K9KBR1	F6RMD0	675	683	yes	2	0.00043401	146.27	1	1	1	1	1	1	1246000000	298890000	283760000	155620000	219080000	218890000	69799000
DIVLPVYDK	9	0	1060.58	F6YCW8;F6YE73;G5CW75	F6YCW8	3630	3638	yes	2	0.012809	103.56	1	1	1	1	1	1	213170000	38301000	41868000	44186000	39952000	31213000	17647000
DIVMTQSPDSLAVSLGQR	18	0	1915.97	F6VC90	F6VC90	1	18	yes	2;3	9.1945e-29	174.73	1	1	2			2	130690000	0	0	46258000	20097000	22780000	41552000
DKGPDVLSAK	10	1	1028.55	F6R3F4	F6R3F4	498	507	yes	2	0.020635	121.8	1	1	1	1	1	1	722900000	218980000	115040000	131190000	127130000	65110000	65444000
DKHADPDFTK	10	1	1172.55	F7DL17;F7CTJ3;F7DAF6	F7DL17	572	581	yes	2;3	9.1911e-08	171.5	2	1	1	2	2	1	944760000	282400000	286640000	113770000	190260000	71462000	224990
DKYEVTAK	8	1	952.487	P48770;F6UFT2	P48770	391	398	yes	2	0.00065086	163.15	1	1		1	1	1	714970000	204160000	194200000	97296000	164930000	54387000	0
DLAPSNVDFAFSLYK	15	0	1685.83	F7DRS2	F7DRS2	37	51	yes	2	3.4634e-05	107.18			1	2	1		64733000	29881000	27867000	0	0	0	6985100
DLATVYVDAVK	11	0	1192.63	F6Z2L5	F6Z2L5	36	46	yes	2;3	0.00082569	111.61	9	4	6	5	3	6	18227000000	4761900000	50867000	67473000	4751800000	5096500000	3498200000
DLEEPINFR	9	0	1131.56	F7ASE1;F7AWQ9	F7ASE1	82	90	yes	2	0.00042667	141.78	1	1	1	1	1	1	178520000	36425000	35607000	29929000	36268000	24645000	15652000
DLEIAEVLFHPNYNINGK	18	0	2085.05	F6RMD0;K9KBR1	F6RMD0	547	564	yes	2;3	1.8781e-62	265.72	2	2	1	2	2	2	657510000	155910000	172230000	81342000	113860000	73236000	60935000
DLELVK	6	0	715.412	F6Z2L5	F6Z2L5	112	117	yes	1	0.0642	122.15	1	1		1	1	1	15417000000	4233800000	4551500000	2054100000	2613700000	1964200000	0
DLFHCVSFIVPR	12	0	1488.75	F6RI47;F6R942	F6RI47	82	93	yes	2;3	2.5185e-52	232.79	9	5	4	11	11	4	15620000000	3785600000	3766400000	2263900000	2793100000	1791700000	1218800000
DLFHCVSFTLPR	12	0	1490.73	F6QAD8;F6R6K3;F6R7S3	F6QAD8	82	93	yes	2;3	0.00026301	121.02	2	1	1	2	2	2	55001000	12411000	12675000	9706000	8973800	7552500	3682700
DLLAVEAVR	9	0	984.56	F6YT40;F6YY39	F6YT40	1244	1252	yes	2	0.002723	120.49	1	1	1	1	1	1	588480000	168190000	112020000	85707000	126860000	70310000	25401000
DLLDIGR	7	0	800.439	F6RMD0	F6RMD0	407	413	yes	2	5.7791e-05	163.34	1	1	1	1	1	1	949180000	212500000	190970000	171650000	171880000	147320000	54856000
DLPSDLLLLK	10	0	1125.66	F7DZ01	F7DZ01	253	262	yes	2	0.012187	89.355	1	1		1	1	1	30579000	8430900	7099400	5984100	5387200	3677000	0
DLQDFEDILHR	11	0	1399.67	F6W2Y1	F6W2Y1	65	75	yes	3	0.017439	43.502				1			7180800	7180800	0	0	0	0	0
DLQFVEVTDVK	11	0	1291.67	F7CN05;F7CN11;F7CS60	F7CN05	911	921	yes	2	0.002481	114.4			1	2	1	1	213990000	83717000	73742000	42831000	0	0	13697000
DLQLSDVFLK	10	0	1176.64	F6YQL3	F6YQL3	331	340	yes	2	8.8697e-05	135.79	1	1		1	1	1	195520000	49689000	38347000	23035000	45238000	39210000	0
DLQTAQR	7	0	830.425	F7BLE3;F7BTW7;F7E454;F7CJG3	F7BTW7	649	655	no	2	0.020196	121.68	1		1	1	1	1	6994400000	1783700000	2237700000	1297500000	1427400000	0	248130000
DLTGFPESLNQNEEDDGDCVNHR	23	0	2660.1	F6RI47;F6R942	F6RI47	626	648	yes	2;3;4	1.673e-80	231.26	4	5	5	5	4	5	5096300000	1098200000	878070000	957300000	972540000	713200000	477010000
DLVMTQSPGSLAASLGQR	18	0	1829.93	F6VJV9	F6VJV9	1	18	yes	2	1.6107e-15	183.79				1			18360000	18360000	0	0	0	0	0
DLYSGLIGPLIVCR	14	0	1574.85	F6PQ46	F6PQ46	888	901	yes	2;3	1.4398e-07	177.78	2	2	2	2	2	2	1926800000	385280000	516930000	370380000	337890000	217220000	99067000
DMENLEDVFFQMLDETR	17	0	2130.92	F6RMD0	F6RMD0	457	473	yes	2;3	4.3843e-16	119.46	1		1				11599000	0	0	0	5563200	0	6035700
DMSGSLASGIPVK	13	0	1260.64	F6XSF7	F6XSF7	398	410	yes	2	0.0010641	130.94	1	1	1	2	1	1	1744200000	427920000	415600000	213600000	361400000	235820000	89803000
DNCCILDER	9	0	1193.48	F6W2Y1	F6W2Y1	32	40	yes	2	0.015897	99.802	1			1			27522000	21553000	0	0	5969400	0	0
DNCPFHYNPAQYDYDR	16	0	2073.83	F6YR34	F6YR34	752	767	yes	3	0.012488	40.856				1	1	1	25183000	9275500	10814000	5093300	0	0	0
DNCPFHYNPAQYDYDRDDVGDR	22	1	2731.1	F6YR34	F6YR34	752	773	yes	4	9.7438e-05	58.093				1	1	1	59200000	23306000	19678000	16216000	0	0	0
DNCQYVYNVDQR	12	0	1572.66	F6YR34	F6YR34	811	822	yes	2	3.6187e-08	156.48				1	1		53207000	23756000	29451000	0	0	0	0
DNDGWTTTDPR	11	0	1276.53	F6PH38	F6PH38	410	420	yes	2	0.031764	66.683	1			1	1	1	56582000	26927000	9642500	1974300	18039000	0	0
DNENVVGEYSSELEK	15	0	1710.76	F6PH38	F6PH38	163	177	yes	2	5.9351e-08	142.83	1	1	1	1	1	1	103820000	44176000	17862000	12460000	19091000	7930300	2297100
DNGCFR	6	0	767.302	F6RI47;F6R942	F6RI47	1080	1085	yes	2	0.034177	119.03	1	1		1	1	1	8447000000	2211800000	2734200000	1214100000	1469700000	817220000	0
DNLDRDIALLK	11	1	1284.7	F7BFJ1	F7BFJ1	458	468	yes	3	0.002728	84.687	1	1	1	1	1	1	115650000	19194000	39832000	19296000	11668000	22108000	3547800
DPAASASNLDMDFR	14	0	1508.66	F7CR03	F7CR03	222	235	yes	2	6.4047e-06	139.86	1	1	1	1	1	2	38606000	12285000	10783000	0	0	10886000	4651900
DPDQTEGLGLAYLSSHIAHVER	22	0	2407.18	Q28372;F7DHZ1;F7E2D1	Q28372	347	368	yes	2;3;4	2.1945e-137	271.19	3	3	1	3	3	3	3405000000	670120000	588790000	752300000	585290000	718640000	89867000
DPEHTLFGSVTR	12	0	1357.66	F7BQD6	F7BQD6	378	389	yes	3	0.018604	47.712	1	1	2	1		2	20404000	4157600	0	5173100	5431700	2423300	3218500
DPNGFPPEVQR	11	0	1254.6	Q28369;F6W135	Q28369	158	168	yes	2	0.02125	68.657					1		0	0	0	0	0	0	0
DPQGEYEEHLGILGPVIR	18	0	2021.02	F7DZ01	F7DZ01	882	899	yes	3	9.8823e-05	59.434	1	1			1	1	46384000	0	8733400	13315000	11211000	13125000	0
DPQTHHYVVALVK	13	0	1505.8	F6PKE1	F6PKE1	95	107	yes	2;3;4	0.00027022	92.939	3	3	3	3	3	3	848040000	283890000	302720000	99622000	61670000	88536000	11598000
DPSASPGDAGEQAIR	15	0	1469.67	F6ZSZ5;F6ZT22;F6ZT60	F6ZSZ5	286	300	yes	2	8.4432e-06	124.42	1			1	1	1	37597000	10063000	9635400	10886000	7013000	0	0
DPVCLSK	7	0	817.4	F6PQ46	F6PQ46	530	536	yes	2	0.019374	122.5	1	1		1	1	1	1630800000	405820000	362520000	233220000	422110000	207140000	0
DPWSSYQTR	9	0	1138.5	F7DTV1	F7DTV1	19	27	yes	2	1.8646e-14	186.3	1	1	1	1	1	1	220930000	33099000	51176000	39430000	35978000	50326000	10920000
DQDSYCLCSNGR	12	0	1473.56	F6QAD8;F6R6K3;F6R7S3	F6QAD8	837	848	yes	2	1.8981e-05	144.47	1	1	1	1	1	1	192320000	35919000	46521000	33385000	27640000	42947000	5909700
DQFNLVCFNEEATQWK	16	0	2027.9	F6R3F4	F6R3F4	307	322	yes	2	1.047e-23	174.9	1	1		1	1	1	79526000	18424000	13812000	15979000	18880000	12431000	0
DQFNLVCFNEEATQWKPSLVPASAENMK	28	1	3252.52	F6R3F4	F6R3F4	307	334	yes	3;4	9.4712e-46	168.79	2	3	3	2	3	2	1750300000	280250000	380050000	268630000	198550000	343040000	279800000
DQQVTEISFSMTEK	14	0	1641.76	F6WPQ1	F6WPQ1	902	915	yes	3	0.043573	20.733	1	1			1	1	284100000	0	85887000	73607000	68781000	55823000	0
DQVLISCDTGYK	12	0	1397.65	F6RPL1	F6RPL1	323	334	yes	2	0.002443	99.283	1	2		1	1		37187000	17912000	7035700	0	8399500	3840100	0
DSALGFLR	8	0	877.466	F6ZEH8;Q9TQV8;P27425	P27425	318	325	no	2	3.653e-09	183.43	4	4	3	4	6	3	13535000000	2383100000	3051100000	2353700000	2498900000	2197500000	1050800000
DSCVGTLVVK	10	0	1076.55	F7BLE3;F7BTW7;F7E454;F7CJG3	F7BTW7	555	564	no	2	0.0014511	115.49	2	2	1	2	2	1	2935700000	812620000	628470000	412310000	408430000	475610000	198260000
DSDGDGIGDVCDNCPQK	17	0	1850.7	Q9BG80;F6U3D3	Q9BG80	395	411	yes	2	0.00033552	67.153	1	1		1		1	31157000	6232300	0	9827000	9380800	5717100	0
DSDGSYFLYSK	11	0	1280.56	H9GZS9	H9GZS9	306	316	yes	2	0.035225	65.347	1			1	1		26998000	7730700	12195000	0	7072500	0	0
DSEFVTFDTPFGK	13	0	1488.68	F6Z129	F6Z129	194	206	yes	2	0.0034097	76.143	1					1	15805000	0	0	5869900	9934900	0	0
DSERPSGIPDR	11	1	1227.58	A0A0A1E417	A0A0A1E417	69	79	yes	2;3	2.3535e-17	194.12	2	2	3	1	1	1	4713900000	778990000	717370000	340170000	2203400000	404950000	269030000
DSERPSGIPGR	11	1	1169.58	F6PNY0	F6PNY0	50	60	yes	2;3	2.5641e-11	177.58	2	2	1	2	2	2	6102700000	380130000	389380000	1818500000	480270000	2680900000	353620000
DSGVPDR	7	0	744.34	A0A0A1E6N5	A0A0A1E6N5	77	83	yes	2	0.01761	124.34	1	1	1	1	1	1	2905200000	768160000	1044900000	392690000	359580000	333800000	6056000
DSITTWEILAVSLSDK	16	0	1776.91	F7BLE3;F7BTW7;F7E454;F7CJG3	F7BTW7	796	811	no	2	1.8889e-07	134.08	1	1	2	3	1	2	188990000	43431000	46099000	28816000	23578000	28002000	19063000
DSITTWEILAVSLSDKK	17	1	1905.01	F7BLE3;F7BTW7;F7E454;F7CJG3	F7BTW7	796	812	no	2;3	1.0532e-05	80.609	3	1	1	5	6	4	75219000	25322000	21254000	17939000	8136100	938040	1629300
DSLDKEK	7	1	833.413	F6PQ46	F6PQ46	202	208	yes	2	5.9337e-06	172.03	1	1		1	1	1	4399800000	829500000	813940000	606770000	1249200000	900380000	0
DSLDQVVGGVPVTLNAQTVDVNQETSDLESK	31	0	3256.59	F7D7B5	F7D7B5	349	379	yes	3	1.7934e-22	115.06			1				28570000	0	0	0	0	0	28570000
DSLQVSTPLR	10	0	1114.6	F6Z352	F6Z352	555	564	yes	2	2.2705e-05	145.16	1	1			1	1	290450000	0	106340000	56965000	89705000	37437000	0
DSMIWDCTCIGAGR	14	0	1640.67	F7CN05;F7CN11;F7CS60	F7CN05	116	129	yes	2	0.0001265	129.16	1	1	1	1	1	1	185430000	45972000	48396000	60379000	10451000	9240800	10992000
DSQDEEK	7	0	849.335	Q28372;F7DHZ1;F7E2D1;Q6X9X6	Q28372	663	669	yes	2	0.052332	95.793			1				11118000	0	0	0	0	0	11118000
DSQDEEKTEALTSAK	15	1	1650.76	Q28372;F7DHZ1;F7E2D1;Q6X9X6	Q28372	663	677	yes	2;3	8.712e-113	272.59	2	2	1	1	1	2	1823300000	247860000	328740000	370630000	101830000	711710000	62494000
DSSTWLTAFVLK	12	0	1366.71	F6XSF7	F6XSF7	1079	1090	yes	2	0.0021881	129.38	1	1		1	1	1	660710000	216360000	167490000	101650000	87119000	88104000	0
DSTALHFLGR	10	0	1115.57	F6W4R2	F6W4R2	468	477	yes	2;3	5.8347e-19	196.95	2	2	2	2	2	2	641890000	125280000	126560000	94983000	151710000	93863000	49503000
DSTEFR	6	0	753.329	F7E2N9	F7E2N9	250	255	yes	2	0.037678	116		1		1	1	1	133590000	35431000	38279000	33799000	0	26084000	0
DSTFTPVPIQAK	12	0	1302.68	F6W4R2	F6W4R2	66	77	yes	2	0.017537	67.081	1	1					386800000	0	0	0	217650000	169150000	0
DSVTGTLPR	9	0	944.493	F6PR90	F6PR90	81	89	yes	2	0.00044458	144.38		1	1	1	2	1	67430000	15687000	15702000	14564000	0	14078000	7398100
DSYVGDEAQSK	11	0	1197.52	F6T3Y8;F6ZGE4;F7AAK7;F7CZ92;F7CW82;F6R1X9;F6Z8K0;P60708	F7CZ92	53	63	no	2	8.2519e-09	164.46	1	1		1	1	1	662650000	143320000	208690000	132070000	131230000	47346000	0
DTANLFPQTTLTLSMQPDTEGTFDVECLTTDHYTGGMK	38	0	4234.9	F6PQ46	F6PQ46	672	709	yes	3	0.051233	14.424			1				26966000	0	0	0	0	0	26966000
DTDSEEEIR	9	0	1092.46	K9KG63;K9K252;F6Z5C4;L7MRJ5;F7BJZ4;F6TZ87	K9KG63	18	26	yes	2	0.0021758	121.62	1					1	15280000	0	0	7570200	7710100	0	0
DTDTGALLFIGK	12	0	1249.66	F7BKE1;B8K250	F7BKE1	399	410	yes	2	0.00073088	127.94	1	1	1				335730000	0	0	0	206970000	89683000	39072000
DTEGLRQELNK	11	1	1301.66	F6Z2L5	F6Z2L5	101	111	yes	2;3	4.3293e-45	267.49	2	2	2	2	2	2	7194200000	1476500000	2570800000	896610000	743340000	1318300000	188710000
DTEGLRQELNKDLELVK	17	2	1999.06	F6Z2L5	F6Z2L5	101	117	yes	2;3;4	1.5061e-62	182.31	1	3	1	1	2	3	361290000	45905000	99666000	60927000	40119000	84017000	30654000
DTEQADQIDPR	11	0	1286.57	F6X667	F6X667	203	213	yes	2	2.814e-05	144.77	1	1		1	1	1	158320000	34272000	40608000	31225000	27135000	25080000	0
DTGCDQFTGCPVGQTCCPSLSGR	23	0	2559.02	F7AB03;F7AS83	F7AB03	440	462	yes	7	0.06435	3.0985					1		45216000	0	45216000	0	0	0	0
DTHKSEIAHR	10	1	1192.59	F7BAY6;Q5XLE4;P35747	F7BAY6	25	34	no	2;3	3.0474e-25	188.38	2	3	2	2	2	2	920100000	114990000	155970000	193500000	143100000	267240000	45297000
DTIIKPLLVEPEGLEK	16	1	1793.02	F6RI47;F6R942	F6RI47	901	916	yes	2;3	2.282e-12	197.38	2	2	2	2	2	2	63347000000	11515000000	9950400000	9613000000	12019000000	11122000000	9128100000
DTLMISR	7	0	834.427	H9GZU8	H9GZU8	124	130	yes	2	7.2583e-08	172.39	2	3	2	3	3	3	9289000000	2258400000	4048000000	352070000	1057100000	617190000	956290000
DTLMITRTPEVTCVVVDVSQENPDVKFNWYMDGVEVR	37	2	4341.08	Q95M34;H9GZQ9	Q95M34	137	173	yes	6	0.043727	24.039					1		9115800	0	9115800	0	0	0	0
DTLTSMQESQVAQQAR	16	0	1791.84	P0DN28	P0DN28	43	58	yes	2;3	1.1639e-112	267.85	4	3	3	5	4	3	10039000000	3018000000	3312500000	942610000	1759500000	650750000	355460000
DTQLHLDDALR	11	0	1295.65	Q8MJV1;F6QLB5;F6UP52;Q8MJV0;F6R839;F6SUC3	Q8MJV0	1655	1665	no	3	0.00067348	72.652					1		24059000	0	24059000	0	0	0	0
DTQNLLK	7	0	830.45	F6RI47;F6R942	F6RI47	965	971	yes	2	0.01364	128.48	1	1		1	1		8654400000	2094100000	2572800000	0	2154200000	1833200000	0
DTSLGLAR	8	0	831.445	F7BTW7;F7E454;F7CJG3	F7BTW7	740	747	yes	2	0.0056455	126.24	1	1	1		1		905000000	0	331950000	0	275340000	245080000	52639000
DTVHIQDTTGK	11	0	1213.59	F6W2Y1	F6W2Y1	167	177	yes	2	3.2618e-06	123.86	1			1			0	0	0	0	0	0	0
DTVVKPLLVELEGIEK	16	1	1781.02	F6REX3	F6REX3	906	921	yes	2;3	3.3653e-82	191.96	2	2	2	2	2	2	390710000	66498000	63340000	68236000	99733000	66786000	26116000
DTVVKPLLVELEGIEKEETFNTLLCASETGVPEK	34	2	3786.95	F6REX3	F6REX3	906	939	yes	3;4	1.0231e-79	181.18		2	1	1	2	2	453330000	73058000	119330000	122810000	0	98285000	39845000
DVDECTTQPSICGTAVCK	18	0	2039.86	F6Z352	F6Z352	175	192	yes	2;3	0.001821	73.848	1	1	1	1	1	1	106010000	20148000	26608000	18872000	26102000	11592000	2687500
DVDIDSYPDEELPCSAR	17	0	1979.84	F7E0P3	F7E0P3	435	451	yes	2	8.525e-08	105.17	1		1	1	1	1	64144000	18170000	15825000	14288000	11644000	0	4216300
DVFLEMNIPYSVVR	14	0	1680.85	F7D7B5	F7D7B5	794	807	yes	2	0.00063976	108.7		1		1	1	1	26025000	9242400	6165800	5397500	0	5218900	0
DVFLGTFLYEYSR	13	0	1608.78	F7BAY6;Q5XLE4;P35747	F7BAY6	347	359	no	2;3	5.0847e-59	285.79	3	4	8	10	2	8	17669000000	3019400000	2807700000	2471800000	2027500000	3008600000	4333700000
DVLLNGVQPSR	11	0	1196.65	F7BLE3;F7BTW7;F7E454;F7CJG3	F7BTW7	304	314	no	2;3	2.335e-18	190.24	1	1	1	2	2	1	3003100000	821670000	800580000	351190000	461420000	449530000	118710000
DVLMISR	7	0	832.448	H9GZT5	H9GZT5	135	141	yes	2	0.0011886	154.11	5	4	3	4	6	5	74251000000	14750000000	15386000000	12805000000	13192000000	11492000000	6626300000
DVLMITR	7	0	846.463	H9GZS9	H9GZS9	154	160	yes	2	0.013738	128.38	1	1	1	1	1	1	3021400000	758840000	725220000	552680000	315250000	446960000	222460000
DVMEVINSLDNIHYK	15	0	1788.87	F6PPQ0	F6PPQ0	309	323	yes	2;3	1.1057e-08	163.34	2	2	1	2	2	2	694380000	171650000	156790000	85636000	131260000	131540000	17501000
DVVEITCK	8	0	962.474	F7BQD6	F7BQD6	321	328	yes	1;2	0.027791	127.56	2	1	1	2	2	2	256500000	71094000	55469000	44084000	44518000	25397000	15935000
DVVLTTTFLDDIK	13	0	1478.79	P48770;F6UFT2	P48770	312	324	yes	2	0.0035254	79.82	1	1		1	1	1	150870000	32702000	22815000	22152000	45384000	27815000	0
DWVNDGLSSLK	11	0	1232.6	P0DN28;F6ZG95	P0DN28	59	69	yes	2	0.00053651	131.44	2	1	1	2	2	2	4090100000	863950000	563780000	1051400000	757150000	457460000	396320000
DYAGVFMDAGLALK	14	0	1469.72	F7BLE3;F7BTW7;F7E454;F7CJG3	F7BTW7	632	645	no	2	0.00022204	116.55	6	6	4	25	2	2	227600000	5751000	44788000	34956000	47758000	43476000	50868000
DYAQVGR	7	0	807.388	F6XWM5	F6XWM5	211	217	yes	2	0.0066813	137.5	1	1	1	1	1	1	28722000000	6895300000	6651700000	4434800000	5094400000	3503000000	2142400000
DYFMPCPGR	9	0	1141.47	F6X1I8	F6X1I8	228	236	yes	2	0.00041265	148.07	1	1	2	1	2	1	4935900000	988050000	1183900000	686650000	1060600000	635620000	381080000
DYIFGNYIER	10	0	1288.61	F7AVY0;F7AE68	F7AVY0	547	556	yes	2	2.7539e-08	168.27	1	1	1	1	1	1	621120000	137460000	74021000	122840000	121560000	127210000	38041000
DYSLFSYATK	10	0	1193.56	F6PZG1	F6PZG1	65	74	yes	1	4.4014e-12	182.65				1			7882600	7882600	0	0	0	0	0
EACFAEEGPK	10	0	1136.48	F7BAY6;Q5XLE4;P35747	F7BAY6	588	597	no	1;2	2.132e-08	169.12	5	3	2	4	2	5	76360000000	15343000000	13764000000	12544000000	18857000000	10381000000	5471800000
EAEELK	6	0	717.354	F7BLE3;F7BTW7;F7E454;F7CJG3	F7BTW7	855	860	no	2	0.035872	117.56	1	1		1	1	1	4926100000	834130000	1028100000	1036400000	1079700000	947710000	0
EAFLLFDR	8	0	1009.52	F6ZGD1	F6ZGD1	6	13	yes	2	0.0014899	135.77					1		9712900	0	9712900	0	0	0	0
EAFTMIGHK	9	0	1032.51	F6UHF2;F6ZR63;F7E3H8	F6ZR63	721	729	no	2	0.011164	105.57	1	1	1	2	1	1	3230700000	720480000	611480000	546910000	686350000	642190000	23300000
EALIQFLEQVHQGIK	15	0	1751.96	F6WZA8	F6WZA8	319	333	yes	3	8.8209e-07	128.9	1	1	1	1	1	1	196000000	42117000	48123000	31808000	20543000	33744000	19662000
EALKLEK	7	1	829.491	F7BTW7;F7E454;F7CJG3	F7BTW7	1593	1599	yes	2	0.0032365	159.2		1				1	224190000	0	0	116310000	0	107890000	0
EAPGESEAGGLMEEVR	16	0	1659.74	F6WE78	F6WE78	278	293	yes	2	0.0013104	66.498		1			1	1	17747000	0	5592900	8348000	0	3806400	0
EAPHCVPVCGR	11	0	1280.58	F7A1L2	F7A1L2	220	230	yes	3	0.026848	39.266	1	1		1		1	47228000	11618000	0	13419000	12130000	10061000	0
EAQFNSTYR	9	0	1114.5	H9GZS6;H9GZR2	H9GZS6	182	190	yes	2	1.1873e-14	190.26	1	1		1	1	1	171860000	66302000	32499000	34287000	28441000	10332000	0
EAQLPVIENK	10	0	1139.62	F6USP9;P80010	F6USP9	725	734	yes	2	5.5511e-06	152.79	1	1	1	1	1	1	1870200000	441080000	495960000	312320000	316600000	235940000	68287000
EAQQYSEALASTR	13	0	1452.68	F6RMQ1	F6RMQ1	35	47	yes	2	0.0032639	76.655				1	1		19780000	8852600	10927000	0	0	0	0
EATFNSLLCPSDAEVSDQLSLK	22	0	2423.15	F6RI47;F6R942	F6RI47	917	938	yes	2;3	6.1945e-100	239.51	14	15	20	10	9	13	16791000000	2934700000	2540900000	2665000000	3358600000	3408300000	1883700000
EATIPGHLNSYTIK	14	0	1542.8	F7CN05;F7CN11;F7CS60	F7CN05	655	668	yes	2;3	0.00045709	110.84	2	2	2	2	2	2	873020000	330460000	238060000	218020000	36285000	34223000	15967000
EAVEHLQK	8	0	952.498	F6RZ27	F6RZ27	44	51	yes	2	0.0018206	133.81	1	1		1		1	300910000	82017000	0	58051000	62315000	98523000	0
EAVKEEDSIHWQR	13	1	1625.78	F6REX3	F6REX3	1181	1193	yes	3	0.0024968	73.881		1			1		13284000	0	7749400	0	0	5534700	0
EAVKEEDSIHWQRPGK	16	2	1907.95	F6REX3	F6REX3	1181	1196	yes	3;4;5	1.132e-05	115.82	2			3	3	1	334960000	164270000	71296000	42940000	56458000	0	0
EAVMNINKPENLFK	14	1	1645.85	F6Z352	F6Z352	376	389	yes	2;3	0.00028016	83.877	2	1		2	2	2	170370000	42912000	42788000	40587000	29409000	14675000	0
ECCHGDLLECADDR	14	0	1748.66	F7BAY6;Q5XLE4;P35747	F7BAY6	267	280	no	2;3	3.0027e-107	311.02	56	58	49	48	53	71	57056000000	19896000000	7564600000	9436800000	10364000000	7294600000	2499600000
ECCHGDLLECADDRADLAK	19	1	2246.94	F7BAY6;P35747	F7BAY6	267	285	no	3;4	6.4821e-06	96.096	2	1	2	2		2	118970000	45962000	0	23086000	29625000	13253000	7047000
ECCHGDLLECADDRADLTK	19	1	2276.95	Q5XLE4	Q5XLE4	267	285	yes	2;3;4	1.5784e-259	420.87	8	10	9	11	13	10	19347000000	5507500000	5599400000	3251300000	1719100000	2838700000	430600000
ECDADGWTNDIPLCEVVK	18	0	2119.92	F6ZR63	F6ZR63	128	145	yes	2	2.8064e-38	239.87	1	1	1	1	1	1	1534900000	314750000	216030000	318330000	329180000	231930000	124710000
ECEEVIR	7	0	933.423	F6PH38	F6PH38	239	245	yes	2	0.04859	97.473				1	1		84165000	57887000	26278000	0	0	0	0
ECEHVQNLGK	10	0	1212.56	F7B3I5	F7B3I5	415	424	yes	2;3	6.6305e-25	201.07	2	2	2	2	2	2	1041400000	217600000	225500000	189330000	239160000	136640000	33168000
ECEPNNHER	9	0	1183.47	F6ZEH8;Q9N1F7;Q7JJ09;O97977;Q7JJ05;Q71UC7;O97978;P27425	P27425	532	540	no	1;2;3	1.6589e-14	214.23	3	2	2	3	3	3	66320000000	10007000000	11093000000	13055000000	15283000000	15155000000	1727900000
ECHLALVPSHAIVAR	15	0	1671.89	F6PKE1	F6PKE1	252	266	yes	2;3;4	1.3956e-06	125.61	3	5	2	5	5	4	1097900000	347890000	233000000	164920000	194880000	141010000	16224000
ECLQTCR	7	0	965.406	F6UZH0;P04365	F6UZH0	276	282	yes	2	0.00014324	159.19		1	1	1	1	1	7124700000	1356700000	2238200000	1646900000	0	1668600000	214340000
ECNNPAPQNGGASCPGR	17	0	1784.73	F7CFN5	F7CFN5	525	541	yes	2	0.00046294	63.091		1		1	1		27580000	14589000	0	0	0	12992000	0
ECQDDGVWSGTEPICR	16	0	1907.78	F6PPQ0	F6PPQ0	184	199	yes	2;3	7.8285e-17	166.14	1	2	1	1	1	2	306210000	88536000	72626000	44231000	47128000	42722000	10966000
ECVGFGAVQEVPVGLVQPASATLYDYYNPEHK	32	0	3536.69	F6XSF7	F6XSF7	1540	1571	yes	3	4.7434e-13	90.299	1	1	1	1	1	1	228430000	50459000	36721000	21761000	29480000	45169000	44839000
EDADFQESNK	10	0	1181.48	F6PQ46	F6PQ46	609	618	yes	2	0.0052494	97.635	1	1	2	1		1	76296000	18244000	0	21566000	14403000	15797000	6285900
EDAISAAFR	9	0	978.477	F6SKT2;B8K277;A2Q0Z2;Q865A5	F6SKT2	176	184	yes	2	8.5729e-05	157.34	1	1	1	1	1	1	123280000	22261000	21744000	24575000	34077000	13616000	7004200
EDDLETDFYK	10	0	1273.54	F6YQL3	F6YQL3	247	256	yes	2	0.00086158	122.52	1	1		1	1	1	95860000	19436000	19684000	13020000	21564000	22155000	0
EDDLPSDLPALAADFAEDK	19	0	2030.93	F7BAY6;Q5XLE4;P35747	F7BAY6	318	336	no	2;3	2.1615e-29	177.36	16	5	5	6	10	9	38864000000	9537100000	5732400000	8763200000	1685200000	1345500000	11801000000
EDDLPSDLPALAADFAEDKEICK	23	1	2561.18	F7BAY6;Q5XLE4;P35747	F7BAY6	318	340	no	2;3;4	1.6931e-29	188.59	4	5	4	3	5	4	76277000000	1522800000	18004000000	18039000000	1578800000	20672000000	16460000000
EDEMCWNYHGGFR	13	0	1699.65	F6T0M8;F6PVG3	F6T0M8	343	355	yes	3	0.0066666	42.809					1	1	5691100	0	5691100	0	0	0	0
EDFLEQSEQLFGAK	14	0	1639.77	F6X449	F6X449	176	189	yes	2	1.0642e-28	187.97	1	1	2	1	1	1	275400000	47869000	46094000	50757000	73093000	37092000	20497000
EDIRPEVPKDECK	13	2	1613.77	F6ZEH8;Q9TQV8;P27425	P27425	349	361	no	2;3;4	1.1248e-19	199.03	3	4	4	4	4	5	22533000000	5271600000	4402300000	4377200000	4429400000	2589400000	1463500000
EDLIWGLLNQAQEHFGTEK	19	0	2227.09	F6ZEH8;Q9TQV8;P27425	P27425	281	299	no	2;3;4	4.7563e-164	295.83	8	6	1	4	2	4	5597200000	482240000	395210000	1673100000	470470000	2248600000	327630000
EDLKDDQK	8	1	989.467	F7D7B5	F7D7B5	245	252	yes	2	2.2032e-26	214.64	1	1	1	1	1	1	513260000	0	71201000	126600000	176730000	110300000	28434000
EDNSVHWTR	9	0	1142.51	F6RI47;F6R942	F6RI47	1181	1189	yes	2;3	2.8551e-05	131.06	3	3	4	2	2	2	3499600000	575780000	723990000	737400000	775400000	451480000	235570000
EDNSVHWTRPQK	12	1	1495.72	F6RI47;F6R942	F6RI47	1181	1192	yes	2;3;4	1.113e-39	221.32	4	4		3	3	4	1682200000	441320000	385630000	315300000	396310000	143680000	0
EDNSVHWTRPQKPK	14	2	1720.86	F6RI47;F6R942	F6RI47	1181	1194	yes	2;3;4	5.2537e-119	273.24	7	6	4	7	7	8	15486000000	2304900000	6873100000	1787000000	1625900000	2696600000	198990000
EDPQYLLDSNSWIEEMPSER	20	0	2437.07	F6XSF7	F6XSF7	1703	1722	yes	2;3	2.8137e-46	249.3	3	2	2	2	2	2	1437900000	277080000	244220000	216060000	320440000	271140000	109000000
EDSACIPWAYYSTVDQVK	18	0	2130.96	F6PQ46	F6PQ46	870	887	yes	2;3	1.3498e-12	141.34	2	2	2	2	2	2	2266600000	376020000	335150000	395760000	419570000	404520000	335620000
EDSCQLDHAEGPCLGMISR	19	0	2173.92	F6UZH0	F6UZH0	228	246	yes	2;3	5.1574e-13	141.85	2	2	2	2	2	2	2435800000	500180000	433200000	422550000	473180000	436060000	170660000
EDSKPVDPQWR	11	1	1355.65	F7BM31	F7BM31	32	42	yes	3	0.034627	58.37	1	1	1	1	1	1	1257700000	204800000	216680000	259140000	233390000	304280000	39362000
EDVYNVGTVLK	11	0	1235.64	F7BNQ2	F7BNQ2	327	337	yes	2	4.4356e-06	146.69	1	1	1	1	1	1	2610800000	646450000	630890000	418220000	464220000	338120000	112920000
EEDSIHWQR	9	0	1198.54	F6REX3	F6REX3	1185	1193	yes	3	0.042122	51.066	1			1	1		59228000	22190000	14426000	0	22612000	0	0
EEDSIHWQRPGK	12	1	1480.71	F6REX3	F6REX3	1185	1196	yes	2;3;4	8.5719e-11	166.52	2	3		3	3	2	485320000	81588000	90331000	117470000	70474000	125460000	0
EEEIAALVIDNGSGMCK	17	0	1834.84	F7AAK7	F7AAK7	2	18	yes	2	5.7218e-12	171.05	1			1	1	1	35277000	10202000	10767000	6766300	7541700	0	0
EEGTGLELTGHGSCEITNTLSK	22	0	2332.09	F6REX3	F6REX3	326	347	yes	3	0.030396	25.257	1	1	1	1	1	1	66857000	15001000	17543000	10630000	12859000	8650200	2174000
EEILTADMDAER	12	0	1391.62	F7APU2;F7AU56	F7APU2	280	291	yes	2	5.7303e-12	163.64	3	3	3	4	3	5	702050000	120170000	82760000	156400000	138630000	167060000	37030000
EELLVCPVTWDHLGFQAPNLEDR	23	0	2737.32	F6QFD9	F6QFD9	440	462	yes	3	1.0434e-29	153.83	1	1		1		1	115700000	30947000	0	24654000	29829000	30271000	0
EELTAVMSFLTQQLGPGLVDAAQAR	25	0	2644.35	F6T7X3	F6T7X3	66	90	yes	3	2.3807e-05	71.54	1	1		1	1	1	85477000	18514000	11316000	29254000	10841000	15552000	0
EEQEDPYLNDR	11	0	1406.6	F7ABC9	F7ABC9	150	160	yes	2	0.0063196	85.377	1	1	1	1	1	1	103370000	25389000	17442000	19416000	23107000	15135000	2877300
EEQFNSTYR	9	0	1172.51	H9GZU9;Q95M34;H9GZQ9	H9GZU9	170	178	no	2	1.8468e-09	178.83	1	1	1	1	1	1	761740000	145380000	189760000	211430000	104400000	95001000	15775000
EESPPLVGQQSTVSDVPR	18	0	1923.95	F7CN05;F7CN11;F7CS60	F7CN05	1434	1451	yes	2;3	9.0628e-29	222.79	2	2	1	2	2	2	685890000	227830000	173540000	188660000	30477000	44022000	21364000
EESQDKPLALPDQEPALGPLEN	22	1	2389.16	F6RZ27	F6RZ27	360	381	yes	2;3	1.4451e-11	118.87	2	2	1	2	2	2	426980000	62155000	54429000	84118000	84078000	99486000	42714000
EEVPAADLSDQVPDTESETK	20	0	2158.98	F7BTW7;F7E454;F7CJG3	F7BTW7	959	978	yes	2;3	1.4646e-45	192.46	2	2	2	2	2	2	5340100000	1073200000	1398100000	979180000	716420000	838150000	335000000
EEYLIQR	7	0	949.487	F6UHF2;F6ZR63	F6ZR63	839	845	no	2	3.9358e-05	166.13		1	1			1	1017600000	0	0	504630000	0	390440000	122560000
EFCDLPLCGSETQPR	15	0	1807.79	F7BK76	F7BK76	261	275	yes	2	0.0008754	70.942			1	1			13368000	10801000	0	0	0	0	2566500
EFDDFSLSDALS	12	0	1344.57	F7C0D9;F7C0Z0	F7C0D9	634	645	yes	2	0.018781	66.351	1	1	1	1	1	1	159430000	40179000	21017000	22730000	32522000	25870000	17109000
EFEELYSNPQNPEK	14	0	1722.77	F6PUW3	F6PUW3	1399	1412	yes	2	0.012397	69.979	1			2	1	1	106340000	30969000	25343000	22092000	27934000	0	0
EFPEPHLGR	9	0	1080.54	F6UEG9	F6UEG9	38	46	yes	3	0.015239	60.91	1	2		1	1	1	30993000	8701500	9419000	0	7365200	5507700	0
EFTRPEEIIFLR	12	1	1548.83	F7ABC9	F7ABC9	589	600	yes	3	2.8116e-12	165.35	1	1		1	1	1	148560000	46103000	31747000	25275000	25144000	20293000	0
EFTSLGK	7	0	780.402	F6T0P6	F6T0P6	31	37	yes	1	5.8158e-05	167.82	1	1	1	1	1	1	796440000	142000000	197690000	137690000	137820000	159800000	21432000
EGAMVLQR	8	0	902.464	F7C0D2	F7C0D2	45	52	yes	2	0.023388	108.24	1	1			1	1	51282000	0	13851000	15999000	10439000	10993000	0
EGCAPGYR	8	0	908.381	F6ZEH8;Q9N1F7;Q7JJ09;O97977;P27425	P27425	506	513	no	2	0.0075158	122.54	1	1	2	1	1	1	27277000000	4331000000	4718200000	6355800000	5673800000	5546400000	652150000
EGDCPVGSGK	10	0	1004.42	F7C0D9;F7C0Z0	F7C0D9	79	88	yes	2	0.015389	85.862	1	1	1	1	1	1	7029100000	782170000	2788000000	1023200000	1164100000	1087000000	184620000
EGFGYLSPTGTTEFWLGNEK	20	0	2232.04	F6W2Y1	F6W2Y1	239	258	yes	2	0.001252	80.632	1			1		1	31153000	16862000	0	6966600	7323600	0	0
EGGALVDTLK	10	0	1001.54	F6YCW8;F6YE73;F6Z5E1	F6YCW8	984	993	yes	2	0.0012195	118.18	1	1		1	1	1	274480000	63925000	94208000	41031000	51726000	23593000	0
EGGQTAPASTR	11	0	1073.51	Q28372;F7DHZ1;F7E2D1	Q28372	503	513	yes	2	2.4817e-09	169.77	1	1	1	1	1	1	4604200000	715970000	727730000	946480000	863840000	899610000	450570000
EGHWGAVCDDGWDIK	15	0	1743.73	F7BXD8	F7BXD8	26	40	yes	2;3	6.8797e-06	77.744		2			2	2	95873000	0	30445000	45031000	0	20397000	0
EGICAIGGTSEQSSVGTQHSYSEEEK	26	0	2769.2	F6WA57;K9KEC7	F6WA57	99	124	yes	3	0.028881	24.831	1	1		1	1	1	53417000	19596000	8947100	10556000	6805200	7513300	0
EGIPDAR	7	0	756.377	F7BLE3;F7BTW7;F7E454;F7CJG3	F7BTW7	427	433	no	2	0.013738	128.38	2		1	1	1	1	1269400000	295440000	333010000	244680000	275970000	0	120250000
EGLACEHMK	9	0	1073.46	F7CFN5	F7CFN5	488	496	yes	2;3	0.01572	102.51	2	2	2	1	1	2	523030000	55877000	90354000	150510000	91328000	121380000	13585000
EGPAQSPGEDAR	12	0	1212.54	F6WZ69	F6WZ69	280	291	yes	2	0.010087	71.451	1	1		1		1	16837000	3723800	0	6344600	6768900	0	0
EGPHGSHVYTK	11	0	1210.57	F6RI47;F6R942	F6RI47	1141	1151	yes	2;3	6.4593e-09	197.79	2	2	3	2	2	2	35166000000	6309200000	5601200000	7058100000	7665400000	6114100000	2418200000
EGQMEWVEGAMSSK	14	0	1567.66	F6ZRF6	F6ZRF6	273	286	yes	2	0.00044627	106.01	1	1		1	1	1	202230000	58056000	61801000	41848000	24656000	15871000	0
EGSHTFQGLFGCELR	15	0	1736.79	F7CAB8	F7CAB8	112	126	yes	2;3	1.2855e-23	178.95	2	2	2	2	3	2	1264800000	221320000	227360000	239810000	232580000	224340000	119360000
EGTQATYK	8	0	896.424	F6ZR63	F6ZR63	44	51	yes	2	0.032482	98.997	1			1	1	1	1579700000	307820000	359270000	534220000	378430000	0	0
EHFQNWLK	8	0	1100.54	F6QXN5	F6QXN5	55	62	yes	3	0.04077	50.127					1		10286000	0	10286000	0	0	0	0
EHLQDMGLVDLFNPEK	16	0	1883.91	F7CYR1	F7CYR1	366	381	yes	2;3	1.1629e-149	338.61	4	4	4	4	3	4	5208800000	898720000	920020000	803270000	1139200000	949750000	497770000
EHSSLAFWK	9	0	1103.54	F6Z041	F6Z041	328	336	yes	2;3	1.0169e-05	167.9	7	4	3	11	11	4	3950400000	893420000	1059500000	608630000	681930000	556000000	150920000
EIIIHPNYK	9	0	1125.62	F6PR90	F6PR90	468	476	yes	2;3	0.020836	95.541	2	1		2	2	2	78417000	23017000	18194000	14381000	13717000	9107800	0
EINLAPDSTSVVVSGLMVATK	21	0	2130.12	F7CN05;F7CN11;F7CS60	F7CN05	1676	1696	yes	2;3	3.4571e-12	116.78			2	1	1	1	295530000	104480000	77030000	76660000	0	0	37351000
EINSWVESQTEGK	13	0	1505.7	F6VP61;B8K249	F6VP61	153	165	yes	2	0.0017816	81.865						1	8275700	0	0	8275700	0	0	0
EIPAWVALDPAAR	13	0	1407.75	F7CAB8	F7CAB8	150	162	yes	2;3	0.00010589	131.46	2	2	2	2	2	2	1306800000	257910000	228870000	214600000	272220000	287970000	45242000
EISVSWLR	8	0	988.534	H9GZN9	H9GZN9	140	147	yes	1;2	3.1355e-05	162.31	4	4	5	5	5	5	10969000000	2665000000	2460800000	1687500000	2022500000	1346200000	787390000
EITALAPSTMK	11	0	1160.61	F6T3Y8;F7A5E3;K9KF76;F7AAK7;F7CZ92;F7CW82;F6R1X9;F6Z8K0;K9K3B5;K7THJ6;P60708	F7CZ92	318	328	no	2	0.0022416	117.01	1	1	1	1	1	1	430670000	107160000	129550000	68619000	48697000	66887000	9764200
EKEAIVTVK	9	1	1015.59	F6REX3	F6REX3	1281	1289	yes	2	0.024014	98.033				1			0	0	0	0	0	0	0
EKGEIQNTLQK	11	1	1286.68	F6PR90	F6PR90	527	537	yes	2;3	1.6142e-11	180.19	2	2	1	2	2	2	525630000	115740000	99216000	86438000	101650000	114700000	7887100
EKLPDSSYQSINIPVTQNMVPSAR	24	1	2673.34	F7D7B5	F7D7B5	488	511	yes	3	1.0202e-05	85.573	1	1	1	1	1	1	271380000	48634000	73113000	41748000	38643000	52552000	16692000
EKQDNSTYR	9	1	1139.52	H9GZU8	H9GZU8	168	176	yes	2;3	4.0722e-20	199.29	2	2		2	2	2	1564400000	301310000	525180000	191290000	260620000	286030000	0
EKVPVGER	8	1	912.503	F6XWM5	F6XWM5	194	201	yes	2	0.030037	139.31	1	1		1	1	1	11129000000	2784200000	1692600000	2164500000	2390200000	2097600000	0
ELFLDGNSIK	10	0	1134.59	F6QFD9	F6QFD9	221	230	yes	2	0.015075	86.205			1		1		98486000	0	79149000	0	0	0	19337000
ELGCGEAR	8	0	890.392	F7BXD8	F7BXD8	48	55	yes	2	0.0062702	125.01	1	1		1	1	1	3555500000	981570000	701840000	536690000	794980000	540410000	0
ELGPEQLTHHLQEVGHAAPPSPPLTR	26	0	2810.45	F6QYS3	F6QYS3	32	57	yes	4	0.00047848	42.806	1	2	1	2	1	1	125820000	32459000	29158000	21696000	17232000	19007000	6264400
ELGSPHGISLETVDAAFMCPGSSR	24	0	2517.16	F6X1I8	F6X1I8	348	371	yes	2;3;4	9.0202e-191	383.36	7	7	6	5	6	7	11413000000	1922300000	2104200000	2124200000	2041200000	2123000000	1098200000
ELISER	6	0	745.397	F6X1I8	F6X1I8	86	91	yes	2	0.027367	137.5	1	1		1	1	1	3552800000	1005700000	842890000	419630000	951080000	333560000	0
ELLAPQVVLAR	11	0	1207.73	F6V3X9	F6V3X9	817	827	yes	2	0.04409	55.503				1	1	1	15982000	5500700	4325400	6156300	0	0	0
ELLASVTAPNK	11	0	1141.63	F7BKE1;B8K250	F7BKE1	124	134	yes	1;2	7.4385e-05	141.02	2	2	1	2	2	2	709440000	188370000	177300000	117860000	108410000	96540000	20967000
ELLDSYIDGR	10	0	1179.58	F7BFJ1	F7BFJ1	355	364	yes	2	5.7136e-25	202.28	1	2	2	1	1	1	638410000	44260000	53021000	26556000	65774000	333590000	115220000
ELMEPLVTK	9	0	1058.57	F6RFD7	F6RFD7	56	64	yes	2	0.0099816	107.01	1	1	1	1	1	1	976640000	199520000	295550000	155860000	192310000	96377000	37010000
ELNELGSK	8	0	888.455	F6PPQ0	F6PPQ0	416	423	yes	2	0.0015352	134.81	1	1		1	1	1	644710000	180270000	125270000	91024000	173730000	74410000	0
ELPCGQTQTVQVHYILNGQVLQELK	25	0	2894.5	F6RI47;F6R942	F6RI47	467	491	yes	3	5.7315e-07	91.733	3	7	6	8	3	6	1174600000	326540000	160920000	230200000	156520000	232490000	67904000
ELPCGQTQTVQVHYILNGQVLQELKELVFYYLMMAK	36	1	4283.18	F6RI47;F6R942	F6RI47	467	502	yes	3;4;5	3.6451e-16	74.846			3				313440000	0	0	0	0	0	313440000
ELPEYSLK	8	0	977.507	F6T0P6	F6T0P6	277	284	yes	2	0.040753	94.662	1	1	1	1	1	1	4416100000	790080000	959760000	800960000	993180000	648890000	223280000
ELPSEVFSQLFR	12	0	1450.75	F6QFD9	F6QFD9	231	242	yes	2	9.956e-52	226.47	1	1	1	1	1	1	496890000	111300000	165480000	58796000	51900000	76976000	32436000
ELSSFIGK	8	0	879.47	F6T0P6	F6T0P6	395	402	yes	1	0.04968	80.229	1	1	1	1	1	1	809710000	169590000	181400000	138560000	166510000	132150000	21489000
ELSYESLEDINDK	13	0	1553.71	F7D7B5	F7D7B5	281	293	yes	2	4.9859e-05	133.89	1	1	1	1	1	1	769380000	154220000	200380000	125500000	150450000	109660000	29167000
ELSYLPSLYDYSAYR	15	0	1838.87	F6Q7J3	F6Q7J3	278	292	yes	2	7.5005e-24	181.32	1	1	1	1	1	1	228800000	43629000	48567000	40356000	39187000	40051000	17011000
ELTQAGQETVVTGWGYR	17	0	1893.92	F6X667;Q28380	F6X667	331	347	yes	2	5.0015e-05	124.12				1	1		19718000	19718000	0	0	0	0	0
ELTSLLEDVSSK	12	0	1319.68	F7B3I5	F7B3I5	254	265	yes	2	0.00064143	150.61	1	1	1	1	1	1	1132100000	219880000	194770000	224790000	220810000	167130000	104750000
ELYYQPR	7	0	967.476	F6REX3	F6REX3	1202	1208	yes	2	0.019379	122.5	1	1	1	1	1	1	953730000	93884000	147780000	257400000	217360000	206960000	30348000
EMECAGTVDGSIDACK	16	0	1741.7	F7APU2;F7AU56	F7APU2	483	498	yes	2	5.8503e-08	138.45	4	6	1	6	5	4	505920000	150700000	104350000	75202000	85384000	82759000	7520600
EMEDTLNHLK	10	0	1228.58	F6RRL9;Q5IF06	F6RRL9	119	128	yes	2;3	0.041713	91.064	1	1		1	2	2	104280000	15407000	27665000	33776000	9194200	18239000	0
EMEEALR	7	0	876.401	F7AVY0;F7AE68	F7AVY0	538	544	yes	2	0.042018	105.2	1	1		1	1	1	594120000	103260000	127650000	173830000	91810000	97572000	0
ENAEQSR	7	0	832.368	F7CYR1	F7CYR1	210	216	yes	2	0.012896	131.04	1			1			0	0	0	0	0	0	0
ENDDFASFR	9	0	1099.46	F6ZI35	F6ZI35	166	174	yes	1;2	6.5018e-10	183.65	2	2	2	2	2	2	7951600000	1475400000	1516800000	1840200000	1458800000	1288100000	372480000
ENEDFLESNR	10	0	1251.54	F6PQ46	F6PQ46	248	257	yes	2	7.3281e-25	200.16	1	1	1	1	1	1	200530000	38691000	30919000	42590000	50859000	23748000	13723000
ENFLFLTPDCK	11	0	1382.65	F7C0D9;F7C0Z0	F7C0D9	211	221	yes	2	1.8378e-12	173.14		1	1	1	1	1	3592200000	771660000	852090000	817390000	0	693170000	457880000
ENGCFQSSGLLLNNAIK	17	0	1863.91	F6REX3	F6REX3	1085	1101	yes	2	1.3628e-09	166.14	1	1	1	1	1	1	359840000	52798000	68325000	61405000	48854000	82557000	45901000
ENISDPTSPVR	11	0	1213.59	A0A0B4J1C4	A0A0B4J1C4	71	81	yes	2	0.019138	65.157				1			20668000	20668000	0	0	0	0	0
ENNEELTNSCETK	13	0	1566.65	F7C0D9;F7C0Z0	F7C0D9	333	345	yes	2;3	2.4834e-47	218.11	3	2	2	2	1	2	1911800000	347910000	334720000	376800000	361240000	373290000	117840000
ENNQCFDHWWLSEFHTQAQHTAK	23	0	2913.27	F6REX3	F6REX3	425	447	yes	4;5	1.8063e-14	119.01	2	2	2	2	2	2	587000000	79196000	87159000	76920000	107020000	146890000	89823000
ENPMGFSCQR	10	0	1224.5	F7BLE3;F7BTW7;F7E454;F7CJG3	F7BTW7	699	708	no	2	3.5623e-34	214.81	2	2		2	2	2	2140200000	521970000	509340000	323380000	503100000	282410000	0
ENQFDPPIVAR	11	0	1284.65	F7DZ01	F7DZ01	1281	1291	yes	2	0.012422	74.269	1	1		1			31209000	0	0	0	17533000	13676000	0
ENQYSDLLR	9	0	1136.55	F6PSH3	F6PSH3	205	213	yes	2	0.0013238	127.56	1	1	1	1	1	1	387360000	125500000	113680000	48397000	52004000	35142000	12636000
ENTISGYSLLTCK	13	0	1484.72	F6PR90	F6PR90	273	285	yes	2	0.002095	80.763	1	1	1	1	1	1	89085000	20262000	21257000	16133000	15061000	11398000	4974100
EPADPSIR	8	0	883.44	F6RGT4	F6RGT4	147	154	yes	2	0.036472	103.75				1			0	0	0	0	0	0	0
EPAHLMSLFGGK	12	0	1285.65	Q28372;F7DHZ1;F7E2D1	Q28372	480	491	yes	2;3	0.0011471	123.75	2	2	2	2	2	2	1444000000	324660000	418920000	233120000	226190000	167330000	73792000
EPFLSCCQFAEGLR	14	0	1712.77	F6XSF7	F6XSF7	736	749	yes	2;3	7.9392e-21	224.13	2	2	1	2	2	2	3416900000	772260000	709910000	490510000	659180000	546690000	238300000
EPGLQIWR	8	0	997.535	Q28372;F7DHZ1;F7E2D1	Q28372	14	21	yes	2	0.0043764	128.75	1	1	1	1	1	1	1588600000	347230000	371960000	323190000	201960000	256820000	87467000
EPGQALVVLPLTITTDFIPSFR	22	0	2413.33	F7BLE3;F7BTW7;F7E454;F7CJG3	F7BTW7	507	528	no	2	4.4893e-46	187.89	1		1	1	1	1	143270000	45159000	35930000	38739000	12851000	0	10596000
EPGQSVPTFAVTSLLR	16	0	1700.91	H9GZV1	H9GZV1	261	276	yes	2;3	2.0052e-24	174.68	2	2	2	2	2	2	26731000000	6187300000	6594000000	5223000000	3492700000	4229700000	1003900000
EPLSSGLGWAAFR	13	0	1389.7	F6SIE2	F6SIE2	73	85	yes	2	0.011146	63.734	1	1			1		20279000	0	8021000	0	7326800	4931300	0
EPQDTYYYSPFSSPHR	16	0	1972.86	Q29482	Q29482	198	213	yes	3	0.056273	33.624			1				0	0	0	0	0	0	0
EPQVYVLAPHR	11	0	1307.7	H9GZT5	H9GZT5	231	241	yes	2;3	3.8126e-05	169.12	2		1	2	2	1	1480700000	419190000	437410000	130680000	433100000	0	60275000
EPQVYVLAPHRDELSK	16	1	1879.98	H9GZT5	H9GZT5	231	246	yes	2;3;4	3.6762e-07	144.57	3	3	3	3	4	3	1493100000	296460000	300710000	263650000	267300000	249430000	115570000
EQGSHCISGNGR	12	0	1300.56	F6RI47;F6R942	F6RI47	846	857	yes	2;3	5.0174e-42	264.12	2	2	1	2	1	2	15879000000	2948000000	2203500000	3548800000	2357400000	3347700000	1474000000
EQKIISLLSAK	11	1	1228.74	F6WPQ1	F6WPQ1	2382	2392	yes	2;3	0.014352	74.376	1	1		1	1	3	140320000	56501000	10692000	12768000	50362000	9999400	0
EQLGPVTQDFWDK	13	0	1561.74	F6Z2L5	F6Z2L5	85	97	yes	2;3	9.5434e-05	149.96	2	2	2	2	2	2	39835000000	5876300000	5234200000	6955000000	8975100000	7364700000	5429900000
EQLGPVTQDFWDKLEK	16	1	1931.96	F6Z2L5	F6Z2L5	85	100	yes	2;3	1.6823e-06	157.75	2	2	1	2	1	2	17803000000	1952300000	1942000000	5604200000	6223100000	2077000000	4745100
EQLSLR	6	0	744.413	H9GZN9	H9GZN9	336	341	yes	2	0.024289	140.01	1	1	2	2	3	1	15453000000	2983400000	3968700000	3315000000	3044600000	1806600000	334980000
EQNEQVK	7	0	873.419	F6YCW8;F6YE73;F6Z5E1	F6YCW8	543	549	yes	2	0.042018	105.2	1	2			2	2	137900000	0	34922000	49854000	35143000	17983000	0
EQNFQTMK	8	0	1024.46	F6QAD8;F6R6K3;F6R7S3	F6QAD8	313	320	yes	2	0.03105	100.45	1	1		1	1	1	655640000	97118000	180290000	131600000	138740000	107880000	0
EQQALQTVCLK	11	0	1316.68	F7AW05	F7AW05	63	73	yes	2	0.0014574	144.77	1	1	1	1	1	1	1031400000	264940000	323060000	139650000	149290000	106950000	47505000
EQQDSPDEKDFFQSLK	16	1	1939.88	F6X449	F6X449	446	461	yes	3	1.9843e-05	87.148	1	1	1	1	1	1	90473000	13373000	19367000	13621000	20843000	15641000	7628300
EQSPCFSYYYCMTEK	15	0	1991.77	F6QAD8;F6R6K3;F6R7S3	F6QAD8	428	442	yes	2	0.0029381	64.878	2	1	1	2	1	1	110090000	40162000	21468000	13117000	25663000	8336100	1341400
EQTMTECEAGTLR	13	0	1524.65	F6Q7J3	F6Q7J3	811	823	yes	2	1.7813e-08	177.57	1	1	1	1	1	1	448930000	59801000	82243000	81568000	100100000	118040000	7178600
EQYEEEQEAK	10	0	1281.54	Q8MJV0;F6R839;F6R7W2;F6QAB5;F6SRY7;F6SYB0;F6SS21;F6SYE4;F6RXQ8;F6QZM9;F6Z2H1;F6SE18	Q8MJV0	1348	1357	yes	2	1.0815e-10	141.48					1		0	0	0	0	0	0	0
ERDYIFGNYIER	12	1	1573.75	F7AVY0;F7AE68	F7AVY0	545	556	yes	3	0.0014153	89.629	1			1	1	1	21746000	6116600	8925800	2816100	3887900	0	0
ERGPEEEHLGILGPVIWAEVGDTIR	25	1	2771.42	F6PQ46	F6PQ46	437	461	yes	3;4	2.2221e-21	99.838	2	2	2	2	1	2	134190000	16555000	15342000	26025000	24742000	38751000	12774000
ERPGVYTNVVK	11	1	1260.68	F6T3E4	F6T3E4	603	613	yes	2;3	0.0021089	129.38	1	2	1	1	2	2	65254000	7399300	16504000	20553000	10693000	8694800	1409700
ESASVTCLVK	10	0	1092.55	H9GZN9	H9GZN9	342	351	yes	2	0.0086007	93.267	3	5	3	4	4	4	18388000000	4892200000	5315800000	3708500000	3124100000	50204000	1297600000
ESCGYDTCYDWEK	13	0	1711.61	F6YQL3	F6YQL3	860	872	yes	2	0.013001	63.32	1			1	1	1	44471000	13527000	14057000	5652400	11235000	0	0
ESDSKPWIQVDMQR	14	1	1717.81	F7DZ01	F7DZ01	1208	1221	yes	3	0.00093939	61.212	1	1	1	1	1	1	85106000	19650000	19075000	10476000	17551000	14875000	3477800
ESEAICEK	8	0	964.417	F6RI47;F6R942	F6RI47	282	289	yes	2	0.012967	117.39	1	1	1	1	1	1	20912000000	4934100000	4290800000	2820000000	4211500000	2015200000	2640100000
ESFLNNCIYEVSR	13	0	1629.75	F7B3I5	F7B3I5	156	168	yes	2	1.81e-13	193.52	1	1	1	1	1	1	821100000	150410000	137060000	166440000	154600000	121000000	91589000
ESGEPLQK	8	0	886.44	H9GZV0	H9GZV0	253	260	yes	2	0.028824	102.71	2	1		1	1	1	346960000	93718000	52476000	117480000	50710000	32584000	0
ESKPLTGEQTTK	12	1	1317.68	F7CN05;F7CN11;F7CS60	F7CN05	984	995	yes	2	0.04499	131.09	1	1		1	1	1	344370000	105590000	76843000	121350000	19509000	21084000	0
ESLLDTFR	8	0	979.497	F6UZH0	F6UZH0	159	166	yes	2	2.1175e-38	232.39	1	1	1	1	1	1	1184400000	283940000	295010000	206980000	177320000	165130000	56023000
ESLVFVQTDK	10	0	1164.6	F6RI47;F6R942	F6RI47	126	135	yes	2	5.3155e-06	153.08	1	1	1	1	1	1	1697000000	333230000	333520000	275500000	363980000	215060000	175740000
ESLVFVQTDKPIYK	14	1	1665.9	F6RI47;F6R942	F6RI47	126	139	yes	2;3	1.7279e-19	180.36	2	2	2	2	2	2	4226800000	1002800000	709190000	705530000	907070000	735440000	166800000
ESLVFVQTDKPIYKPGQTVK	20	2	2276.24	F6RI47;F6R942	F6RI47	126	145	yes	2;3;4	2.5451e-45	241.42	6	6	6	7	9	6	14052000000	2277600000	3713000000	2160000000	2380600000	2233700000	1287500000
ESNIPVDMR	9	0	1059.5	F7DZ01	F7DZ01	1011	1019	yes	2	0.00567	129.42	1	1		1	1	1	156440000	47795000	30580000	30074000	24319000	23673000	0
ESQTVSITK	9	0	991.519	H9GZV1	H9GZV1	205	213	yes	2	0.014321	101.72	1	2	1	2	1	2	724790000	146460000	120240000	192860000	14754000	215370000	35111000
ESQTVSITKPK	11	1	1216.67	H9GZV1	H9GZV1	205	215	yes	3	0.023375	55.452	1	1		1	1	1	6452200000	2262400000	952510000	1257700000	389320000	1590300000	0
ESVPISDTIIPAVPPPTDLR	20	0	2116.14	F7CN05;F7CN11	F7CN05	1254	1273	yes	2	0.0013794	82.908			1	1	1	1	111200000	22640000	19881000	16552000	0	0	52127000
ESWPVTYK	8	0	1008.49	H9GZN9	H9GZN9	167	174	yes	2	0.056323	89.55	1	1	1	1	1	1	8316800000	1387300000	1506600000	1921800000	1590000000	1373000000	538190000
ETEYGPCR	8	0	1010.41	F6RRL9;Q5IF06	F6RRL9	110	117	yes	2	0.058919	92.467						1	0	0	0	0	0	0	0
ETFTYEWTVPK	11	0	1399.67	F6PQ46	F6PQ46	512	522	yes	2	0.045036	61.56	1	1		1	1	1	3870500000	826020000	694790000	753140000	926740000	669840000	0
ETGQGYQR	8	0	937.425	F6UEG9	F6UEG9	136	143	yes	2	0.0073905	122.79	1	1		1			180600000	74333000	0	0	63439000	42831000	0
ETLFSVIPGLK	11	0	1202.69	F6R3F4	F6R3F4	827	837	yes	2	0.0030406	107.57	1	1	1	1	1	1	1500300000	324000000	286800000	256850000	281070000	227090000	124490000
ETVQTTEDQILK	12	0	1403.71	F6ZSZ5;F6ZT22;F6ZT60	F6ZSZ5	60	71	yes	2	0.017323	67.207			1	1			17363000	16092000	0	0	0	0	1271700
ETWTGHIGEVQPSVLQVVNLPIVEHSVCK	29	0	3254.68	F7BFJ1	F7BFJ1	510	538	yes	3;4	3.7731e-46	159.86	2	2	2	2	3	2	3160700000	528900000	708270000	419790000	534180000	579840000	389710000
EVAFDVEIPK	10	0	1145.6	F6QX36	F6QX36	84	93	yes	1;2	0.0084169	109.71	3	3	1	2	2	3	2064800000	425050000	483820000	313670000	415290000	281410000	145500000
EVALGVGIPGDSIVTLADR	19	0	1881.02	F6UZH0	F6UZH0	167	185	yes	2	1.4261e-29	179.83	1	1	2	1	1	1	607850000	150900000	131600000	93318000	86354000	77004000	68666000
EVALNTIIFMGR	12	0	1362.73	F7CYR1	F7CYR1	447	458	yes	2;3	2.9265e-16	206.78	3	2	2	2	5	4	1133600000	230150000	149490000	192660000	246490000	199810000	115030000
EVATNSELVQSGK	13	0	1360.68	F7ATL5;F6YIA9	F7ATL5	198	210	yes	2	0.00015748	131.82	1	1					21603000	0	0	0	17373000	4229800	0
EVEDCVTNRPCR	12	1	1533.67	F7AXF6	F7AXF6	108	119	yes	3	0.004057	88.441	1	1			1	1	60011000	0	0	13092000	36024000	10896000	0
EVEPVELPNCNFVK	14	0	1672.81	F7DTV1	F7DTV1	33	46	yes	2;3	1.1209e-05	157.66	2	2	2	2	2	2	2742400000	562480000	891270000	371400000	464610000	350320000	102320000
EVGPTYKDPVCLSK	14	1	1591.79	F6PQ46	F6PQ46	523	536	yes	2;3	0.00015657	139.32	2	2	2	2	2	2	3366700000	811340000	690760000	580550000	705710000	428380000	149930000
EVIDPAK	7	0	770.417	F7C450	F7C450	211	217	yes	2	0.046384	100.07	1	1	1		1		7748300000	0	1228200000	0	2042600000	3625900000	851630000
EVLLQTFLDDASPGDKR	17	1	1902.97	F6YCW8;F6YE73;F6Z5E1	F6YCW8	501	517	yes	2;3	2.5245e-76	234.17	2	2	2	2	2	2	544270000	120480000	96459000	82301000	112670000	98454000	33916000
EVLLTGIQTQGAK	13	0	1356.76	F7DZ01	F7DZ01	1222	1234	yes	2	0.0010459	115.78			1				15905000	0	0	0	0	0	15905000
EVQGFESATFLGYFK	15	0	1721.83	Q28372;F7DHZ1;F7E2D1	Q28372	97	111	yes	2	9.3093e-06	146.16	6	3	4	6	6	6	916820000	204330000	241860000	214300000	156600000	20149000	79573000
EVSFDVELPK	10	0	1161.59	F7AVY0;F7AE68	F7AVY0	76	85	yes	2	0.011465	111.39	1	1	1	1	1	1	262030000	62795000	56050000	41728000	50839000	34136000	16485000
EVSSCHCAPCR	11	0	1361.53	F7AXF6	F7AXF6	501	511	yes	2;3	9.393e-05	150.4	2	2		2	2	2	461500000	76907000	169230000	81421000	72126000	61823000	0
EVTCDPPYIPNGVYSPR	17	0	1962.91	F6ZR63	F6ZR63	264	280	yes	2;3	0.00011631	78.157		1	1		2		47616000	0	43094000	0	0	2419900	2102100
EVVADSVWVDVK	12	0	1344.69	F7BLE3;F7BTW7;F7E454;F7CJG3	F7BTW7	543	554	no	2	2.8309e-10	135.55	11	11	8	11	13	10	1270600000	191580000	370340000	247250000	234430000	175310000	51677000
EVVTDQFLCSGTGK	14	0	1539.72	F6PPQ0	F6PPQ0	651	664	yes	2;3	0.00045343	116.55	2	1	1	1	1	1	625310000	151160000	129760000	80694000	139420000	94154000	30123000
EVVTDQFLCSGTGKDDNPCK	20	1	2269	F6PPQ0	F6PPQ0	651	670	yes	3	0.002311	46.131	1			1	1	1	42888000	15141000	13761000	8101000	5885400	0	0
EVYTATSIFQDDFVIPDISEPGTWK	25	0	2857.37	F6XSF7	F6XSF7	196	220	yes	3	3.912e-05	46.558					1		15555000	0	15555000	0	0	0	0
EYAFNSLLCASDVGVSEK	18	0	1987.92	F6QAD8;F6R6K3;F6R7S3	F6QAD8	908	925	yes	2;3	1.0831e-28	209.21	2	2	1	2	2	2	1039700000	199210000	199790000	173230000	181720000	202230000	83482000
EYCGIPGDGDEELLR	15	0	1721.76	F6UZH0;P04365	F6UZH0	335	349	yes	2;3	1.9772e-11	155.48	2	3	4	3	4	2	2621800000	497930000	691250000	484630000	451640000	367650000	128720000
EYLGAICSCTCFGGQR	16	0	1877.79	F7CN05;F7CN11;F7CS60;O46557	F7CN05	2220	2235	yes	2	2.5316e-05	90.685			1	2	1	1	38420000	11683000	8409200	14374000	0	0	3954200
EYLIMGLDGATYDLK	15	0	1700.83	F6XSF7	F6XSF7	1688	1702	yes	2	0.00057074	100.04			1				26156000	0	0	0	0	0	26156000
EYNPGER	7	0	863.377	F6XSF7	F6XSF7	586	592	yes	2	0.04848	97.602	1	1		1	1	1	1299000000	249170000	415300000	210690000	274600000	149270000	0
EYSAAVAR	8	0	865.429	F6R3F4	F6R3F4	103	110	yes	2	0.0067847	123.99	1	1	1	1	1	1	2286700000	455530000	666320000	376060000	471780000	231510000	85495000
EYSGTIASEANTYLNSEGTR	20	0	2161.98	F6YCW8;F6YE73;Q7YQQ6	F6YCW8	3464	3483	yes	2;3	1.9204e-06	92.457	1	1	1		2	2	79479000	0	5706400	28886000	11877000	20805000	12205000
EYTDASFR	8	0	987.43	F6PQ46	F6PQ46	426	433	yes	1;2	2.3387e-19	203.19	2	2	2	2	2	2	1743400000	261930000	231680000	431820000	355420000	295420000	167160000
EYVAQFEASALGK	13	0	1411.7	F6Z2L5	F6Z2L5	51	63	yes	2;3	5.6241e-09	156.16	12	11	14	12	10	9	17255000000	3971500000	3290100000	2460400000	2677100000	2501500000	2354900000
EYVLPSFEVQVEPTEK	16	0	1892.94	F7BLE3;F7BTW7;F7E454;F7CJG3	F7BTW7	225	240	no	2;3	2.7461e-24	182.08	2	2	2	2	2	2	6506900000	1162100000	1206900000	1046700000	992990000	1181200000	917060000
EYYFAEAQAADFSDPAFILK	20	0	2295.07	F7BM31	F7BM31	239	258	yes	2	1.1041e-07	106.17	1	1		1	1	1	124350000	32655000	20928000	23612000	22292000	24863000	0
FACYHPR	7	0	949.423	F6XSF7	F6XSF7	1622	1628	yes	2	0.005034	137.2	1	1	1	1	1	1	300690000	0	246530000	24818000	0	22562000	6782100
FAFNLYR	7	0	929.476	F7BM31	F7BM31	130	136	yes	2	0.021565	120.76	1	1	1	1	1	1	157580000	39008000	32122000	30442000	21798000	24358000	9854200
FAGFPDLITR	10	0	1135.6	F6PUW3	F6PUW3	1297	1306	yes	2	4.1681e-06	154.49	1	1		1	1	1	167590000	41581000	34980000	34900000	30522000	25604000	0
FAHCVITSQVVNSADEAK	18	0	1974.95	F6QX36	F6QX36	66	83	yes	2;3	1.7923e-15	182.02	2	2	2	2	2	2	1812200000	351170000	271980000	422550000	397860000	289540000	79062000
FAHNVVTTR	9	0	1043.55	F7AVY0;F7AE68	F7AVY0	58	66	yes	2	0.00043593	141.93	1	1	1	1		1	609970000	201980000	0	127110000	119400000	151520000	9961500
FAHTVVTSR	9	0	1016.54	F6R3F4	F6R3F4	47	55	yes	2	1.9045e-09	178.65	1	1	1	1	1	1	1422200000	329370000	377280000	282270000	307210000	106150000	19892000
FAQSEMDDDDVPEDTIYK	18	0	2116.88	F7DZ01	F7DZ01	849	866	yes	2	2.7163e-07	99.941	1	1	1	1	1	1	136630000	34672000	33447000	22195000	24930000	19298000	2091200
FATAFYQHLADFK	13	0	1557.76	F7CYR1	F7CYR1	91	103	yes	2;3	8.3186e-05	102.87	1	1	2	1	1	1	324990000	43088000	38814000	28382000	34145000	71737000	108820000
FCDVDTEASCYHGR	14	0	1715.67	F7DGR1	F7DGR1	208	221	yes	2;3	3.7197e-10	156.69	2	1	1	2	2	2	521890000	92480000	140700000	84335000	82578000	102640000	19151000
FCGQPDSPLGNHPGK	15	0	1609.73	F6Z5L1	F6Z5L1	88	102	yes	2;3	7.2976e-07	104.7	2	2	2	2	1	2	669150000	149370000	98200000	120730000	143650000	133030000	24165000
FCLFQSATK	9	0	1100.53	F6ZEH8;Q9TQR4;Q71UB5;P27425;O97677	P27425	646	654	no	2	5.5356e-07	171.38	4	3	3	4	4	3	21538000000	6505300000	4897700000	2580000000	4741100000	2029100000	785030000
FCLFQSVTK	9	0	1128.56	O97971	O97971	14	22	yes	2	0.00043373	145.63	1	1	1		1	1	3486700000	0	1165700000	1104300000	387980000	668300000	160480000
FCPDDIIHQPPVALPFVEYNEVIENFR	27	0	3257.59	F6QAD8	F6QAD8	692	718	yes	3	6.4332e-25	132.39	1	1	1	1		1	254660000	62119000	0	66257000	44190000	63243000	18847000
FDGGVEAIATR	11	0	1134.57	F6RGT4;K9KB71	F6RGT4	487	497	yes	2	0.00072829	105.98	1	1			1	1	38125000	0	13375000	0	14351000	10399000	0
FDHLITNVNDNYQPR	15	0	1844.88	F7BUV8	F7BUV8	141	155	yes	2;3	3.2791e-09	170.89	2	2	1	2	2	2	1120600000	367240000	229120000	152260000	166970000	147040000	58006000
FDLSSFNPHGISTFTDEDNTVYLLVVNHPDFK	32	0	3667.75	F7DTV1	F7DTV1	107	138	yes	4	2.4864e-07	50.229			1				17043000	0	0	0	0	0	17043000
FDPSLTQR	8	0	962.482	F6X449	F6X449	245	252	yes	2	0.00018457	157.52	1		1	1	1		196450000	45169000	44393000	0	81800000	0	25090000
FDSDAASPR	9	0	964.425	F7BSX5;F2VYZ0;D9MNN2;D9MNN5;Q860N8;Q860N7;F2VYY8;Q0R0C0;B2X055;D9MNN4;F6XUF3;Q30485;Q0R0B8;Q0R0B6;Q0R0C9;Q30486;F6RHP4;Q38RB4;F6WCX4;F6RPN5;Q0R0B7;F2VYY5;C9K796;F7DB76;Q0R0D8;Q0R0D5;Q0R0D0;Q30487;Q0R0B5;Q0R0D6;B2X053;F6UE14;F6V143;F2VYX6;Q95479	F7BSX5	60	68	no	2	0.00030806	151.04	1	1	1	1	1	1	1496500000	411840000	315210000	159210000	270840000	200890000	138470000
FDSDAATPR	9	0	978.441	F6R545;F6R4X4	F6R545	61	69	yes	2	0.00042942	140.09	1	1	1	1	1	1	1380700000	190050000	152620000	425890000	351500000	225870000	34714000
FDTISEK	7	0	838.407	F7CYR1	F7CYR1	141	147	yes	2	0.021728	120.65	1		2	1	1	1	4367900000	1455600000	340380000	459970000	1932100000	0	179750000
FECSSGLMLDGPTEIHCSADGNWSGEK	27	0	2983.24	F6ZR63	F6ZR63	176	202	yes	3	6.0139e-07	75.226	1	1		1	1		68622000	18536000	10656000	0	28174000	11257000	0
FECSSGLMLDGPTEIHCSADGNWSGEKPR	29	1	3236.4	F6ZR63	F6ZR63	176	204	yes	3;4	1.9185e-55	181.37	3	3	2	4	4	4	1438400000	338970000	285260000	307320000	184340000	247100000	75419000
FEDGVLDPDYPR	12	0	1421.65	F6V881	F6V881	227	238	yes	2	1.5139e-22	190.24	1	1	1	1	1	1	993390000	222760000	231810000	242710000	152750000	112470000	30886000
FEDTSK	6	0	725.323	F6YCW8;F6YE73;F6Z5E1	F6YCW8	247	252	yes	2	0.035714	117.7	1	1		1	1	1	822480000	173360000	183640000	161500000	178040000	125940000	0
FEEMAK	6	0	753.337	F7B3I5	F7B3I5	185	190	yes	2	0.04399	110.54	1	1	1	1	1	1	783000000	219630000	134290000	161940000	129930000	120500000	16691000
FEGTSSLTK	9	0	968.481	F6YCW8;F6YE73;Q7YQQ6	F6YCW8	3337	3345	yes	2	0.016192	99.442	1	1	1	1	1	1	367980000	63409000	73444000	38104000	140030000	45311000	7679800
FEIQSQVESQHVGR	14	0	1642.81	F6YCW8;F6YE73	F6YCW8	2945	2958	yes	2;3	6.742e-06	145.31	2	1	1	1	2	2	318990000	50098000	51735000	53375000	119130000	40621000	4034000
FELELRPTGEVEQYSASATYK	21	1	2417.18	F6YCW8;F6YE73;F6Z5E1	F6YCW8	960	980	yes	3	1.8523e-15	106.86		1	1	1	1		133080000	34291000	33583000	0	0	30693000	34515000
FEQLELR	7	0	933.492	F6XSF7	F6XSF7	852	858	yes	2	0.01761	124.34	1	1		1	1	1	96646000	28838000	24524000	11692000	19734000	11858000	0
FEQLELRPVLYNYLDK	16	1	2039.07	F6XSF7	F6XSF7	852	867	yes	2;3	1.5799e-42	206.88	2	2	2	2	2	2	1058600000	251730000	242500000	79915000	225290000	218600000	40603000
FEVQVTVPK	9	0	1045.58	F6RI47;F6R942	F6RI47	229	237	yes	2	0.017843	97.431	3	4	1	3	2	1	9586400000	2261200000	2509000000	1410800000	2024900000	1065900000	314560000
FFFTNGEK	8	0	988.465	F7CI62;Q1WDE9	F7CI62	137	144	yes	2	0.0048367	127.84	1	1	1	1	1	1	87240000	24009000	15662000	12024000	7849700	20497000	7198400
FFSSSCVPCVDGK	13	0	1488.64	F6PKE1	F6PKE1	160	172	yes	2	0.0011181	104.79	1	1	1	1	1	1	1051200000	247390000	335530000	174540000	137120000	130690000	25980000
FGGGTHLTIAGGPTSAPSVSLFPPSSEELSANK	33	0	3212.6	F7D1U4	F7D1U4	1	33	yes	3	5.7993e-17	97.408	1	1	1		1		581900000	0	190960000	0	183370000	69755000	137820000
FGHTPVQER	9	0	1069.53	F6Z129	F6Z129	116	124	yes	2;3	0.026958	101.72	2	2	2	3	2	3	1427000000	429600000	300870000	210760000	265160000	178550000	42041000
FGLLTEDGVK	10	0	1077.57	F6XSF7	F6XSF7	290	299	yes	2	5.5504e-05	140.5	2	1		1	1	1	1373800000	351440000	353960000	194720000	312870000	160780000	0
FGPEGCQPLVTSAVDR	16	0	1731.83	F6RCZ8	F6RCZ8	54	69	yes	2	0.002598	59.306				1	1	1	30411000	12273000	8010000	10128000	0	0	0
FGPYCGHGFSGPLNIETK	18	0	1979.92	F7BQD6	F7BQD6	253	270	yes	2;3	0.00068828	53.362	1	1	1	2	2	2	271000000	71631000	62457000	43584000	37780000	36721000	18826000
FGSSVITVR	9	0	964.534	F7A8N4	F7A8N4	801	809	yes	2	0.00044899	147.04	1	1		1		1	78113000	31489000	0	21491000	14493000	10640000	0
FGWSPIPSCR	10	0	1205.57	F6ZR63	F6ZR63	254	263	yes	2	5.1558e-08	164.96	1	1	1	1	1	1	662570000	159580000	160920000	127930000	118310000	76732000	19101000
FHDCCQEK	8	0	1122.42	F6T0P6	F6T0P6	296	303	yes	2;3	8.4523e-06	184.49	2	2	2	2	2	2	15403000000	1577000000	2330800000	3358500000	3473700000	3644700000	1018200000
FIAVGYVDDTQFVR	14	0	1628.82	F7BSX5;F2VYZ0;F2VYZ1;Q860N8;Q30482;Q860N7;Q30485;F2VYY9;F6RPN5;F6R545;F6R4X4	F7BSX5	46	59	no	2	9.3985e-73	239.31	3	1	2	3	1	2	869470000	17867000	77010000	194660000	139610000	173980000	266340000
FICTCPDGFQGR	12	0	1456.62	F6VZ73	F6VZ73	149	160	yes	2	0.00091709	126.07	1	1	1	1	1	1	240900000	47571000	53157000	35650000	47185000	43145000	14189000
FIEAVTGWK	9	0	1049.55	F6W4R2	F6W4R2	256	264	yes	2	0.0015504	117.4				1	1		0	0	0	0	0	0	0
FIESQDYQCSAR	12	0	1502.65	Q4W447;F6YXS1	Q4W447	169	180	yes	2	7.9861e-08	178.22	1	1		1	1	1	129080000	32722000	27965000	18108000	35172000	15114000	0
FISVGYVDDTQFVR	14	0	1644.81	F2VYX6;M4PPR7;Q860N5	M4PPR7	46	59	no	2	8.4387e-38	207.34					1	1	125470000	0	116580000	8889400	0	0	0
FITQWGEESSESNPKPGQFR	20	1	2323.09	F7BQX4;F7BR00;F6ZCC8;Q28390	F7BQX4	663	682	yes	3	0.038104	32.366				1	1		23213000	10132000	13080000	0	0	0	0
FKPTLSQQR	9	1	1103.61	F6R3F4	F6R3F4	214	222	yes	3	0.0031012	115.71	1	1	1	1	1	2	1158000000	184030000	346350000	219850000	236800000	146720000	24247000
FLCTGGVNPYADPNTCR	17	0	1940.85	F6RMD0;K9KBR1	F6RMD0	684	700	yes	2;3	7.9465e-16	191.26	2	2	2	2	2	2	3450200000	827970000	590470000	619770000	772040000	478980000	160950000
FLEDTFGSDGRPR	13	1	1495.71	F6V3X9	F6V3X9	144	156	yes	3	0.0059071	71.085				1			0	0	0	0	0	0	0
FLEPFEIDDHQQVHCPYDQLQIYASGR	27	0	3304.52	F6Z5L1	F6Z5L1	236	262	yes	4	9.191e-07	68.231			1		1	1	104960000	0	39519000	22818000	0	0	42627000
FLEQELETITIPDLR	15	0	1815.96	F7CR03	F7CR03	41	55	yes	3	6.0043e-06	71.08	1	1		1	1	1	35228000	7741600	7256000	4523200	8265400	7441500	0
FLEQQNQVLQTK	12	0	1474.78	F7B7X0;F7AAI4;F7BP93;F6WGX6;F6SHJ8;F7A559;F7AN17	F7B7X0	197	208	yes	2	8.7559e-05	163.38	1	1	1	1	1	1	469180000	62190000	47115000	40534000	232910000	69699000	16732000
FLLYNR	6	0	824.454	F6UEG9	F6UEG9	144	149	yes	2	0.031184	130.16	1	1	1	1	1	1	150240000	28900000	42470000	30774000	24583000	18803000	4711200
FLNEMVAPVMR	11	0	1305.66	F6TMF6	F6TMF6	114	124	yes	2	0.0023472	92.439		1		1	1	1	20310000	0	11762000	6157100	0	2390700	0
FLNNGICTAEGK	12	0	1322.63	F7APU2;F7AU56	F7APU2	77	88	yes	2	0.0019427	114.4	1	1		1	1	1	652940000	180920000	159960000	102850000	100470000	108740000	0
FLQDIYNSNNQK	12	0	1482.71	F6W2Y1	F6W2Y1	135	146	yes	2	0.0017151	140.49		1	1	1	1		130400000	87986000	32368000	0	0	7942700	2104000
FLQEQGHR	8	0	1013.5	F6Y0C1	F6Y0C1	61	68	yes	2	0.00087677	148.07	1	1		1	1	1	309260000	65675000	92193000	53874000	34693000	62824000	0
FLSIER	6	0	763.423	F6XSF7	F6XSF7	477	482	yes	2	0.036669	116.87	1	1		1	1	1	530060000	125510000	146640000	77810000	97583000	82514000	0
FLSTVSTVLTSK	12	0	1281.72	P01959	P01959	129	140	yes	2	0.0021729	97.813	1	1	1	1	1	1	563620000	130280000	70199000	99616000	87416000	153780000	22324000
FLVNLVK	7	0	831.522	F7B3I5	F7B3I5	550	556	yes	2	0.037601	109.88	1	1		1	1	1	317060000	81542000	86511000	51461000	55454000	42097000	0
FMETVAEK	8	0	953.453	Q29482	Q29482	430	437	yes	2	0.030231	101.28	1	1	1	1	1	1	3258500000	705240000	710700000	418660000	798130000	553150000	72600000
FNDLGEK	7	0	821.392	F7BAY6;Q5XLE4;P35747	F7BAY6	35	41	no	2	0.0023796	148.33	3	3	3	1	2	2	78437000000	13710000000	14095000000	14528000000	14826000000	12766000000	8513400000
FNPVSGEVPPK	11	0	1169.61	F6X1I8	F6X1I8	211	221	yes	2	0.0028927	96.668	9	3	3	4	9	3	1501000000	282440000	277170000	194690000	405350000	272870000	68429000
FNVNNTILHPEIVECR	16	0	1953.97	F6Y2H3;F6Y2V7	F6Y2H3	168	183	yes	3	1.7288e-06	117.37	1	1		1	1	1	254020000	65377000	66934000	53164000	40900000	27646000	0
FNWYMDGVEVR	11	0	1414.63	Q95M34;H9GZQ9	Q95M34	163	173	yes	2;3	7.5034e-26	203.19	4	5	5	5	6	5	37738000000	8719000000	6281300000	7661700000	6857500000	3542000000	4676600000
FNWYVDGVEAHTATTK	16	0	1837.86	H9GZU8	H9GZU8	150	165	yes	2;3	1.8215e-43	202.18	9	10	10	14	16	9	16220000000	3067900000	6847700000	1332700000	1757200000	2174400000	1039900000
FPEVDVLTK	9	0	1046.56	F6YCW8;F6YE73	F6YCW8	3747	3755	yes	2	0.05655	80.455	1	1	1	1	1	1	143110000	21183000	33851000	30152000	28288000	19948000	9688000
FPFALEVQTLPQTCEGSK	18	0	2051	F6RI47;F6R942	F6RI47	1342	1359	yes	2;3	3.7221e-62	263.7	2	2	2	2	2	2	11017000000	1724200000	1642600000	2047300000	1905600000	2018500000	1678800000
FPHDTVYGQCK	11	0	1350.6	F6RRV1	F6RRV1	106	116	yes	2;3	6.3249e-19	195.32	2	2	1	2	2	2	1345800000	199260000	372320000	286510000	300310000	169670000	17713000
FPKADFAEVSK	11	1	1237.63	F7BAY6;Q5XLE4;P35747	F7BAY6	246	256	no	3	0.037533	57.802	1	1	1			1	72922000	0	0	16406000	22974000	29718000	3823800
FPVEMTHNHNFR	12	0	1527.7	F7BM31	F7BM31	300	311	yes	2;3;4	0.00017566	127.4	2	2	2	2	2	2	427600000	108970000	82710000	67193000	90267000	54529000	23939000
FPVFMGR	7	0	852.432	F7CZW9	F7CZW9	464	470	yes	2	3.5801e-05	166.66	1	1	1	1	1	1	677270000	156650000	160490000	84328000	136710000	105980000	33103000
FQEAEK	6	0	750.355	F7DU87;Q0PMN3	F7DU87	78	83	yes	2	0.063684	100.67		1		1	1	1	520600000	67714000	79397000	66773000	0	306720000	0
FQEDTCYGDAGSAFVIHDEEDDTWYAAGILSFDK	34	0	3871.65	F6XWM5	F6XWM5	286	319	yes	3;4	2.6409e-12	63.033	5	3	4	3	2	1	236290000	38657000	26004000	17376000	51134000	46063000	57058000
FQEGQEEER	9	0	1150.49	F6UZI2	F6UZI2	491	499	yes	2	3.9293e-06	167.24	1	1	1	1	1	1	246610000	32883000	75744000	41710000	57711000	31646000	6917600
FQLQAR	6	0	761.418	F6Y0C1	F6Y0C1	111	116	yes	2	0.03882	115.01	1	1	1	1	1	1	167370000	38230000	28386000	29637000	34811000	28794000	7507600
FQVDNK	6	0	749.371	F6RI47;F6R942	F6RI47	1293	1298	yes	2	0.037878	115.83	1	1	1	1	1	1	9965000000	1698000000	1875200000	2045400000	1992000000	1695500000	658920000
FQVENTNR	8	0	1006.48	F6QAD8;F6R6K3;F6R7S3	F6QAD8	1285	1292	yes	2	1.3843e-14	196.98				1	1	1	502990000	165680000	154110000	183190000	0	0	0
FQVSVNVAPEAK	12	0	1287.68	F6R3F4	F6R3F4	127	138	yes	2	0.0021808	99.973	1	1	1	4	1		91194000	19254000	22386000	0	11152000	10297000	28104000
FSALDLTNNGK	11	0	1178.59	F6YCW8;F6YE73	F6YCW8	1761	1771	yes	2	1.0512e-25	200.54	1		1		1		35973000	0	27566000	0	8406200	0	0
FSCMCPQGYQVVR	13	0	1630.71	F6T0M8;F6PVG3	F6T0M8	313	325	yes	2	0.0029731	77.677	1	1		1	1	1	42969000	13154000	14650000	5668400	6328100	3168200	0
FSGTWYAMAK	10	0	1160.53	Q28369	Q28369	38	47	yes	2	0.00344	104.06	1	1	1	1	1	1	70829000	16582000	18922000	11269000	9026800	13171000	1857700
FSIEFTATETTCSK	14	0	1620.73	F7C0D9;F7C0Z0	F7C0D9	319	332	yes	2	0.0014922	77.593	2	1		2	2	3	101770000	16879000	29136000	33439000	17044000	5276300	0
FSPENTR	7	0	849.398	F7CYR1	F7CYR1	262	268	yes	2	0.02332	119.57	1	1	1	1	1	1	5203400000	823870000	1051900000	1006500000	1178400000	974640000	168070000
FSSSNSGNTATLTISR	16	0	1641.8	A0A0A1E417	A0A0A1E417	80	95	yes	2	1.0725e-05	144.57	2	2	1	2	2	1	498700000	123310000	131290000	82666000	72031000	74806000	14596000
FSSSSSGNTATLTISR	16	0	1614.78	F6PNY0	F6PNY0	61	76	yes	2;3	7.5605e-44	251.03	8	4	3	5	8	5	2618500000	519680000	776420000	337430000	540110000	332900000	111970000
FSYDLSQCINQMK	13	0	1632.73	F7ATS5	F7ATS5	155	167	yes	2	0.0011496	114.5				1		1	30510000	16575000	0	13935000	0	0	0
FTCPLTGR	8	0	950.464	F6Z041	F6Z041	64	71	yes	2	0.0011065	143.85		1	1	1	1	1	1604600000	413430000	464870000	261690000	0	322210000	142450000
FTENENVCEQR	11	0	1424.6	F7B3I5	F7B3I5	333	343	yes	2	1.2736e-25	198.58	1	1	1	1	1	1	786650000	200180000	148040000	145020000	97444000	162090000	33883000
FTNVGPDTMR	10	0	1136.53	F7CN05;F7CN11;F7CS60	F7CN05	1274	1283	yes	2	4.5654e-18	195.17	1	1		1	1	1	534810000	183130000	146160000	132910000	36220000	36389000	0
FTVTQQPQPGSTPLHR	16	0	1792.92	F7C0I7;F7DMY7	F7C0I7	988	1003	yes	3	0.057933	24.287		1	1		1		16781000	0	10169000	0	0	5729700	882880
FVHVPDTFDGHFDGVPVISK	20	0	2212.1	F7DL17;F7CTJ3;F7DAF6	F7DL17	223	242	yes	2;3;4	2.3728e-17	142.1	2	2	1	4	3	4	3545400000	786650000	656820000	864180000	479170000	492110000	266420000
FVSSPFSLDLSNTK	14	0	1540.78	F6XSF7	F6XSF7	368	381	yes	2	1.8121e-86	248.88	1	1	1	1	1	1	622960000	123770000	164690000	77800000	107660000	87653000	61385000
FVYHLSDLCK	10	0	1280.62	A0A0B4J1C4	A0A0B4J1C4	84	93	yes	2;3	1.2414e-06	158.07	2	2	2	2	2	2	4020400000	1220400000	978050000	696600000	516410000	455680000	153330000
FYHPEK	6	0	819.392	F7BTW7;F7E454;F7CJG3	F7BTW7	1493	1498	yes	2	0.037678	116	1	1	1	1	1	1	698050000	185190000	216450000	77331000	126340000	67913000	24829000
FYHPEKEDGMLSK	13	1	1579.73	F7BTW7;F7E454;F7CJG3	F7BTW7	1493	1505	yes	2;3;4	0.0001927	124.67	6	6	4	9	5	3	8354400000	2056900000	1998300000	1264800000	1579300000	1309300000	145820000
FYNQVSTPLLR	11	0	1336.71	F7DL17;F7CTJ3;F7DAF6	F7DL17	489	499	yes	2	6.7156e-27	209.19	1	2	1	1	1	1	1253700000	292040000	348810000	187910000	184340000	166660000	73903000
FYYIDDPNGLEVTITAR	17	0	1985.97	F7BTW7;F7E454;F7CJG3	F7BTW7	241	257	yes	2	1.1685e-09	130.1	1	1	1	3	2	2	115710000	37389000	15857000	31372000	13404000	11915000	5773700
GAHPLSIEPIGVR	13	0	1344.75	F6PQ46;Q9N1X0	F6PQ46	468	480	yes	2;3	0.00019043	156.92	2	2	3	2	2	2	10772000000	3202000000	2593100000	1669400000	1693600000	1382900000	230610000
GANACQETCTK	11	0	1238.5	F6PR90	F6PR90	314	324	yes	2	5.4813e-19	195.57	1	1	1	1	1	1	334780000	63122000	80271000	52429000	61491000	55793000	21674000
GAPSTHTVPACQR	13	0	1380.66	F6Q7J3	F6Q7J3	691	703	yes	3	0.00025716	106.01	1	1		1	1	1	192710000	34100000	67478000	28902000	32019000	30209000	0
GATALELMLINVPR	14	0	1496.84	F7ABW7	F7ABW7	331	344	yes	2	0.0004556	94.309	1	1		1	1	1	31341000	6891000	5887200	7059000	8239400	3264100	0
GATQEFK	7	0	779.381	F6RI47;F6R942	F6RI47	109	115	yes	2	0.0041815	143.37	1	1	2	1	2	1	18120000000	3936800000	4781400000	2704800000	3782700000	1790200000	1124400000
GATYNIIVEALK	12	0	1290.72	F7CN05;F7CN11;F7CS60;Q28377	F7CN05	2074	2085	yes	2	0.0023047	131.52	1	1	1	1	1	1	477310000	142310000	131160000	115990000	19125000	20190000	48542000
GAWAQPFNPESTR	13	0	1459.68	F7DRS2	F7DRS2	204	216	yes	2	0.0010218	119.68	1	1	1	1	1	2	217730000	50702000	86083000	34038000	13364000	24042000	9503500
GAYQNNEMK	9	0	1053.45	F6YCW8;F6YE73	F6YCW8	1787	1795	yes	2	0.0061066	113.5	1	1		1	1	1	206690000	38924000	34954000	29377000	78054000	25378000	0
GCPTEEGCGER	11	0	1250.47	F6Q7J3	F6Q7J3	77	87	yes	2	0.0043142	93.649	1	1		1	2	1	235000000	58759000	28714000	40023000	71838000	35671000	0
GCVYLQTSFK	10	0	1201.58	F6RI47;F6R942	F6RI47	1323	1332	yes	2	1.9434e-10	173.23	8	7	9	9	9	8	8931900000	1999300000	2483100000	1579200000	1747600000	820460000	302260000
GDACDHDDDNDGIPDDR	17	0	1900.68	F6YR34	F6YR34	891	907	yes	3	0.018537	33.307						1	11468000	0	0	11468000	0	0	0
GDACEGDSGGPFVMK	15	0	1525.62	F7BFJ1	F7BFJ1	562	576	yes	2	3.0185e-05	109.6	1	1	1	1	1	1	617980000	77857000	123540000	90233000	129100000	152340000	44908000
GDDITMVLILPKPEK	15	1	1667.92	F7CYR1	F7CYR1	309	323	yes	2;3	0.00022584	155.99	5	4	6	4	6	5	1243300000	193440000	162070000	189250000	276170000	182850000	239490000
GDEEGIPAVVIDMSGLR	17	0	1756.87	F6WA57;K9KEC7	F6WA57	311	327	yes	2	7.72e-08	105.66	1	1		1	1	1	83874000	27835000	15697000	17537000	12345000	10460000	0
GDILDILK	8	0	885.517	F7CZW9	F7CZW9	44	51	yes	2	0.013211	117.18	1	1	1	1	1	1	1067500000	227390000	143450000	161590000	188440000	180600000	165980000
GDKELLIGGEK	11	1	1157.63	O97641;F6RUZ6	F6RUZ6	387	397	no	2;3	9.2712e-06	162.36	2	1		2	1	2	331500000	111140000	69611000	84079000	45798000	20873000	0
GDKPFGPDLK	10	1	1072.56	F6X449	F6X449	466	475	yes	3	0.020521	63.864	1	1		1	1	1	264960000	49091000	63999000	42428000	55701000	53740000	0
GDSGGPLIIHK	11	0	1092.59	F6RMD0;K9KBR1	F6RMD0	701	711	yes	1;2;3	0.0053131	109.71	2	2	1	4	3	2	2553500000	721950000	716890000	287480000	448830000	312300000	66087000
GDSPASSKPISIDYR	15	1	1591.78	F7CN05;F7CN11;F7CS60	F7CN05	1524	1538	yes	2;3	1.7719e-05	105.03	2	2	2	2	2	2	676220000	208160000	197510000	183100000	31028000	34012000	22410000
GDTFLGITDVK	11	0	1164.6	F7CI62;Q1WDE9	F7CI62	179	189	yes	2	0.005422	89.08	1	1	1	1	1	1	601190000	167170000	154020000	74977000	82770000	94601000	27660000
GEADAMSLDGGFIYIAGK	18	0	1813.86	F6ZEH8;Q9TQU2;Q9TQU1;P27425	P27425	405	422	no	2;3	2.929e-20	160.22	21	37	20	25	9	26	5506100000	998050000	1090100000	957960000	1271400000	335260000	853430000
GECQDEGILFFK	12	0	1441.65	F6X1I8	F6X1I8	154	165	yes	2;3	7.6467e-12	160.82	1	1	2	1	1	1	7613300000	1216500000	1066300000	1080800000	1486900000	1418400000	1344400000
GECWCVNPNTGK	12	0	1420.59	Q5IF07	Q5IF07	106	117	yes	2	0.01026	71.349	1	1	1	1	1	1	56400000	14671000	15243000	10398000	11717000	3201200	1170100
GEIFNHDHR	9	0	1123.52	F7C0D2	F7C0D2	249	257	yes	2;3	0.042176	85.731	2	2	1	2	2	2	281950000	66192000	59348000	61585000	45425000	48678000	718740
GELFWDDGETK	11	0	1295.57	F6PUW3	F6PUW3	854	864	yes	2	0.006602	84.213	1		1	1	1	1	25363000	7927800	8379200	0	7670800	0	1385500
GEQELLVPMSSAYPDR	16	0	1790.85	F6VJR6	F6VJR6	249	264	yes	2	6.1678e-06	120.6	1	1		2		1	1176500000	330100000	0	259350000	347920000	239100000	0
GESAGLVK	8	0	759.413	F6R3F4	F6R3F4	111	118	yes	1	0.021979	133.81	1	1		1	1	1	639870000	141170000	98013000	81618000	219300000	99757000	0
GESGGAVFLER	11	0	1120.55	F6PPQ0	F6PPQ0	671	681	yes	2	0.0024022	103.7	1	4	2	1	1	2	319670000	84231000	90046000	27152000	77347000	31589000	9304400
GEVLANSFTGGICK	14	0	1451.71	F6YQL3	F6YQL3	206	219	yes	2	0.00048038	89.548	1	1	1	1	1	1	175520000	43285000	32935000	23477000	42035000	25131000	8652200
GEWTCKPIAEK	11	1	1317.64	F7CN05;F7CN11;F7CS60	F7CN05	174	184	yes	2;3	2.9585e-05	150.35	2	1	1	1	2	2	474680000	55554000	170120000	198040000	33591000	13551000	3815300
GEWTCVAYSQLR	12	0	1468.68	F7CN05;F7CN11;F7CS60	F7CN05	503	514	yes	2;3	2.1068e-22	187.5	1	1	2	2	2	2	242850000	78673000	81326000	57515000	8673200	6397800	10267000
GFEPTLEALFGK	12	0	1307.68	F6YCW8;F6YE73;F6Z5E1	F6YCW8	655	666	yes	2	0.0014	142.92	1	1	1	1	1	1	561830000	100100000	129220000	89870000	105310000	99622000	37715000
GFEYSER	7	0	886.382	F6ZR63	F6ZR63	240	246	yes	2	0.030663	114.59			1				47846000	0	0	0	0	0	47846000
GFFPLGFPEPVK	12	0	1333.71	H9GZV1	H9GZV1	29	40	yes	2	0.0021902	98.055	1	1	1	1	1	1	1733700000	107310000	566950000	451500000	314060000	233270000	60603000
GFGSQLGEFWLGNDNIHALTAQGTSELR	28	0	3017.46	F6QQT6	F6QQT6	65	92	no	3	2.1311e-77	201.17	2	1	1	1		2	212320000	57088000	0	64945000	36799000	32860000	20627000
GFNCESKPEPEETCFDK	17	1	2072.85	F7CN05;F7CN11;F7CS60	F7CN05	83	99	yes	2;3	1.0791e-05	93.623	2	2	2	2	2	2	2143200000	704740000	709070000	513310000	94388000	65333000	56309000
GFSPPDVFVQWLQK	14	0	1646.85	H9GZN9	H9GZN9	352	365	yes	2;3	1.0423e-05	135.43	2	2	2	3	2	2	10978000000	3380200000	2618300000	1451300000	1510200000	1420400000	597240000
GFSSASQIFHSPDLAIK	17	0	1803.92	F7CZW9	F7CZW9	193	209	yes	2;3	5.6266e-21	209.11	2	2	2	2	2	2	4705400000	1138000000	1058700000	643260000	744320000	673180000	447970000
GFVLSLNR	8	0	904.513	F6RRV1	F6RRV1	55	62	yes	2	0.009199	126.24	1			1	1	1	45948000	12127000	19274000	9883200	4663800	0	0
GGFVMLSNEK	10	0	1080.53	F6Z352	F6Z352	162	171	yes	2	0.0019153	110.12	1	1	1	1	1	1	209600000	50631000	44690000	36378000	47008000	24120000	6774900
GGGALLGDR	9	0	814.43	F6Z5L1;F7A1L2	F6Z5L1	487	495	no	2	0.0019756	122.74	1	1		1	1	1	366890000	76665000	69086000	100070000	64540000	56527000	0
GGHQLYCVK	9	0	1060.51	F6YQL3	F6YQL3	891	899	yes	2;3	0.017376	100.19	2			1		2	38638000	5864700	0	22880000	9893200	0	0
GGPTSAPSVSLFPPSSEELSANK	23	0	2258.11	F6SP11	F6SP11	1	23	yes	2;3	9.203e-25	144.55	2	4	3	2	3	3	492940000	72056000	158500000	54020000	126630000	48116000	33610000
GGSAGFVSGLSYLELDNPAGNK	22	0	2152.04	F6Q7J3	F6Q7J3	378	399	yes	2	0.00079129	67.93			1				19366000	0	0	0	0	0	19366000
GGSFQLLK	8	0	848.476	F6RMD0	F6RMD0	46	53	yes	1	0.057586	77.741			1				6027600	0	0	0	0	0	6027600
GGSSGWGGGLTQSESIITYR	20	0	2011.96	F7CFN5	F7CFN5	389	408	yes	2	9.2328e-36	179.5	1	1	1	1	1	1	176570000	30244000	27603000	29151000	33492000	37985000	18101000
GGTLGTPQTGVENDALYEYLR	21	0	2253.09	F7AW05	F7AW05	102	122	yes	2;3	3.9396e-36	180.78	2	2	1	2	2	2	898690000	177810000	198160000	158220000	160780000	152890000	50837000
GGTNINDAVLLAVQLLER	18	0	1895.05	F6R3F4	F6R3F4	347	364	yes	2;3	1.2844e-208	317.99	2	2	1	2	2	1	1177000000	374990000	324680000	0	220900000	146310000	110140000
GGVASGFK	8	0	721.376	Q28372	Q28372	119	126	yes	2	0.056323	89.55	1	1	1	1	1	1	678330000	143060000	98749000	153880000	88775000	130370000	63502000
GGVNDNFQGVLQNVR	15	0	1615.81	F6YR34	F6YR34	202	216	yes	2;3	0.0037223	51.092	1	1	2	2	2	2	178060000	45875000	66321000	45475000	7444100	7333900	5616400
GGYIFPTQQPATTTVASR	18	0	1893.96	F6PUW3	F6PUW3	819	836	yes	2;3	0.00044667	55.864	2	2	1	2	2	2	208300000	55612000	42638000	47626000	37008000	22516000	2903700
GGYILPWQEPAQNTHLSR	18	0	2066.03	F6PUW3	F6PUW3	1715	1732	yes	3	0.00054893	54.805				1	1	1	126660000	37473000	44811000	44374000	0	0	0
GHENCMGAVVSEYFVLTAAHCFTVDDQK	28	0	3184.41	F6RMD0	F6RMD0	507	534	yes	4	5.4411e-07	65.275	1	1		1		1	26840000	6321000	0	10894000	4950600	4674500	0
GHFSVSVLVESDIAPIAR	18	0	1896.01	F6RI47;F6R942	F6RI47	522	539	yes	2;3	3.7904e-50	202.82	17	11	7	15	18	18	490440000	110390000	98614000	86519000	102950000	69386000	22579000
GHLFLQTDQPIYNPGQR	17	0	1983	F6XSF7	F6XSF7	145	161	yes	2;3	1.3064e-90	240.12	2	2	1	2	2	2	1404300000	295180000	290940000	265220000	275070000	210820000	67027000
GHMLENHIER	10	0	1234.59	F6QX36	F6QX36	555	564	yes	2;3	0.00054488	145.72	2	1	2	1	3	3	335150000	9662800	29883000	181900000	80676000	25360000	7667100
GHVLFR	6	0	727.413	F6QX36	F6QX36	230	235	yes	2	0.031049	123.07	2	1		1	1	1	94616000	27619000	4041300	16742000	29108000	17105000	0
GHVLFRPTVGQQQSCPTCSTSLLNGDFR	28	1	3161.51	F6QX36	F6QX36	230	257	yes	4	4.7749e-07	66.886			1	1	1	1	43601000	15047000	16892000	9532200	0	0	2130300
GHVSFKPSLDQQR	13	1	1497.77	F7AVY0;F7AE68	F7AVY0	222	234	yes	2;3;4	3.8743e-07	172.88	3		1	3	2	1	539570000	253780000	99485000	39964000	142950000	0	3394700
GIADFSGISQEGR	13	0	1335.64	F7DRS2	F7DRS2	319	331	yes	2	2.2739e-47	218.47	1	1	1	1	1	1	777620000	168130000	211760000	125970000	142120000	94602000	35047000
GIDSCDGDSGGAFAIQHPNEEAPK	24	0	2471.07	F7BQD6	F7BQD6	630	653	yes	2;3	2.9585e-21	130.83	2	2	2	2	2	2	776850000	175230000	114860000	136160000	147730000	148150000	54719000
GIEEELQFSLGSK	13	0	1435.72	F6XSF7	F6XSF7	1359	1371	yes	2	0.004715	81.017	1			1	1	2	87157000	13568000	25948000	38605000	9035500	0	0
GIFQVVSGGTVLQLDR	16	0	1687.93	F6TIN6;A0A3B0ITS7	F6TIN6	196	211	yes	2;3	1.4673e-32	228.12	2	2	2	2	2	2	497180000	131280000	58830000	82816000	76700000	71464000	76090000
GILAADESTGSIAK	14	0	1331.69	F6SX98	F6SX98	46	59	yes	2	0.00048734	114.83				1	1	1	34991000	12755000	14138000	8098100	0	0	0
GIPFFGQVCLVDGK	14	0	1535.78	F6QAD8;F6R6K3;F6R7S3	F6QAD8	363	376	yes	2	0.00045434	141.1	1	1		1	1	1	653410000	160260000	150180000	95572000	128700000	118690000	0
GIVAAFYSGPSQSNK	15	0	1524.76	F7A8N4	F7A8N4	546	560	yes	2	0.023392	51.092	1	1	1	1	1		34622000	13331000	9998900	0	6014300	4039000	1238500
GKWEKPFEPESTTEQDFHVDEK	22	2	2662.22	B5BV07;B5BV11;B5BV10;B5BV06;B5BV13;B5BV09;B5BV08;B5BV12;F7CSL8;F7CYP1;F7DXM5	B5BV07	219	240	no	3;4	6.9355e-23	133.38	5	5	6	3	4	3	1665100000	456280000	366120000	316980000	254130000	220190000	51430000
GLETSLAECTITK	13	0	1421.71	F7APU2;F7AU56	F7APU2	164	176	yes	2	3.7644e-06	166.93	1	1	1	1	1	1	989410000	188060000	216040000	145450000	199440000	192570000	47840000
GLEYLHFMR	9	0	1164.58	K9K287;F6QSE9;F6X814	K9K287	120	128	yes	2	0.054036	81.297						1	15104000	0	0	15104000	0	0	0
GLEYLHFMRK	10	1	1292.67	K9K287;F6QSE9;F6X814	K9K287	120	129	yes	2	0.060416	51.995				1			0	0	0	0	0	0	0
GLIDEVNQDFTNR	13	0	1519.73	F6RUZ6	F6RUZ6	73	85	yes	2	0.004717	87.298	1			1	1	1	88879000	43986000	15703000	15949000	13241000	0	0
GLPIKEDFLEQSEQLFGAK	19	1	2148.11	F6X449	F6X449	171	189	yes	2;3	9.9327e-09	162.48	2	2	1	2	2	2	721690000	143610000	101580000	123350000	144600000	156940000	51617000
GLQDEDGYR	9	0	1051.46	F6XSF7	F6XSF7	1611	1619	yes	2	1.8425e-14	186.43	2	2		1	1	2	1251600000	323120000	237040000	223600000	267410000	200450000	0
GLRPGVVYEGQLISVQHYGHK	21	1	2336.24	F7CN05;F7CN11;F7CS60	F7CN05	669	689	yes	3;4;5	9.4669e-06	92.474	1			3	3	2	182220000	63830000	61333000	55460000	1591200	0	0
GLVLVAFSQYLQQCPFEDHVK	21	0	2477.24	F7BAY6;Q5XLE4;P35747	F7BAY6	45	65	no	2;3;4;5	3.7261e-177	290.21	8	9	13	8	11	9	43807000000	5480800000	10178000000	6945400000	5884300000	5707200000	9611000000
GMYTCTAQGIWK	12	0	1414.64	F6Z5L1	F6Z5L1	425	436	yes	2	0.0094747	94.309	1	1	1	1	1	1	120240000	31308000	25526000	22579000	18982000	15791000	6051600
GNAQTFR	7	0	792.388	F7BSX5;F2VYZ0;Q0R0D7;D9MNN5;F7C2F9	F7BSX5	93	99	no	2	7.4788e-05	160.77	1		1	1	1	1	1970500000	277630000	959480000	274770000	351150000	0	107470000
GNDYDKQPWQAK	12	1	1448.67	F6RMD0	F6RMD0	487	498	yes	2	5.3776e-15	175.07	1	1		1	1	1	144340000	33320000	45014000	24522000	22498000	18985000	0
GNLCVNLMR	9	0	1075.53	F7BUV8	F7BUV8	177	185	yes	2	0.056198	73.324					1		7126300	0	7126300	0	0	0	0
GNPDGLQK	8	0	827.414	F6RZ27	F6RZ27	280	287	yes	2	0.030302	101.21	1	1		1		1	172490000	48783000	0	50416000	35994000	37296000	0
GNTKPIDQYIFELSAR	16	1	1850.95	F6T0P6	F6T0P6	338	353	yes	2;3	1.9429e-12	181.67	2	2	2	2	2	2	6914400000	918530000	1461000000	1082500000	1303900000	1203200000	945220000
GNVATEISIER	11	0	1187.61	F6YCW8;F6YE73;F6Z5E1	F6YCW8	156	166	yes	2	0.0047968	91.658				1	1		48205000	24677000	23528000	0	0	0	0
GPANEDGQK	9	0	914.409	F6REX3	F6REX3	632	640	yes	2	0.00028951	151.56		1	1	1	2	2	603470000	30275000	33015000	157490000	0	274400000	108290000
GPDPSSPAFR	10	0	1029.49	F6YR34	F6YR34	51	60	yes	2	4.925e-05	141.39			1	1	1	1	45669000	13854000	16730000	12572000	0	0	2513500
GPDVLSAK	8	0	785.428	F6R3F4	F6R3F4	500	507	yes	2	0.017465	113.5	1	1	1			1	146110000	0	0	49921000	59810000	27362000	9016800
GPEEEHLGILGPVIWAEVGDTIR	23	0	2486.28	F6PQ46	F6PQ46	439	461	yes	3	2.0026e-09	104.25	1	2	2	2	2	1	540370000	129710000	101220000	64268000	66704000	133270000	45195000
GPGCEVTDR	9	0	989.424	F7AXF6	F7AXF6	533	541	yes	2	0.00016844	155	1	1		1	1	1	454100000	100540000	105920000	82435000	75584000	89626000	0
GPGCEVTDRK	10	1	1117.52	F7AXF6	F7AXF6	533	542	yes	2	0.0047406	80.438					1		0	0	0	0	0	0	0
GPSTVDAAFSWDDK	14	0	1494.66	F6X1I8	F6X1I8	304	317	yes	2	2.4061e-06	175.15	4	5	1	4	4	4	861400000	113410000	212410000	166720000	190850000	126470000	51524000
GPTHEFSK	8	0	901.429	F6QAD8;F6R6K3;F6R7S3	F6QAD8	109	116	yes	2	1.8612e-19	198.92	1	1	1	1	1	1	576490000	95611000	94549000	118700000	127600000	120770000	19263000
GPTLQFINR	9	0	1044.57	F6REX3	F6REX3	106	114	yes	2	3.6671e-15	195.06	1	1	1	1		1	767470000	158740000	0	174220000	156870000	212670000	64959000
GPWCYTTDPGTR	12	0	1409.6	F6USP9	F6USP9	167	178	yes	2	3.0954e-05	142.92	1	1	1	1	1	1	1987300000	425110000	381360000	389800000	506030000	237270000	47732000
GPWCYTTDPSVR	12	0	1437.63	F6USP9	F6USP9	440	451	yes	2	0.008439	74.376	1	1		1	1	1	664460000	181420000	157880000	117200000	153420000	54541000	0
GQCSGEVTLPDCPR	14	0	1574.68	F7B3I5	F7B3I5	75	88	yes	2	3.487e-37	199.68	1	1	1	1	1	1	324690000	68738000	40271000	77837000	54773000	66675000	16397000
GQELCADYSENTFTEYK	17	0	2053.86	F6T0P6	F6T0P6	403	419	yes	2;3	3.6474e-62	216.84	19	18	13	14	13	17	1234500000	177740000	258910000	230870000	206640000	218970000	141390000
GQELCADYSENTFTEYKK	18	1	2181.95	F6T0P6	F6T0P6	403	420	yes	3	0.024406	36.856	1	1		1	1	1	86788000	19349000	36838000	9484100	8696800	12420000	0
GQETADFAPGDVGDLQETAK	20	0	2047.93	F7ABC9	F7ABC9	125	144	yes	2;3	2.083e-27	160.87	2	2	2	2	2	2	373530000	104350000	109230000	64882000	37036000	46113000	11921000
GQGASPVAMQK	11	0	1072.53	F6ZSZ5;F6ZT22;F6ZT60	F6ZSZ5	342	352	yes	2	0.034147	59.35	1			1	1	1	40695000	9015100	11315000	12788000	7577500	0	0
GQGTLSVVTVYQAK	14	0	1449.78	F7BTW7;F7E454;F7CJG3	F7BTW7	1339	1352	yes	2	0.00045769	97.472		1		1	1		104620000	51649000	52972000	0	0	0	0
GQIVSVNR	8	0	871.488	F6XSF7	F6XSF7	519	526	yes	2	0.00050457	153.15	1	1		1	1	1	1750700000	459250000	435030000	269420000	369440000	217570000	0
GQPLSSDK	8	0	830.413	H9GZN9	H9GZN9	366	373	yes	2	0.049165	91.9	1	1			1	1	14397000000	0	4136700000	3525500000	4349000000	2385800000	0
GQQYQGR	7	0	835.394	F7BFJ1	F7BFJ1	219	225	yes	2	0.017111	124.86	1	1		1	1	1	5019800000	917170000	824690000	1092500000	1016800000	1168600000	0
GRGENYR	7	1	850.405	F6USP9	F6USP9	284	290	yes	2	4.0909e-11	186.11	1	1	1	1	1	1	1152600000	196320000	221080000	268760000	248960000	182570000	34935000
GSDSVFSGFLLFPD	14	0	1486.7	F7DBT2;A0A3B0ITF5	F7DBT2	232	245	yes	2	0.0022482	72.643	1	1		1	1	1	248850000	54887000	67351000	61250000	31753000	33614000	0
GSEMVVAGK	9	0	876.438	F6R3F4	F6R3F4	487	495	yes	2	0.0061066	113.5	1	1	1	1	1	1	1760200000	537340000	627270000	152650000	239660000	144200000	59086000
GSFACQCPPGYQK	13	0	1498.63	F6T0M8;F6PVG3	F6T0M8	192	204	yes	2	0.0088456	67.414	1	1	1	1	1	1	137070000	21642000	23224000	26376000	33482000	28960000	3386900
GSFPWQAK	8	0	919.455	F6XWM5	F6XWM5	111	118	yes	1	0.00055088	156.4	1	1		1	1	1	1235400000	323430000	321240000	224250000	209370000	157080000	0
GSISQSGIHVLSIK	14	0	1424.8	F6REX3	F6REX3	501	514	yes	2;3	0.00052707	138.24	2	2	1	2	2	2	2412500000	446030000	564030000	405530000	454120000	450810000	91944000
GSLGTSGQTCR	11	0	1122.51	F7C0I7;F7DMY7	F7C0I7	860	870	yes	2	0.0027369	111.61		1		1	1	1	24567000	6994400	4466200	7842400	0	5263600	0
GSLVPASAANLQAAR	15	0	1424.77	F6QX36	F6QX36	342	356	yes	2;3	5.6343e-06	159.83	3	2	2	2	2	2	1642300000	323380000	327140000	269440000	263990000	267980000	190400000
GSMNHNLVSER	11	0	1242.58	F6YCW8;F6YE73	F6YCW8	1906	1916	yes	2	0.0082833	82.417	1	1	1			1	19657000	0	0	7636500	0	10137000	1883500
GSNTATLR	8	0	818.425	F6ZVH5	F6ZVH5	1872	1879	yes	2	0.00093043	147.34	1	1	1	1	1	1	180450000	19564000	38886000	51230000	30774000	39871000	128180
GSSEITR	7	0	748.372	F6RI47;F6R942	F6RI47	339	345	yes	2	0.031253	114.19		1	1	1	1		6977100000	2136400000	2198900000	0	0	14554000	2627300000
GSVEFPVGDAVSK	13	0	1290.65	F6XSF7	F6XSF7	923	935	yes	2	0.0010593	97.734	1	1		1	1	1	1621500000	541520000	457680000	176370000	283270000	162660000	0
GSVHQNFADFTFATGK	16	0	1725.81	F6PJI3	F6PJI3	349	364	yes	3	0.0032822	49.049	1	1	1			1	28038000	0	0	7426700	11710000	6144700	2757100
GSVPPPSAR	9	0	866.461	F6PQ46	F6PQ46	499	507	yes	2	0.013671	102.51	2	1		2	2	2	934040000	243400000	243890000	181420000	159690000	105640000	0
GSVQHLPELDDGKPK	15	1	1618.83	F6RRV1	F6RRV1	291	305	yes	2;3;4	0.00012449	80.917	2	2		3	2	2	530870000	136910000	178210000	89993000	77208000	48557000	0
GTAGTTISGAR	11	0	990.509	F7DGR1	F7DGR1	227	237	yes	2	6.709e-13	180.44	1	1		1	1	1	899270000	217250000	261890000	162300000	153620000	104220000	0
GTEAAGATIVEAIR	14	0	1357.72	F7CSL8;F7CYP1	F7CSL8	371	384	yes	2;3	8.8901e-60	231.42	15	10	10	9	10	15	5778200000	1285400000	1215400000	1099400000	1441900000	563130000	173010000
GTEAAGTTMWEIMPISLPPDLK	22	0	2357.16	B5BV04;B5BV07;B5BV06;F7BF31	B5BV07	371	392	no	2;3	1.6231e-12	155.57	4	3	2	6	4	3	2043500000	1120700000	335590000	165630000	218970000	183360000	19236000
GTFAQLSELHCDK	13	0	1504.7	A0A1K0FUK6	A0A1K0FUK6	84	96	yes	2;3	1.6064e-06	146.17	2	2	2	2	2	2	3934200000	1402700000	669120000	480350000	514300000	680720000	187070000
GTPEVESWNAAQHCR	15	0	1740.76	F6QYS3	F6QYS3	143	157	yes	2;3	8.3224e-12	150.49	2	2	2	2	2	2	968060000	252670000	189910000	189210000	204320000	93698000	38253000
GTPSGILYKPSSEEER	16	1	1748.86	F7BXD8	F7BXD8	56	71	yes	2;3	0.00020387	101.39	2	2	2	3	3	1	1572400000	406500000	457440000	156250000	263920000	172200000	116120000
GTPSGILYKPSSEEERK	17	2	1876.95	F7BXD8	F7BXD8	56	72	yes	2;3;4	1.2856e-05	87.388	1	2	2	3	4	3	572750000	140260000	295820000	60387000	23093000	44936000	8251000
GTSSITVTGK	10	0	949.508	F6USP9	F6USP9	393	402	yes	2	0.0026315	106.93	2	2	1	1	2	2	1683300000	181970000	441260000	307640000	284740000	277290000	190440000
GTVAITTAGLPCQR	14	0	1443.75	F7BK76	F7BK76	120	133	yes	2	7.9191e-05	131.28	1	1		1	1	1	43048000	14537000	15257000	7025900	0	6228400	0
GTVYNYR	7	0	871.419	F7D7B5	F7D7B5	815	821	yes	2	0.041832	105.42	1	1		1	1	1	388160000	51445000	51898000	146030000	39269000	99516000	0
GTWEKPFEPESTTEQDFHVDEK	22	1	2635.17	B5BV04	B5BV04	219	240	yes	2;3;4	1.1036e-28	165.9	9	6	10	9	12	12	8649100000	2769700000	1740500000	1093300000	1404500000	808990000	832060000
GTWEKPFEPEYTTEQDFHVDEK	22	1	2711.2	F7BF31	F7BF31	219	240	no	3;4	3.0627e-46	186.89	11	11	7	16	14	10	6538100000	1207700000	1134000000	1455900000	1105600000	1255900000	378900000
GTWTQLPQCIATDELAK	17	0	1930.95	F6UHF2;F7E3H8	F6UHF2	160	176	no	2;3	2.7824e-12	164.48	2	2	2	2	2	2	4723100000	826580000	611280000	843240000	1159300000	846210000	436500000
GTYIPVPVVSELQSGK	16	0	1672.9	F6UZI2	F6UZI2	122	137	yes	2	1.0612e-05	115.92	1	1		1	1	1	179200000	29636000	17549000	36069000	54922000	41027000	0
GVDWSDPLPVCVIAK	15	0	1654.84	F7BNQ2	F7BNQ2	165	179	yes	2;3	3.2767e-05	133.89	2	2	2	3	2	2	5917200000	1281000000	1226100000	1031200000	1127100000	891480000	360300000
GVFVLNK	7	0	775.459	F7BLE3;F7BTW7;F7E454;F7CJG3	F7BTW7	599	605	no	2	0.02381	119.23	1	1		1	1	1	1843500000	404990000	431170000	331390000	344710000	331270000	0
GVGQAAIR	8	0	770.44	F6ZSZ5;F6ZT22;F6ZT60	F6ZSZ5	513	520	yes	2	0.044924	118.06				1			12281000	12281000	0	0	0	0	0
GVNTDSGSICR	11	0	1164.52	F6Y2H3;F6Y2V7	F6Y2H3	148	158	yes	2	3.7566e-07	156.92	1	1		1	1	1	102020000	29470000	24894000	18486000	17270000	11904000	0
GVPMPNK	7	0	741.384	F6RI47;F6R942	F6RI47	376	382	yes	1;2	0.03751	109.94	2	2	2	2	2	2	14584000000	3301800000	3631300000	2560000000	3476400000	1473100000	141790000
GVTFLLR	7	0	804.486	F6VJR6	F6VJR6	148	154	yes	2	0.0045401	142.53	1	2	2	1	2	2	1644700000	319950000	418570000	252350000	291850000	240640000	121300000
GVVGGSVAVLCPYNPK	16	0	1615.84	F6W1N4;F6W2K5	F6W1N4	360	375	yes	2	2.6442e-05	90.108	1		1	1	1	1	85001000	17399000	29282000	16469000	19328000	0	2522800
GWNLMNQGASGVK	13	0	1360.66	F6Z352	F6Z352	426	438	yes	2	0.0011786	113.93	1	1	1	1	1	1	170290000	29986000	41725000	31808000	31461000	29876000	5435600
GYDFCSER	8	0	1032.4	F6Q4N3	F6Q4N3	400	407	yes	2	0.031309	100.19		1			1		18688000	0	8133300	0	0	10555000	0
GYHLNDEGTR	10	0	1160.52	F7ABC9	F7ABC9	325	334	yes	2;3	0.0042828	108.74	2	2	2	2	2	2	543460000	118050000	128440000	114190000	100390000	74153000	8242900
GYQLSDVDGVTCEDIDECALPTGGHICSYR	30	0	3386.45	F7ABC9	F7ABC9	449	478	yes	3	1.1652e-12	89.181			1	1	1	1	107390000	38690000	16649000	40830000	0	0	11223000
GYSFTTTAER	10	0	1131.52	F6T3Y8;F7A5E3;F7AAK7;P60708	P60708	197	206	no	2	1.5027e-13	184.49	1	1	1	1	1	1	262970000	50886000	49234000	58990000	49510000	40087000	14260000
GYSFVTTAER	10	0	1129.54	F7CZ92;F7CW82;F6R1X9;F6Z8K0;K9K3B5	F7CZ92	199	208	yes	2	0.038128	73.985					1		57908000	0	57908000	0	0	0	0
GYSQYAYDGADYLALNEDLR	20	0	2296.03	F7BSX5	F7BSX5	136	155	yes	2	7.147e-12	146	1	1	1	1	1		114430000	22862000	7811400	0	20750000	25313000	37694000
GYTQQLAYR	9	0	1098.55	F7BTW7;F7E454;F7CJG3	F7BTW7	1051	1059	yes	2	9.4112e-10	181.68	1	1	1	1	1	1	9790900000	1873700000	1771900000	1907700000	2261700000	1781400000	194560000
GYVGWYQQIPGTAPK	15	0	1663.84	A0A0A1E439	A0A0A1E439	52	66	yes	2	3.2452e-05	110.84	1	1	1	1	1	1	247730000	26952000	48915000	71288000	47142000	38756000	14677000
HADPDFTK	8	0	929.424	F7DL17;F7CTJ3;F7DAF6	F7DL17	574	581	yes	2	0.00093043	147.34	1	1	1	1	1	1	2137700000	598450000	549290000	407360000	266240000	285240000	31164000
HADPDFTKK	9	1	1057.52	F7DL17;F7CTJ3;F7DAF6	F7DL17	574	582	yes	3	0.0019273	101.9	1	1		1		1	66316000	15108000	0	14957000	9219500	27032000	0
HADSTAELGEQIDNLQR	17	0	1895.9	F6SUC3	F6SUC3	1197	1213	yes	2	0.00033552	67.153					1		5518600	0	5518600	0	0	0	0
HAFAGVGSGESASGEAFHVEKPPK	24	1	2395.16	F7C450	F7C450	309	332	yes	2;3;4;5	1.5958e-93	222.92	29	31	21	18	22	28	13940000000	3566800000	2704700000	2399400000	2427100000	2264800000	577590000
HAMWIDCGIHAR	12	0	1465.67	F6PSH3	F6PSH3	172	183	yes	3	0.0031871	67.385	1			1	1		18304000	5519900	7822900	0	4961500	0	0
HASLQTTSTGSGPFTDVR	18	0	1860.9	F7CN05;F7CN11;F7CS60	F7CN05	272	289	yes	2;3	2.8555e-63	166.62	1	2	2	2	4	2	570380000	147470000	226120000	153040000	1854300	25968000	15931000
HAVILLTDGK	10	0	1065.62	F6PPQ0	F6PPQ0	363	372	yes	2	2.3365e-17	217.02	2	2	1	2	2	2	543550000	134850000	129310000	58437000	144170000	64176000	12615000
HCEFDK	6	0	834.333	F6ZEH8;P27425	P27425	497	502	no	2	9.4381e-07	177.57	2	2	2	1	1	1	44956000000	7507200000	10259000000	8551400000	9796900000	6498200000	2342600000
HCLVSVEK	8	0	970.491	F6Z352	F6Z352	448	455	yes	1;2	0.0010818	144.38	2	1	1	1	1	2	535000000	63043000	77414000	111230000	149180000	122020000	12108000
HCYNIQR	7	0	989.45	F6SP74	F6SP74	368	374	yes	2	0.0094995	132.8	1	1	1	1	1	1	495080000	108690000	48625000	140380000	65406000	125400000	6577600
HESAISLIK	9	0	996.56	F6YCW8;F6YE73;Q7YQQ6	F6YCW8	3366	3374	yes	2	1.9264e-11	176.6	1	3	1	1	1	2	337310000	62669000	65511000	69535000	81397000	51781000	6417700
HFCGGTLISPEWVLTAAHCLER	22	0	2553.23	F6USP9;P80010	F6USP9	612	633	yes	4	8.1574e-06	89.483	2	2		1	1	1	53545000	7182900	9209900	11453000	10947000	14752000	0
HFGPDAFGGLPR	12	0	1269.63	F6QFD9	F6QFD9	87	98	yes	2;3	8.7786e-09	158.76	2	2	2	2	2	2	348810000	88915000	66597000	62955000	63783000	51157000	15400000
HFVPGDPFLLQALVR	15	0	1707.95	F6XSF7	F6XSF7	383	397	yes	3	4.3593e-09	145.31	1	1	1	2	2	2	188840000	47673000	45509000	32370000	20461000	17223000	25602000
HFWQGDEPQSSWDR	14	0	1773.75	F6Z2L5	F6Z2L5	20	33	yes	2;3	9.7186e-23	190.15	2	2	2	4	3	2	927390000	236320000	280360000	111260000	167990000	112550000	18908000
HGDSVEFTCR	10	0	1206.51	F6ZR63	F6ZR63	711	720	yes	2;3	1.9529e-164	320.89	4	4	1	5	2	3	3675600000	673550000	704670000	619780000	922990000	708810000	45785000
HGEDCEPAVSR	11	0	1255.53	F6ZI35	F6ZI35	83	93	yes	2;3	3.3795e-166	322.72	4	3	6	3	5	5	28686000000	5604100000	5848800000	6979100000	4502200000	4882000000	869810000
HGGGVAMDGQDVQIPLLQGDLR	22	0	2275.14	F7BAT4;A0A061DBP6	F7BAT4	443	464	yes	3	1.5295e-18	100.28				1	1		34945000	21568000	13377000	0	0	0	0
HGLSESER	8	0	913.425	F6Z5L1	F6Z5L1	417	424	yes	2	8.7259e-38	224.43	1		1	1	1	1	1283000000	345960000	375890000	312280000	182730000	0	66170000
HGPTITAK	8	0	823.455	F6UZH0	F6UZH0	142	149	yes	2	0.00017999	157.58	1	1	1	1	1	1	3992900000	1058600000	752960000	644840000	861170000	557280000	118050000
HGTDDGVVWMNWK	13	0	1543.69	F6PH38	F6PH38	458	470	yes	3	0.00020544	89.805	1			1			20818000	17221000	0	0	3596900	0	0
HGTECTLCQCK	11	0	1392.56	F6Q4N3	F6Q4N3	793	803	yes	3	0.0061095	50.452	1	1		1	1	1	37812000	5642400	6187700	10813000	7695800	7472900	0
HHDGSYSTFGER	12	0	1391.59	F6RI47;F6R942	F6RI47	1024	1035	yes	2;3	1.944e-16	211.27	11	14	9	14	16	15	18692000000	4946900000	4924900000	2268200000	4343000000	2059200000	149700000
HHPEHTGGRPR	11	1	1279.63	F7CN05;F7CN11;F7CS60	F7CN05	1391	1401	yes	3	0.0041998	83.862	1	1		1	1	1	33234000	10714000	11464000	741100	2711400	7602900	0
HILNIK	6	0	736.46	F6YCW8;F6YE73;F6Z5E1	F6YCW8	111	116	yes	2	0.028977	136.19	1			1	1	1	150460000	52345000	46146000	8432400	43538000	0	0
HIQLGR	6	0	722.419	F7D7B5	F7D7B5	718	723	yes	2	0.032987	120.06	1	1	1	1	1	1	1360000000	407710000	322660000	209850000	222900000	175870000	20987000
HLDFNTLVDNISVDPVTGDLWVGCHPNGK	29	0	3218.55	F7DTV1	F7DTV1	261	289	yes	4	0.00057334	42.472	1						9629200	0	0	0	9629200	0	0
HLEDTLTK	8	0	955.497	F7BF31;F7CSL8;F7CYP1;F7DXM5	F7DXM5	290	297	no	2	1.6311e-13	194.44	2	1	1	2	3	3	4109000000	1047000000	975490000	1708600000	20435000	0	357450000
HLIFENTR	8	0	1028.54	A0A1L1R2Y5	A0A1L1R2Y5	307	314	yes	2	0.01322	117.17	1			1	1		41806000	18251000	15964000	0	7591200	0	0
HLSLLTIMSNR	11	0	1283.7	F6T0P6	F6T0P6	208	218	yes	2;3	6.2204e-35	213.53	5	4	4	6	7	4	1016100000	172010000	296630000	193530000	119390000	112150000	122420000
HLSQGNTSPSR	11	0	1182.57	F7DZ01	F7DZ01	237	247	yes	2;3	3.8884e-18	185.6	2	2		2	2	1	419650000	112890000	83917000	90059000	51077000	81713000	0
HLVCNGDR	8	0	969.445	F7CFN5	F7CFN5	74	81	yes	2	0.00012297	158.36	1	1		1	1	1	404110000	85019000	89021000	88479000	73442000	68153000	0
HLVVSAPGR	9	0	934.535	F7DRS2	F7DRS2	52	60	yes	2	4.9971e-05	158.36	1	1		1	1	1	352870000	67384000	125240000	46435000	65804000	48004000	0
HLYVLEFSDNPGFHEPLEPEVK	22	0	2595.26	F6WZA8	F6WZA8	39	60	yes	3	1.2011e-08	101.17	1	1		1	1	1	92930000	14267000	20401000	26482000	10970000	20810000	0
HNIELR	6	0	780.424	F6UHF2;F6ZR63;F6U1J0;F7E2N9	F6ZR63	1182	1187	no	2	9.8845e-07	177.23	1	1	1	1	1	1	11145000000	3595200000	1780300000	1445500000	2652000000	1604000000	68359000
HPDLVEK	7	0	836.439	F6PSH3	F6PSH3	140	146	yes	2	0.0051978	140.98	1	1	1	1	1	1	485990000	125460000	123960000	49776000	113200000	61753000	11838000
HPDYSVSLLLR	11	0	1298.7	F7BAY6;Q5XLE4;P35747	F7BAY6	361	371	no	2;3	2.8545e-219	310.37	54	10	9	65	52	52	4448600000	1166700000	1016600000	244600000	237540000	1311100000	472130000
HPELSTPELLR	11	0	1290.69	F7B3I5	F7B3I5	362	372	yes	2	0.0059777	89.247	1			1			0	0	0	0	0	0	0
HPGSSEPGSDGLQK	14	0	1394.64	O97641	O97641	284	297	no	2;3	1.4406e-28	184.71	3	2	1	2	2	2	191840000	42596000	83992000	23166000	33839000	4047600	4198700
HPPSVYVLPPTR	12	0	1361.75	H9GZN9	H9GZN9	324	335	yes	2;3	0.00040928	137.98	8	5	3	7	7	6	11265000000	3706000000	2382800000	1915300000	1919000000	1128100000	213430000
HPYFYGPELLFHAEEYK	17	0	2139.01	F7BAY6;Q5XLE4;P35747	F7BAY6	169	185	no	2;3;4	3.3018e-124	265.53	11	7	11	11	11	12	14452000000	1666000000	1695600000	2160300000	1520500000	1595200000	5814800000
HQGQWGTVCK	10	0	1199.55	F7BXD8	F7BXD8	139	148	yes	2;3	1.7549e-17	189.38	2	2	2	3	3	2	1561600000	153580000	299740000	427720000	389260000	255970000	35310000
HQGVMVGMGQK	11	0	1170.56	F6T3Y8;F7AHF3;F7AAK7;F7CZ92;F7CW82;F6R1X9;F6Z8K0;P60708	F7CZ92	42	52	no	2	0.002492	114.28	1	1		1	1	2	83818000	8671700	13502000	42359000	4530500	14755000	0
HQPQEFPTYVEPTNEEICEAFR	22	0	2720.22	F6T0P6	F6T0P6	128	149	yes	2;3;4	4.0706e-118	314.57	2	3	2	3	2	3	8278000000	1020500000	953960000	1457400000	1224800000	1774800000	1846600000
HQSVFTVTR	9	0	1073.56	F7DBT2;A0A3B0ITF5	F7DBT2	118	126	yes	3	0.010581	80.231	1	1		1		1	0	0	0	0	0	0	0
HQTVEQNTDGR	11	0	1283.59	F6ZEH8;P27425	P27425	562	572	no	1;2;3	4.9572e-122	290.2	3	3	4	3	3	3	42186000000	1218100000	19440000000	9326200000	1229100000	844340000	10128000000
HQTVEQNTDGRNPDDWAK	18	1	2109.95	F6ZEH8;P27425	P27425	562	579	no	2;3;4	1.6743e-38	190.46	3	5	3	3	2	3	4355600000	1189200000	1439000000	411840000	549480000	681940000	84194000
HSCQAECSNELYTEPSGYVSSLEYPQPYPPDLR	33	0	3872.69	F6Z5L1	F6Z5L1	187	219	yes	3	1.0213e-07	53.987		1					12119000	0	0	0	0	12119000	0
HSDGSYSTFGDHDGR	15	0	1636.65	F6REX3	F6REX3	1029	1043	yes	2;3	1.3057e-96	321.71	2	4	1	2	3	4	2844300000	622600000	713370000	582550000	519990000	392250000	13492000
HSGGDEDIYTYGSSVTYSCDPHFSMIGK	28	0	3109.31	F7BSN5;F6ZD61	F7BSN5	160	187	yes	3;4	3.314e-33	136.77	2	2	1	2	2	2	415000000	75129000	69226000	56752000	89553000	94438000	29906000
HSGVPDR	7	0	766.372	A0A0A1E6J6	A0A0A1E6J6	69	75	yes	2	0.0021416	149.48	1	1	2	1	1		7106500000	2304500000	4750600	0	1687400000	2562700000	547150000
HSLGFCDTNSR	11	0	1292.56	F6TIN6;A0A3B0ITS7	F6TIN6	185	195	yes	2;3	1.3407e-06	150.08	1	2		3	3	2	225290000	18907000	39981000	72997000	23548000	69853000	0
HSPGGTPTSIK	11	0	1080.56	F6PR90	F6PR90	170	180	yes	2	0.0061358	86.136	1	1	1	1		1	129400000	24153000	0	24192000	23109000	39126000	18816000
HSQSICEEFSQQADNEGCFTQFVK	24	0	2875.22	F6REX3	F6REX3	280	303	yes	3	2.8586e-95	234.23	1	1	1	1	1	1	476040000	100850000	98588000	70498000	60422000	85714000	59966000
HSSFVNVHLPK	11	0	1263.67	B5BV04;B5BV07;B5BV11;B5BV10;B5BV06;B5BV13;B5BV09;B5BV08;B5BV12;F7BF31;F7DXM5	B5BV07	307	317	no	2;3	1.1796e-07	155.11	11	5	3	7	9	5	3358800000	898180000	1007000000	381760000	740150000	271450000	60309000
HSTCVNGR	8	0	929.414	F6UHF2;F6ZR63;F7E3H8	F6ZR63	787	794	no	2	2.305e-05	164.89	1	1	1	1			624670000	179100000	0	0	272820000	56000000	116760000
HSTVLENLPQEADR	14	0	1607.79	F6ZEH8;Q9TQV8;P27425	P27425	228	241	no	2;3	6.6543e-139	288.35	2	2	2	2	2	2	5405600000	782820000	635660000	776050000	2477000000	474780000	259310000
HSTVLENLPQEADRDEYQLLCR	22	1	2685.28	F6ZEH8;Q9TQV8;P27425	P27425	228	249	no	2;3;4	1.2101e-249	371.36	5	7	7	6	7	4	26253000000	3876400000	6238200000	4703800000	3369500000	5775600000	2289500000
HTNLGPLEAK	10	0	1078.58	F7CFN5	F7CFN5	434	443	yes	2	1.3491e-34	219.5	1			1	1	1	379560000	144950000	60174000	70352000	104080000	0	0
HTTVFENLPDR	11	0	1327.65	F6PKE1	F6PKE1	219	229	yes	2;3	3.3614e-19	164.64	2	2	1	2	2	2	1687000000	313450000	443510000	381450000	303070000	233480000	12084000
HVILLMTDGLHNMGGDPVPVIHEIR	25	0	2762.44	F6RMD0	F6RMD0	382	406	yes	4	1.6469e-08	84.762	2	2	1	1	1	2	162920000	25843000	20562000	53166000	34448000	27173000	1725800
HVLNQIDK	8	0	965.529	F7C450	F7C450	58	65	yes	2	2.6246e-05	163.9	2	1	1	1	1	1	50284000000	11450000000	11983000000	8550500000	10397000000	6783400000	1120500000
HVSEAICK	8	0	942.459	F6YCW8;F6YE73;F6Z5E1	F6YCW8	214	221	yes	2	0.005628	126.28	1	1		1	1	1	2166000000	326000000	599420000	499910000	470590000	270080000	0
HVSLLR	6	0	723.439	F7AXF6	F7AXF6	88	93	yes	2	0.041059	113.07	1	1		1	1	1	172040000	43983000	25884000	43490000	24254000	34429000	0
HVVPNEVVVQR	11	0	1274.71	Q28372	Q28372	127	137	yes	2;3	8.413e-13	179.37	6	3	4	7	5	6	5678000000	1891900000	2184900000	249220000	852990000	169870000	329180000
HWADLVLSYVGPQHAGK	17	0	1876.96	F6VJR6	F6VJR6	456	472	yes	2;3	2.3738e-08	102.65	2	1	1	2	1	2	584940000	92850000	120490000	124720000	64215000	48917000	133750000
HYEGSTVPEK	10	0	1145.54	F6XWM5	F6XWM5	252	261	yes	2;3	8.593e-12	176.6	5	3	4	5	5	5	54791000000	12054000000	6104300000	10788000000	15489000000	7661800000	2693000000
HYEGSTVPEKK	11	1	1273.63	F6XWM5	F6XWM5	252	262	yes	2;3	1.4306e-12	209.73	2	2	2	2	2	2	30254000000	3111000000	10133000000	5126300000	3482800000	6472600000	1927800000
HYLQVFNPIK	10	0	1257.69	F6PQ46	F6PQ46	903	912	yes	2;3	2.1581e-08	199.07	2	2	1	2	2	2	1470900000	459760000	369020000	185110000	252570000	177990000	26412000
HYLTIR	6	0	801.45	F6PUW3	F6PUW3	711	716	yes	2	0.0052358	155.81	1			1			42823000	20623000	0	0	22200000	0	0
HYQINQQWER	10	0	1400.66	F7CN05;F7CN11;F7CS60	F7CN05	57	66	yes	2;3	1.2431e-12	183.47				2	2	2	406190000	118250000	126890000	161050000	0	0	0
HYYIAAEEIIWDYAPSGIDTFTK	23	0	2702.29	F6PQ46	F6PQ46	372	394	yes	3	4.8163e-06	85.945		2	1	1	2	2	51914000	2700100	16545000	11188000	0	6742400	14738000
IADAHVDK	8	0	867.445	F6ZI35	F6ZI35	51	58	yes	2	0.0011181	143.61	1	1		1	1	1	15716000000	3318500000	2870100000	3139100000	4205300000	2183200000	0
IADCGAPAELEHGLVTFPTR	20	0	2153.06	F6RPL1	F6RPL1	364	383	yes	3	2.0532e-12	112.55	1	1	1	1	1	1	206990000	48090000	23914000	33793000	42083000	36951000	22164000
IADFELPTITVR	12	0	1373.76	F6YCW8;F6YE73;G5CW75	F6YCW8	3803	3814	yes	2	4.8743e-12	200.78	1	1	1	1	1	1	302260000	55853000	65886000	52045000	62216000	33110000	33145000
IADLTSGLIGGEDGR	15	0	1472.75	F7A8N4	F7A8N4	744	758	yes	2	0.00047721	75.695	1	1	1	1	1	1	103450000	19230000	30436000	16916000	17253000	14810000	4800200
IAKTYEATLEK	11	1	1265.69	F7BAY6;Q5XLE4;P35747	F7BAY6	372	382	no	2;3	0.0017222	157.14	2	1	1	2	2	1	380170000	61099000	136690000	10394000	129730000	30227000	12019000
IAPNLADFAFSLYR	14	0	1596.83	B5BV04;B5BV07;B5BV11;B5BV10;B5BV06;B5BV13;B5BV09;B5BV08;B5BV12;F7BF31;F7CSL8;F7CYP1;F7DXM5	B5BV07	53	66	no	2;3	1.0441e-14	215.06	2	2	2	2	2	2	413280000	110270000	78492000	44841000	93296000	52309000	34071000
IAPQLSTEELTFLGK	15	0	1645.89	F7B3I5	F7B3I5	438	452	yes	2	7.541e-08	141.73	1	1	1	1	1	1	1464100000	312070000	234920000	245560000	260700000	218660000	192200000
IAQDGMSTSATTNLK	15	0	1536.75	F6YCW8;F6YE73	F6YCW8	1605	1619	yes	2	0.056406	44.188		1				1	28507000	0	0	16103000	0	12404000	0
IAQWQNLK	8	0	999.55	F6RI47;F6R942	F6RI47	175	182	yes	2	3.625e-06	170.94	1	1	1	1	1	1	10593000000	1761800000	2485600000	1750800000	2119000000	1793000000	683220000
IAQYYYTFK	9	0	1195.59	F7C7J6	F7C7J6	35	43	yes	2	0.050665	82.426					1		12912000	0	12912000	0	0	0	0
ICPGCPIDIPVNSPELEEPLNHSIAK	26	0	2898.43	F7C0D9;F7C0Z0	F7C0D9	265	290	yes	3	6.9222e-25	132.86	1	1	1	1	1	1	985930000	131590000	115490000	147220000	238160000	200140000	153320000
ICVDPQAPLYK	11	0	1302.66	F6RMK1	F6RMK1	87	97	yes	2;3	0.0035242	98.044		1		2	1	1	1921000000	809800000	901870000	208540000	0	805260	0
IDQSVEQLR	9	0	1086.57	F6RZ27	F6RZ27	212	220	yes	2	2.9441e-41	230.59	1	1	1	1	1	1	1128700000	130000000	227180000	210640000	274560000	256590000	29754000
IDSLLENDR	9	0	1073.54	Q29482	Q29482	158	166	yes	2	2.9441e-41	230.59	2	1	1	1	1	1	1436200000	223080000	191490000	370560000	277970000	262300000	110770000
IEDANLIPPVPDDKFQDLVDAVR	23	1	2578.33	F6YR34	F6YR34	61	83	yes	3	1.0262e-06	95.926				1	1	1	67362000	23753000	21983000	21625000	0	0	0
IEDSFSVK	8	0	923.46	F7CYR1	F7CYR1	358	365	yes	2	0.020348	111.01	1	1		1	1	1	2849700000	469090000	652180000	459270000	703730000	565420000	0
IEEIDCK	7	0	905.416	F6YQL3	F6YQL3	135	141	yes	2	0.035728	124.37	1	1	1	1	1	1	61375000	12228000	14803000	10985000	15749000	0	7610100
IEGNLIFDPNNYLPTESMLK	20	0	2307.15	F6YCW8;F6YE73;F6Z5E1	F6YCW8	614	633	yes	2	0.0014471	73.156			1				27986000	0	0	0	0	0	27986000
IEHGTIESSK	10	0	1099.55	F6U1J0	F6U1J0	154	163	yes	2;3	2.3463e-08	168.83	2	2	1	2	2	2	3449500000	817890000	719480000	673030000	600000000	598940000	40183000
IEHSFEVIEYVLPK	14	0	1701.9	F6REX3	F6REX3	212	225	yes	2;3	6.5476e-05	133.81	2	2		2	2	2	102340000	19725000	22377000	23359000	14792000	22091000	0
IEHYEQQIQAFR	12	0	1560.77	P48770;F6UFT2	P48770	214	225	yes	2;3	2.2358e-08	120.99	2	3	2	2	2	2	1063900000	255990000	270140000	185800000	203360000	97529000	51054000
IETQDIEASSYR	12	0	1410.66	F7A692	F7A692	85	96	yes	2	1.3861e-30	204.34	1	1	1		1	1	681650000	0	167670000	156030000	183220000	142420000	32300000
IFEGNTNIK	9	0	1034.54	F7DZ01	F7DZ01	1429	1437	yes	2	0.0092527	107.9	1	1		1	1		71312000	21622000	23999000	0	13296000	12396000	0
IFQWQSLK	8	0	1048.57	F6REX3	F6REX3	172	179	yes	2	0.012954	130.77	1	1	1	1	1	1	526080000	75994000	118720000	97338000	79328000	130050000	24657000
IFYNQQNHYDGSTGK	15	0	1770.8	F7DZE7;A0A3B0IP77	F7DZE7	130	144	yes	2;3	5.4495e-06	98.582	1	1	2	2	2	2	1086900000	141390000	268540000	187480000	161750000	279090000	48612000
IGDNMR	6	0	704.328	F6RZ27	F6RZ27	124	129	yes	2	0.031106	126.07	1	1		1	1	1	572010000	189510000	118040000	110630000	153380000	447500	0
IGDTWR	6	0	746.371	F7CN05;F7CN11;F7CS60	F7CN05	149	154	yes	2	0.028681	136.44	1			1	1	1	285600000	105580000	79911000	88136000	11974000	0	0
IGESIELTCPK	11	0	1245.63	F6YQL3	F6YQL3	724	734	yes	2	0.0024391	114.86	1	1	1	1	1	1	185840000	45037000	39967000	33617000	36202000	24567000	6449600
IGFSATR	7	0	750.402	F7BUV8	F7BUV8	121	127	yes	2	5.2756e-05	164.1	1	1	1	1	1	1	513950000	99376000	123740000	104540000	83302000	82674000	20319000
IGLHWTR	7	0	881.487	F7CAB8	F7CAB8	235	241	yes	2	0.04859	97.473		1	1			1	22851000	0	0	12151000	0	9293100	1407000
IGNFSTDIK	9	0	993.513	F6WA57;K9KEC7	F6WA57	287	295	yes	2	0.041144	86.205	1	1		1	1	1	93470000	31021000	22412000	16022000	13630000	10385000	0
IHEVTQR	7	0	881.472	F6YCW8;F6YE73	F6YCW8	2401	2407	yes	2	0.06331	92.822		1		1	1	1	485870000	125920000	125680000	147140000	0	87127000	0
IHIGSSYEK	9	0	1032.52	F6PSH3	F6PSH3	147	155	yes	2	0.013671	102.51	1	1		1	1	1	131660000	25667000	51158000	14747000	32451000	7637000	0
IHSDIAEEK	9	0	1040.51	F7BI02	F7BI02	61	69	yes	2	0.044604	84.615	1	1		1	1	1	33178000	4867500	8499600	6268100	4838800	8703900	0
IIAPPER	7	0	794.465	F6T3Y8;F7A5E3;K9KF76;F7AHF3;F7AAK7;F7CZ92;F7CW82;F6R1X9;F6Z8K0;K9K3B5;K7THJ6;P60708	F7CZ92	331	337	no	2	0.036523	110.61	1	1		1	1	1	220260000	29318000	127480000	20682000	28008000	14781000	0
IIGGLLDAK	9	0	898.549	F6XWM5	F6XWM5	102	110	yes	1;2	0.00044187	143.61	9	6	5	8	8	7	23961000000	4436100000	4878000000	4315000000	4101700000	4430900000	1799600000
IIIDLFK	7	0	860.537	F7BM31	F7BM31	429	435	yes	2	0.04587	100.67	1	1		1	1	1	283540000	78994000	53525000	51953000	51480000	47592000	0
IIIPVNSR	8	0	910.56	A0A0B4J1C4	A0A0B4J1C4	63	70	yes	2	0.00041651	154.35	1	1	1	1	1	1	2500000000	738510000	642640000	365140000	294920000	282560000	176250000
IIPSPENPNEDILER	15	0	1734.88	A0A0B4J1C4	A0A0B4J1C4	45	59	yes	2;3	1.6789e-16	196.11	2	2	3	2	3	4	8339200000	1838000000	1533400000	2169000000	1340400000	1109300000	349060000
IKDCCEEK	8	1	1080.46	F7B3I5	F7B3I5	299	306	yes	2;3	1.49e-05	171.53	2	2		2	2	2	1409300000	380210000	229950000	207850000	240170000	351120000	0
IKVPVDWNR	9	1	1125.63	F6WA57;K9KEC7	F6WA57	434	442	yes	3	0.012889	95.502	1	1		1	1	1	26817000	10164000	8543200	4102300	1962700	2044600	0
ILDMIR	6	0	759.431	F6YCW8;F6YE73;F6Z5E1	F6YCW8	1271	1276	yes	2	0.00082283	160.1	1	1	1	1	1	1	198860000	64685000	30755000	31151000	34560000	28094000	9609400
ILDSTLK	7	0	788.464	F6T0P6	F6T0P6	364	370	yes	2	0.01758	124.37	2	1	1	2	1	1	5042500000	845880000	926990000	908310000	1034100000	1012500000	314650000
ILDVNDNIPVAEK	13	0	1438.77	F7BI02	F7BI02	250	262	yes	2	0.027281	56.432	1	1	1			1	16959000	0	0	6974200	4177000	3679800	2127700
ILGDMR	6	0	703.369	F6QX36	F6QX36	318	323	yes	2	0.050535	106.84	1	1		1	1	1	66918000	15112000	8066100	18357000	12069000	13314000	0
ILGPLSYSK	9	0	976.559	F6SKT2;B8K277;A2Q0Z2	F6SKT2	300	308	yes	2	0.031461	90.657	1	1	1	2	1	1	70775000	19037000	18328000	18938000	0	12032000	2440400
ILIYANNK	8	0	947.544	A0A0A1E9A3	A0A0A1E9A3	64	71	yes	2	0.0014105	137.44	1	1		1	1	1	108830000	15463000	40695000	17433000	23307000	11934000	0
ILLEYFDK	8	0	1039.56	F6YCW8;F6YE73	F6YCW8	2034	2041	yes	2	0.057096	89.296	1	1		1	1	1	79160000	17050000	17879000	15314000	16393000	12524000	0
ILLQGTPVAQMAEDAIDGER	20	0	2126.07	F7BLE3;F7BTW7;F7E454;F7CJG3	F7BTW7	979	998	no	2;3	9.2919e-60	209.73	5	5	3	5	4	4	8643900000	1967200000	1456500000	1262000000	1555600000	1342300000	1060300000
ILLSSAK	7	0	730.459	F7BAY6;Q5XLE4;P35747	F7BAY6	212	218	no	2	0.013381	128.75	5	7	4	3	5	9	83761000000	13466000000	13389000000	21575000000	15536000000	12443000000	7351700000
ILLSSAKER	9	1	1015.6	F7BAY6;Q5XLE4;P35747	F7BAY6	212	220	no	2	0.0019591	157.33	1	1	1	1	1	1	459830000	77971000	87306000	97118000	33369000	153900000	10173000
ILPTVDGSLGLK	12	0	1211.71	F7DU87;Q0PMN3	F7DU87	92	103	yes	2	0.0025077	91.584	1	1	1	1	1	1	408380000	44957000	73214000	25581000	137260000	111110000	16263000
ILQALEFHTVPFR	13	0	1569.87	F7D7M0	F7D7M0	377	389	yes	3	0.0090115	51.211	1	1		1	1	1	50683000	12698000	6972600	8904900	15223000	6883900	0
ILQIENEGAIHR	12	0	1391.75	F6XSF7	F6XSF7	936	947	yes	2;3	2.3129e-08	149.23	5	4	4	4	4	6	1638900000	297800000	359860000	296460000	325890000	260350000	98550000
ILQSTYKDPNNLVFK	15	1	1778.96	F6PUW3	F6PUW3	888	902	yes	3	0.017834	46.964	1		1	1	1	1	69938000	24848000	18389000	16458000	9081100	0	1162800
IMELQDILAK	10	0	1172.65	F6Q4N3	F6Q4N3	244	253	yes	2	8.8697e-05	135.79	1			1	1	1	52110000	11672000	17142000	10058000	13238000	0	0
IMNVFLK	7	0	863.494	F7BLE3;F7BTW7;F7E454;F7CJG3	F7BTW7	789	795	no	2	0.014432	127.66	1	1	1	1	1	1	1680900000	405900000	427160000	285490000	247110000	239120000	76160000
IMQCLPKPEDVR	12	1	1484.75	F7BNQ2	F7BNQ2	560	571	yes	2;3	0.00031462	146.11	2	2	2	2	2	2	1488700000	404740000	334950000	226970000	258880000	230350000	32805000
IMQWQNIQLENGLK	14	0	1713.89	F6QAD8;F6R6K3;F6R7S3	F6QAD8	175	188	yes	2	2.0153e-37	203.94	1	1	1	1	1	1	188350000	33794000	31830000	25722000	28653000	34271000	34078000
IMSHICSK	8	0	974.468	F7B3I5	F7B3I5	284	291	yes	2	0.0011419	143.11	1	1		1	1	1	577080000	141510000	143300000	115120000	81197000	95945000	0
INCIPDQPPTK	11	0	1281.64	F6PUW3	F6PUW3	99	109	yes	2	0.0033203	102.06	1	1	1	1	1	1	94443000	48743000	6519200	13707000	16358000	7288600	1828000
INENTGSVSVTR	12	0	1275.64	F6VN96	F6VN96	173	184	yes	2	0.0011579	140.3	1			1			24063000	15264000	0	0	8798800	0	0
INIDQFLR	8	0	1017.56	F6YCW8;F6YE73	F6YCW8	2060	2067	yes	2	1.7453e-13	194.25	1	1	1	1	1	1	99730000	11588000	19156000	13805000	25521000	16176000	13484000
INLNEK	6	0	729.402	F6YCW8;F6YE73	F6YCW8	2123	2128	yes	2	0.035301	118.06						1	64038000	0	0	64038000	0	0	0
INPDTGAISTQAELDRENLEHVK	23	1	2549.27	F6Y0D9	F6Y0D9	453	475	yes	4	0.0006783	43.198	1	1	1		1	1	59231000	0	11970000	17507000	15475000	11972000	2306900
INPLVLK	7	0	795.522	F6YCW8;F6YE73	F6YCW8	2778	2784	yes	2	0.063789	92.692	1	1	1	1	1	1	108000000	15729000	22426000	17586000	28111000	19336000	4808300
INQQLDTK	8	0	958.508	Q8MJV1;F6QLB5;F6UP52;Q8MJV0;F6R839;F6SUC3	Q8MJV0	446	453	no	2	0.033661	97.798					1		38997000	0	38997000	0	0	0	0
IPAETLNR	8	0	912.503	F6VB94;F6UMQ4	F6VB94	271	278	yes	2	0.0043227	128.86	1	1	1	1	1	1	60583000	9735800	10285000	13321000	14757000	9967400	2516700
IPEATNR	7	0	799.419	F7CYR1;Q9N1X2	F7CYR1	73	79	yes	2	7.5331e-05	160.69	1	1	1	1	1	1	5785000000	1092600000	905630000	983720000	1061300000	893300000	848390000
IPPAMDTWLYLGYEYVTAIR	20	0	2371.19	F6ZEH8;Q9TQV8;P27425	P27425	326	345	no	3	1.8474e-12	113.47	1	1	1		2		100220000	0	58308000	0	15601000	11416000	14893000
IPQIER	6	0	754.434	F6ZR63;F7E3H8	F6ZR63	571	576	no	2	0.021075	142.63	1	1		1	1	1	2702600000	748930000	597320000	407260000	584720000	364420000	0
IPQLFVEINPDTK	13	0	1512.82	F6SUS2	F6SUS2	150	162	yes	2	3.7792e-20	196.88	1	1		1	1	1	199470000	37235000	21954000	38441000	53682000	48158000	0
IPQPLFFINSER	12	0	1459.78	F6PJI3	F6PJI3	311	322	yes	2	0.00068946	146.11	1	1	1	1	1		118640000	23489000	36411000	0	33936000	16052000	8753000
IPVVTQGSNVQSLTQDDGVAK	21	0	2155.11	F7BLE3;F7BTW7;F7E454;F7CJG3	F7BTW7	386	406	no	2;3	4.9497e-57	250.31	2	2	2	3	3	2	5642100000	1187300000	1374800000	1071900000	1045600000	659930000	302490000
IQALMAAASLGQTK	14	0	1401.77	F6PJI3	F6PJI3	42	55	yes	2	0.055796	48.004					1		6537300	0	6537300	0	0	0	0
IQCATGYEQSEHNVCQDIDECTAGTHNCR	29	0	3452.39	F6T0M8;F6PVG3	F6T0M8	154	182	yes	4	1.8754e-07	61.732	1	1	1	1	1	1	295140000	40219000	70964000	36066000	59142000	61501000	27244000
IQDILSEEPK	10	0	1170.61	F7DTV1	F7DTV1	307	316	yes	2	4.1137e-06	154.56	1	1	1	1	1	1	1632100000	310510000	424100000	202780000	372740000	211510000	110510000
IQEEGTEVELTGR	13	0	1459.72	F6RI47;F6R942	F6RI47	326	338	yes	2;3	6.1783e-47	211.78	21	18	17	20	20	22	31148000000	6869100000	7132400000	6080100000	5465500000	4111500000	1489100000
IQHQDWLNGK	10	0	1237.62	H9GZS9	H9GZS9	213	222	yes	2;3	1.2758e-30	203.64	2	3	2		1	4	626700000	0	0	60574000	0	503020000	63106000
IQHQDWLSGK	10	0	1210.61	Q95M34;H9GZQ9	Q95M34	196	205	yes	2;3	0.00079046	145.46	5	5	3	4	3	5	45051000000	8848900000	8081600000	9990400000	9334600000	6200400000	2595500000
IQLALGDQMLK	11	0	1228.68	F6SIE2	F6SIE2	256	266	yes	2	0.0027207	87.913					1	1	9941400	0	0	9941400	0	0	0
IQPSGGTNINEALLR	15	0	1581.85	F7DL17;F7CTJ3;F7DAF6	F7DL17	380	394	yes	2;3	9.8996e-08	158.05	2	2	2	2	2	3	3201000000	748930000	718330000	539040000	575170000	469740000	149760000
IQPTLLMIPR	10	0	1180.7	F7CZW9	F7CZW9	367	376	yes	2	0.00033629	140.09	1	1	1	1	1	1	1725000000	443600000	377370000	246160000	252660000	259620000	145630000
IQSSHNFQMESVNK	14	0	1647.77	F7ATS5	F7ATS5	84	97	yes	2;3	0.0016024	63.408	1	2	1	2	2	2	175740000	39681000	55205000	36767000	17194000	22112000	4779500
IQTHSATYR	9	0	1075.54	F7C7J6	F7C7J6	285	293	yes	3	0.017147	57.032	1		1	1	1		87358000	39083000	19666000	0	20535000	0	8073600
IQYYCHEPYYK	11	0	1562.69	F6Z5L1	F6Z5L1	402	412	yes	2	0.049028	60.019	1	1		1	1	1	50978000	20831000	11611000	5767700	9016200	3752400	0
ISANADELR	9	0	987.499	F6RZ27	F6RZ27	256	264	yes	2	1.9915e-30	215.1	1	1	1	1	1	1	1032000000	206980000	225390000	120910000	300320000	140220000	38203000
ISCTIANR	8	0	933.47	F7CN05;F7CN11;F7CS60	F7CN05	132	139	yes	2	1.6583e-08	179.16	1	1	1	1	1	1	1504500000	434290000	347650000	528020000	59654000	110680000	24170000
ISDANLR	7	0	787.419	F6W4R2	F6W4R2	416	422	yes	2	0.0093497	132.96	1	1	1	1	1	1	297510000	45802000	51363000	3091500	91172000	77599000	28482000
ISENGHDIALIK	12	0	1308.7	F6PR90	F6PR90	477	488	yes	3	0.037604	39.581	1	1	1	1	1	1	82703000	16399000	20466000	11114000	13674000	16399000	4650900
ISEVKEEQEDPYLNDR	16	1	1962.92	F7ABC9	F7ABC9	145	160	yes	3	0.00096957	85.734					1		0	0	0	0	0	0	0
ISFDEFIK	8	0	997.512	F6WA57;K9KEC7	F6WA57	70	77	yes	2	0.032482	98.997	1	1		1		1	34553000	12102000	0	8639500	7195700	6615200	0
ISHTQEDCLSFK	12	0	1463.67	F7BTW7;F7E454;F7CJG3	F7BTW7	1452	1463	yes	2;3	5.3451e-94	268.58	3	4	1	3	3	4	9089200000	1997300000	2116100000	1972400000	1572700000	1203300000	227290000
ISLAQSLTR	9	0	987.571	F7BLE3;F7BTW7;F7E454;F7CJG3	F7BTW7	281	289	no	1;2	1.8606e-53	241.01	2	2	2	3	3	2	5783100000	1589400000	1207400000	905810000	1105300000	704570000	270630000
ISNIPDEYFK	10	0	1224.6	F6SKT2;B8K277;A2Q0Z2	F6SKT2	220	229	yes	2	0.0040487	101.9	1		1	1	1	1	206550000	48423000	46557000	53649000	48646000	0	9276000
ISSELYDNANDLLSK	15	0	1680.82	F7CFN5	F7CFN5	187	201	yes	2	2.918e-05	134.13	1	1	1	1	1	1	577970000	97200000	93844000	123240000	103810000	106240000	53631000
ISVTRPLK	8	1	912.576	F6RMD0	F6RMD0	499	506	yes	2	0.00021959	169.06	1	2		1	1	1	626120000	172440000	193310000	99717000	107140000	53518000	0
ITAIVTQGCK	10	0	1089.59	F7DZ01	F7DZ01	1385	1394	yes	2	0.00023265	118.5	1	1	1	1	1	1	49077000	14173000	10903000	11777000	0	9168500	3055900
ITCTSR	6	0	736.354	F7CN05;F7CN11;F7CS60	F7CN05	222	227	yes	2	0.0070394	154.29		1		1	1	1	1447200000	377800000	334560000	628380000	0	106490000	0
ITENDIQIALDK	12	0	1371.72	F6YCW8;F6YE73	F6YCW8	2109	2120	yes	2	5.0478e-12	164.64	1	1	1	1	1	1	383730000	68674000	100830000	60199000	64367000	66084000	23576000
ITGYIIK	7	0	806.49	F7CN05;F7CN11;F7CS60;Q28377	F7CN05	1839	1845	yes	2	0.057475	94.401	1			1	1		222480000	110930000	101090000	0	10456000	0	0
ITHYNYLILSK	11	0	1363.75	F7D7B5	F7D7B5	468	478	yes	3	0.0028809	75.416	1	1	1	1	1	2	57243000	15603000	17352000	6187500	7281400	8844300	1974200
ITIMWTPPESAVTGYR	16	0	1820.91	F7CN05;F7CN11;F7CS60	F7CN05	922	937	yes	2	2.4936e-44	208.74		1	1	1	1	1	170570000	50513000	47466000	42797000	0	10629000	19165000
ITKCCTDSLAER	12	1	1452.67	F7BAY6;Q5XLE4;P35747	F7BAY6	496	507	no	2	0.05275	106.29	1	1				1	41513000	0	0	9497500	17089000	14927000	0
ITQLLPR	7	0	839.523	F6YCW8;F6YE73;F6Z5E1	F6YCW8	536	542	yes	2	0.013381	128.75	1	1	1	1	1	1	275100000	38168000	55225000	46436000	84747000	40421000	10100000
ITQVLHFTK	9	0	1085.62	F6XSF7	F6XSF7	1653	1661	yes	2;3	0.023757	91.087	1	2		2	3	2	259580000	33681000	43329000	44819000	122370000	15390000	0
ITYGETGGNSPVQEFTVPGSK	21	0	2167.04	F7CN05;F7CN11;F7CS60	F7CN05	1479	1499	yes	2;3	4.0289e-08	108.36	2	2	2	2	2	2	853140000	246270000	285500000	216270000	33841000	43726000	27532000
ITYSCFK	7	0	917.432	F7BNQ2	F7BNQ2	403	409	yes	1	5.6864e-08	180	1	1		1	1	1	238710000	62675000	55675000	64635000	29083000	26647000	0
IVDDLGPK	8	0	855.47	F6R3F4	F6R3F4	299	306	yes	2	0.0026892	132.09	1	1	1	1	1	1	1912600000	420050000	467020000	283990000	454420000	228390000	58718000
IVEGQPNLK	9	0	996.56	F6W1N4;F6W2K5	F6W1N4	459	467	yes	2	0.013506	102.71	1			1	1		22622000	11111000	0	0	11511000	0	0
IVETALTPDSCYPD	14	0	1579.71	A0A0B4J1C4	A0A0B4J1C4	145	158	yes	2	0.00197	74.464	1	1	1	1	1	1	1713300000	413720000	429720000	293330000	257800000	240380000	78381000
IVGVTLVNR	9	0	969.597	F6S568	F6S568	38	46	yes	2	0.00062057	119.17	1	1		1		1	26027000	7910300	0	0	12227000	5889400	0
IVHLVGGLCK	10	0	1094.63	F6ZLR1	F6ZLR1	195	204	yes	2;3	0.0054604	103.91	2	3		1	1	2	205230000	32449000	31896000	39528000	27634000	73722000	0
IVHTCPDCPGPIK	13	0	1492.72	F6RRV1	F6RRV1	144	156	yes	2;3	1.3639e-28	192.26	2	1	1	2	2	2	3353100000	819310000	1417100000	412700000	644070000	19172000	40787000
IVIKEPCCCPK	11	1	1402.68	H9GZU8	H9GZU8	98	108	yes	2;3	0.001993	124.23	2	1	1	2	2	3	649080000	135000000	292860000	38971000	113080000	37079000	32094000
IVIVTVLETIQK	12	0	1354.84	F6YCW8;F6YE73	F6YCW8	2044	2055	yes	2	0.00086955	126.55	1	1	1	1	1	1	55528000	8354200	6270200	8325400	18511000	4395300	9672800
IVLADNK	7	0	771.449	A0A0B4J1C4	A0A0B4J1C4	29	35	yes	2	0.0047713	141.98	1	1	1		1	1	1568500000	0	523590000	433650000	294080000	235840000	81357000
IVMSVLHHNSR	11	0	1291.68	F6PPQ0	F6PPQ0	298	308	yes	2;3	0.00051255	105.46				1	1		22934000	4874900	18059000	0	0	0	0
IVQFSPTGR	9	0	1003.55	F7BQX4;F7BR00;F6ZCC8;Q28390	F7BQX4	654	662	yes	2	0.031461	90.657		1		1			14374000	7470200	0	0	0	6904000	0
IVSVSCK	7	0	791.421	F6RRV1	F6RRV1	244	250	yes	2	0.042944	104.11	1	1	1	1	1		1279700000	332480000	553990000	0	231710000	138490000	23004000
IVTDLTK	7	0	788.464	F7BAY6;Q5XLE4;P35747	F7BAY6	257	263	no	2	0.0061086	138.85	6	7	5	6	7	7	61865000000	12001000000	9350400000	13018000000	9075000000	13202000000	5218700000
IVTDLTKVHK	10	1	1152.69	F7BAY6;Q5XLE4;P35747	F7BAY6	257	266	no	3	0.0014715	107.79	1	1		1	1	1	179150000	24284000	19371000	29440000	33750000	72303000	0
IYAIWEHNIK	10	0	1285.68	F6YCW8;F6YE73;G5CW75	F6YCW8	3515	3524	yes	2;3	0.02622	73.26	1	1	1	1	2	1	103930000	15849000	25483000	16828000	21185000	17854000	6731800
IYDPNNNR	8	0	1004.47	F6PUW3	F6PUW3	1056	1063	yes	2	0.04153	94.407			1		1		57777000	0	49827000	0	0	0	7949400
IYEDSDSALQLQDFYQEVANPLLMK	25	0	2929.41	F6R3F4	F6R3F4	439	463	yes	2;3	2.6685e-45	159.18	3	3	3	4	2	4	1007800000	214300000	182210000	209630000	154820000	167050000	79791000
IYGNQDTSSQLK	12	0	1352.66	F7DL17;F7CTJ3;F7DAF6	F7DL17	476	487	yes	2	5.5829e-08	154.85	1	1	1	1	1	1	2166000000	518480000	533660000	371160000	434340000	234090000	74316000
IYGNQDTSSQLKK	13	1	1480.75	F7DL17;F7CTJ3;F7DAF6	F7DL17	476	488	yes	3	0.0004277	117.79	1	1		1	1	1	245280000	44346000	101530000	41551000	20468000	37385000	0
IYHSHIDAPK	10	0	1179.6	F6PQ46	F6PQ46	177	186	yes	2;3	0.00028156	131.5	2	2		2	2	2	6778100000	1473900000	991370000	1741700000	1333500000	1237600000	0
IYLSECK	7	0	911.442	F6USP9	F6USP9	104	110	yes	2	0.015788	126.24	1	1	1	1	1	1	1475200000	320140000	226120000	351950000	199480000	304470000	73041000
IYLYTLNDNAR	11	0	1354.69	F7CN05;F7CN11;F7CS60;Q28377	F7CN05	1790	1800	yes	2	2.7582e-72	251.3	1	1	1	1	1	1	630590000	193740000	200720000	165680000	20304000	27197000	22949000
IYNILDMK	8	0	1008.53	F6XSF7	F6XSF7	1389	1396	yes	2	0.0069359	123.69	1	1	1	1	1	1	639320000	160320000	146240000	83499000	105820000	104350000	39091000
IYPTVNCQPR	10	0	1246.61	F7C0D9;F7C0Z0	F7C0D9	366	375	yes	2	6.7772e-06	151.29	1	1	1	1	1	1	1665500000	344700000	403290000	263090000	343890000	274040000	36460000
IYWESASLLR	10	0	1236.65	F7BTW7;F7E454;F7CJG3	F7BTW7	1312	1321	yes	2	3.8258e-34	214.25	1	1	1	1		1	2066200000	529970000	0	426820000	354620000	513280000	241520000
KAAISGENAGLVR	13	1	1284.71	F6QX36	F6QX36	125	137	yes	2;3	0.00038538	93.766	2	1		2	2	1	62159000	11963000	16484000	10888000	10423000	12401000	0
KAEEEHLGVLGPQLHADVGDK	21	1	2241.14	F6PQ46	F6PQ46	799	819	yes	2;3;4;5	3.0112e-29	137.95	7	4	4	6	5	5	2820600000	684550000	404320000	523540000	803680000	379020000	25455000
KAEGISEFYDYDVALIK	17	1	1959.98	F6RMD0;K9KBR1	F6RMD0	565	581	yes	2;3	4.4497e-28	210.37	2	2	2	2	3	2	1217100000	305740000	200970000	188680000	176960000	196770000	148000000
KAEPLGPWSQVEGMEDWEK	19	1	2215.03	F7CAB8	F7CAB8	67	85	yes	3	2.3095e-05	94.057	1	1	1		1	1	109980000	0	11058000	13252000	32897000	27720000	25052000
KAPDAGGCVHADPDLGVLCPTGCQLQDTLVK	31	1	3291.57	F6PH38	F6PH38	87	117	yes	4	4.2981e-11	79.731	1			1		1	98728000	55196000	0	22073000	21459000	0	0
KAPQVSTPTLVEIGR	15	1	1594.9	F7BAY6;Q5XLE4;P35747	F7BAY6	437	451	no	2;3;4	1.9511e-43	201.3	22	21	17	18	20	21	152520000000	25095000000	25091000000	34443000000	35947000000	19042000000	12900000000
KAPTPEQTHR	10	1	1163.6	F6X449	F6X449	72	81	yes	2;3	1.2039e-07	165.26	2	2	2	2	2	2	3026200000	484290000	432660000	583740000	685460000	690860000	149170000
KASDFQLNQLQGK	13	1	1475.77	F6PKE1	F6PKE1	108	120	yes	2;3	2.4983e-36	214.67	2	2	2	2	2	2	509450000	106400000	148680000	103660000	81760000	58143000	10803000
KATEDEGSEQK	11	1	1220.55	F7CYR1;Q9N1X2	F7CYR1	62	72	yes	2;3	2.7219e-07	158.79	2	2		1	1	1	285950000	71165000	5291600	3018500	205860000	622440	0
KATEDEGSEQKIPEATNR	18	2	2001.96	F7CYR1;Q9N1X2	F7CYR1	62	79	yes	2;3;4	4.0577e-09	154.69	3	3	2	3	3	2	970580000	235430000	318870000	71355000	134930000	191730000	18266000
KATTVTGTR	9	1	933.524	F6USP9;P80010	F6USP9	500	508	yes	2	0.00061462	152.63	1	1	1	1	1	1	3624000000	731250000	762980000	662590000	820020000	542290000	104860000
KATVIYQGER	10	1	1163.63	F6Z041	F6Z041	270	279	yes	2;3	1.7025e-23	168.25	2	3	2	2	2	3	5992500000	1952900000	1872100000	253770000	1490600000	258960000	164290000
KATVQVVAGR	10	1	1027.61	F7C0D9;F7C0Z0	F7C0D9	308	317	yes	2	0.038978	56.729				1			0	0	0	0	0	0	0
KCAADESAENCDK	13	1	1496.59	F7BAY6;Q5XLE4;P35747	F7BAY6	76	88	no	2;3	2.4036e-101	260.22	2	1	3	2	2	2	79817000000	15382000000	16911000000	22753000000	211780000	13043000000	11517000000
KCCEDGMR	8	1	1054.4	F7BTW7;F7E454;F7CJG3	F7BTW7	691	698	yes	2	0.00014996	159.2	1	1		1	1	1	359680000	67640000	69796000	87690000	70480000	64074000	0
KDDEEFIESNK	11	1	1352.61	F6PQ46	F6PQ46	947	957	yes	2;3	4.597e-103	272.94	4	3	1	2	2	3	2561600000	944260000	690590000	138860000	561950000	183330000	42650000
KDFTYNPVDFK	11	1	1372.67	F6PUW3	F6PUW3	421	431	yes	3	0.0022546	73.951			1	1	1	1	22365000	8465500	6897600	5610500	0	0	1391500
KDGEQHVFK	9	1	1086.55	F6RMD0	F6RMD0	446	454	yes	2;3	0.0003287	155.95	2	2	1	2	2	2	3615000000	928950000	690270000	777480000	889350000	328360000	629020
KDLPSDLLLLK	11	1	1253.76	F7DZ01	F7DZ01	252	262	yes	3	0.00041036	111.63	1		1	1		1	23102000	15697000	0	3821100	0	0	3584000
KDLYANNVMSGGTTMYPGIADR	22	1	2373.11	F7CZ92;K7THJ6	F7CZ92	293	314	yes	3	0.00023675	60.278					1		37698000	0	37698000	0	0	0	0
KDQCGPLEK	9	1	1073.52	F7AED2	F7AED2	180	188	yes	2	0.04875	101.54	1	1	1	1		1	3505800000	1133300000	0	991040000	849440000	423090000	108900000
KDTIIKPLLVEPEGLEK	17	2	1921.11	F6RI47;F6R942	F6RI47	900	916	yes	2;3;4	3.035e-15	118.96	4	4	3	8	7	3	1693300000	379300000	583520000	186050000	196580000	272600000	75247000
KEDDLANINQWVK	13	1	1571.79	F6X449	F6X449	197	209	yes	2;3	1.6273e-14	154.15	2	2	2	2	2	2	730540000	125780000	169280000	121260000	175020000	110050000	29162000
KEDSCQLDHAEGPCLGMISR	20	1	2302.01	F6UZH0	F6UZH0	227	246	yes	3;4	5.3678e-36	178.1	2	2	2	2	2	2	825100000	200640000	219270000	118940000	147030000	89502000	49723000
KEGIPDAR	8	1	884.472	F7BLE3;F7BTW7;F7E454;F7CJG3	F7BTW7	426	433	no	2	0.039408	114.64		1		1	1	1	249180000	88963000	83508000	39825000	0	36888000	0
KEIHHHVEQLK	11	1	1396.76	F7A103;F6RHE9	F7A103	3790	3800	yes	4	0.058931	26.707	1	1		1	1	1	53714000	6223100	4134600	7981000	20717000	14658000	0
KELSSFIGK	9	1	1007.57	F6T0P6	F6T0P6	394	402	yes	2	0.0010273	137.69	1	1		1	1	1	372300000	45386000	96222000	54500000	93003000	83192000	0
KEQQDSPDEK	10	1	1202.54	F6X449	F6X449	445	454	yes	2	1.3614e-11	179.42	1	1	1	1	1	2	86217000	11421000	11879000	23125000	9549200	11487000	18755000
KEQQDSPDEKDFFQSLK	17	2	2067.97	F6X449	F6X449	445	461	yes	2;3	0.015059	52.344	1	1	1		1	1	119210000	0	6506700	39999000	30099000	34879000	7725400
KESLVFVQTDKPIYK	15	2	1793.99	F6RI47;F6R942	F6RI47	125	139	yes	3	0.00044175	76.82				1	1		48753000	23038000	25715000	0	0	0	0
KFQVDNK	7	1	877.466	F6RI47;F6R942	F6RI47	1292	1298	yes	2	0.0017519	156.4	1	1	1	1	1	1	9551100000	2253800000	2700000000	1526900000	1685300000	735320000	649670000
KGDFYHYR	8	1	1084.51	F7A692	F7A692	24	31	yes	3	0.022452	83.206	1			1	1		132810000	47303000	41095000	0	44415000	0	0
KGNEAVASR	9	1	930.488	F7ATS5	F7ATS5	183	191	yes	2	0.062963	59.35						1	0	0	0	0	0	0	0
KGNVATEISIER	12	1	1315.71	F6YCW8;F6YE73;F6Z5E1	F6YCW8	155	166	yes	2;3	7.4261e-16	209.97	1	2	1	3	3	2	123010000	35415000	46225000	7605700	12305000	20196000	1266900
KGYTQQLAYR	10	1	1226.64	F7BTW7;F7E454;F7CJG3	F7BTW7	1050	1059	yes	2;3	1.6119e-57	278.65	2	2	2	2	2	2	1219500000	142140000	225920000	435180000	148530000	232620000	35113000
KHGEDCEPAVSR	12	1	1383.62	F6ZI35	F6ZI35	82	93	yes	2;3	2.5894e-40	220.1	2	2	2	2	2	2	8215900000	1781700000	1115800000	1916800000	2146100000	1191700000	63747000
KHYLQVFNPIK	11	1	1385.78	F6PQ46	F6PQ46	902	912	yes	3	0.0015189	101.97				1	1		38566000	18010000	20556000	0	0	0	0
KIEHSFEVIEYVLPK	15	1	1829.99	F6REX3	F6REX3	211	225	yes	3;4	5.4224e-06	108.06	1	2		1	1	1	100270000	19903000	18860000	22035000	2154700	37313000	0
KIMQCLPKPEDVR	13	2	1612.84	F7BNQ2	F7BNQ2	559	571	yes	4	0.013603	39.424	1			1	1	1	47213000	16404000	18012000	3354900	9442300	0	0
KIVHTCPDCPGPIK	14	1	1620.81	F6RRV1	F6RRV1	143	156	yes	3	0.00076972	66.285	1	1		1	1	1	151490000	25503000	45568000	38987000	28096000	13331000	0
KIWDTVEK	8	1	1017.55	F7BLE3;F7BTW7;F7E454;F7CJG3	F7BTW7	613	620	no	2	0.00020768	158.87	3	2	2	2	2	2	1592800000	241240000	401410000	298360000	304320000	271340000	76151000
KIYPTVNCQPR	11	1	1374.71	F7C0D9;F7C0Z0	F7C0D9	365	375	yes	2;3	0.0011128	151.44	3	2	2	3	2	3	791040000	221920000	181830000	151030000	104900000	112800000	18547000
KLCMAALK	8	1	933.514	F6T0P6	F6T0P6	120	127	yes	2	0.0018867	149.48	1			3	1	1	671660000	194770000	271770000	94561000	110570000	0	0
KLENCNYAVELGK	13	1	1536.76	F6WA57;K9KEC7;F7AGA5	F6WA57	457	469	yes	2;3	0.013433	79.659	1	2	2	1	1	1	91608000	30461000	19701000	9167900	14146000	14198000	3935200
KLGSYEHR	8	1	988.509	F7DL17;F7CTJ3;F7DAF6	F7DL17	190	197	yes	2	0.0023029	147.16	1	1		1	1	1	414840000	58969000	105950000	89972000	109840000	50109000	0
KLISVDTEHSDIYLQNGPDR	20	1	2299.14	F6PQ46	F6PQ46	42	61	yes	2;3;4	1.536e-07	100.02	2	2	2	3	3	1	637430000	213910000	202420000	35903000	105040000	69964000	10191000
KLSPSECS	8	1	906.412	F6SP11	F6SP11	99	106	yes	2	0.056545	108.46	1	2	1	2	2	2	6529800000	1729000000	1502500000	1288800000	814240000	1194300000	824240
KLTQYDLVIK	10	1	1219.72	F6QX36	F6QX36	171	180	yes	2;3	3.6854e-06	157.75	2	3		2	2	3	1846700000	546960000	638540000	234350000	275790000	151050000	0
KMDAHPPR	8	1	950.476	Q28372;F7DHZ1;F7E2D1;Q6X9X6	Q28372	610	617	yes	2	0.0003277	158.2	1	1		1	1	1	139930000	20177000	39570000	24582000	28520000	27082000	0
KNACNGVNDCGDQSDELCCK	20	1	2342.9	F7APU2;F7AU56	F7APU2	214	233	yes	3	6.486e-05	89.374	1	1		1	1	1	137200000	36162000	29070000	23064000	26781000	22121000	0
KNCDLFEEVGEYDFQNALIVR	21	1	2558.21	F7BAY6;Q5XLE4;P35747	F7BAY6	413	433	no	2;3;4	4.3874e-100	261.35	9	11	4	10	9	11	1327500000	298480000	267870000	251510000	211650000	192520000	105510000
KNEFQGELEK	10	1	1220.6	F7ATS5	F7ATS5	67	76	yes	2;3	9.8371e-06	170.99	2	1		2	2	2	212930000	76599000	53674000	31801000	42104000	8752900	0
KNFDNDIALVR	11	1	1303.69	F7BQD6	F7BQD6	530	540	yes	2;3	3.2201e-12	176.38	2	2	1	2	2	2	186480000	47313000	31301000	38850000	28400000	30536000	10078000
KNIMAGLQQTNSEK	14	1	1560.79	F6UEI7	F6UEI7	2	15	yes	2	0.0016325	58.699					1		8321900	0	8321900	0	0	0	0
KNQGIPEFYGDDIALVK	17	1	1905.98	F6PPQ0	F6PPQ0	544	560	yes	2;3	4.8682e-15	151.99	2	2	1	2	2	2	330920000	92578000	52635000	39100000	52883000	69988000	23736000
KNSNFQLNQLQGK	13	1	1517.8	F6ZEH8;Q9TQV1;P27425	P27425	119	131	no	2;3	1.4347e-58	225.22	5	8	4	5	4	8	4975200000	1242700000	1267000000	240670000	1884600000	211650000	128580000
KNVPIDGK	8	1	869.497	F7AXF6	F7AXF6	542	549	yes	2	0.059345	107.29	1			1		1	58616000	14137000	0	23732000	20746000	0	0
KPEVTCVVVDLGHDDPDVQFTWFVDGVETHTATTEPK	37	1	4167.97	H9GZU9	H9GZU9	133	169	yes	3;4;5	1.5369e-103	202.52	3	2	2	6	3	3	2025300000	233900000	678520000	626950000	162130000	192340000	131470000
KPGIFELGISSASGNAK	17	1	1674.89	F7AXF6	F7AXF6	262	278	yes	3	4.4559e-09	84.403	2	1	2	2	2	1	117210000	32425000	34050000	14122000	23246000	9282900	4090100
KPGSSGTLSASIWTSGSSGPGSASTR	26	1	2422.17	O97641	O97641	258	283	no	3	0.00062101	44.3				1			5255700	5255700	0	0	0	0	0
KPLNTEDVTK	10	1	1143.61	F6UZI2	F6UZI2	512	521	yes	2	0.0020739	125.75	1	1	1	1	1	1	95942000	18630000	28339000	10813000	23035000	11559000	3564800
KPLSASSIEECEAK	14	1	1547.75	F6USP9	F6USP9	45	58	yes	2;3	1.6781e-72	241.51	2	2	2	2	2	2	5463300000	1226800000	1389400000	962280000	766300000	855010000	263540000
KPWNLASLAYETK	13	1	1519.8	P48770;F6UFT2	P48770	195	207	yes	2;3	2.3484e-72	244	1	1		2	1	2	171780000	55673000	0	44093000	30818000	41200000	0
KPYNVESYSPQTQGK	15	1	1724.84	F7AXF6	F7AXF6	214	228	yes	2;3	3.3093e-12	127.03	2	2	1		1	2	151940000	0	29982000	50387000	31687000	38610000	1279000
KQDGSYGAWLHR	12	1	1416.69	F6XSF7	F6XSF7	1067	1078	yes	3;4	3.2408e-12	138.75	3	3	1	2	2	3	1397800000	357310000	333040000	290470000	252470000	151760000	12793000
KQINDYVEK	9	1	1135.59	B5BV04;B5BV07;B5BV11;B5BV10;B5BV06;B5BV09;B5BV08;F7BF31;F7DXM5	B5BV07	182	190	no	2;3	6.437e-06	168.83	2	2	2	2	2	2	1685200000	331160000	233230000	583440000	226050000	262810000	48473000
KQNNEILLFK	10	1	1245.71	F6PZG1	F6PZG1	75	84	yes	2;3	1.0447e-07	166.16	1	2		1	2	2	250350000	96485000	56125000	61551000	5803400	30384000	0
KQPVEIEK	8	1	969.549	F6XWM5	F6XWM5	168	175	yes	2	0.011462	128.12	1	1	1	1	1	1	36915000000	9469300000	8889100000	7225700000	4605600000	6721400000	3673500
KQSALAELVK	10	1	1085.64	F7BAY6;Q5XLE4;P35747	F7BAY6	548	557	no	2;3	1.9251e-07	180.67	8	8	6	7	7	8	46087000000	6874400000	7676800000	9691300000	7087600000	11336000000	3420900000
KQVLSSEK	8	1	917.518	F7BLE3;F7BTW7;F7E454;F7CJG3	F7BTW7	66	73	no	2	9.3292e-13	190.73	1	1	1	1	1	1	1559300000	338780000	372580000	287160000	274970000	226740000	59084000
KSCHTGLGR	9	1	1014.5	F6PKE1;F6ZEH8;Q9TQV1;P27425	P27425	132	140	no	2	0.0015178	132.76	1	1		1		1	117920000	71760000	0	5781000	26411000	13971000	0
KSDVGFLPPLPTLDLEEK	18	1	1997.07	F7B3I5	F7B3I5	130	147	yes	2;3	3.5236e-12	186.05	2	2	1	2	2	2	500710000	126970000	71834000	88363000	98389000	83354000	31791000
KSLLGTLEEAK	11	1	1187.68	Q29482	Q29482	67	77	yes	2;3	0.003559	108.9		1		2		1	55193000	25381000	0	16269000	0	13543000	0
KSLLGTLEEAKK	12	2	1315.77	Q29482	Q29482	67	78	yes	3	0.01657	68.171				1	1		24177000	11896000	12282000	0	0	0	0
KSPEQQDTVLNGNFIVR	17	1	1944.01	F6R3F4	F6R3F4	223	239	yes	3	1.8662e-05	84.508			1		1	1	34752000	0	19095000	9222800	0	0	6434500
KSPQELLCGASLISDR	16	1	1772.91	F7BFJ1	F7BFJ1	385	400	yes	3	1.162e-112	205.66	1	1	1	1	1	1	929170000	157810000	320160000	132980000	123190000	134230000	60803000
KSSPVMR	7	1	803.432	F6USP9	F6USP9	87	93	yes	2	0.022608	104.11	1						0	0	0	0	0	0	0
KSVDEYKDCYLASIPSHAVVAR	22	2	2507.25	F6ZEH8;Q9TQV8;P27425	P27425	254	275	no	3;4;5	2.7869e-06	93.804	4	3	3	4	4	3	2223400000	611290000	608000000	409830000	246540000	292890000	54853000
KTDELPQLVTLPHPNLHGPEILDVPSTVQK	30	1	3314.79	F7CN05;F7CN11;F7CS60	F7CN05	1899	1928	yes	4;5	4.2518e-17	106.66	1	1		2	2	2	241380000	75947000	63305000	89728000	4432300	7969900	0
KTNIQGVNLR	10	1	1141.66	F6XSF7	F6XSF7	130	139	yes	2;3	3.5862e-06	157.8	2	1		2	2	1	615430000	216520000	106140000	45640000	201320000	45820000	0
KTSLQDFHLDEER	13	1	1616.78	F7BKE1;B8K250	F7BKE1	225	237	yes	3;4	0.0013038	77.527	2	2	2	2	2	2	233530000	52773000	48264000	48837000	36519000	44447000	2688600
KVEILHPGR	9	1	1047.62	F6YQL3	F6YQL3	923	931	yes	3	0.0087342	96.331	1	1			1	1	114820000	0	6872400	39646000	5796800	62503000	0
KVENALIR	8	1	941.566	F6Z352	F6Z352	407	414	yes	2	0.062915	105.81	1			1	1		139560000	44143000	55067000	0	40351000	0	0
KVGDALTLAVGHLDDLPGALSNLSDLHAHK	30	1	3076.63	P01959;P01958	P01959	62	91	yes	5	1.3161e-12	85.745	1	2			2	2	57381000	0	13076000	23989000	5306300	15009000	0
KVGSQYR	7	1	836.45	F6RMD0	F6RMD0	176	182	yes	2	0.00018385	160.69	1	1		1	1	1	1402900000	256150000	228430000	324750000	255940000	337640000	0
KVIEQVQHINLLQK	14	1	1688.99	F6RUZ6	F6RUZ6	145	158	yes	3	0.036119	43.813	1			1	1	1	32845000	17283000	4036100	3836300	7689300	0	0
KVLHSFGEGVHHLDNLK	17	1	1929.02	P02062;D1MPT0;F6RDD3;F6VE37;A0A1K0GV35	P02062	66	82	yes	5	0.058389	19.715						1	8648500	0	0	8648500	0	0	0
KVTAEDLK	8	1	902.507	F7ASE1;F7AWQ9	F7ASE1	324	331	yes	2	0.040122	114.39	1			1		1	95261000	46209000	0	25511000	23541000	0	0
KVTEENKELANELR	14	2	1671.88	F6YR34	F6YR34	300	313	yes	3	0.0014265	67.358				1			0	0	0	0	0	0	0
KWEAAGAAADFR	12	1	1291.63	Q861N1;Q861M9	Q861N1	86	97	yes	2;3	8.9714e-12	166.66	2	2	2	3	2	2	579140000	293520000	68959000	25767000	152690000	16163000	22039000
KWEAAGVAEDFR	12	1	1377.67	F2VYX6;Q95479	F2VYX6	166	177	no	2;3	0.00063467	121.21	1	1	1	2	2	1	500130000	200740000	224700000	24639000	5372700	35428000	9252500
KWQEEVEVYR	10	1	1364.67	F6Z2L5	F6Z2L5	130	139	yes	2;3	8.5565e-06	134.26	9	8	3	6	8	12	1572300000	274570000	547170000	218770000	257660000	251790000	22338000
KYPVAHFTDQILK	13	1	1558.85	F7CZW9	F7CZW9	305	317	yes	2;3;4	0.0017745	74.475	4	3	2	3	5	3	395020000	113810000	95142000	45362000	68129000	59006000	13565000
KYSNPSNCFGR	11	1	1328.59	F6RI47;F6R942	F6RI47	271	281	yes	2;3	2.0223e-34	210.6	3	2	4	6	4	2	7916000000	1488100000	1527300000	1968300000	1184600000	1498300000	249440000
KYVLPNFEVK	10	1	1235.69	F6XSF7	F6XSF7	241	250	yes	2;3	0.0036447	134.23	2	2	2	2	2	2	448230000	92185000	61328000	79240000	99769000	98591000	17115000
LAAAVSNFGYDLYR	14	0	1558.78	F7BKE1;B8K250	F7BKE1	54	67	yes	2	0.00049968	138.76	1	1		1	1	1	454320000	110160000	100360000	78955000	73892000	90955000	0
LAADDFR	7	0	806.392	F7ATL5;F6YIA9;F6ZXQ2;F6W8W3;F7DL86;F6VY00;F6UU86;F6ZTT5;F6VDK7;F7CDG2;F6TTN2;F7DNA3;F6QSZ1;F6ZYG9;F6VZ15;F6Q1M4;F6SKY2;F6SJK9;F6SQQ0;F6WDW3;F6SS14;F6PJX6;F6ZEQ3;F6Z000	F6SJK9	119	125	no	2	0.025613	118.01	1	1	1	1	1	1	132010000	25287000	11888000	9789500	71221000	8056200	5764200
LAAGAQQIDVSK	12	0	1199.65	F6USP9;P80010	F6USP9	652	663	yes	2	0.0029162	125.7	1	1	1	1	1	1	4353100000	1655200000	916350000	932360000	0	581470000	267710000
LADEADKYK	9	1	1051.52	F6QQT6	F6QQT6	112	120	no	2;3	0.021926	130.22	2	2	2	2		2	522230000	122830000	0	125630000	168000000	77794000	27970000
LAGGTGACNGR	11	0	1032.48	F7BXD8	F7BXD8	124	134	yes	2	5.4384e-35	214.64			1		1		294270000	0	235730000	0	0	0	58538000
LAHHVPQSPR	10	0	1140.62	F7DZ01	F7DZ01	362	371	yes	3	0.0069679	74.424	1	1	1	1	1	1	143950000	44132000	22820000	20038000	24132000	29171000	3652200
LALDNGGLAR	10	0	998.551	F6R3F4	F6R3F4	428	437	yes	2	5.8045e-12	179.21	1	1	1	1	1	1	852720000	225580000	226980000	92717000	167850000	76094000	63506000
LASADIETYLLEK	13	0	1464.77	Q8MJV1;F6QLB5;F6UP52;F6Q903;Q8MJU9;F6YJN7;F6WS68;F6WZ86;Q8MJV0;F6R839;F6SUC3	Q8MJV0	261	273	no	2	0.0010388	109.6					1		27937000	0	27937000	0	0	0	0
LASAYGAEQLQSYCGR	16	0	1772.82	F7D7M0	F7D7M0	230	245	yes	2	0.015458	51.875	1			1	1		28159000	7144400	11868000	0	9145900	0	0
LASLFGIR	8	0	875.523	F7DZ01	F7DZ01	73	80	yes	2	0.02983	101.69		1					3973100	0	0	0	0	3973100	0
LASYLDK	7	0	808.433	F7ATL5;F6YIA9;F6ZXQ2;F6W8W3;F7DML0;F6Z8D6;F6SJK9;F6SQQ0;F6WDW3;F6SS14;F6PJX6;F6ZEQ3	F6SJK9	47	53	no	2	0.045002	101.69	1	1	1	1	1		102660000	14740000	11537000	0	56013000	14596000	5777400
LASYLDKVR	9	1	1063.6	F7ATL5;F6YIA9;F6ZXQ2;F6W8W3;F7DML0;F6Z8D6;F6SJK9;F6SQQ0;F6WDW3;F6SS14;F6PJX6;F6ZEQ3	F6SJK9	47	55	no	3	0.048066	74.464	1	1					16744000	0	0	0	7671000	9073000	0
LATALSLSNK	10	0	1016.59	F6YCW8;F6YE73;Q7YQQ6	F6YCW8	3351	3360	yes	2	0.0027	106.68	1		1	1			25081000	6724900	0	0	6943700	0	11413000
LATGINLFTNR	11	0	1218.67	F7AXF6	F7AXF6	177	187	yes	2	0.0018975	143.03	1	1	1	1	1	1	117480000	32475000	28248000	19379000	16202000	15726000	5445100
LAVDNIK	7	0	771.449	F6PPQ0	F6PPQ0	381	387	yes	1;2	0.039434	108.24	2	2	1	2	2	2	429440000	94607000	80431000	71684000	93978000	73088000	15655000
LAVPEGK	7	0	712.412	F6YCW8;F6YE73;F6Z5E1	F6YCW8	92	98	yes	2	0.048932	97.071	1	1	1	1	1	1	567080000	101800000	150240000	75698000	130640000	61386000	47326000
LAVTTHGSPCLVWASSDAEALSK	23	0	2399.18	F7BFJ1	F7BFJ1	226	248	yes	2;3	6.3316e-66	245.19	2	2	2	2	2	2	9025600000	1898900000	1997200000	1705900000	1258900000	1529600000	635030000
LCEIGSDDCYVGDGYSYR	18	0	2127.85	F6VZ73	F6VZ73	161	178	yes	2	1.3841e-09	125.61	1	1	1	1	1	1	187060000	46090000	52654000	27292000	31185000	25699000	4137000
LCMAALK	7	0	805.419	F6T0P6	F6T0P6	121	127	yes	2	0.042236	104.94	1	1	1	1	1	1	2088800000	410040000	541530000	331560000	374760000	292810000	138090000
LCNNPTPQFGGK	12	0	1331.63	F6YR34	F6YR34	518	529	yes	2	0.0023556	105.94			1	1	1	1	47369000	19121000	26788000	0	0	0	1459900
LCQACR	6	0	806.353	F6SP74	F6SP74	70	75	yes	2	0.041283	112.88	1	1	1	1	1	1	922700000	204660000	186180000	194360000	142720000	154930000	39851000
LCQDLGSGAFR	11	0	1222.58	F6X449	F6X449	151	161	yes	2	2.9523e-36	221.94	1		1	1	1	1	489740000	128800000	88579000	102460000	142240000	0	27659000
LCSQYAAYGK	10	0	1159.53	F6T0P6	F6T0P6	219	228	yes	2	0.0045782	100.02	1	2	2	2	2	1	2017400000	422700000	548830000	336450000	218100000	301150000	190210000
LCTAPLPK	8	0	898.495	F6SP74	F6SP74	405	412	yes	2	0.056872	89.369	1	1		1	1	1	235780000	64364000	60212000	33341000	38980000	38881000	0
LCTVATLR	8	0	932.511	F7BAY6;Q5XLE4;P35747	F7BAY6	98	105	no	2	1.0782e-19	203.49	14	12	11	12	15	16	126100000000	23097000000	24544000000	21447000000	25356000000	21691000000	9960600000
LCVLHEK	7	0	897.474	F7BAY6;Q5XLE4;P35747	F7BAY6	483	489	no	2	0.0093497	132.96	4	3	1	3	2	5	57692000000	9265500000	9600800000	14809000000	11334000000	9344500000	3338500000
LCVLHEKTPVSEK	13	1	1538.81	F7BAY6;Q5XLE4;P35747	F7BAY6	483	495	no	2;3;4	0.010653	100.48		3				2	125560000	0	0	71257000	0	54306000	0
LDAPTNLR	8	0	898.487	F7CN05;F7CN11;F7CS60	F7CN05	996	1003	yes	2	1.0782e-19	203.49			1	1	1	1	468340000	164770000	124390000	159060000	0	0	20118000
LDAQASFLPK	10	0	1088.59	F6QX36	F6QX36	205	214	yes	2	4.8606e-05	141.48	1	1	1	2	1	1	650900000	129360000	121300000	97430000	134450000	98582000	69767000
LDEAEQLALK	10	0	1128.6	Q8MJV1;F6QLB5;F6UP52;Q8MJV0;F6R839;F6SUC3	Q8MJV0	1800	1809	no	2	2.4091e-10	137.14					1		0	0	0	0	0	0	0
LDGFPPGRPSPNNLDQICLPNR	22	1	2476.23	F6QYS3	F6QYS3	169	190	yes	3	6.4437e-05	83.423	2	2	2	3	3	2	197580000	26287000	44948000	28017000	29786000	46047000	22493000
LDGICWQVR	9	0	1145.57	F6Y0C1	F6Y0C1	91	99	yes	2	0.00044009	143.11	1	1	1	1	1	1	165990000	46073000	41772000	23618000	31568000	18490000	4463900
LDHHTDKYDSNK	12	1	1471.67	F6UZI2	F6UZI2	70	81	yes	3	0.0008886	120.55	1	1		1	1		148760000	28058000	31476000	0	40690000	48538000	0
LDHRPPHIGDTLR	13	1	1525.81	F6XSF7	F6XSF7	483	495	yes	2;3;4	9.7897e-09	144.51	4	2	2	6	5	2	1014100000	111530000	249250000	323710000	226950000	82327000	20363000
LDNHQTR	7	0	882.431	F6XSF7	F6XSF7	1352	1358	yes	2	0.043118	103.91	1		1	1			394120000	151340000	0	0	170680000	0	72094000
LDNIYDSDK	9	0	1081.49	F6YCW8;F6YE73	F6YCW8	1728	1736	yes	2	0.00033181	150.36	1	1			1	1	161070000	0	37428000	35838000	52336000	35471000	0
LDNVFNK	7	0	848.439	F7DU87;Q0PMN3	F7DU87	29	35	yes	2	0.015788	126.24	1	1	1			1	105300000	0	0	13556000	45630000	34180000	11930000
LDSHGCIMQQVK	12	0	1414.67	F6QAD8;F6R6K3;F6R7S3	F6QAD8	294	305	yes	2;3	3.5539e-23	195.57	2	2	2	2	2	2	2697700000	581430000	719970000	517220000	475710000	342980000	60369000
LDVAGSLEGYLR	12	0	1291.68	F6YCW8;F6YE73;G5CW75	F6YCW8	3615	3626	yes	2	1.9404e-30	238.32	1	1	1	1	1	1	143310000	17917000	20514000	21556000	25335000	29860000	28128000
LDVTTSIDR	9	0	1018.53	F6YCW8;F6YE73;G5CW75	F6YCW8	3646	3654	yes	2	0.0013238	127.56			1	1	1		151440000	65730000	83354000	0	0	0	2357100
LDYQEGLPGR	10	0	1146.57	F6R3F4	F6R3F4	923	932	yes	2	8.275e-05	155.1	1	1	1	1	1	1	2065300000	444700000	446810000	367070000	477840000	241020000	87874000
LEAEDR	6	0	731.345	F6W4R2	F6W4R2	97	102	yes	2	0.044951	109.7		1		1			69525000	28119000	0	0	0	41406000	0
LECNGENDCGDNSDER	16	0	1882.67	F6YQL3	F6YQL3	156	171	yes	2	6.0209e-05	83.314	1	1		1	1	1	44242000	8858100	8289800	5086800	9867900	12139000	0
LEDPLLNK	8	0	940.523	F7BLE3	F7BLE3	1203	1210	yes	1;2	0.0002071	157.21	2	2	1	2	1	1	1578200000	306500000	337630000	276530000	314790000	243860000	98886000
LEDSVTYYCSR	11	0	1391.6	F6RMD0	F6RMD0	183	193	yes	2;3	5.278e-26	205.14	3	3	1	3	3	3	1815500000	387840000	391060000	328770000	375240000	275890000	56749000
LEDVDQVTLHSYK	13	0	1545.77	F7DL17;F7CTJ3;F7DAF6	F7DL17	64	76	yes	2;3	3.7792e-20	209.85	2	2	2	2	2	2	4506600000	849020000	715490000	951580000	1281600000	617430000	91467000
LEEPLLNK	8	0	954.539	F7BTW7;F7E454;F7CJG3	F7BTW7	1201	1208	yes	2	0.0013044	139.68	1	1	1	1	1	1	974690000	187110000	231810000	142940000	118600000	145360000	148880000
LEEVNTYR	8	0	1022.5	F6RZ27	F6RZ27	66	73	yes	2	3.4816e-29	222.08	1	1	1	1	1	1	362920000	69345000	57820000	68719000	79500000	64739000	22798000
LEGPVLDHR	9	0	1034.55	F7AXF6	F7AXF6	188	196	yes	2	0.0051409	115.49	1			1	1	1	64562000	0	23200000	17221000	24140000	0	0
LEKDTEGLR	9	1	1059.56	F6Z2L5	F6Z2L5	98	106	yes	3	0.057153	67.507				1			0	0	0	0	0	0	0
LELEETVFLQATDR	14	0	1662.85	F7BUV8	F7BUV8	215	228	yes	2	0.0046108	87.001	1	1		1	1	1	27253000	5242700	5530800	5856700	6972600	3649900	0
LELLSLSR	8	0	929.555	F6QFD9	F6QFD9	363	370	yes	2	0.0013449	138.83	1	1	1	1	1	1	161400000	31533000	38173000	29075000	28495000	24380000	9746800
LELNVDSGK	9	0	973.508	F6XSF7	F6XSF7	577	585	yes	1;2	0.00042867	145.63	2	2	1	3	2	1	1041200000	224870000	283530000	157280000	253930000	97507000	24067000
LELQGCEVNGCSTPLGMESGK	21	0	2265.01	F7DZ01	F7DZ01	1308	1328	yes	3	0.047234	21.616	1	1	1				11511000	0	0	0	3358800	6706100	1445900
LENCNYAVELGK	12	0	1408.67	F6WA57;K9KEC7;F7AGA5	F6WA57	458	469	yes	2	0.0074511	79.974					1		0	0	0	0	0	0	0
LENEIQTYR	9	0	1164.58	F6SJK9;F6SQQ0;F6WDW3;F6SS14	F6SJK9	332	340	yes	2	1.7151e-53	241.52	1	1		1		1	119540000	22772000	0	12605000	76629000	7531200	0
LENQEMVVLEAHEAQGDVSVTVTVQDFPAK	30	0	3282.61	F7BTW7;F7E454;F7CJG3	F7BTW7	36	65	yes	3	0.021728	23.887		1	2	2	1	2	69422000	16182000	13600000	20856000	0	14206000	4577400
LEPGKEYLIMGLDGATYDLK	20	1	2225.13	F6XSF7	F6XSF7	1683	1702	yes	2;3	2.6894e-06	136.81	2	2	1	2	3	2	515450000	124610000	133250000	73191000	77653000	72505000	34252000
LEPSQQEEYYGK	12	0	1469.67	F6ZJP9	F6ZJP9	172	183	yes	2	0.0015922	118.71	1	1		1	1	1	143950000	40357000	43439000	15918000	18527000	25705000	0
LEQGVQLPLDF	11	0	1257.66	F7DU87	F7DU87	239	249	yes	2	0.0025932	113.18	1	1	1	1	1	1	250760000	16590000	11213000	12898000	121050000	60711000	28295000
LEQITQTEQIR	11	0	1357.72	F7BPJ9	F7BPJ9	74	84	yes	2	0.0017811	121.96	1	1	1	1	1	1	114440000	10316000	35432000	30206000	11445000	24664000	2380100
LEYPTCER	8	0	1066.48	F6UHF2;F6ZR63;F6U1J0;F7E2N9	F6ZR63	1228	1235	no	2	0.00041963	154.31	1	1	1	1	1	1	1797000000	398650000	371690000	297290000	322470000	324300000	82571000
LFACSNK	7	0	838.401	Q28372;F7DHZ1;F7E2D1;Q6X9X6	Q28372	618	624	yes	2	0.017088	124.89	1	1		1	1	1	1192200000	270410000	234800000	284100000	190550000	212340000	0
LFDSYPITVTVPEVVSR	17	0	1921.02	Q29482	Q29482	409	425	yes	2;3	6.1928e-16	147.07	2	2	2	2	2	2	3457800000	786690000	650740000	452870000	705300000	669290000	192920000
LFDYCDVPQCESSPFDCGK	19	0	2322.92	F6USP9;P80010	F6USP9	558	576	yes	2;3	5.2665e-10	119.01	2	2	2	2	2	2	277510000	48484000	50208000	37406000	73172000	32150000	36089000
LFDYCDVPQCESSPFDCGKPK	21	1	2548.07	F6USP9;P80010	F6USP9	558	578	yes	2;3	5.1729e-05	89.859	2	2	2	2	2	2	5164100000	999580000	1087800000	1252500000	814410000	722140000	287670000
LFGEVTSPLYPK	12	0	1349.72	F6Z5L1	F6Z5L1	25	36	yes	2	0.0022288	100.48	1	1	1	1	1	1	579090000	126040000	91581000	98830000	124830000	101490000	36306000
LFHAGYK	7	0	834.439	F7BFJ1	F7BFJ1	493	499	yes	2	0.046857	99.511	1	1	1	1	1	1	1524300000	281920000	359010000	317660000	297380000	246170000	22147000
LFLEPSR	7	0	860.476	F6USP9;P80010	F6USP9	664	670	yes	2	3.9358e-05	166.13	1	1	1	1	1	1	1438300000	350840000	453600000	164870000	254700000	121260000	93040000
LFLNSVR	7	0	847.492	F6YCW8;F6YE73;F6Z5E1	F6YCW8	757	763	yes	2	0.032879	113.08	1				1		44371000	0	44371000	0	0	0	0
LFNPLSSLQTLR	12	0	1387.78	F6QFD9	F6QFD9	188	199	yes	2	1.1947e-16	179.8	1	1	1	1	1	1	271060000	50106000	48707000	37435000	59286000	44744000	30781000
LFSSSCPGGIMLK	13	0	1395.69	F6UEG9	F6UEG9	123	135	yes	2	4.4972e-09	156.83	1	1	1	1	1	1	317280000	66415000	84494000	52207000	47824000	53528000	12814000
LGACDNTLK	9	0	990.48	F7CYR1	F7CYR1	125	133	yes	1;2	8.2838e-06	161.9	2	2	2	2	2	2	5724300000	1301900000	996260000	883560000	1179500000	867250000	495810000
LGENCINTVGSFR	13	0	1465.7	F7ABC9	F7ABC9	210	222	yes	2	0.00052849	124.67	1	1		1	1	1	40623000	11919000	15351000	6033500	7319200	0	0
LGEYDLR	7	0	864.434	F6X667	F6X667	267	273	yes	2	0.0024317	148.07	1	1	1	1	1	1	155370000	33573000	33980000	21176000	38076000	22324000	6244800
LGMNTVAWQEIR	12	0	1416.72	F6PPQ0	F6PPQ0	351	362	yes	2	0.033697	75.294	1						0	0	0	0	0	0	0
LGNQEPGGQAALK	13	0	1281.67	F6X449	F6X449	52	64	yes	2	0.0009866	117.01	1	2	1	1	1	1	1308900000	258200000	299320000	163330000	442050000	99932000	46118000
LGPHAEELR	9	0	1020.54	F6RZ27	F6RZ27	135	143	yes	2	0.0010323	129.72	1	1	1	1	2	1	315780000	64836000	142080000	41536000	34877000	23007000	9444600
LGPYAGDVEGHLSFLEK	17	0	1830.92	F6RZ27	F6RZ27	329	345	yes	2	1.8342e-11	138.02	1	1		1	1	1	125440000	16845000	26261000	30382000	16983000	34969000	0
LGQYASPVAK	10	0	1032.56	F6XSF7	F6XSF7	697	706	yes	2	0.00168	112.84	1	1	1	1	1	1	2470800000	503240000	677850000	208840000	753880000	267610000	59406000
LGSYEHR	7	0	860.414	F7DL17;F7CTJ3;F7DAF6	F7DL17	191	197	yes	2	1.1631e-05	170.31	1	1		1	1	1	1480300000	185510000	430360000	284940000	439230000	140300000	0
LGVRPSQGGEAPR	13	1	1322.71	F7CN05;F7CN11;F7CS60	F7CN05	1116	1128	yes	3	1.2365e-08	129.54	1	1		1	1	1	1408800000	465510000	431950000	389450000	49712000	72225000	0
LGVSVDK	7	0	716.407	F7AXF6	F7AXF6	398	404	yes	2	0.043874	103.02		1	1	1	1	1	186020000	48950000	54898000	45593000	0	31153000	5426300
LGVYELLLK	9	0	1046.64	F6R3F4	F6R3F4	153	161	yes	2	3.3922e-06	167.9	1	1	1	1	1	1	1507600000	309430000	265380000	235340000	320000000	234670000	142810000
LHDLQLLGR	9	0	1063.61	F6YCW8;F6YE73;F6Z5E1	F6YCW8	748	756	yes	2;3	0.0030324	131.03	1	2	1	2	2	2	333410000	74567000	82154000	65955000	55113000	44562000	11063000
LHEGFSPTTFQHDLALVR	18	0	2067.05	F7DGR1	F7DGR1	446	463	yes	3;4	8.1297e-39	186.43	2	2	2	1	2	1	290260000	45085000	56195000	29546000	39990000	77023000	42426000
LHGGPQVQLVAESPWLK	17	0	1858.01	F6XSF7	F6XSF7	108	124	yes	2;3	1.9479e-38	216.34	2	2	2	2	2	2	1203100000	281220000	116860000	168300000	272800000	266730000	97162000
LHIDEIDFK	9	0	1128.58	F6WUE0;A7LP08	F6WUE0	187	195	yes	3	0.039562	59.245					1	1	3247800	0	3247800	0	0	0	0
LHLLNMGGSR	10	0	1096.58	F7DZ01	F7DZ01	1080	1089	yes	3	0.0098678	51.488	1	1		1	1	1	71545000	19482000	17892000	18308000	14585000	1277400	0
LHLQPGR	7	0	819.472	F7DL17;F7CTJ3;F7DAF6	F7DL17	198	204	yes	2	0.015977	126.05	1	1	1	1	1	1	1629100000	290580000	461930000	300670000	239710000	297280000	38965000
LHNYGVYTK	9	0	1093.56	F6X667	F6X667	427	435	yes	2;3	0.0097458	107.29			1	1	1		51496000	16276000	25631000	0	0	0	9589800
LHVDPENFR	9	0	1125.56	P02062;D1MPT0;F6RDD3;F6RF57;Q95N60;Q95N59;Q95N62;Q95N61;Q9XT15;Q9TUY6;Q9TUY5;Q95183;A0A1K0FUK6	P02062	96	104	no	2;3	7.6822e-05	154.31	2	2	2	2	2	2	3492200000	1049900000	493850000	766870000	573390000	521320000	86942000
LHVMAGR	7	0	782.422	F6X1I8	F6X1I8	372	378	yes	2	0.030543	114.67	2	2	1	2	1	1	5328900000	1049100000	1421700000	1039600000	731600000	888010000	198930000
LHVSEQNAQR	10	0	1180.59	F6YCW8;F6YE73;F6Z5E1	F6YCW8	294	303	yes	2;3	5.7997e-25	202.17	2	2	2	2	2	2	1783900000	317580000	521330000	318810000	212820000	365690000	47658000
LHYTTEVIK	9	0	1102.6	F6Z5L1	F6Z5L1	300	308	yes	2;3	0.0044233	98.458	5	2	2	5	3	4	273510000	53821000	49075000	53394000	46864000	64399000	5960900
LIAESVIIHPGWEFLDTPETR	21	0	2422.25	F7BQD6	F7BQD6	509	529	yes	3	1.0585e-15	127.5	1	1	1	1	1		160360000	41959000	22651000	0	23238000	38087000	34426000
LIANNFADHQK	11	0	1269.65	F7DZ01	F7DZ01	129	139	yes	2;3	0.0030858	106.68	1	2	2	2	2	2	236830000	48374000	33510000	76517000	21872000	48016000	8539300
LIANTLCNSR	10	0	1160.6	F6VZ73	F6VZ73	434	443	yes	2	4.0232e-08	166.52	1	1		1	1		290640000	55654000	75287000	0	66896000	92805000	0
LIAPVAEEATVPNNK	15	0	1564.85	C6L1J5;B7XH74;Q6XA07;L7MRS7;C6L1L3;C6L1L2;C6L1K8	C6L1J5	8	22	yes	2	0.060253	58.37	1			1	1	1	38077000	14036000	9311000	8759600	5969900	0	0
LIASMTSDSLR	11	0	1192.61	F6UZI2	F6UZI2	713	723	yes	2	0.00016809	134.25		1	1	1	1	1	125370000	37510000	45587000	19316000	0	14548000	8404800
LIIYENSK	8	0	978.539	F7CCI0	F7CCI0	66	73	yes	2	0.0012931	139.92	2	3	3	2	2	3	870710000	219270000	202890000	154450000	76994000	146800000	70301000
LIIYENSKR	9	1	1134.64	F7CCI0	F7CCI0	66	74	yes	2;3	5.4227e-09	177.65	5	4	2	6	5	4	779030000	202090000	250510000	143970000	77074000	81225000	24162000
LINDYVEK	8	0	992.518	F6ZLR1	F6ZLR1	182	189	yes	2	0.033661	97.798	1	1	1	1	1	1	771720000	107240000	147710000	186470000	173360000	111770000	45174000
LIQDVWGIEGPIDAAFTR	18	0	2000.04	F6V881	F6V881	192	209	yes	2;3	1.4191e-11	169.04	2	2	2	2	2	2	1475400000	287640000	440490000	171970000	260180000	233140000	82007000
LISHNGYCDGK	11	0	1262.57	Q28369;F6W135	Q28369	185	195	yes	2;3	0.0004915	137.46	2	2	2	2	2	2	1012200000	134920000	314290000	205350000	136500000	194810000	26319000
LISSALELDQEYTFGQVVR	19	0	2167.12	F6ZR63	F6ZR63	157	175	yes	2;3	1.5352e-77	173.51	3	2	1	2	2	2	248280000	61007000	42476000	31356000	49933000	40207000	23299000
LISVDTEHSDIYLQNGPDR	19	0	2171.05	F6PQ46	F6PQ46	43	61	yes	2;3;4	2.9752e-185	361.51	3	3	2	2	2	3	3716800000	840770000	758240000	625560000	737490000	603210000	151530000
LITHEESYSHK	11	0	1342.65	F6ZR63	F6ZR63	758	768	yes	2;3	0.00064593	139.98	2	2	1	2	2	2	687740000	48647000	149500000	174820000	112040000	202070000	656810
LIVTGTSVQR	10	0	1072.62	K9KDK6	K9KDK6	189	198	yes	2;3	8.8697e-05	126.67	2	2	2	3	3	1	3319700000	981670000	961650000	303670000	461590000	526770000	84333000
LKACCDKPLLQK	12	2	1472.78	F7BAY6;Q5XLE4;P35747	F7BAY6	298	309	no	2;3;4	0.00058781	129.71	2	2		3	2	3	273830000	110210000	26134000	60898000	49508000	27072000	0
LKCSSFQK	8	1	996.506	Q5XLE4	Q5XLE4	221	228	yes	2	0.027801	141.39	1	1		1	1	1	363310000	69630000	50325000	75447000	56713000	111200000	0
LKPEPDAQCAAFQEDPDK	18	1	2057.94	F7BAY6;Q95MC2;Q5XLE4;P35747	F7BAY6	139	156	no	2;3	2.4014e-21	205.96	7	4	6	5	6	6	19266000000	4256500000	2752900000	3101700000	4847700000	2950500000	1356900000
LKPEPDAQCAAFQEDPDKFLGK	22	2	2503.21	F7BAY6;Q95MC2;Q5XLE4;P35747	F7BAY6	139	160	no	2;3;4;5	6.7789e-22	200.4	13	15	13	13	15	12	63581000000	11548000000	11024000000	14781000000	10957000000	9471000000	5800100000
LKPVDGHCALESK	13	1	1452.74	F6VZ73	F6VZ73	380	392	yes	4	0.015193	45.115		1				1	33568000	0	0	22006000	0	11563000	0
LLCNGDNDCGDQSDEANCR	19	0	2211.82	F7AXF6	F7AXF6	140	158	yes	2	4.9513e-07	126.76	1			1	1		52178000	19021000	17883000	0	15274000	0	0
LLCPDGTR	8	0	930.459	P27425;Q9TUP2;O97974	P27425	588	595	yes	2	0.057096	89.296	1	1	1	1	1		52235000	15329000	17078000	0	14431000	1197300	4200400
LLDKFQEDVK	10	1	1233.66	F7DXM5	F7DXM5	154	163	yes	2;3	0.0047096	94.309	2	2	1	2	2	2	741390000	190070000	253650000	98803000	120350000	71476000	7041700
LLDNWDSLGTTLGK	14	0	1531.79	F6Z2L5	F6Z2L5	69	82	yes	2;3	6.6589e-09	180.97	5	5	5	5	5	5	93598000000	15211000000	15630000000	14656000000	17627000000	18340000000	12134000000
LLDSLPADAR	10	0	1069.58	F7CZW9	F7CZW9	253	262	yes	2	2.132e-08	169.12	1	1	1	1	1	1	2825500000	654380000	329450000	537480000	745960000	443540000	114660000
LLEACTFHR	9	0	1145.57	P27425;Q9TQV4	P27425	697	705	yes	2;3	5.6146e-22	206.5	5	5	4	4	5	5	21713000000	3690000000	3770900000	3437600000	3949000000	4804200000	2061000000
LLESQPPAA	9	0	924.492	F6RMK1	F6RMK1	103	111	yes	2	0.039706	86.866				1	1	1	169250000	62069000	49673000	57503000	0	0	0
LLETEEQAAFPLGGTHPR	18	0	1965	F6T7X3;F7DLT3	F6T7X3	568	585	yes	2;3	6.9914e-30	169.62	2	2		2	1	2	504780000	144430000	70096000	94641000	114260000	81353000	0
LLIGTVFHK	9	0	1026.62	F7DTV1;F7BR80	F7DTV1	341	349	yes	2	0.039779	86.833	1	1	1	1	1	1	184170000	28740000	54685000	27248000	36704000	29181000	7608500
LLIYAASNR	9	0	1019.58	F7B3M7	F7B3M7	66	74	yes	2	0.0011885	128.57	1	1	1	1	1	1	710050000	66178000	336920000	92374000	110760000	80801000	23012000
LLIYAASSR	9	0	992.565	F6VC90	F6VC90	46	54	yes	2	0.020697	95.605				1	1		13651000	0	13651000	0	0	0	0
LLIYEGNK	8	0	948.528	A0A0A1E6R9	A0A0A1E6R9	67	74	no	2	0.0015422	134.66	1	1	1	2		1	199100000	41813000	0	36921000	36723000	79969000	3678600
LLIYEGNKR	9	1	1104.63	A0A0A1E6R9	A0A0A1E6R9	67	75	no	2;3	0.0033055	111.17	2	3		2	5	2	269190000	47303000	88957000	47156000	45966000	39807000	0
LLIYGVSSR	9	0	1006.58	F6YZK3	F6YZK3	64	72	yes	2	0.0004155	140.09	1	1	1	1	1	1	563270000	179350000	164670000	64473000	73558000	56150000	25067000
LLIYSVSNR	9	0	1063.6	F7E481	F7E481	71	79	yes	2;3	0.0025285	90.657	1	2			2	2	97356000	0	28754000	37287000	10673000	20643000	0
LLIYYTNK	8	0	1026.58	A0A0A1E3W4	A0A0A1E3W4	67	74	no	2	0.0011362	143.23		1		1	1	1	61422000	24691000	28470000	8261000	0	0	0
LLLHENQLQWVHHR	14	0	1821.98	F7AY62	F7AY62	201	214	yes	3	0.0010616	52.555				1			14069000	14069000	0	0	0	0	0
LLLQDTDR	8	0	972.524	F6R3F4	F6R3F4	870	877	yes	2	6.2144e-13	186.67	1	1	1	1	1	1	1988800000	454870000	428420000	423960000	378200000	239920000	63396000
LLLQQISLPK	10	0	1151.73	F6RI47;F6R942	F6RI47	1301	1310	yes	2;3	0.00090589	138.1	1	2	1	2	1	2	33327000000	5545600000	4117100000	6139200000	5736000000	6583000000	5206300000
LLLVEPEGIK	10	0	1109.67	F6QAD8;F6R6K3;F6R7S3	F6QAD8	897	906	yes	1;2	0.00168	112.84	2	1	1	2	2	2	1236900000	217770000	333450000	198260000	233210000	203760000	50433000
LLLVEPEGIKK	11	1	1237.76	F6QAD8;F6R6K3;F6R7S3	F6QAD8	897	907	yes	3	0.0018638	94.616	1	1		1	1	1	811690000	181190000	247690000	131470000	113750000	137590000	0
LLNLDGTCADSYSFVFAR	18	0	2047.97	Q28369;F6W135	Q28369	140	157	yes	2	2.9803e-38	235.73	1	1	1	1	1	1	156520000	33698000	37961000	25487000	18649000	31832000	8895000
LLQEEFPGIPSPLDAAVECHR	21	0	2377.17	F6X1I8	F6X1I8	133	153	yes	2;3;4	1.3963e-22	196.18	3	5	4	4	3	3	15695000000	2443900000	2271500000	3027700000	2922100000	3174800000	1855000000
LLQVLHADSGPCLPHLLSR	19	0	2125.15	F6X449	F6X449	132	150	yes	4	4.6217e-05	85.146	1	1	1	1	1	1	226930000	38722000	41092000	39487000	30517000	46814000	30293000
LLSDPDQGVEVTGQYETEK	19	0	2107	F6R3F4	F6R3F4	770	788	yes	2;3	1.4101e-62	210.91	3	3	3	4	5	4	1156900000	251210000	122030000	281860000	262090000	164590000	75117000
LLSPLLPDSLTTWEIHGMSLSK	22	0	2437.29	F6XSF7	F6XSF7	800	821	yes	3	1.3687e-13	118.44	1	1	1	1	1	1	214900000	42215000	63134000	28709000	22265000	28554000	30020000
LLSQYYGAGVAGDPGFR	17	0	1769.87	F6QDQ1	F6QDQ1	277	293	yes	2	0.0001587	92.925	1	1	1	1	1	1	109180000	18519000	17401000	28141000	22443000	19382000	3294000
LLSTLCSADVCQCAEGK	17	0	1910.85	F6XSF7	F6XSF7	1584	1600	yes	2;3	6.1664e-16	156.69	2	2	1	2	2	2	1173600000	272440000	276760000	151440000	260500000	168820000	43624000
LLVVYPWTQR	10	0	1273.72	P02062;D1MPT0;F6RDD3;F6RF57	P02062	31	40	yes	2	8.5558e-25	198.54	1	1	1	1	1	1	822220000	188890000	71322000	184140000	156000000	196340000	25526000
LLVYTILPDGEVVGDSAK	18	0	1888.02	F6RI47;F6R942	F6RI47	540	557	yes	2;3	9.4427e-12	171.29	11	10	5	11	10	8	47572000000	9551100000	8802300000	6132600000	9166200000	7504700000	6415500000
LNCEDIDECR	10	0	1322.52	F6T0M8;F6PVG3	F6T0M8	287	296	yes	2	6.465e-08	163.15	1	1		1	1	1	223120000	39504000	46045000	52003000	38402000	47168000	0
LNEISYEDHK	10	0	1246.58	F6RMD0	F6RMD0	339	348	yes	2;3	0.00017034	154.49	2	2	1	2	2	2	3533900000	807860000	403230000	739660000	903680000	661620000	17859000
LNILNAK	7	0	784.481	F7BM31	F7BM31	123	129	yes	2	0.014432	127.66			1				33600000	0	0	0	0	0	33600000
LNINLK	6	0	713.444	F6PPQ0	F6PPQ0	619	624	yes	2	0.028681	136.44	1	1		1	1		132700000	33093000	30171000	0	50154000	19277000	0
LNLVQR	6	0	741.45	C6L1J5;B7XH74;Q6XA07;L7MRS7	C6L1J5	107	112	no	2	0.049583	107.29	1			1	1		51047000	13018000	31479000	0	6549300	0	0
LNPLDYR	7	0	889.466	F6XSF7	F6XSF7	954	960	yes	2	0.0093497	132.96	1	1		1	1	1	1741000000	429910000	404430000	255260000	410640000	240810000	0
LNTLFQDK	8	0	977.518	F6RZ27	F6RZ27	58	65	yes	2	3.2936e-13	191.63	1	1		1	1	1	497920000	116800000	118510000	97366000	114150000	51089000	0
LNTLFQDKLEEVNTYR	16	1	1982.01	F6RZ27	F6RZ27	58	73	yes	3	2.3133e-05	84.41					1		11049000	0	11049000	0	0	0	0
LNVGGNIK	8	0	813.471	F6YCW8;F6YE73	F6YCW8	1779	1786	yes	2	0.00092682	131.3	1	1		1	1	1	61858000	0	16355000	13958000	18994000	12551000	0
LNVNIADLPGLR	12	0	1293.74	F6XSF7	F6XSF7	332	343	yes	1	0.0051379	72.096					1		4098900	0	4098900	0	0	0	0
LPCSENHLALALNR	14	0	1606.83	F7BAY6;Q5XLE4;P35747	F7BAY6	469	482	no	2;3;4	1.8965e-182	310.53	52	41	39	57	55	53	99634000000	30397000000	32343000000	5852400000	23456000000	4615600000	2970800000
LPCSENHLALALNRLCVLHEK	21	1	2486.29	F7BAY6;Q5XLE4;P35747	F7BAY6	469	489	no	3;4;5	4.508e-05	90.729	3	3	1	3		3	232110000	33566000	0	54559000	65464000	63350000	15174000
LPDFHIPENLFLK	13	0	1581.86	F6YCW8;F6YE73;F6Z5E1	F6YCW8	1227	1239	yes	3	0.0027953	61.423	1	1	1	1	1	1	121140000	23250000	21614000	16478000	27048000	21626000	11126000
LPDQLPMTEFSEGDNHDR	18	0	2099.92	Q29482	Q29482	265	282	yes	2;3	7.2379e-108	216.71	3	4	3	3	3	3	2905700000	692960000	748200000	408670000	574800000	359750000	121310000
LPDSSYQSINIPVTQNMVPSAR	22	0	2416.21	F7D7B5	F7D7B5	490	511	yes	3	1.6212e-13	117.82	1	1		1	1	1	131680000	31145000	32203000	26349000	21038000	20945000	0
LPECEAVCGK	10	0	1161.52	F6XWM5	F6XWM5	82	91	yes	2	2.2705e-05	145.16	1	2	2	2	2	2	28758000000	5460800000	6023700000	5072500000	5479700000	5389600000	1331500000
LPECEAVCGKPK	12	1	1386.66	F6XWM5	F6XWM5	82	93	yes	2;3	0.0014518	152.97	2	2	2	4	4	2	29494000000	8082100000	7757700000	4248400000	5161700000	3291800000	951940000
LPESER	6	0	729.366	F7BAY6;F6S4Y2;F7DX93;Q5XLE4;P35747	F7BAY6	463	468	no	2	0.014048	148.4	3	2	2	3	2	2	127550000000	23955000000	29359000000	25733000000	21586000000	18410000000	8504100000
LPESERLPCSENHLALALNR	20	1	2318.18	F7BAY6;Q5XLE4;P35747	F7BAY6	463	482	no	2;3;4	6.7236e-09	103.88	2	2	2	3	2	2	1897100000	660530000	530160000	229220000	164010000	238280000	74938000
LPFYCLAGYTTESGK	15	0	1705.8	F7C7J6	F7C7J6	55	69	yes	2	3.7957e-05	84.169	1	1			1	1	58976000	0	21814000	14103000	9306900	13753000	0
LPISVHR	7	0	820.492	F6XSF7	F6XSF7	845	851	yes	2	0.0012795	153.67	1	1		1	1	1	416960000	87387000	76857000	76281000	108730000	67705000	0
LPPNVVEESAR	11	0	1209.64	F6RI47;F6R942	F6RI47	939	949	yes	2;3	0.00021205	164.46	4	2	1	6	3	1	17771000000	3603200000	4182300000	2416300000	4260700000	2603200000	705760000
LPQQVNDYLNAFSWER	16	0	1978.95	F6YCW8;F6YE73	F6YCW8	2076	2091	yes	2	2.3943e-68	223.31	1	1	1	1	1	1	215680000	42308000	41121000	31395000	43173000	31374000	26305000
LPSANVYGLGEHVHQQYR	18	0	2067.03	F6PUW3	F6PUW3	258	275	yes	4	0.00064678	54.368	1	1				1	46054000	0	0	20497000	13098000	12459000	0
LPSPHNSLVR	10	0	1118.62	F7BAT4;A0A061DBP6	F7BAT4	431	440	yes	3	0.03613	48.44				1	1	1	58661000	17769000	17759000	23133000	0	0	0
LPSPSLFGNDVNNVLLTAECQTSNR	25	0	2745.34	F6PUW3	F6PUW3	158	182	yes	3	7.9662e-07	89.829					1		18393000	0	18393000	0	0	0	0
LPVASLEK	8	0	855.507	F7BQD6	F7BQD6	593	600	yes	2	0.0069359	123.69	1	1	1	1	1	1	322790000	64661000	70844000	61496000	58715000	52068000	15011000
LPWSTTCQQQMEELLPAK	18	0	2159.04	F6RMD0;K9KBR1	F6RMD0	609	626	yes	2;3	6.9757e-91	240.73	3	2	3	3	3	2	2565500000	562480000	451510000	333820000	512980000	459000000	245680000
LPYQCPK	7	0	904.448	F7APU2;F7AU56	F7APU2	40	46	yes	2	0.046857	99.511	2	2		3	2	1	272410000	77309000	79243000	18799000	44327000	52731000	0
LPYSVVR	7	0	832.481	F7BLE3;F7BTW7;F7E454;F7CJG3	F7BTW7	834	840	no	2	3.9358e-05	166.13	1	1		1	1	1	3367300000	672790000	817790000	567250000	788290000	521170000	0
LQAFLGVPGEDQGCTSR	17	0	1833.87	F6W4R2	F6W4R2	159	175	yes	2;3	1.9878e-05	107.09	2	2	3	2	2	2	425370000	90103000	77402000	76033000	96670000	61863000	23301000
LQDAEEHVEAVNAK	14	0	1551.75	Q8MJV0;F6R839	Q8MJV0	1400	1413	yes	2	0.0005529	103.34					1		25703000	0	25703000	0	0	0	0
LQDVDDASITQK	12	0	1331.66	F7B3I5	F7B3I5	26	37	yes	2	0.00020702	133.23	1	1	1	1	1	1	1408400000	215850000	140150000	370880000	335120000	303990000	42424000
LQERPQIQR	9	1	1166.65	F6REX3	F6REX3	1408	1416	yes	2;3	0.00026407	128.28	4	1	1	2	4	4	1548000000	508040000	388050000	176060000	223870000	192950000	59073000
LQETATWLLSQQQADGSFQDPCPVIHR	27	0	3124.5	F6XSF7	F6XSF7	1106	1132	yes	3;4	1.2813e-90	213.2	2	2	1	2	2	2	5038500000	1010000000	873210000	819340000	672340000	777750000	885870000
LQGGLSQLSLPLSAEPALGPYK	22	0	2238.23	F6REX3	F6REX3	180	201	yes	2;3	3.4994e-117	254.58	2	2	2	2	2	2	2145000000	368840000	362440000	420740000	384110000	517700000	91188000
LQHELEEAEER	11	0	1381.65	Q8MJV1;F6QLB5;F6UP52	Q8MJV1	1901	1911	yes	2	0.0033203	102.06					1		22254000	0	22254000	0	0	0	0
LQHLEDTLTK	10	0	1196.64	B5BV04;B5BV07;B5BV11;B5BV10;B5BV06;B5BV13;B5BV09;B5BV08;B5BV12	B5BV07	287	296	no	2;3	0.001469	132.88	3	2	2	3	2	3	15625000000	3442700000	2428600000	3396000000	2514900000	3323900000	518720000
LQSIGTENTEENR	13	0	1489.7	F6SX98	F6SX98	61	73	yes	2	0.0010562	93.258			1	1			21612000	8806200	0	0	0	0	12805000
LQSLFDSPDFSK	12	0	1382.67	F7BKE1;B8K250	F7BKE1	334	345	yes	2	7.3182e-05	137.46	1	1	1	2	1	1	780500000	82334000	78028000	238990000	95202000	187970000	97980000
LQTLPGR	7	0	783.46	F6QFD9	F6QFD9	157	163	yes	2	0.004477	138.07		1		2		1	110750000	6169600	0	36119000	0	68463000	0
LRADCEDLQK	10	1	1246.6	F7BAT4;A0A061DBP6	F7BAT4	538	547	yes	3	0.039271	54.784				1		1	21837000	11857000	0	9980000	0	0	0
LREQLGPVTQDFWDK	15	1	1830.93	F6Z2L5	F6Z2L5	83	97	yes	2;3	6.5826e-54	226.51	2	2	2	2	2	2	3285400000	557150000	600040000	519930000	533600000	619890000	454760000
LREQLGPVTQDFWDKLEK	18	2	2201.15	F6Z2L5	F6Z2L5	83	100	yes	2;3;4	1.4527e-76	234.28	3	3	3	3	3	3	2109400000	334000000	514570000	312070000	258540000	242090000	448170000
LRSEGDGVYALNSEK	15	1	1636.81	F6XWM5	F6XWM5	57	71	yes	2;3	2.1294e-80	237.48	2	3	1	5	5	4	2121600000	499280000	912560000	324700000	175580000	197600000	11926000
LRVDPVNFK	9	1	1086.62	P01959;P01958;Q28383;Q95MA1	P01959	92	100	yes	3	0.0042638	97.431	1	1		1	1	1	158150000	71818000	36340000	13287000	20443000	16258000	0
LSCNSSGWSSPAPQCK	16	0	1764.76	F7BNQ2	F7BNQ2	471	486	yes	2	0.019105	48.004	1	1		1	1	1	88542000	27310000	20823000	16945000	13044000	10420000	0
LSCQCLGFGSGHFR	14	0	1624.72	F7CN05;F7CN11;F7CS60;Q28377	F7CN05	2140	2153	yes	2;3	2.029e-14	160.52	1	1	1	1	2	2	520830000	23433000	236650000	207990000	18564000	22306000	11887000
LSCQVTNLGTYDSLSISWTR	20	0	2300.11	H9GZN9	H9GZN9	239	258	yes	2;3	3.5587e-37	195.54	12	12	3	21	15	15	859560000	303810000	186520000	188050000	88236000	77717000	15227000
LSDASVLEAALESLAK	16	0	1615.87	F6RRV1	F6RRV1	157	172	yes	2;3	5.2494e-18	198.52	2	2	1	2	2	2	2766400000	525850000	1324200000	363530000	248550000	268550000	35719000
LSDNALSSLPQGVFGK	16	0	1631.85	F6QFD9	F6QFD9	200	215	yes	2	2.2483e-06	128.88	1	1		1	1	1	382770000	69287000	73529000	73551000	84346000	82055000	0
LSEEISNLGFSLLR	14	0	1576.85	F6SUS2	F6SUS2	8	21	yes	2	2.055e-37	203.83	1	1		1	1	1	46875000	11926000	5157500	5993500	10768000	13030000	0
LSESGFK	7	0	766.386	F7CN05;F7CN11;F7CS60;Q28377	F7CN05	2133	2139	yes	1;2	0.046384	146.87	1	2	1	1	1	2	275880000	40262000	30552000	146970000	24529000	28501000	5061600
LSGKPTHVNVSVVMAEADGTCY	22	1	2334.1	H9GZV1	H9GZV1	309	330	yes	3	0.00016576	65.25	3	3	3	5	4	5	380520000	95872000	84210000	110590000	39530000	34320000	15990000
LSGQSAISTQPEAVK	15	0	1514.79	F6YGF7;F6YMD9	F6YGF7	2563	2577	yes	2;3	0.00021323	80.706	2	2	2	1	1	2	1038800000	121820000	132390000	205640000	295850000	230900000	52234000
LSHDLR	6	0	739.398	F6Z5L1	F6Z5L1	603	608	yes	2	0.044341	110.23	1	1	1	1	1	1	281070000	93333000	7598900	57546000	80084000	41795000	708670
LSHLIK	6	0	709.449	F6T0P6	F6T0P6	233	238	yes	2	0.037678	116	1			1	1		3530500000	1164400000	1124100000	0	1242000000	0	0
LSISGCYDLK	10	0	1154.56	F7CSL8;F7CYP1	F7CSL8	318	327	yes	2	0.00088621	122.13	5	5	2	4	2	5	935950000	233820000	153620000	204080000	210280000	105250000	28894000
LSLDGSPTR	9	0	944.493	F6PR90	F6PR90	351	359	yes	2	0.0003305	150.4	1	1	1	1	1	1	146090000	28855000	29337000	20755000	29546000	26153000	11447000
LSLEIK	6	0	701.432	F7BNQ2	F7BNQ2	579	584	yes	2	0.033955	119.22	1	1		1	1		184670000	10076000	6719100	0	7472800	160400000	0
LSLETSR	7	0	804.434	H9GZS6;H9GZR2	H9GZS6	301	307	yes	2	7.1572e-09	183.43	1	1	1	1	1	1	979740000	216580000	246280000	192510000	121590000	148680000	54103000
LSLSSQLGSLEK	12	0	1260.69	F6T592	F6T592	746	757	yes	2	0.062524	53.775	1	1	1	1	1	1	2445000000	508340000	733300000	5711500	602140000	537340000	58184000
LSNDMMGSYAEMK	13	0	1475.61	F6YCW8;F6YE73	F6YCW8	1696	1708	yes	2	0.010224	66.056	1	1	1	1	1	1	77123000	12006000	18757000	9121000	20856000	12422000	3960800
LSNENR	6	0	731.356	F7DL17;F7CTJ3;F7DAF6	F7DL17	465	470	yes	2	0.014048	148.4	1	1		1	1	1	1123800000	317230000	17033000	176840000	418660000	194020000	0
LSPEELLLR	9	0	1068.62	F6WA57;K9KEC7;F7AGA5;F7C0E6	F6WA57	265	273	yes	2	5.7927e-06	187.55		1		1	1	1	62010000	25261000	16354000	13590000	0	6805200	0
LSPEVYVFLPPEEDQSSK	18	0	2063.01	H9GZV0	H9GZV0	317	334	yes	2	9.3678e-10	128.46	1	1	1	1	1	1	125230000	21442000	22099000	29253000	19560000	21332000	11544000
LSPIYNLIPVK	11	0	1255.75	P48770;F6UFT2	P48770	473	483	yes	2	0.00213	134.77	1	1	1	1	1	1	333510000	71110000	50582000	55515000	53126000	69008000	34174000
LSSFQR	6	0	736.387	F6R3F4;F7AM84	F6R3F4	654	659	yes	2	0.04199	112.27	1	1	1	1	1	1	462010000	92455000	84012000	92507000	82300000	68140000	42600000
LSSGSVSETQNFEQNTDGTGQAIVPIAVR	29	0	3004.47	F6XSF7	F6XSF7	415	443	yes	3	7.6985e-18	112.13	1	1	1	1	1	1	662060000	144810000	139970000	86521000	105200000	105420000	80144000
LSTDIAGLASAIDIR	15	0	1514.83	F6YCW8;F6YE73	F6YCW8	1826	1840	yes	2;3	4.9746e-56	220.23	2	2	1	2	2	1	236010000	42442000	41952000	29501000	65935000	36305000	19880000
LSVETSR	7	0	790.418	H9GZU9	H9GZU9	288	294	yes	2	3.1895e-05	167.25	2	1	2	2	3	2	25427000000	3171600000	11363000000	3867100000	2325900000	2792500000	1907200000
LSVLDLSCNR	10	0	1175.6	Q5XWB8;F6VK89;Q9TTT3	Q5XWB8	295	304	yes	2	4.0232e-08	166.52	1	1	1	1	1	1	71518000	16290000	15018000	15811000	10691000	10890000	2817100
LSVLGGPTSAPSVSLFPPSSEELSANK	27	0	2670.38	A0A0A1E6P5	A0A0A1E6P5	127	153	yes	2;3	6.6972e-65	129.08	3	4	2	3	3	3	1239700000	228030000	285140000	196950000	152790000	174580000	202230000
LSVNTPNSQQPLTITVK	17	0	1839.01	F7BTW7;F7E454;F7CJG3	F7BTW7	407	423	yes	2;3	1.2645e-21	169.62	2	2	2	2	2	2	3172700000	732030000	695710000	503020000	535520000	509370000	197080000
LSYEGEVTK	9	0	1024.51	F7BKE1;B8K250	F7BKE1	319	327	yes	2	0.0004114	135	1	1	1	1	1	1	671540000	160120000	130340000	152770000	113940000	90559000	23813000
LSYICEDGFR	10	0	1258.57	F6UHF2;F6U1J0	F6UHF2	320	329	no	2	4.8419e-45	224.51	1	1	1	1	1	1	1314100000	419780000	329190000	136810000	263140000	133600000	31589000
LTGMERDLVAIEAKLSDLQK	20	2	2229.2	F6YIY1;F6X6S8;F6QHQ9;F6QHW7;F6TH64;F6V016;F6UM00	F6YIY1	980	999	yes	2;3	0.0029113	39.219	1	1	1	1	2	1	481470000	83130000	127800000	60739000	85090000	81375000	43334000
LTHTSLPPDMYECLR	15	0	1831.86	F6SKT2;B8K277;A2Q0Z2	F6SKT2	319	333	yes	3	0.002145	49.188	2	1	1	1	1	1	81761000	18006000	20014000	16196000	16082000	8948500	2513500
LTKEQLK	7	1	858.517	F6YDQ9	F6YDQ9	208	214	yes	2	0.0013134	163.34	1	1		1	1	1	552410000	134190000	53860000	119910000	144400000	100050000	0
LTNDILLEK	9	0	1057.6	F7B3I5	F7B3I5	89	97	yes	2	0.0003017	169.44	1	1	1	1	1	1	841520000	239690000	181120000	134520000	139150000	109980000	37057000
LTPLAEEMR	9	0	1058.54	F6Z2L5	F6Z2L5	164	172	yes	2	7.0454e-23	209.37	3	3	1	2	3	3	44433000000	8059700000	9662400000	7168200000	8252000000	7959800000	3330600000
LTPLYELVK	9	0	1074.63	F6Q7J3	F6Q7J3	420	428	yes	2	0.017	98.458	1	1		1	1	1	130740000	28481000	24414000	22411000	32594000	22841000	0
LTPYADELK	9	0	1048.54	F6RZ27	F6RZ27	201	209	yes	2	0.014321	101.72	1	1	1	1	1	1	811670000	113830000	257200000	132750000	164880000	110220000	32794000
LTQYDLVIK	9	0	1091.62	F6QX36	F6QX36	172	180	yes	2	0.0043944	117.04	1	1	1	1	1	1	798270000	166160000	175580000	132960000	145750000	131230000	46583000
LTTSNTDFAFHLYK	14	0	1656.81	F6ZLR1	F6ZLR1	52	65	yes	3	0.00012348	83.047	1	2	2	2	2	2	256800000	82732000	84810000	28905000	28845000	20190000	11321000
LTVETDR	7	0	832.429	H9GZU8	H9GZU8	287	293	yes	2	5.9261e-08	174.64	1	1		1	1	1	4170900000	455930000	986450000	532760000	1157300000	1038400000	0
LTVETDRWEQGESFTCVVMHEAIR	24	1	2892.35	H9GZU8	H9GZU8	287	310	yes	3;4	4.839e-80	219.07	8	7	13	11	3	9	3790500000	497760000	1043300000	916390000	264220000	354130000	714630000
LTVETNR	7	0	831.445	H9GZT5	H9GZT5	298	304	yes	2	0.0012357	153.88	1	1	1	1	1	1	6525300000	9407800	1669000000	1713800000	1584700000	1261300000	287180000
LTVGLTR	7	0	758.465	F7CN05;F7CN11;F7CS60	F7CN05	1028	1034	yes	2	0.0043299	143.02	1			1	1	1	128080000	42332000	32416000	47081000	6253200	0	0
LTYEEVLK	8	0	993.538	F6QX36	F6QX36	162	169	yes	2	0.054012	90.308	1	1	1	1	1	1	1219300000	212870000	226040000	218120000	233900000	225010000	103370000
LTYEEVLKR	9	1	1149.64	F6QX36	F6QX36	162	170	yes	2;3	0.00016036	157.34	2	2	1	2	2	2	261870000	68261000	92473000	31962000	24752000	33692000	10728000
LTYGQTLR	8	0	950.519	F6RMD0;K9KBR1	F6RMD0	586	593	yes	2	0.0037274	130.04	1	1			1		196730000	0	57667000	0	72704000	66355000	0
LTYGQTLRPICLPCTEGTNQALR	23	1	2661.34	F6RMD0;K9KBR1	F6RMD0	586	608	yes	2;3;4	1.4347e-35	163.18	2	2	1	3	3	3	5090700000	1397100000	1289400000	736470000	679050000	635450000	353240000
LVASSQLALA	10	0	971.565	F7BAY6;Q5XLE4;P35747	F7BAY6	598	607	no	2	0.0015125	114.78	5	3	1	4	5	1	49407000000	9384600000	10307000000	6886900000	9490900000	6574400000	6763100000
LVAYYTLINAK	11	0	1267.72	F7BLE3;F7BTW7;F7E454;F7CJG3	F7BTW7	529	539	no	2;3	0.0001089	164.96	1	1	1	1	1	2	3872800000	841710000	993350000	684650000	560730000	609860000	182520000
LVDGQCHISLSK	12	0	1355.69	F6XSF7	F6XSF7	311	322	yes	2;3	3.0206e-13	171.62	2	2		2	2	2	3321700000	451760000	561980000	689300000	715100000	903530000	0
LVDKDLNNFK	10	1	1204.65	F7AVY0;F7AE68	F7AVY0	507	516	yes	2;3	1.0996e-17	196.99	2	2	1	2	2	2	557210000	117610000	146470000	94494000	101020000	78260000	19353000
LVDKFQEDVK	10	1	1219.64	B5BV07;B5BV11;B5BV10;F7CSL8;F7CYP1	B5BV07	153	162	no	2;3	1.2814e-30	172.59	4	2	2	3	4	3	2393700000	396570000	696890000	373530000	347480000	509710000	69477000
LVECLEGNCAEGLGMNYR	18	0	2083.91	F7BFJ1	F7BFJ1	101	118	yes	2;3	1.0872e-28	172.92	3	3	3	3	3	3	765370000	145540000	234590000	120760000	128280000	107940000	28269000
LVENFCR	7	0	936.449	F7BFJ1	F7BFJ1	258	264	yes	2	2.6559e-05	168.06	1	1	1	1	1	1	2994200000	568200000	649850000	498340000	696390000	467820000	113610000
LVFQEGEPIHLR	12	0	1436.78	F6RI38;F6ZDP5;F6ZJN9;F7CR15	F6RI38	97	108	yes	2;3	0.00030477	118.28	1	1	1	2	2	2	179020000	52723000	58988000	31874000	9663000	21509000	4260300
LVLLNAVSLNAK	12	0	1253.77	F7CZW9	F7CZW9	263	274	yes	2	3.7793e-08	156.35	1	1		1	2	2	357110000	68937000	93833000	70633000	46392000	77318000	0
LVLPLLELPALHVPR	15	0	1679.05	F6YCW8;F6YE73;Q7YQQ6	F6YCW8	3252	3266	yes	3	5.5126e-06	95.651	1	1	1	1	1	1	66060000	14224000	11680000	11689000	8429700	10992000	9046000
LVLWGEHAGQLYSK	14	0	1599.84	F6YCW8;F6YE73	F6YCW8	1875	1888	yes	3	0.00018297	80.967	1	1		1	1	1	132360000	26758000	37544000	12175000	44574000	11307000	0
LVNEVTEFAK	10	0	1148.61	F7BAY6;Q5XLE4;P35747	F7BAY6	66	75	no	1;2	1.2302e-15	164.96	25	20	12	23	20	16	194150000000	41305000000	42436000000	19999000000	43829000000	31031000000	15545000000
LVNEVTEFAKK	11	1	1276.7	F7BAY6;Q5XLE4;P35747	F7BAY6	66	76	no	2;3	0.001559	115.86	4	4	4	4	4	4	893290000	155390000	165140000	177890000	173230000	174590000	47063000
LVNQEK	6	0	729.402	F7APU2;F7AU56	F7APU2	108	113	yes	2	0.021201	142.53	1	1	1	1	1	1	1904200000	444400000	251410000	364360000	425180000	330900000	87953000
LVPFATALHER	11	0	1252.69	F6RZ27	F6RZ27	80	90	yes	3	2.5474e-07	141.95	1	1		1	1	1	112050000	22759000	31858000	19541000	21148000	16749000	0
LVPLAEDVHGK	11	0	1176.65	F6RZ27	F6RZ27	267	277	yes	2;3	0.0029705	98.033	2	2	1	2	2	2	1500100000	279560000	257570000	256260000	395460000	270600000	40659000
LVPNPAQEDSNR	12	0	1338.65	F7E0P3	F7E0P3	656	667	yes	2	0.0021987	96.143	1	1		2	1	1	88170000	19439000	15491000	23398000	16584000	13258000	0
LVPNPDQK	8	0	909.492	F6YR34	F6YR34	912	919	yes	2	0.02619	105.39				1	1	1	101570000	24555000	32961000	44058000	0	0	0
LVPNPGQEDADR	12	0	1309.63	Q9BG80;F6U3D3;Q9N2C3	Q9BG80	484	495	yes	2	0.0089311	73.499	1		1		1	1	31446000	0	9166400	10307000	10063000	0	1910000
LWAFDAAQGK	10	0	1105.56	F6UZH0;P04365	F6UZH0	302	311	yes	2	4.925e-05	141.39	1	1	1	1	1	1	2350100000	478660000	445970000	500820000	438810000	338590000	147260000
LWGYHNCK	8	0	1076.49	F7BXD8	F7BXD8	313	320	yes	2;3	0.003767	129.96	3	2		2	3	2	411800000	54402000	100960000	129900000	26872000	99667000	0
LWWLDLK	7	0	972.543	F6X1I8	F6X1I8	380	386	yes	2	0.039927	107.66	1	1		1	1	1	274630000	68945000	53336000	58351000	50073000	43926000	0
LYDELLQSYQEK	12	0	1527.75	Q29482	Q29482	340	351	yes	2;3	6.5142e-12	195.36	3	2	2	3	2	2	2553400000	496690000	737800000	424490000	373500000	340750000	180150000
LYHAFSAVK	9	0	1034.55	F7CZW9	F7CZW9	129	137	yes	2	0.010043	105.14				1	1		13107000	0	13107000	0	0	0	0
LYSETGDVVEFACK	14	0	1616.74	F6UHF2;F6ZR63;F6U1J0	F6ZR63	1194	1207	no	2;3	7.8636e-06	138.25	2	2	2	3	2	2	1725600000	336860000	384970000	349600000	336230000	251330000	66597000
LYSETGDVVEFACKPGYR	18	1	2089.98	F6UHF2;F6ZR63;F6U1J0	F6ZR63	1194	1211	no	2;3	1.7957e-37	195.25	2	2	1	2	2	2	1026600000	329540000	301360000	159440000	104770000	116000000	15470000
LYYGDDEK	8	0	1001.43	F7CFN5	F7CFN5	159	166	yes	2	0.020348	111.01	3	2		1	2	2	151700000	33416000	28212000	20138000	42396000	27542000	0
LYYPSQDGDR	10	0	1212.54	F6PJI3	F6PJI3	83	92	yes	2	5.3155e-06	153.08	1	1		1	1	1	87639000	13806000	16626000	17099000	25966000	14141000	0
MDAHPPR	7	0	822.381	Q28372;F7DHZ1;F7E2D1;Q6X9X6	Q28372	611	617	yes	2	0.042944	104.11	1	1		1	1	1	475920000	36585000	251160000	88655000	63882000	35637000	0
MEKTKDVYLLYEGR	14	2	1743.89	F7DJS0	F7DJS0	128	141	yes	3	0.026507	48.527	1	1		1	1	1	73671000	26218000	2033000	11203000	22563000	11654000	0
MELETAGR	8	0	905.428	O97641;F6RUZ6	F6RUZ6	260	267	no	2	0.0013682	138.33				1		1	14829000	11038000	0	3791200	0	0	0
MERQLMAQEPLEK	13	1	1601.79	F6U101	F6U101	36	48	yes	2	0.016037	47.706			1		1	1	170440000	0	63637000	100390000	0	0	6406500
MFLGFPTTK	9	0	1040.54	P01959;P01958;Q28383	P01959	33	41	yes	2	0.0013973	127.02	1	1	1	1	1	1	560870000	138600000	88418000	119170000	71633000	128810000	14237000
MGIQDAFADNADFSR	15	0	1656.72	F6ZRF6	F6ZRF6	322	336	yes	2	0.0051371	62.924				1			8461400	8461400	0	0	0	0	0
MHAINGR	7	0	797.397	F6PQ46	F6PQ46	958	964	yes	2	0.013247	128.89	1	1		1	1	1	473930000	102970000	84197000	84980000	65617000	136160000	0
MIMELTMNK	9	0	1109.53	F7DBN1	F7DBN1	552	560	yes	3	0.027157	50.607			1				0	0	0	0	0	0	0
MLADSPPQDHSCCSGALYYGSK	22	0	2443.02	F7DL17;F7CTJ3;F7DAF6	F7DL17	639	660	yes	3	7.455e-06	89.483	1	1	1	1	1	1	326620000	85992000	117370000	30737000	48500000	36833000	7186000
MLELSSHVSR	10	0	1157.59	F6QAD8;F6R6K3;F6R7S3	F6QAD8	1393	1402	yes	2;3	3.4971e-10	138.4	2	2		3	2	2	173040000	68183000	64205000	15305000	25351000	0	0
MLITEENLMTIIIK	14	0	1660.91	F6U471;F6U418	F6U471	431	444	yes	2	0.028455	42.001	1	1		1	1	1	98002000	22819000	23268000	20323000	12916000	18676000	0
MNSLLGCHN	9	0	1044.45	F6X1I8	F6X1I8	454	462	yes	2	4.159e-06	166.96	1	2	1	1	1	1	5653600000	1213000000	1401400000	877740000	1196000000	860820000	104690000
MPPIIAHGSR	10	0	1077.58	F6YWC0	F6YWC0	4	13	yes	3	0.027368	55.401				1		1	14330000	4271900	0	10058000	0	0	0
MPYECGSSLDVCAR	14	0	1643.67	F6Q7J3	F6Q7J3	716	729	yes	2	0.0060692	99.215					1		0	0	0	0	0	0	0
MQSVLR	6	0	732.395	F6RZ27	F6RZ27	164	169	yes	2	0.031106	126.05	1				1	1	104910000	0	26269000	45495000	33142000	0	0
MRPSTDTLVVTVENSHGLR	19	1	2111.08	F6XSF7	F6XSF7	173	191	yes	3;4	3.4606e-16	148.15	3	2	2	2	3	3	296350000	37800000	120630000	56522000	48144000	28143000	5108700
MSFEER	6	0	797.338	F6ZLR1	F6ZLR1	247	252	yes	2	0.035872	117.56	1	1	1	1	1	1	123430000	20392000	26638000	24435000	25824000	24946000	1197600
MTEDPDLQVSAMQHQITLELMESGVEAAAATAVSVAR	37	0	3898.88	F7CZW9	F7CZW9	406	442	yes	4	1.9274e-11	66.097						1	80913000	0	0	80913000	0	0	0
MTGSGIYAPDSPR	13	0	1350.62	F6Z129	F6Z129	277	289	yes	2	2.5602e-09	157.97	1	2	1	1	1	2	147230000	35754000	32742000	21352000	21391000	29635000	6351800
MTMDSAGLLLLTSPDK	16	0	1691.85	F6R3F4	F6R3F4	838	853	yes	2	9.2826e-16	163.51	2	2	1	2	1	2	307510000	58328000	42306000	69896000	52367000	66572000	18041000
MVSGFVPLKPTVK	13	1	1401.81	F6RI47;F6R942	F6RI47	1388	1400	yes	2;3	0.00069034	114.83	5	4	5	4	4	5	7157700000	1776600000	1637900000	1229200000	1135000000	1061500000	317460000
MYYSAVDPTK	10	0	1173.54	F6PQ46	F6PQ46	537	546	yes	2	8.8697e-05	135.79	2	2	1	2	2	2	841550000	235250000	243580000	124300000	121890000	114660000	1869500
NACNGVNDCGDQSDELCCK	19	0	2214.8	F7APU2;F7AU56	F7APU2	215	233	yes	2;3	4.9613e-07	96.64	1				1		39841000	0	39841000	0	0	0	0
NACPPTSELLGSPDR	15	0	1612.75	Q9N2C4	Q9N2C4	52	66	yes	2;3	1.7486e-07	166.14	2	2		2	2	2	1386700000	418010000	404040000	173410000	255870000	135390000	0
NALFCLESAWK	11	0	1337.64	F6RI47;F6R942	F6RI47	1127	1137	yes	2;3	2.2598e-10	154.56	2	3	2	4	2	2	4841100000	10952000	1744000000	950000000	1118800000	0	1017300000
NALWHTGDTASQVR	14	0	1554.75	Q9BG80;F6U3D3	Q9BG80	650	663	yes	2	0.018523	56.359						1	7830300	0	0	7830300	0	0	0
NALWHTGNTPGQVR	14	0	1549.78	F6YR34	F6YR34	1078	1091	yes	2	0.0046144	68.069					1	1	25598000	0	11863000	13736000	0	0	0
NANFNFTELLK	11	0	1309.67	F6XWM5	F6XWM5	227	237	yes	2	0.0024139	115.13	1	1	1	1	1	1	177110000	33216000	45181000	19810000	34950000	30189000	13758000
NAPLDSNMVIFDEVITNQEGSYDSR	25	0	2813.28	F6TIN6;A0A3B0ITS7	F6TIN6	123	147	yes	3	2.7183e-07	94.301	1	1	1	1	1	1	130590000	27451000	20063000	24369000	22862000	18721000	17120000
NCDGIDVHR	9	0	1084.47	F6REX3	F6REX3	1360	1368	yes	2;3	0.0004114	144.12	3	3	3	4	3	4	822210000	169210000	196370000	154950000	118380000	143690000	39608000
NCDLFEEVGEYDFQNALIVR	20	0	2430.12	F7BAY6;Q5XLE4;P35747	F7BAY6	414	433	no	2;3;4	5.2538e-304	441.62	3	3	19	20	3	3	13433000000	2344800000	1861600000	1953200000	2294300000	3006500000	1972900000
NCELYATCSIK	11	0	1357.6	F6RFT9	F6RFT9	127	137	yes	2	0.043112	65.719		1	1	1	1	1	38445000	11302000	12787000	7619300	0	5598300	1137800
NCGLFR	6	0	765.359	F6XSF7	F6XSF7	102	107	yes	2	0.04865	107.73	1	1				1	226400000	0	0	72417000	70670000	83318000	0
NDCTGNEDHTYLILR	15	0	1819.82	F6YCW8;F6YE73;F6Z5E1	F6YCW8	435	449	yes	2;3	6.9275e-25	151.54	2	2	1	2	2	2	867070000	182990000	217440000	137270000	186080000	112920000	30365000
NDLGCGAGGGR	11	0	1032.44	F7D7B5	F7D7B5	602	612	yes	2	5.9092e-09	166.61	1	1	1	1	1	1	1790800000	455550000	523700000	307170000	312240000	140960000	51218000
NDLVSATTTQVADAK	15	0	1532.77	F7DL17;F7CTJ3;F7DAF6	F7DL17	360	374	yes	2;3	9.1363e-08	140.63	1	1	2	1	1	1	2938600000	889330000	626770000	345770000	643610000	283690000	149420000
NEALIALLR	9	0	1011.61	F6WA57;K9KEC7	F6WA57	246	254	yes	2	2.4467e-06	169.06	1	1		1	1	1	38232000	10120000	7233400	8912700	7064100	4902500	0
NECFLTHK	8	0	1047.48	F7BAY6;Q95MC2;Q5XLE4;P35747	F7BAY6	123	130	no	2;3	0.001425	150.05	6	6	3	9	9	8	102880000000	18727000000	18591000000	20639000000	21062000000	18075000000	5785200000
NECFLTHKDDHPNLPK	16	1	1963.92	F7BAY6;Q95MC2;Q5XLE4;P35747	F7BAY6	123	138	no	2;3;4;5	7.4964e-98	327.62	7	7	6	10	8	5	25671000000	4703900000	4382900000	5085000000	3598000000	5567400000	2333800000
NECHPLR	7	0	924.424	F6SR87	F6SR87	105	111	yes	2	0.043874	103.02	1	1		1	1	1	77283000	25458000	12329000	10520000	12366000	16612000	0
NEHTTQITTGGK	12	0	1285.63	F6Z352	F6Z352	339	350	yes	2;3	0.0027909	54.066	2	2		2	2	2	795450000	221580000	127150000	202240000	145410000	99068000	0
NEQVEIR	7	0	886.451	F7BLE3;F7BTW7;F7E454;F7CJG3	F7BTW7	841	847	no	2	7.9733e-05	160.03	1	1	1	2	2	2	2532800000	481290000	589210000	354190000	520060000	443930000	144120000
NEQVQQR	7	0	900.441	F6PJI3	F6PJI3	220	226	yes	2	0.005653	139.92					1		49265000	0	49265000	0	0	0	0
NEYSQDFNAYNTK	13	0	1592.67	F6YCW8;F6YE73	F6YCW8	1948	1960	yes	2	4.8879e-05	133.91	1	1		1	1	1	204830000	36689000	50867000	21022000	68275000	27977000	0
NFAAGIMAR	9	0	949.48	F6R3F4	F6R3F4	338	346	yes	2	9.8085e-06	160.03	1	1	1	1	1	1	900810000	183050000	197380000	187630000	149480000	145890000	37379000
NFDDAFLPVLK	11	0	1277.67	F7B7H8	F7B7H8	1272	1282	yes	2	0.03659	79.474	1	1	1	1		1	181430000	45343000	0	43189000	26655000	62114000	4125100
NFDNDIALVR	10	0	1175.59	F7BQD6	F7BQD6	531	540	yes	2	0.011472	90.135	1	1	1	1	1	1	220820000	51060000	71215000	27560000	36171000	23159000	11659000
NFGYTLR	7	0	869.44	F7BM31	F7BM31	210	216	yes	2	0.0059301	139.27	1	1	1	1	1	1	562190000	128790000	158020000	83543000	82241000	86819000	22781000
NFIGPADAAFR	11	0	1177.59	F6X1I8	F6X1I8	94	104	yes	2	3.7449e-13	182.29	1	1	1	2	2	1	7134500000	1479200000	1603900000	1046100000	1321800000	1195200000	488190000
NFPSVLR	7	0	831.46	H9GZN9	H9GZN9	56	62	yes	1;2	0.036928	116.3	2	2	1	2	2	2	15045000000	3495900000	3104200000	2655200000	3258100000	1860500000	670940000
NFSDDQLQEGK	11	0	1279.57	F6QXN5	F6QXN5	166	176	yes	2	0.014408	76.221	1			1	1	1	41703000	6497000	25471000	9734400	0	0	0
NGEIFSQR	8	0	949.462	F7BNQ2	F7BNQ2	380	387	yes	2	2.5254e-08	176.29	1	1	1	1	1	1	791230000	170570000	232840000	161170000	100630000	101300000	24719000
NGGETSEMYLIQPDR	15	0	1708.77	F6PH38	F6PH38	246	260	yes	2	2.9067e-05	97.214				1	1		16766000	16766000	0	0	0	0	0
NGIDIYSLTVDSK	13	0	1423.72	F6R3F4	F6R3F4	30	42	yes	2	2.3404e-05	136.02	1			1	1	1	144060000	35605000	40433000	33788000	34234000	0	0
NGMLHGEQISFFCK	14	0	1666.76	F6Z041	F6Z041	288	301	yes	2;3	1.4645e-87	259.18	3	3	2	3	3	3	1464500000	339680000	448630000	195350000	263690000	180710000	36398000
NGQWVALNPSR	11	0	1240.63	F6ZR63	F6ZR63	68	78	yes	2	4.9547e-05	143.03	1	1		1	1	1	708430000	214520000	177620000	105420000	132380000	78492000	0
NGSDCPDK	8	0	891.339	O97677	O97677	6	13	yes	2	0.023169	108.46	1			1	1		572850000	309400000	2243200	0	261210000	0	0
NGSDCPDKFCLFQSATK	17	1	1973.86	O97677	O97677	6	22	yes	2;3	2.018e-16	153.75	2	2	2	2	2	2	2336300000	578390000	543450000	327480000	510170000	304570000	72246000
NGVSCQK	7	0	791.36	F6USP9	F6USP9	126	132	yes	2	0.042018	105.2	1			1			106610000	43976000	0	0	62631000	0	0
NHLQLEGLFLTSGEHTSK	18	0	2010.02	F6YCW8;F6YE73;G5CW75	F6YCW8	3525	3542	yes	3;4	6.5626e-17	121.72	1	1	1	1	2	1	181620000	35056000	58898000	28700000	35292000	19202000	4467600
NHNTIGTR	8	0	911.457	F6PUW3	F6PUW3	1585	1592	yes	2	4.2041e-05	139.31	1	1		1	1	1	254540000	58459000	59933000	86717000	49430000	0	0
NIAHDNLMAMAQESGDYR	18	0	2034.89	F6XSF7	F6XSF7	1217	1234	yes	2;3	2.0566e-22	168.42	7	8	5	7	7	7	3551200000	805950000	1090100000	543970000	506330000	475690000	129220000
NIMHFPMYR	9	0	1207.56	Q29482	Q29482	228	236	yes	3	0.017225	69.825	2	1	2	2	1	1	111880000	28881000	17064000	7219200	31675000	23742000	3294200
NIQIMFPGSSHQPSK	15	0	1669.82	F7A8N4	F7A8N4	350	364	yes	3	0.023734	33.301		1				1	19180000	0	0	12095000	0	7085400	0
NKYEDEINK	9	1	1151.55	F6W7V0;F6XTV3;F6YKZ7;F6WKL7;F6XWG3	F6W7V0	255	263	yes	2	0.0093074	134.48	1						11304000	0	0	0	11304000	0	0
NLATMPTAPSGLQSGDR	17	0	1714.83	F6T7X3	F6T7X3	207	223	yes	2	6.8449e-05	89.548	1		1	1	1		13043000	8910300	0	0	0	0	4132400
NLDAMENAQAIKKK	14	2	1572.83	F6UGN9	F6UGN9	648	661	yes	2	0.022619	45.368					1		0	0	0	0	0	0	0
NLDENYCR	8	0	1082.45	F6USP9	F6USP9	324	331	yes	2	2.4923e-08	190.88	1	1	1	1	1	1	2243300000	907170000	382800000	414520000	238490000	220250000	80083000
NLDQASGSVLLYLEK	15	0	1648.87	F7DZE7;A0A3B0IP77	F7DZE7	188	202	yes	2	1.7048e-23	177.1	1	1	1	1	1	1	559140000	78011000	181380000	51846000	98718000	130380000	18810000
NLEVPCEEVSQK	12	0	1430.67	F6QAD8;F6R6K3;F6R7S3	F6QAD8	282	293	yes	2	0.0023028	133.76	1	1	1	1	1	1	811870000	143720000	199470000	118320000	153360000	146650000	50355000
NLHLLTTQGDYTLK	14	0	1615.86	F7DIN1	F7DIN1	163	176	yes	3	9.4872e-05	65.472				1	1		21594000	12993000	8601700	0	0	0	0
NLIEQTNEER	10	0	1244.6	Q29482	Q29482	57	66	yes	2	3.2613e-45	227.92	1	1	1	1	1	1	5731600000	1116100000	1174400000	1090300000	1136600000	1061800000	152490000
NLIEQTNEERK	11	1	1372.69	Q29482	Q29482	57	67	yes	2	0.00072064	95.573					1		0	0	0	0	0	0	0
NLLELSLPVFK	11	0	1271.75	F6YCW8;F6YE73;Q7YQQ6	F6YCW8	3267	3277	yes	2	0.0031511	105.4	1	1	1	1	1	1	158970000	29132000	38752000	27055000	28016000	15021000	20995000
NLLLNHIIK	9	0	1076.67	F6VB94;F6UMQ4	F6VB94	416	424	yes	3	0.026142	60.91	1	1		1	1	1	24926000	6648300	4829200	6349300	4833800	2265500	0
NLLTDLVTEK	10	0	1144.63	F6REX3	F6REX3	71	80	yes	2	8.5755e-05	136.21	1	1	1	1	1	1	2102900000	404260000	364700000	257000000	376860000	512220000	187860000
NLPATDPIQR	10	0	1123.6	F6QYS3	F6QYS3	329	338	yes	2	5.8045e-12	179.21	1	1	1	1	1	1	935660000	211400000	183740000	184310000	115950000	211610000	28642000
NLSPSLESCVPDR	13	0	1472.69	F7BFJ1	F7BFJ1	206	218	yes	2;3	1.818e-20	180.36	2	2	1	2	1	2	3310500000	458110000	657070000	706810000	577680000	669270000	241540000
NLYHSEAFSINFGDTEEAK	19	0	2170.98	B5BV07;B5BV11;B5BV10;F7DXM5	B5BV07	163	181	no	2;3	2.7806e-76	287.54	6	8	9	8	6	6	1069300000	228440000	154880000	199850000	198600000	134750000	152750000
NLYHSEAFSINFGDTEEAKK	20	1	2299.08	B5BV07;B5BV11;B5BV10;F7DXM5	B5BV07	163	182	no	2;3;4	5.9576e-22	154.26	11	13	12	15	23	16	1890900000	357720000	723320000	342430000	158930000	221620000	86898000
NMGEFCGTQR	10	0	1198.49	F6Z5L1	F6Z5L1	263	272	yes	2	6.0904e-12	178.94	1	1	1	1	1	1	201410000	37583000	29708000	39206000	52808000	33165000	8940000
NNANGVDLNR	10	0	1085.52	F6WZA8	F6WZA8	131	140	yes	2	5.3219e-06	153.08	1	1	1	1	1	1	64137000	13415000	15001000	9991600	12097000	10441000	3191400
NNEEWTVDSCTECR	14	0	1798.69	F6YR34	F6YR34	327	340	yes	2	0.00056353	112.15				1		1	23495000	9833700	0	13661000	0	0	0
NNVLIQTDQQATTRPQK	17	1	1954.02	H9GZV0	H9GZV0	358	374	yes	3	6.2293e-08	104.21	1		1				81476000	0	0	0	67754000	0	13722000
NPADLQR	7	0	812.414	F6T0M8;F6PVG3	F6T0M8	139	145	yes	2	0.04541	101.21	1			1		1	49218000	18018000	0	17668000	13532000	0	0
NPCQDPYVLTSENR	14	0	1691.76	F6T0M8;F6PVG3	F6T0M8	360	373	yes	2	0.00046879	98.156	1		1		1		81581000	0	43737000	0	30159000	0	7685800
NPCTDGTHDCNK	12	0	1417.54	F6YR34	F6YR34	648	659	yes	2;3	0.018832	66.321				1	1	2	172510000	31885000	32410000	108210000	0	0	0
NPDGDEEGVWCYVAGK	16	0	1794.75	F7BFJ1	F7BFJ1	265	280	yes	2;3	3.3857e-24	181.49	2	2	2	2	2	2	1715900000	414770000	412450000	340310000	152960000	149190000	246280000
NPDGDKGPWCYTTDPSVR	18	1	2063.9	F6USP9	F6USP9	434	451	yes	2;3	7.8535e-37	188.63	3	2	1	2	2	2	1969800000	439200000	465190000	294770000	364940000	320320000	85344000
NPDGDVNGPWCYTMNPQK	18	0	2091.88	F6USP9;P80010	F6USP9	540	557	yes	2;3	3.2207e-62	213.99	2	2	2	2	2	2	829550000	157680000	236050000	145300000	143330000	112680000	34498000
NPDGEPRPWCFTMDPDKR	18	2	2216.97	F6USP9	F6USP9	242	259	yes	2;3;4	1.0962e-08	90.793	2	2	2	3	3	3	2140200000	604330000	564860000	492280000	202510000	224590000	51572000
NPDGETAPWCYTTSSETR	18	0	2070.86	F6USP9	F6USP9	332	349	yes	2;3	1.0726e-107	257.02	3	3	2	3	3	3	2354000000	553010000	622110000	367570000	437330000	305700000	68268000
NPDGSSSGPWCYTTDPTVR	19	0	2095.89	F7BFJ1	F7BFJ1	160	178	yes	2;3	1.0001e-62	271	2	2	2	2	2	2	2002900000	459620000	423460000	359490000	319350000	354360000	86634000
NPDIHGTYK	9	0	1043.5	F7BKE1;B8K250	F7BKE1	115	123	yes	2	0.048574	91.069		1	1	1	1		42221000	12552000	16898000	0	0	9465600	3305900
NPDNDEKGPWCYTTDPGTR	19	1	2221.93	F6USP9	F6USP9	160	178	yes	2;3	3.6963e-08	139.74	2	2	1	2	2	2	1557000000	327040000	357980000	293810000	277610000	247580000	53028000
NPELNPCSVNAQCIEGR	17	0	1956.88	F7E0P3	F7E0P3	397	413	yes	2;3	1.5968e-05	83.314	1	1		2	2	1	46315000	16281000	11139000	5164300	7814700	5915900	0
NPFVFAPTLLTVATR	15	0	1645.92	F7B3I5	F7B3I5	170	184	yes	2	3.3255e-06	130.56	1	1		1	1	1	68454000	18616000	15467000	12870000	13115000	8386000	0
NPGELHNGQISK	12	0	1292.65	F7BNQ2	F7BNQ2	121	132	yes	2;3	7.5539e-13	189.52	2	2	2	2	2	1	1702900000	475760000	406960000	164140000	300510000	338540000	17027000
NPGNQAAYEHFETMK	15	0	1735.76	F6ZSZ5;F6ZT22;F6ZT60	F6ZSZ5	685	699	yes	3	0.0040489	47.545	1	1	1	1	1	1	46230000	8890000	8705800	11456000	8186800	7816300	1174700
NPGTSTTPGRPNPGGVQDTEMGPCR	25	1	2582.16	Q5IF03;F7DEB1	Q5IF03	22	46	yes	3	6.9363e-05	42.041	1				1		14952000	0	7643200	0	7308800	0	0
NPNPGAQQER	10	0	1109.52	F6X449	F6X449	435	444	yes	2	8.0168e-07	158.61		1		1	1		724580000	241450000	282680000	0	0	200460000	0
NPPPSEVLR	9	0	1007.54	F7DTV1	F7DTV1	298	306	yes	2	0.00016844	155	4	3	3	4	6	4	1051800000	203410000	286980000	137850000	295820000	112430000	15280000
NPQLQVR	7	0	853.477	F6R3F4	F6R3F4	800	806	yes	2	0.010265	132.01	1	1	1	1	1	1	924760000	171570000	164630000	168600000	133900000	210220000	75843000
NPSSPIVEEFQVPHNR	16	0	1848.91	F7BQD6	F7BQD6	96	111	yes	2;3	1.6231e-08	134.37	2	2	2	2	2	2	386890000	106370000	117920000	72940000	11842000	55465000	22347000
NPVDQVQR	8	0	954.488	F6XWM5	F6XWM5	94	101	yes	2	3.867e-05	160.03		1	1	1			267420000	0	0	0	0	0	267420000
NPVMYVGSTSVVTSALTHAQR	21	0	2217.12	F7BQD6	F7BQD6	488	508	yes	3	1.0529e-57	153.06	1	1		1	1	1	228520000	41152000	26986000	45747000	69163000	45473000	0
NPYGNNAPCSPK	12	0	1317.58	F6XSF7	F6XSF7	66	77	yes	2	5.4889e-40	210.64	2	1	1	1	2	2	1171900000	85041000	136580000	356560000	188890000	363610000	41268000
NPYLPPETVTYLK	13	0	1533.81	F6XM13	F6XM13	176	188	yes	2	0.0068851	74.841	4	1	1	3	2	1	424060000	94708000	85517000	46090000	109210000	58593000	29946000
NQDVHTINLPFSK	13	0	1511.77	F6YCW8;F6YE73	F6YCW8	2021	2033	yes	2;3	0.00021396	70.622	1	1	1		2	1	74185000	0	34867000	7801400	22462000	7398100	1655800
NQGIPEFYGDDIALVK	16	0	1777.89	F6PPQ0	F6PPQ0	545	560	yes	2	2.2383e-05	92.19	1	1		1	1	1	377700000	80028000	61123000	59879000	62857000	113810000	0
NQLTSNPENTVFDAK	15	0	1676.8	Q9N1V8;F6YG82	Q9N1V8	28	42	yes	2	3.5719e-05	87.184	1	1		1	1	1	37524000	10063000	6421500	6053400	11754000	3231900	0
NQVVIAAGR	9	0	926.53	F7A8N4	F7A8N4	814	822	yes	2	0.015429	100.37	1	1	1	1	1		58444000	14073000	7720800	0	17281000	15083000	4286600
NSAILMVDR	9	0	1017.53	F6PPQ0	F6PPQ0	269	277	yes	2	0.011304	105.4	1	1		1	1		130420000	33721000	28369000	0	44457000	23876000	0
NSEEFGAAMSK	11	0	1169.5	F6YCW8;F6YE73;F6Z5E1	F6YCW8	77	87	yes	2	1.7174e-06	147.4	1		1	1	1	1	147650000	27262000	41823000	38652000	30464000	0	9449800
NSGLTEEEVQHCIR	14	0	1670.77	F6YQL3	F6YQL3	388	401	yes	2;3	2.597e-21	149.26	2	2		2	2	2	298840000	78270000	54524000	48711000	63937000	53400000	0
NSLFDYQK	8	0	1013.48	F6RUZ6	F6RUZ6	91	98	yes	2	0.026329	105.25	1	1	1	1	1	1	55303000	28047000	10715000	3873800	8729100	2705900	1232300
NSLTCQHGGVWK	12	0	1385.65	F7BNQ2	F7BNQ2	98	109	yes	2;3	1.2972e-22	196.88	2	2	2	2	2	3	6702200000	1663300000	1989200000	1132200000	970220000	855380000	91917000
NSLWICSNEECPGECLVTGQSHFK	24	0	2851.24	F7BAT4;A0A061DBP6	F7BAT4	357	380	yes	3	2.558e-06	87.509	1		1	1	1	1	125960000	21042000	25649000	30500000	26406000	0	22362000
NSNFQLNQLQGK	12	0	1389.7	F6ZEH8;Q9TQV1;P27425	P27425	120	131	no	1;2;3	1.302e-33	199.03	6	6	4	6	6	6	24052000000	5623200000	4593100000	3918800000	4739200000	3411400000	1766600000
NSNMAGISGQR	11	0	1133.52	F7BM31	F7BM31	418	428	yes	2	3.0716e-59	244.55	1	1	1	1	1	1	2430500000	507760000	412160000	518490000	414660000	530450000	47010000
NSVEENPQPK	10	0	1140.54	F6Z5L1	F6Z5L1	151	160	yes	2	0.00033035	130.75	1	1	1	1	1	1	231710000	92436000	26497000	24619000	49779000	25130000	13250000
NSVNELSHNVESISQSSSSNFQYITALK	28	0	3082.48	F6PH38	F6PH38	124	151	yes	3	8.1805e-39	147.17				1			44381000	44381000	0	0	0	0	0
NTDPGYNCLPCPPR	14	0	1659.71	F6YR34	F6YR34	610	623	yes	2	0.0021225	81.338					1	1	20514000	0	11404000	9109100	0	0	0
NTEEEEGNEMAHEVEMIIK	19	0	2230.97	F6TDH5	F6TDH5	298	316	yes	3	4.8933e-10	88.264	1	1		1	1	1	182790000	35546000	51585000	30980000	30962000	33721000	0
NTESLVFIQTDK	12	0	1393.71	F6QAD8;F6R6K3;F6R7S3	F6QAD8	124	135	yes	2	2.9074e-16	172.88	1	1	1	1	2	1	546260000	103580000	145870000	89876000	85121000	78176000	43639000
NTFAEVTGLSPGVTYHFK	18	0	1966.98	F7CN05;F7CN11;F7CS60	F7CN05	958	975	yes	2;3	7.8411e-63	220.32		1	1	1	2	2	534050000	59435000	220600000	226510000	0	15485000	12028000
NTLIIYLDK	9	0	1091.62	F7BTW7;F7E454;F7CJG3	F7BTW7	1443	1451	yes	1;2	0.001607	125.47	3	3	2	5	6	4	1597300000	364910000	519530000	321410000	211760000	171520000	8203000
NTLTLSCDGSLHHK	14	0	1581.76	F6YCW8;F6YE73;F6Z5E1	F6YCW8	1375	1388	yes	2;3	8.8781e-05	106.29	2	1		1	2	1	219020000	23682000	47877000	14512000	102000000	30949000	0
NTMVDDLVVLVR	12	0	1372.74	F7AXF6	F7AXF6	419	430	yes	2	3.9958e-12	166.19	1	1	1	1	1	1	204200000	41044000	40676000	45393000	38835000	28003000	10248000
NTVSVTCLVK	10	0	1119.6	H9GZU8;H9GZU9	H9GZU8	236	245	no	1;2	0.0024153	107.69	4	4	3	4	9	5	38645000000	6104900000	14875000000	6597900000	6016100000	3176200000	1874300000
NVALVAGDTR	10	0	1014.55	F6QYS3	F6QYS3	510	519	yes	2	5.1558e-08	164.96	1	2	1	1	1	1	368900000	115620000	76053000	51586000	55445000	51644000	18553000
NVDGTAFVIFGVQDGDR	17	0	1808.87	F7BLE3;F7BTW7;F7E454;F7CJG3	F7BTW7	263	279	no	2	1.3982e-08	113.35	5	5	2	5	4	4	254830000	42529000	50420000	42153000	50850000	42045000	26832000
NVDGTAFVIFGVQDGDRR	18	1	1964.97	F7BLE3;F7BTW7;F7E454;F7CJG3	F7BTW7	263	280	no	3	2.3728e-09	117.37	2	2	3	1	1	2	186840000	14852000	29048000	61281000	20505000	28351000	32801000
NVIFVIDQSGSMAGR	15	0	1592.8	F6R3F4	F6R3F4	273	287	yes	2	1.5197e-32	191.53	2	5	2	7	8	6	317660000	61083000	99771000	53364000	1789500	64231000	37425000
NVLDSEFGVEQLK	13	0	1476.75	F6PJI3	F6PJI3	248	260	yes	2	3.2753e-28	185.33	1	1	1	1	1	1	196220000	40465000	38103000	25834000	53756000	25494000	12568000
NVMYFDGNSDASTIK	15	0	1660.74	F7DZ01	F7DZ01	1266	1280	yes	2	2.9198e-05	124.12	1	1		1	1	1	192090000	53697000	57863000	18873000	32903000	28752000	0
NVYINGIMYSPVSNTNEK	18	0	2041.98	F6RI47;F6R942	F6RI47	649	666	yes	2;3	2.1417e-49	245.92	3	3	3	5	4	5	6317000000	1662300000	1605600000	786960000	1024400000	815980000	421700000
NWETEITAQPDGGK	14	0	1544.71	F7AW05	F7AW05	156	169	yes	2;3	1.1523e-21	183.99	2	2	1	2	2	2	680310000	174990000	208870000	96881000	100590000	82143000	16838000
NWGLGDHAFCR	11	0	1331.58	F7DGR1	F7DGR1	257	267	yes	2	0.0031448	105.52				1	1		19562000	10829000	8732100	0	0	0	0
NWMNSLGVNPR	11	0	1286.62	F6WA57;K9KEC7	F6WA57	403	413	yes	2	3.5497e-10	171.73	1	1	1	1	1	1	53146000	15944000	12167000	10610000	6517600	6260400	1646000
NYLEGTCVEWLLR	13	0	1651.8	F7BSX5;F2VYZ0;D9MNN2;Q861K5;Q861M0;Q30485;H9GZU6;Q861M7;Q861J5;Q861L9;Q861J8;Q861J7;Q0R0C9;Q861K0	F7BSX5	182	194	no	2	8.6866e-29	194.06	2	2	1	2	2	1	339520000	55068000	98538000	47892000	47478000	65600000	24948000
NYNLVEALK	9	0	1062.57	F7BM31	F7BM31	399	407	yes	2	0.017331	114.99	1	1	1	1	1	1	812130000	201020000	179950000	135340000	109730000	136590000	49493000
NYVCHAR	7	0	918.413	F7ASE1;F7AWQ9	F7ASE1	333	339	yes	2	0.040691	106.76	1	1		1	1	1	157850000	13730000	35906000	36155000	44262000	27794000	0
NYVEGTCVEWLLR	13	0	1637.79	Q861L3	Q861L3	98	110	yes	2	3.7907e-09	157.24	1	1	1	1	1	1	169500000	55202000	22418000	19140000	22866000	6221400	43649000
PAFSAVR	7	0	746.408	F6TIN6;A0A3B0ITS7	F6TIN6	115	121	yes	2	0.0022288	149.06		1		1		1	265070000	55250000	0	102110000	0	107700000	0
PAGDGTFQK	9	0	919.44	F7BSX5;F2VYZ0;Q0R0D7;D9MNN5;F2VYZ1;Q860N8;Q30482;Q860N7;F2VYY8;Q861M0;Q861K3;Q0R0C0;B2X062;B2X055;F6XUF3;F2VYY0;F2VYY9;H9GZU6;F6XUA3;F2VYZ2;Q861L9;Q861J8;Q861J7;Q861M8;Q861L8;Q861L7;Q861L6;Q861L5;Q861L4;Q861J9;F6XA91;F7C2F9;B2X058;D9MNN6;F6RHP4;F7CUU6;Q9XRL2;Q9XRL1;Q9XRL3;Q861K6;Q0R0B7;F7E2N0;F7AH72;F6X323;Q9XRL4;Q861J3;F2VYX9;F7CU44;Q30481;C9K796;F7DB76;Q861M4;Q861M3;Q0R0D8;Q0R0D5;Q0R0D0;Q30487;…	F7BSX5	259	267	no	2	3.0079e-30	211.39	1	1	1	1	1	1	2169700000	465500000	165950000	398740000	651560000	454160000	33795000
PAMPFDLMVFVTNPDGSPAR	20	0	2161.03	F7BLE3;F7BTW7;F7E454;F7CJG3	F7BTW7	365	384	no	2;3	4.839e-36	242.4	3	3	2	3	2	3	480130000	94592000	165280000	69200000	59848000	72081000	19134000
PAQGIVTTLENVSPPR	16	0	1677.9	F7CN05;F7CN11;F7CS60;Q28377	F7CN05	1712	1727	yes	2;3	3.9693e-44	163.23	2	2	2	2	2	2	470570000	113040000	96316000	167570000	23360000	29622000	40668000
PASDKPTAVICQEDFR	16	1	1832.87	F7BNQ2	F7BNQ2	346	361	yes	2;3	7.3371e-68	233.37	2	2	1	2	2	2	2539200000	586280000	454030000	583450000	548430000	367040000	0
PASNMAIADVK	11	0	1115.56	F6RI47;F6R942	F6RI47	1377	1387	yes	2	1.7574e-12	173.64	3	3	3	3	3	4	17884000000	3247200000	3403200000	2999300000	3498100000	3739000000	997000000
PCFSALELDEGYVPK	15	0	1723.81	F7BAY6;P35747	F7BAY6	509	523	no	2	2.9535e-56	221.09	1	1	1	1		1	537310000	29964000	0	124030000	163880000	87349000	132080000
PEAELSPASVYSLLPVK	17	0	1798.97	F6RI47;F6R942	F6RI47	609	625	yes	2	0.0029949	73.881	1	1		1	1		78472000	24126000	15074000	0	19009000	20263000	0
PEETFEQAPVLNR	13	0	1528.75	F6V881	F6V881	103	115	yes	2	2.4415e-09	190.88	1	1	1		1	1	75760000	0	20303000	13496000	19373000	13296000	9291800
PFEPESTTEQDFHVDEK	17	0	2033.89	B5BV04;B5BV07;B5BV11;B5BV10;B5BV06;B5BV13;B5BV09;B5BV08;B5BV12;F7CSL8;F7CYP1;F7DXM5	B5BV07	224	240	no	2;3	7.9473e-06	84.035	2	2	1	3	3	2	818730000	259680000	156650000	116550000	169080000	81468000	35292000
PFEPEYTTEQDFHVDEK	17	0	2109.92	F7BF31	F7BF31	224	240	no	2;3	0.00046439	56.295	2	1	1	1	1	2	368810000	62190000	54328000	82908000	122540000	37344000	9491700
PFNFNTLLGEEWK	13	0	1593.78	F6Y950	F6Y950	173	185	yes	3	0.0016717	52.576	2	2	1	2	2	2	424560000	105970000	124340000	71361000	62837000	47669000	12383000
PFRSSVDMASFVK	13	1	1469.73	F7E2K1	F7E2K1	145	157	yes	2	0.026589	63.816				1	1		54863000	31201000	23662000	0	0	0	0
PGCYDNGK	8	0	909.365	F7CN05;F7CN11;F7CS60	F7CN05	49	56	yes	2	3.867e-05	160.03				1	1	1	55455000	10852000	15639000	28963000	0	0	0
PGGGFVPNFQLFEK	14	0	1535.78	F7DSB9;F7CPY6	F7DSB9	22	35	yes	2	1.1098e-05	164.66	1	1	1	1	1	1	707580000	147160000	136510000	120040000	173460000	130410000	0
PGGPPVTVIYK	11	0	1126.64	F6PNY0	F6PNY0	39	49	yes	2	5.7822e-26	204.7	1	2	1	2	2	2	1248300000	205590000	457870000	159440000	101220000	240510000	83657000
PGGTPVTVIYK	11	0	1130.63	A0A0A1E417	A0A0A1E417	58	68	yes	2	0.00013008	162.88	1	1	1	1	1	1	275520000	71575000	23499000	56043000	67280000	51656000	5470300
PGQAPVLLININNER	15	0	1646.91	A0A0A1E921	A0A0A1E921	58	72	no	2	3.2655e-05	91.313					1		14070000	0	14070000	0	0	0	0
PGQAPVLVIYANSERPSGIPER	22	1	2349.24	F6XGG1	F6XGG1	58	79	yes	3	0.00032233	76.027	1			1			39425000	19922000	0	0	19503000	0	0
PGQDSCQGDSGGPLTCEK	18	0	1891.77	F6VZ73	F6VZ73	463	480	yes	2;3	0.00038137	80.522	1	2		2	1	1	210670000	64147000	36453000	26866000	44366000	38840000	0
PGTAPK	6	0	569.317	A0A0A1E9D0	A0A0A1E9D0	58	63	no	1	0.0436	142.63	1	1		1	1	1	3120400000	737480000	743540000	577160000	523780000	538470000	0
PGVSLRPK	8	1	852.518	F6VJR6	F6VJR6	227	234	yes	2	0.00035284	167.24	1	1	1	1	1	1	1462100000	333910000	460950000	231070000	218430000	175650000	42034000
PHYMVLVPSLLHSEILEK	18	0	2104.14	F6RI47;F6R942	F6RI47	29	46	yes	2;3;4	5.1581e-22	142.91	7	4	2	6	4	5	2105500000	274950000	287870000	481290000	466160000	463120000	132080000
PIAFSDHVHPVCLPDK	16	0	1830.91	F7BFJ1	F7BFJ1	472	487	yes	4	0.046266	28.58	1	1	1	1		1	29947000	3782400	0	6562200	10684000	6592300	2326100
PICLPCTEGTNQALR	15	0	1728.83	F6RMD0;K9KBR1	F6RMD0	594	608	yes	2;3	2.5158e-06	147.37	2	2	2	2	2	2	521990000	125650000	82930000	95192000	106170000	80621000	31418000
PICLPSK	7	0	813.442	F6T3E4	F6T3E4	498	504	yes	1;2	3.0296e-34	205.13	3	2	1	2	3	1	103520000	0	48108000	18023000	0	28674000	8718400
PIDQYIFELSAR	12	0	1450.75	F6T0P6	F6T0P6	342	353	yes	2	4.2617e-65	242.35	2	2	1	2	2	2	958630000	190100000	172060000	160940000	217710000	149100000	68718000
PISIDYR	7	0	862.455	F7CN05;F7CN11;F7CS60	F7CN05	1532	1538	yes	2	0.061931	97.473				1			0	0	0	0	0	0	0
PIYKPGQTVK	10	1	1129.65	F6RI47;F6R942	F6RI47	136	145	yes	3	0.010724	83.869	1	1	1	1	1	1	2207300000	429750000	352010000	495440000	457880000	426020000	46248000
PLLVEPEGLEK	11	0	1222.68	F6RI47;F6R942	F6RI47	906	916	yes	2	1.4168e-05	145.9	1	1	1	1	1	1	2087700000	383890000	377850000	375970000	540410000	316700000	92929000
PLSPISTIQPK	11	0	1179.69	F6Y0C1	F6Y0C1	28	38	yes	2	0.0031115	106.18	1	1	1	1	1	1	315960000	75196000	56357000	50686000	73832000	49393000	10499000
PLSTLIGSSQSCQYTLESK	19	0	2098.03	F6YCW8;F6YE73;F6Z5E1	F6YCW8	193	211	yes	2	0.0018283	79.492	1	1		1	1	1	60825000	10625000	18394000	13921000	8617100	9268200	0
PLTGEQTTK	9	0	973.508	F7CN05;F7CN11;F7CS60	F7CN05	987	995	yes	2	0.031348	90.709				1	1	1	129960000	39480000	63282000	27200000	0	0	0
PMSLMGR	7	0	790.383	F6X449	F6X449	190	196	yes	2	7.3737e-06	170.96	1	1	1	1	1	1	216490000	40783000	38487000	30964000	49986000	44944000	11321000
PMSTGVSPLALIK	13	0	1312.74	F6YCW8;F6YE73;F6Z5E1	F6YCW8	176	188	yes	2	0.0041618	73.499	1			1	1		23444000	6949900	10110000	0	6384200	0	0
PNKPGVYVR	9	1	1028.58	F6USP9;P80010	F6USP9	794	802	yes	2	0.0096962	139.31	1	1	1	1	1	1	387730000	110730000	46014000	96311000	76628000	57544000	504970
PPGFSPFR	8	0	903.46	F7C0D9;F7C0Z0	F7C0D9	384	391	yes	2	2.8097e-15	197.16	1	1	1	1	1	1	456820000	87826000	112520000	83616000	59586000	84705000	28564000
PPSTWLTAYVVK	12	0	1360.74	F7BTW7;F7E454;F7CJG3	F7BTW7	1072	1083	no	2	3.1697e-05	142.83		1		1	1	1	40423000	11314000	6667300	11910000	0	10532000	0
PQAPITGYR	9	0	1001.53	F7CN05;F7CN11;F7CS60	F7CN05	833	841	yes	2	8.7657e-22	204.65	1	1	1	1	1	1	439800000	110550000	108940000	141370000	26147000	40914000	11881000
PQCPPYTGGPSVFIFPPNPK	20	0	2199.08	H9GZS6;H9GZR2	H9GZS6	118	137	yes	2;3	3.3399e-36	149.32	2	3		4	3	2	852690000	242730000	161000000	201920000	77446000	169600000	0
PQDFENGEYWPR	12	0	1536.66	F6RMD0	F6RMD0	106	117	yes	2	8.0049e-23	193.52	1	2	1	1	2	1	154960000	33221000	35004000	19072000	30243000	30758000	6665300
PQIEHGR	7	0	835.43	F7BNQ2	F7BNQ2	492	498	yes	2	0.0055675	140.12	1	1		1	1	1	2839400000	687010000	532050000	497190000	705160000	418050000	0
PQVDPVPHGTGSVPESPR	18	0	1854.92	O97641;F6RUZ6	F6RUZ6	271	288	no	3	0.00053267	54.974	1	1		1			18538000	5569100	0	0	5677600	7291300	0
PSDIVIGQCK	10	0	1115.56	F6ZI35	F6ZI35	95	104	yes	2	0.037077	74.486	1	1		1			15386000	8369400	0	0	5139600	1876700	0
PSGIPDR	7	0	740.382	A0A0A1E417;F6VKZ3	A0A0A1E417	73	79	yes	2	0.01277	129.39	1	1	1	1	1	1	1234800000	272200000	326980000	243700000	206420000	182270000	3194800
PSGIPER	7	0	754.397	F6XGG1	F6XGG1	73	79	no	2	0.007813	134.85	1	1	1	1	1	1	5760500000	1007500000	912140000	1159700000	1616500000	936800000	127920000
PSGVPDR	7	0	726.366	A0A0A1E439;A0A0A1E998;F6WXJ2;A0A0A1E6Q9	A0A0A1E6Q9	73	79	no	2	0.0063669	138.24	1	1	1	1	1	1	7124600000	1454400000	1025900000	1765900000	1572400000	826550000	479480000
PSLDQQR	7	0	842.425	F7AVY0;F7AE68	F7AVY0	228	234	yes	2	0.0047713	141.98	1	1			1	1	251410000	0	53429000	50604000	91950000	55424000	0
PSLVPASAENMK	12	0	1242.63	F6R3F4	F6R3F4	323	334	yes	2	0.0025856	104.42	1		1	1	1		51778000	21277000	15079000	0	12527000	0	2894800
PSPNNLDQICLPNR	14	0	1636.8	F6QYS3	F6QYS3	177	190	yes	2	0.00049208	87.298	1	1		1	1	1	71500000	14841000	10812000	16075000	21336000	8436000	0
PSQFHGEPCNFYDK	14	0	1724.73	F7AXF6	F7AXF6	94	107	yes	3	0.0041218	57.53	1	1	1	1	1	1	69382000	11459000	11909000	16144000	12537000	14668000	2664300
PSQFHGEPCNFYDKEVEDCVTNRPCR	26	2	3240.38	F7AXF6	F7AXF6	94	119	yes	4;5	1.0984e-06	61.109	2	2	2	2	2	2	236310000	84977000	51579000	43374000	33531000	17863000	4987800
PSSEEER	7	0	832.356	F7BXD8	F7BXD8	65	71	yes	2	0.041856	105.39		1			1	1	92016000	0	3792400	36321000	0	51903000	0
PSTDTLVVTVENSHGLR	17	0	1823.94	F6XSF7	F6XSF7	175	191	yes	3	0.0013599	53.631				1	1		36437000	21582000	14855000	0	0	0	0
PTCTEALAAVSK	12	0	1246.62	F6PSH3	F6PSH3	403	414	yes	2	0.0009945	110.66	1	1		1		1	31722000	0	0	8070900	15117000	8534400	0
PTLYNVSLVMSDMASTCY	18	0	2050.91	H9GZN9	H9GZN9	433	450	yes	3	4.7794e-06	94.461	1	1		1	1	1	18585000	5306600	4012100	2487800	4214700	2564100	0
PTVAQQR	7	0	798.435	F7DL17;F7CTJ3;F7DAF6	F7DL17	253	259	yes	2	7.3737e-06	170.96	1	1		1	1	1	761770000	153930000	139870000	162970000	160290000	144720000	0
PTVGQQQSCPTCSTSLLNGDFR	22	0	2452.11	F6QX36	F6QX36	236	257	yes	2;3	5.0155e-29	162.85	2	2	1	2	1	2	301300000	56711000	18083000	66133000	85814000	69126000	5435500
PVDPQWR	7	0	896.45	F7BM31	F7BM31	36	42	yes	2	0.0093681	132.94	1	1		1	1	1	66599000	15734000	12697000	8502700	17366000	12299000	0
PVESGFTTEEVQPQNK	16	0	1788.85	H9GZN9	H9GZN9	151	166	yes	2;3	7.2653e-06	151.79	2	2	2	2	2	2	930630000	217560000	153080000	161930000	244210000	113640000	40210000
PVLYNYLDK	9	0	1123.59	F6XSF7	F6XSF7	859	867	yes	2	0.036162	100.02	1	1	1	1	1	1	52528000	9538600	7329800	8821700	12220000	12719000	1899400
PVNPVEQK	8	0	909.492	F6Z5L1	F6Z5L1	454	461	yes	2	2.4132e-08	176.66	1	1	1	1	1	1	502380000	113010000	102710000	87277000	113060000	73182000	13143000
PVPGHVTMSICR	12	0	1352.67	F6QAD8;F6R6K3;F6R7S3	F6QAD8	259	270	yes	3	1.1487e-05	138.99	1	1	2	1	1	1	171040000	39163000	42235000	23065000	29547000	30993000	6036600
PVQGVAYVR	9	0	987.55	F6XSF7	F6XSF7	281	289	yes	2	0.0017593	124.34	1	1	1	1	1	1	334010000	75462000	82158000	48774000	65259000	49310000	13047000
PVSNMVIADVK	11	0	1171.63	F6QAD8;F6R6K3;F6R7S3	F6QAD8	1369	1379	yes	2	0.00064412	126.19	1	1	1	1	1	1	349560000	103150000	110500000	68804000	0	60984000	6120800
PVTPITHNQDVLGSSR	16	0	1719.89	F7A1L2	F7A1L2	231	246	yes	3	7.2436e-05	72.634	1	1	1	1	1	1	58874000	11937000	8598000	11795000	13974000	9942000	2628000
PVVAEFYGSK	10	0	1095.56	F6ZEH8;Q9TQR7;P27425	P27425	95	104	no	2	4.4638e-05	142.04	1	1	1	1	1	1	3261300000	802000000	671710000	474540000	752270000	460500000	100270000
PWCATTPSFEQDQR	14	0	1721.75	F7DGR1	F7DGR1	71	84	yes	2	0.00044503	100.48	1	1	1	1	1	1	108570000	19274000	15670000	16904000	19798000	21725000	15196000
PWCFTMDPDKR	11	1	1451.63	F6USP9	F6USP9	249	259	yes	2	0.0099118	94.692				1	1	1	36969000	11526000	12984000	12460000	0	0	0
PWQEDVADAEECAGR	15	0	1731.72	F7BK76	F7BK76	45	59	yes	2	3.7896e-06	130.01	1	1		1	1	1	35796000	6039000	8769600	9792000	7462200	3733400	0
PYPPNVNEEIQIGHVPR	17	0	1958	F7CN05;F7CN11;F7CS60;Q28377	F7CN05	1984	2000	yes	3	8.044e-11	132.84	1	1	1	1	1	1	228260000	46650000	66489000	85889000	12676000	13132000	3420000
PYSIHAHGVK	10	0	1107.58	F6PQ46	F6PQ46	831	840	yes	2;3	7.6336e-06	150.24	2	3	2	2	2	3	3149700000	715600000	764700000	504690000	772630000	363810000	28283000
PYTFHPHGVTYYK	13	0	1608.77	F6PQ46	F6PQ46	115	127	yes	2;4	0.00021363	93.111	2	2	2	3	2	3	518470000	134660000	133040000	87996000	101840000	54732000	6209800
QACPLIR	7	0	856.459	F7DU87;Q0PMN3	F7DU87	215	221	yes	2	0.025007	118.42	1	1		1	1	1	840640000	119160000	95277000	48708000	281550000	295950000	0
QADLSGITEEVPLTVSK	17	0	1785.94	B5BV04;B5BV07;B5BV06;B5BV13;F7BF31	B5BV07	342	358	no	2;3	1.2172e-28	231.36	3	3	3	3	3	3	41935000000	7743700000	7229600000	8396100000	8492900000	6343400000	3728900000
QAISRPDAVAK	11	1	1154.64	H9GZN9	H9GZN9	313	323	yes	2;3	2.6419e-57	236.32	4	4	2	5	5	4	16150000000	3017500000	4666700000	2780700000	3481400000	1904500000	299510000
QALEEFQK	8	0	991.497	F7AXF6	F7AXF6	493	500	yes	2	0.030188	101.33	1	1		1	1	1	215770000	44580000	53267000	48251000	38650000	31023000	0
QANMEER	7	0	876.376	Q28372;F7DHZ1;F7E2D1	Q28372	298	304	yes	2	1.6777e-08	181.81	1	1	1	1	1	1	3276400000	827630000	211540000	808240000	628780000	628060000	172110000
QAVNTAVDGVIIR	13	0	1354.76	F6QX36	F6QX36	42	54	yes	2;3	3.3431e-28	185.08	5	5	3	3	6	5	1503300000	275270000	297990000	241420000	350140000	244100000	94346000
QAYHTANHVFSLSK	14	0	1601.8	F6QAD8;F6R6K3;F6R7S3	F6QAD8	445	458	yes	3	0.013082	31.914	1	1		1	1	1	186420000	25329000	34392000	40405000	43773000	42520000	0
QCEDEELK	8	0	1049.43	F6Q7J3	F6Q7J3	543	550	yes	2	0.033661	97.798	1	1		1	1	1	444970000	111520000	127740000	83840000	71414000	50458000	0
QCGHQISACHQDIYK	15	0	1843.81	F6PR90	F6PR90	103	117	yes	3	0.036806	31.914	1	1		1	1	1	131940000	29789000	30978000	26672000	28857000	15648000	0
QCNNPAPQR	9	0	1083.49	F6YQL3	F6YQL3	588	596	yes	2	0.017703	97.602	1	1		1	1	1	109150000	21614000	13270000	23369000	30461000	20432000	0
QCSTSR	6	0	737.313	P27425	P27425	691	696	yes	2	0.035353	118.01		1	1				188040000	0	0	0	0	4331600	183710000
QCVPTEACEEVEDDCGNDFQCGTGR	25	0	2932.1	P48770;F6UFT2	P48770	87	111	yes	3	3.2676e-14	78.837				1			0	0	0	0	0	0	0
QDACQGDSGGVFAVR	15	0	1565.69	F6Z5L1	F6Z5L1	647	661	yes	2;3	6.4863e-08	176.78	2	1	1	1	1	1	474360000	119940000	98660000	71667000	95286000	70707000	18104000
QDGHLWCSTTSNYEQDQK	18	0	2195.92	F7CN05;F7CN11;F7CS60	F7CN05	379	396	yes	2;3	4.0549e-08	101.9		1		3	3	2	471820000	152900000	176040000	120840000	0	22034000	0
QDGSVDFGR	9	0	979.436	F6PH38	F6PH38	285	293	yes	2	0.0010419	129.65	1	1		1	1	1	111970000	63885000	12742000	8653700	21357000	5333200	0
QDGSYGAWLHR	11	0	1288.59	F6XSF7	F6XSF7	1068	1078	yes	2;3	6.8201e-05	141.52	2	2	2	2	2	2	1427500000	237160000	256780000	296960000	260310000	270220000	106080000
QDPDVIER	8	0	970.472	F6X1I8	F6X1I8	44	51	yes	2	0.00093043	147.34	1	1	1	1	1	1	8692500000	2132900000	2094700000	1234300000	2108300000	869450000	252840000
QDPPSVSVTSHVAPGK	16	0	1604.82	F7CAB8	F7CAB8	204	219	yes	2;3	2.5858e-06	125.54	2	1	2	1	2	1	1492000000	59214000	415780000	228790000	388110000	342910000	57189000
QDSISSK	7	0	763.371	F7B3I5	F7B3I5	292	298	yes	2	0.045348	101.28	1	1		1		1	323030000	70549000	0	65313000	123660000	63502000	0
QEELCLAR	8	0	1017.49	Q28369;F6W135	Q28369	174	181	yes	2	0.001663	134.12	2	2	1	1	1	1	437230000	39313000	57408000	40527000	82390000	122320000	95277000
QELNKDLELVK	11	1	1327.73	F6Z2L5	F6Z2L5	107	117	yes	2;3	0.0062566	145.9	2	2	2	2	2	2	1955900000	496680000	493770000	195290000	299580000	381190000	89378000
QELNNSLQLAEK	12	0	1385.72	Q29482	Q29482	325	336	yes	2	0.0022074	109.66	1	1	1	1	1	1	47777000	9505900	6408200	10441000	8963700	9960200	2498300
QELSGNTK	8	0	875.435	F6YCW8;F6YE73;Q7YQQ6	F6YCW8	3398	3405	yes	2	0.0011065	143.85	1	1		1	1		240120000	56969000	47495000	0	57892000	77765000	0
QEPERNECFLTHK	13	1	1686.78	F7BAY6;Q5XLE4;P35747	F7BAY6	118	130	no	2;3;4	2.8896e-58	223.07	4	3	4	5	4	3	59674000000	13101000000	17487000000	8254300000	7802900000	11544000000	1484800000
QEPERNECFLTHKDDHPNLPK	21	2	2603.22	F7BAY6;Q5XLE4;P35747	F7BAY6	118	138	no	3;4;5;6	3.0851e-99	237.14	7	9	8	7	8	10	7399800000	1089300000	1331200000	1491500000	954450000	1990000000	543270000
QEPGENSEIPLTLK	14	0	1553.79	Q9N2C4;F7DSB9	Q9N2C4	5	18	no	2	0.00011177	129.82	1	1	1	1	1	1	821830000	156750000	194060000	136170000	184230000	114770000	35850000
QESLELIK	8	0	958.534	F7BLE3;F7BTW7;F7E454;F7CJG3	F7BTW7	1042	1049	no	2	0.01631	114.5	1	1	1	1	1	1	1720500000	258140000	361520000	295760000	281490000	355680000	167930000
QEYDEAGPSIVHR	13	0	1499.7	F7CZ92;F7CW82;F6R1X9;K9K3B5;K7THJ6	F7CZ92	362	374	yes	2	0.0074292	81.865					1		13172000	0	13172000	0	0	0	0
QEYDESGPSIVHR	13	0	1515.7	F6T3Y8;F7A5E3;K9KF76;F7AAK7;P60708	P60708	360	372	no	2;3	1.6014e-28	191.4	2	2	2	2	1	2	616080000	236030000	40938000	123360000	130000000	68833000	16922000
QEYGHSEVVECVCHPGFLLK	20	0	2387.1	F6UHF2;F6ZR63;F7E3H8	F6ZR63	647	666	no	3;4	0.0003093	69.081	2	2	2	2	2	2	974980000	260650000	356780000	100640000	84785000	122160000	49972000
QFGQILNCNADVYLIPWEK	19	0	2307.14	F7C0D9;F7C0Z0	F7C0D9	346	364	yes	2;3	1.0379e-10	141.58	2	2		2	3	2	1027500000	242360000	222110000	173780000	170370000	218900000	0
QFPILDDFK	9	0	1121.58	F7BM31	F7BM31	226	234	yes	2	0.031377	106.91	1	1	1	1	1	1	208950000	34784000	36522000	29256000	34665000	49038000	24690000
QFTDSTFR	8	0	1000.46	F6PQ46	F6PQ46	786	793	yes	2	0.0011468	143	1	1	1	1	1	1	3632200000	758360000	946460000	563450000	631090000	553530000	179290000
QFVTATDVVR	10	0	1134.6	F6WA57;K9KEC7	F6WA57	349	358	yes	2	0.00028771	131.41	1	1	1	1	1	1	227340000	71536000	65570000	36880000	27806000	20949000	4597100
QFVTSSTTFNR	11	0	1286.63	O97641;F6RUZ6	F6RUZ6	512	522	no	2	1.2449e-08	160.59	1	1	1	1	1	1	507830000	132390000	116980000	97359000	73091000	67823000	20192000
QGESFTCGVMHEAVENHYTQK	21	0	2451.06	H9GZU9	H9GZU9	297	317	yes	2;3;4	1.2731e-27	207.64	19	22	17	16	26	20	44576000000	2953600000	10164000000	12736000000	8722700000	5727600000	4272100000
QGETLNLLETGYSR	14	0	1579.78	F6QYS3	F6QYS3	211	224	yes	2;3	9.6709e-21	179.19	2	2	2	2	2	2	396330000	115420000	121940000	7441900	86894000	60970000	3661100
QGFFPDSVSK	10	0	1110.53	F6YCW8;F6YE73;F6Z5E1	F6YCW8	667	676	yes	2	0.015523	85.716	1	1		1	1	1	311080000	61446000	77343000	59065000	63928000	49302000	0
QGFGNIATNADGK	13	0	1291.62	F6PH38	F6PH38	300	312	yes	2	0.0055308	91.752	1				1	1	46034000	0	9370400	20501000	16162000	0	0
QGLLPVLESLK	11	0	1195.72	F6Z2L5	F6Z2L5	239	249	yes	1;2;3	0.00069075	133.23	5	3	4	5	5	3	80544000000	14169000000	13626000000	10876000000	18738000000	14363000000	8771300000
QGQHFCGGSLVK	12	0	1316.63	F7BK76	F7BK76	502	513	yes	3	0.059745	22.321					1	1	20996000	0	4616700	16379000	0	0	0
QGYQLMEGK	9	0	1052.5	F6Z5L1	F6Z5L1	340	348	yes	2	0.028858	91.853	1	1	1	1	1	1	229070000	40419000	48585000	57528000	50328000	25253000	6953900
QHDMGHMMR	9	0	1141.46	F7CN05;F7CN11;F7CS60	F7CN05	486	494	yes	3	0.031881	56.729		1		1	1	1	144070000	44878000	62067000	34035000	0	3085700	0
QHGPNVCAVQK	11	0	1236.6	F6VB94	F6VB94	26	36	yes	2	0.043994	61.962				1	1	1	17159000	8424500	7403700	1331200	0	0	0
QHLEDVEQALSPSVFK	16	0	1825.92	F7CZW9	F7CZW9	341	356	yes	2;3	5.1855e-83	291.57	1	2	3	1	1	2	2711800000	410450000	368600000	616950000	297500000	597520000	420790000
QHLEGVLNFLPL	12	0	1378.76	F6PPQ0	F6PPQ0	734	745	yes	2	7.8203e-65	238.03	1	1	1	1	1	1	64765000	15538000	13927000	11088000	11238000	8161200	4812500
QHLPGQQMTLK	11	0	1279.67	F7BLE3;F7BTW7;F7E454;F7CJG3	F7BTW7	572	582	no	2;3	2.2718e-09	140.88	5	5	3	6	5	5	3707500000	1120400000	762580000	598020000	224810000	781770000	219940000
QHSDPCSLNPR	11	0	1309.58	F7BAT4;A0A061DBP6	F7BAT4	548	558	yes	3	0.00034206	91.549		1	1	1	1	2	50733000	0	11460000	28130000	0	8301100	2841800
QIQVFEDEPAR	11	0	1330.65	F7ASE1;F7AWQ9	F7ASE1	38	48	yes	2	3.2269e-09	169.09	1	1	1	1	1	1	208160000	40154000	40435000	38456000	38982000	35048000	15086000
QIYTPGQSVK	10	0	1119.59	F6QAD8;F6R6K3;F6R7S3	F6QAD8	136	145	yes	2	0.018312	93.467			1			1	42819000	0	0	2240800	0	0	40578000
QKDNGCFR	8	1	1023.46	F6RI47;F6R942	F6RI47	1078	1085	yes	2	0.017709	149.4	1	1		1	1	1	311970000	151990000	58982000	39662000	26229000	35104000	0
QKPDGVFQEDAPVITQQMTGGFQSAEEK	28	1	3064.44	F7BTW7;F7E454;F7CJG3	F7BTW7	1111	1138	yes	3;4	8.603e-55	183.1	1	1		2	2	1	955060000	196620000	228010000	218770000	21596000	290060000	0
QKPDGVFQEDGPVIHQEMIGGFR	23	1	2583.25	F7BLE3	F7BLE3	1113	1135	yes	2;3;4	4.2485e-25	145.69	4	3	4	4	4	4	6130100000	1470800000	1545400000	961200000	838490000	792460000	521690000
QKWEAEEVYVQR	12	1	1563.77	F7CAB8	F7CAB8	166	177	yes	2;3	0.0010845	140.75	2	2	2	3	3	2	546490000	157740000	166450000	56610000	69711000	73432000	22537000
QLATQIIK	8	0	913.56	F6QX36	F6QX36	215	222	yes	2	0.0074147	122.74	1	1		1	1	1	1765500000	498760000	446770000	208230000	360610000	251170000	0
QLCSLDNGDCDQFCSEER	18	0	2231.85	F6TDH5	F6TDH5	132	149	yes	2	1.5231e-07	104.17	1	1		2	1	1	80147000	13707000	14990000	19796000	15673000	15981000	0
QLEGLAFQMK	10	0	1163.6	F6RZ27	F6RZ27	237	246	yes	2	0.00036062	130.28	1	1	1	1	1	1	371030000	76244000	103130000	51923000	71926000	49158000	18654000
QLEQVIAR	8	0	955.545	O97641;F6RUZ6	F6RUZ6	204	211	no	2	0.0013725	138.24	1	1	1	2	1	1	83153000	40179000	11644000	10264000	12099000	6858600	2107600
QLGCGR	6	0	689.328	F7BXD8;F7BCV8;F7BDB0	F7BXD8	162	167	yes	1	0.016552	153.48	1	1		1	1	1	436220000	85865000	137490000	81711000	88674000	42484000	0
QLNCDDPETEQAALLAVDYINSHIHQGYK	29	0	3341.56	F7C450	F7C450	29	57	yes	3;4	1.1055e-105	225.27	4	4	6	5	3	3	18493000000	1134200000	997000000	783660000	4040200000	7719700000	3818000000
QLPESLNSYYR	11	0	1368.67	F6PQ46	F6PQ46	719	729	yes	2	2.7428e-16	151.44	1	1	1	2		1	107400000	0	0	37269000	58947000	0	11179000
QLPLEYGYGEYR	12	0	1486.71	F7AXF6	F7AXF6	325	336	yes	2	1.2679e-16	179.51	1	1	1	1	1	1	282900000	57050000	68141000	48306000	53035000	43502000	12862000
QLPTADLMQEWGDAVQYNPDIIK	23	0	2644.28	F7AXF6	F7AXF6	444	466	yes	2;3	7.3969e-14	120.92	2	2	1	2	2	2	341950000	50565000	94020000	82059000	50568000	45045000	19692000
QLQVPAHAR	9	0	1018.57	F6RMD0;K9KBR1	F6RMD0	735	743	yes	2	9.8085e-06	160.03	1	2	1	2	1	1	1040000000	251100000	179240000	191780000	199970000	204620000	13346000
QLSFSLSSEPIK	12	0	1334.71	F6QAD8;F6R6K3;F6R7S3	F6QAD8	189	200	yes	2	7.6929e-12	160.75	1	1	1	1	1	1	490200000	113270000	92121000	81851000	90054000	80754000	32153000
QLSPYAER	8	0	962.482	F6RZ27	F6RZ27	156	163	yes	2	0.021375	110.12	1			1	1	1	274530000	55856000	52143000	90177000	76355000	0	0
QLTFPLSSEPFQGSYK	16	0	1827.9	F6RI47;F6R942	F6RI47	189	204	yes	2;3	1.5797e-69	234.17	3	3	3	4	3	3	26497000000	5041200000	4484800000	4539300000	5125800000	4616000000	2690000000
QLTQHAVEGDCDVR	14	0	1626.74	F7C450	F7C450	103	116	yes	2;3	1.1837e-28	226.93	4	2	4	5	5	6	24081000000	4568200000	5900200000	3657300000	4721800000	3568500000	1664600000
QNEATLMFR	9	0	1108.53	F6YCW8;F6YE73	F6YCW8	1003	1011	yes	2	0.0004155	136.16	1	1	1	1	1	1	524360000	92524000	133080000	104140000	86255000	87865000	20493000
QNGQFSVSFVK	11	0	1239.62	F7C450	F7C450	120	130	yes	2	0.0034648	114.5	2	2	1	2	1	2	1839300000	393920000	415980000	278320000	354810000	296270000	99974000
QPFVQGLAPFAPITLPR	17	0	1851.04	F6W4R2	F6W4R2	222	238	yes	2;3	2.3439e-11	158.25	2	2	2	2	2	2	661950000	107070000	134960000	101550000	124250000	166280000	27830000
QPPGKPCPGSAYEQR	15	1	1670.78	F6SP74	F6SP74	231	245	yes	3	2.0418e-05	91.441	3	1	2	5	4	4	221490000	66159000	47558000	37663000	41501000	21880000	6726800
QPSSAYAAFLSR	12	0	1296.65	F7BTW7;F7E454;F7CJG3	F7BTW7	1060	1071	no	2	0.0022352	100.88	1	1	1	1	1	1	152670000	30740000	38373000	34946000	19434000	22036000	7143600
QPYSYDFPEDVAPALGTSLSHLLGATNPTQK	31	0	3316.63	F6PPQ0	F6PPQ0	200	230	yes	3	0.013716	27.112		1					12408000	0	0	0	0	12408000	0
QQNPNGGFSSTQDTVVALQALSK	23	0	2389.19	F6REX3	F6REX3	1249	1271	yes	2;3	1.1102e-05	115.8	2	2	2	2	2	1	209630000	40153000	42446000	14799000	39583000	45304000	27349000
QQNSQGGFSSTQDTVVALHALSK	23	0	2402.18	F6RI47;F6R942	F6RI47	1245	1267	yes	2;3;4	5.5311e-36	117.35	15	14	18	14	16	14	21045000000	5231000000	7394100000	2585700000	3283300000	1767400000	783980000
QQTHVLDVMQDSFDR	15	0	1817.84	Q29482	Q29482	167	181	yes	2;3	8.2297e-44	201.06	4	4	3	4	4	4	2224900000	420090000	565340000	307470000	308890000	505590000	117490000
QQTSDDLLSPR	11	0	1258.62	F6PSH3	F6PSH3	104	114	yes	2	4.9547e-05	143.03	1	1	1	1	1	1	275570000	71139000	53356000	46356000	57118000	36737000	10860000
QQVEMDLPGDK	11	0	1258.59	F6PUW3	F6PUW3	802	812	yes	2	0.012061	91.584	1	1	1		1	1	78039000	0	30285000	20618000	16689000	6586800	3859600
QSALAELVK	9	0	957.549	F7BAY6;Q5XLE4;P35747	F7BAY6	549	557	no	2	0.011304	105.4	3	3	3	3	3	3	68246000000	12506000000	12767000000	11739000000	12716000000	11938000000	6579400000
QSNGKYAASSYLTR	14	1	1544.76	A0A0A1E6J6;A0A0A1E6L0;A0A0A1E6I9;F7CAC5;A0A0A1E6Q9;A0A0A1E470;A0A0A1E6H5;A0A0A1E4N8;A0A0A1E3Z9;A0A0A1E447;A0A0A1E6J8;A0A0A1E6D7;A0A0A1E4T2;A0A0A1E4L2;A0A0A1E406;A0A0A1E966;A0A0A1E955;A0A0A1E6Q6;A0A0A1E6K4;A0A0A1E6E2;A0A0A1E6D2;A0A0A1E556;A0A0A1E532;A0A0A1E4R8;A0A0A1E483;A0A0A1E3Z2;A0A0A1E6H1;A0A0A1E6B2;A0A0A1E6H7;A0A0A1E3Y3;A0A0A1E3X7;A0A0A1E4S5;A0A0A1E938;A0A0A1E6K2;A0A0A1E6N5;A0A0A1E971;A0A0A1E…	A0A0A1E417	187	200	no	3	0.00037771	85.837	2	1		1			106920000	16273000	0	0	39036000	51614000	0
QSSGLYSLSSMVTVPASSLK	20	0	2041.04	H9GZU8	H9GZU8	58	77	yes	2;3	1.1876e-35	178.03	7	9	4	8	10	6	13443000000	3267100000	4176000000	1045000000	2305600000	2077400000	571950000
QSTNAYPDLR	10	0	1163.56	F6Z352	F6Z352	76	85	yes	2	0.0051372	98.033	1	1	1	1	1	1	74403000	13709000	21617000	11005000	17299000	8470000	2303500
QSVEADINGLR	11	0	1200.61	F6SJK9;F6SQQ0;F6WDW3;F6SS14;F6PJX6;F6ZEQ3	F6SJK9	136	146	yes	2	3.8301e-18	214.93	1			1			155610000	21468000	0	0	134140000	0	0
QTDQYPAANSLVK	13	0	1433.72	F7DBT2;A0A3B0ITF5	F7DBT2	127	139	yes	2	0.00015748	131.82	1	1	1	1	1	1	406440000	95620000	103940000	67376000	65840000	62341000	11320000
QTEQTYWQATPFR	13	0	1654.77	F7E0P3;F6S9T1	F7E0P3	786	798	yes	2	0.0010027	116.77	1	1	1	1	1	1	48432000	9575600	10976000	8015200	10395000	7687300	1783000
QTSPVSAMLVLVK	13	0	1371.78	F6T0M8;F6PVG3	F6T0M8	438	450	yes	2	0.0024641	96.015	1	1		1	1	1	68305000	16295000	17082000	13635000	11247000	10046000	0
QTTFGDMTGK	10	0	1084.49	F7A8N4	F7A8N4	766	775	yes	2	0.01551	85.731	1	1	1	1	1	1	80363000	16699000	20299000	13384000	18755000	9209300	2016300
QTVSWAVTPK	10	0	1115.6	F6RI47;F6R942	F6RI47	858	867	yes	2	0.0034521	104.01	1	1	1	2	3	2	22002000000	4736300000	4681900000	3481500000	3882500000	4378700000	841420000
QTVSWLVTPK	10	0	1157.64	F6QAD8;F6R6K3;F6R7S3	F6QAD8	849	858	yes	2	0.036117	85.731	1	1	1	1	1	1	603720000	167080000	148980000	80908000	89969000	85950000	30825000
QTYTVNQCK	9	0	1140.52	F6PQ46	F6PQ46	710	718	yes	2	0.01598	122.5	1	1	1	1		1	2780900000	627930000	0	857600000	508450000	646600000	140340000
QVDTVRPPYPR	11	1	1326.7	F6V881	F6V881	453	463	yes	2;3	2.6684e-24	199.46	2	2		4	3	2	913490000	222220000	174220000	144910000	183210000	188930000	0
QVLLYPEKDEPK	12	1	1457.78	F6YCW8;F6YE73;F6Z5E1	F6YCW8	99	110	yes	2;3	0.0034306	132.78	2	2	2	2	2	2	521810000	51881000	176600000	88898000	110300000	72826000	21305000
QVLSSEK	7	0	789.423	F7BLE3;F7BTW7;F7E454;F7CJG3	F7BTW7	67	73	no	2	0.042861	104.21	1	1	1	1	1	1	10714000000	2795800000	1930700000	2372000000	1888200000	1726800000	710080
QVPDTITEWK	10	0	1215.61	F6REX3	F6REX3	766	775	yes	2	0.0086007	93.267	2	1	1	1	1	2	1007600000	181410000	218070000	164380000	175940000	207230000	60581000
QVTQSYWDTNPTR	13	0	1594.74	F6YR34	F6YR34	1042	1054	yes	2	6.2268e-59	224.64				1	1	1	92506000	23315000	35480000	33711000	0	0	0
QYGFCK	6	0	801.348	F7C450	F7C450	225	230	yes	1	0.033356	146.66	1	1			1		989040000	0	372230000	0	420660000	196150000	0
QYNVGPSASQYPLR	14	0	1578.78	F7CN05;F7CN11;F7CS60	F7CN05	1040	1053	yes	2;3	1.2468e-14	162.36	1	2	2	2	2	2	846770000	274540000	237270000	219400000	44864000	50385000	20313000
QYYEGSEIVVAGR	13	0	1469.72	F6QX36	F6QX36	502	514	yes	2	1.8892e-08	148.32	4	5		7	5	6	1459400000	294010000	278700000	220960000	360550000	305150000	0
RANLLQAEVEELR	13	1	1539.84	F6SUC3	F6SUC3	1678	1690	yes	3	0.00048613	97.86					1		3681000	0	3681000	0	0	0	0
RASTSSCVYSSGEK	14	1	1517.68	F7BNQ2	F7BNQ2	389	402	yes	2;3	0.00021069	153.34	1	2		2	2	2	244010000	96928000	85162000	26943000	9853000	25124000	0
RDPQGEYEEHLGILGPVIR	19	1	2177.12	F7DZ01	F7DZ01	881	899	yes	4	0.018519	36.111		1		1			12462000	8985700	0	0	0	3476400	0
RDPQTHHYVVALVK	14	1	1661.9	F6PKE1	F6PKE1	94	107	yes	4	0.0012941	61.657		1		1	1	1	46535000	12494000	15225000	10658000	0	8157300	0
REDFDVEPADSEGHCADSLIFVSR	24	1	2750.22	F7BQD6	F7BQD6	226	249	yes	3;4	2.2275e-44	177.6	2	2	2	2	2	2	386290000	74844000	62136000	86272000	54860000	72864000	35316000
REDSKPVDPQWR	12	2	1511.75	F7BM31	F7BM31	31	42	yes	3	0.0020672	114.24	1	1			1	1	177360000	0	28401000	41408000	20175000	87372000	0
REISMLK	7	1	875.49	F7C0D9;F7C0Z0	F7C0D9	376	382	yes	2	0.054543	58.917	1	1	1			1	80283000	0	0	17193000	24785000	28175000	10130000
RENDDFASFR	10	1	1255.56	F6ZI35	F6ZI35	165	174	yes	2;3	8.512e-58	242.49	3	2	1	2	2	1	257900000	77641000	95333000	13394000	58783000	11366000	1387300
REQPGVYTK	9	1	1076.56	F6PR90	F6PR90	605	613	yes	2	0.03531	101.54	1		1		1		22050000	0	9532700	0	10059000	0	2457700
RFTCPLTGR	9	1	1106.57	F6Z041	F6Z041	63	71	yes	2;3	0.00020578	124.81	1	1	1	1	1	1	318590000	57433000	57829000	74668000	53756000	58992000	15912000
RGDACEGDSGGPFVMK	16	1	1681.72	F7BFJ1	F7BFJ1	561	576	yes	3	2.1899e-06	91.932	1	1	1	1	2	1	364900000	57293000	69493000	37733000	105430000	81195000	13754000
RGDVECQR	8	1	1018.46	F6YQL3	F6YQL3	694	701	yes	2	8.6349e-09	183.47	1	1		1	1	1	324880000	74454000	59433000	58937000	62360000	69694000	0
RGECIIYSNK	10	1	1238.61	F7B3I5	F7B3I5	310	319	yes	2	1.8908e-05	158.76	1	1	1	1	1	1	341620000	78503000	85310000	49259000	68789000	52421000	7336700
RGEQELLVPMSSAYPDR	17	1	1946.95	F6VJR6	F6VJR6	248	264	yes	2;3	5.1539e-21	167.98	4	5	4	4	5	4	10301000000	2508300000	2678000000	1717700000	1723400000	1303300000	370250000
RGHLFLQTDQPIYNPGQR	18	1	2139.1	F6XSF7	F6XSF7	144	161	yes	3	0.0005654	58.09	1				1	1	26939000	0	11068000	9034100	6836500	0	0
RHPDYSVSLLLR	12	1	1454.8	F7BAY6;Q5XLE4;P35747	F7BAY6	360	371	no	2;3;4	7.1329e-150	304.69	30	36	32	33	35	40	4331600000	603870000	1015600000	1129100000	605080000	632730000	345280000
RHPELSTPELLR	12	1	1446.79	F7B3I5	F7B3I5	361	372	yes	2;3	0.00011922	109.96	1	3	1	2	2	1	270310000	76901000	53835000	30476000	60538000	34992000	13570000
RHPYFYGPELLFHAEEYK	18	1	2295.11	F7BAY6;Q5XLE4;P35747	F7BAY6	168	185	no	2;3;4;5	2.1772e-29	181.86	13	15	13	8	11	14	5733300000	92073000	358070000	1714200000	1533500000	1359700000	675770000
RIEEEVAK	8	1	972.524	F7D7B5	F7D7B5	654	661	yes	2	0.014102	125.98	1	1		1	1	1	503810000	138470000	76136000	90216000	95916000	103080000	0
RIPVVTQGSNVQSLTQDDGVAK	22	1	2311.21	F7BLE3;F7BTW7;F7E454;F7CJG3	F7BTW7	385	406	no	2;3;4	1.3729e-84	267.22	6	4	5	5	4	6	15038000000	2875700000	6410600000	1665400000	2084500000	1398800000	602790000
RIYLSECK	8	1	1067.54	F6USP9	F6USP9	103	110	yes	2	0.0046066	133.68				1	1	1	81929000	32220000	35999000	13710000	0	0	0
RNPADLQR	8	1	968.515	F6T0M8;F6PVG3	F6T0M8	138	145	yes	2	9.0867e-13	160.63	1				1		41067000	0	41067000	0	0	0	0
RPCFEGLEADK	11	1	1320.61	F7B3I5	F7B3I5	507	517	yes	2;3	9.1907e-35	217.02	2	2	1	2	3	2	607110000	189400000	151350000	95378000	81846000	81518000	7617600
RPCFSALELDEGYVPK	16	1	1879.91	F7BAY6;P35747	F7BAY6	508	523	no	2;3;4	1.7043e-55	216.06	12	16	11	16	16	17	45377000000	6481500000	8213200000	7829600000	8072700000	7941200000	6838700000
RPCFSALELDEGYVPKEFK	19	2	2284.12	F7BAY6;P35747	F7BAY6	508	526	no	3;4	1.6462e-09	117.84	1	1	2	2		2	215580000	75033000	0	52263000	27299000	19706000	41273000
RPCLHVPACKDPEE	14	2	1706.79	F6SP74	F6SP74	452	465	yes	4	0.039611	33.685	1	1	1				29104000	0	0	0	16146000	10270000	2688100
RPGAEPGHEGSTGHSYNQYSQR	22	1	2414.07	F7CN05;F7CN11;F7CS60;O46557	F7CN05	2244	2265	yes	3;4	1.1091e-18	109.37	1	1	1	2	4	2	654560000	98486000	287770000	185160000	23539000	49278000	10329000
RPIAFSDHVHPVCLPDK	17	1	1987.01	F7BFJ1	F7BFJ1	471	487	yes	3;4;5	2.2723e-12	110.12	2	3	4	2	2	3	730440000	157990000	169760000	69856000	186780000	107200000	38851000
RPIAFSDHVHPVCLPDKETTTR	22	2	2575.3	F7BFJ1	F7BFJ1	471	492	yes	3;4;5;6	4.9632e-29	162.43	4	5	4	5	5	3	2018500000	803980000	460100000	236210000	307740000	164980000	45535000
RPPGFSPFR	9	1	1059.56	F7C0D9;F7C0Z0	F7C0D9	383	391	yes	2;3	0.00063833	128.12	2	2	1	1	3	3	155120000	10334000	32224000	32399000	45394000	34348000	422080
RPSDIVIGQCK	11	1	1271.67	F6ZI35	F6ZI35	94	104	yes	2;3	6.5303e-87	268.69	2	2	2	2	2	2	13140000000	1988100000	1390400000	3596200000	2287500000	3033800000	844250000
RPSGVPDR	8	1	882.467	A0A0A1E439;A0A0A1E998;A0A0A1E6Q9	A0A0A1E6Q9	72	79	no	1;2	0.0034555	125.82	2	3	1	4	3	2	53516000000	12148000000	15574000000	8029200000	10324000000	6111700000	1329500000
RQEELCLAR	9	1	1173.59	Q28369;F6W135	Q28369	173	181	yes	2;3	4.1685e-14	187.22	1	2		2	3	2	957000000	102020000	81090000	293920000	219390000	260570000	0
RQESLELIK	9	1	1114.63	F7BLE3;F7BTW7;F7E454;F7CJG3	F7BTW7	1041	1049	no	2;3	0.00019264	151.44	4	1	1	5	5	4	3485900000	1190200000	1109900000	295960000	554840000	245970000	89156000
RSDFASK	7	1	809.403	F6T0P6	F6T0P6	445	451	yes	2	0.0064553	147.04	1	1	1	1	1	1	3442100000	325210000	513140000	750910000	597720000	1077600000	177550000
RSDGSVDFFR	10	1	1184.56	F6QQT6	F6QQT6	48	57	no	2	0.0030773	117.7				1			10125000	10125000	0	0	0	0	0
RSELLESLDK	10	1	1188.63	F6REX3	F6REX3	1171	1180	yes	2;3	1.5553e-05	172.88	2	2		2	2	2	737960000	137270000	179580000	133840000	110250000	177030000	0
RSELLESLDKEAVK	14	2	1615.88	F6REX3	F6REX3	1171	1184	yes	3	0.0017766	70.451		1					9366500	0	0	0	0	9366500	0
RTSYLECIK	9	1	1168.59	F6PKE1;F6ZEH8;Q9TQV7;P27425	P27425	58	66	no	2	0.001021	152.06	1	1		1	1	1	1347500000	365790000	434990000	175220000	236870000	134680000	0
RVAEGTQVIELPFK	14	1	1585.88	F7CYR1	F7CYR1	295	308	yes	2;3	0.00020358	103.22	2	2	2	2	2	2	393680000	48307000	77974000	32783000	98477000	109420000	26723000
RVEPYGETFSK	11	1	1311.65	F6RZ27	F6RZ27	306	316	yes	2;3	0.0036949	138.71	2	4	2	2	2	2	546040000	109750000	167310000	75160000	134290000	38120000	21415000
RVSGVPDR	8	1	884.483	A0A0A1E464	A0A0A1E464	75	82	yes	2	0.036371	115.71	1	1		1			163360000	75336000	0	0	32854000	55170000	0
RVWELSK	7	1	916.513	F7CYR1	F7CYR1	80	86	yes	2	4.545e-05	169.26	1	1		1	1	1	3081000000	511170000	456950000	621200000	552560000	939120000	0
RYIDTDPAHR	10	1	1242.61	Q28372;F7DHZ1;F7E2D1;Q6X9X6	Q28372	678	687	yes	2;3	0.0016621	87.639	2	2		2	2	2	181080000	41725000	40883000	43964000	27419000	27094000	0
SAAGTEGNVLR	11	0	1073.55	F6Q7J3	F6Q7J3	361	371	yes	2	3.3602e-13	182.53	1	1	1	1	1	1	488080000	84712000	141030000	67708000	100250000	84168000	10211000
SADTLWDIQK	10	0	1175.58	C6L1J5	C6L1J5	319	328	yes	2	0.03427	75.825	1	1		1	1		45220000	15954000	14928000	0	11252000	3085800	0
SAFQEALNSAGEK	13	0	1350.64	F7ALV0;O97508	F7ALV0	1	13	yes	2	1.5793e-08	150.15		1		1	1	1	189060000	78734000	57373000	33754000	0	19195000	0
SAFSVGLETR	10	0	1065.55	F7DZE7;A0A3B0IP77	F7DZE7	108	117	yes	2	0.0034003	104.2	1	2		1	1		39807000	0	18883000	0	14168000	6755500	0
SAGWNIPIGLLYWQLPEPR	19	0	2209.17	F6ZEH8;Q9TQV1;P27425	P27425	141	159	no	2;3	0.00027743	66.874			2				17268000	0	0	0	0	0	17268000
SAPTDEHGR	9	0	968.431	F6SR87	F6SR87	358	366	yes	2	0.00042796	139.68	1	1		1	1	1	222410000	38428000	33192000	40895000	58077000	51814000	0
SAVEEMEAEEAAAK	14	0	1463.64	F6WE78	F6WE78	42	55	yes	2	0.0035487	69.721	1	1		1	1	1	39662000	11121000	8488900	10784000	4176700	5091000	0
SCALSNLACIR	11	0	1263.61	F6T3E4	F6T3E4	192	202	yes	2	0.002847	99.802	1	1		1		1	0	0	0	0	0	0	0
SCAVAEYGVYVK	12	0	1344.64	F6XWM5	F6XWM5	320	331	yes	1;2;3	2.3778e-23	215.06	39	27	30	30	26	39	13234000000	2665300000	3306700000	2084600000	2032300000	1555900000	1589400000
SCDLALLETYCATPAK	16	0	1811.84	Q9XS88;Q5Q0X5;F6S666;W8VNM5;P51459	Q9XS88	19	34	yes	2	5.5137e-08	138.94	1		1	1	1	1	59827000	14141000	11597000	15222000	9531000	0	9336000
SCDSLNNR	8	0	964.403	F6YR34	F6YR34	405	412	yes	2	0.0040544	129.39		1		1	1	1	192590000	37361000	70344000	79093000	0	5790400	0
SCEAVPVCLPLNLDK	15	0	1713.84	F6Z352	F6Z352	255	269	yes	2	0.00034573	103.43	1	1	1	1	1	1	295600000	39935000	50420000	53652000	49679000	64781000	37132000
SCEPAVPFPCGK	12	0	1347.6	F6RFT9	F6RFT9	169	180	yes	2	0.018639	66.435		1		1	1	1	68461000	16660000	16192000	19601000	0	16008000	0
SCESDSPFPVHPGTPECCTK	20	0	2290.93	F6T0P6	F6T0P6	95	114	yes	2;3	1.3655e-84	272.09	4	4	3	3	3	4	11012000000	1551200000	1983300000	2143700000	2040800000	2615600000	677350000
SCGLPNVENGR	11	0	1201.55	F7C7J6	F7C7J6	24	34	yes	2	0.0044284	93.178		1	1	1		1	11983000	0	0	0	0	10158000	1825000
SCGPPPQLPNGEVK	14	0	1478.72	F6UHF2;F6ZR63;F7E3H8	F6ZR63	629	642	no	2	0.00044953	113.22	2	1	1	1	1	1	194450000	39167000	41606000	25920000	54813000	24889000	8052400
SCHTGLGR	8	0	886.408	F6PKE1;F6ZEH8;Q9TQV1;P27425	P27425	133	140	no	2	3.4006e-13	191.44	1	1	1	1	1	1	25020000000	4136400000	4903700000	3946400000	5843900000	4421100000	1768900000
SCHTGVDR	8	0	930.398	F6ZEH8;Q9TQW7;P27425;Q9TQW8	P27425	473	480	no	2	0.001402	137.62	1		1	1	1	2	12816000000	2869600000	1033700000	1791300000	3688200000	0	3433200000
SCIGETSESR	10	0	1124.48	F6Q7J3	F6Q7J3	533	542	yes	2	8.593e-12	176.6	1	1		1	1	1	861530000	150770000	207290000	175740000	138720000	189010000	0
SCISTEPFPCGK	12	0	1381.6	F6TDH5	F6TDH5	168	179	yes	2	0.0026773	89.08	1	1	1	1	1	1	207270000	41959000	39746000	33404000	50029000	30850000	11286000
SCLLLR	6	0	760.427	F6QAD8;F6R6K3;F6R7S3;F6TGA5;F6ZPC6	F6QAD8	47	52	yes	2	0.035899	117.54	1	1	1	1	1	1	579680000	129160000	138020000	93695000	118680000	72296000	27828000
SCVDVNECDMGAPCEQR	17	0	2025.76	F6T962	F6T962	200	216	yes	2	0.00041717	64.55				1	1	1	17646000	8628500	5507800	3509600	0	0	0
SCVNAIPDQCNPLPCK	16	0	1871.83	F6Z352	F6Z352	86	101	yes	2	0.0093348	54.471	1	1		1	1	1	111230000	25908000	29200000	17492000	17981000	20652000	0
SDACQGDSGGPLACEK	16	0	1650.66	F6ZEJ2	F6ZEJ2	447	462	yes	2	0.0012757	64.878				1		1	0	0	0	0	0	0	0
SDFSNEER	8	0	982.399	F6RPL1;F7BQD6	F7BQD6	118	125	no	2	8.5631e-09	181.81	1	1	1	1	1	1	564720000	133860000	121240000	81749000	118750000	88859000	20257000
SDLDEDIIPEEDIISR	16	0	1857.88	F7BTW7;F7E454;F7CJG3	F7BTW7	748	763	yes	2;3	5.5605e-83	246.26	2	2	1	2	2	2	7454600000	997940000	950510000	1650500000	1624100000	1498400000	733090000
SDLEVAHYK	9	0	1060.52	F7AXF6	F7AXF6	299	307	yes	2;3	0.037805	83.206	1	2	2	1	2	2	282960000	38468000	52624000	81641000	38219000	61338000	10672000
SDLSFSK	7	0	782.381	Q861S3;Q6X9X1;P30441;K9K497	Q861S3	71	77	yes	2	0.01761	124.34	1	1	1	1	1	1	2430400000	564390000	433070000	517690000	386560000	474070000	54610000
SDLYVSDAFHK	11	0	1280.6	F7CYR1	F7CYR1	393	403	yes	2;3	0.00094504	118.18	3	3	3	2	3	3	11592000000	2604700000	2326200000	1623800000	3061500000	1670400000	305780000
SDTSSNHAVLK	11	0	1157.57	A0A3B0J2D1;F7A737	A0A3B0J2D1	201	211	yes	2	0.0030298	107.79	1			1	1	1	47552000	9484600	16505000	8421500	13141000	0	0
SDVGFLPPLPTLDLEEK	17	0	1868.98	F7B3I5	F7B3I5	131	147	yes	2	0.00019753	94.747	1	1	1	1	1	1	450810000	91204000	51163000	73806000	90006000	80076000	64558000
SEDCFILDHGK	11	0	1319.58	Q28372;F7DHZ1;F7E2D1	Q28372	277	287	yes	2;3	3.5417e-09	168.8	2	2	2	2	2	2	3756800000	1058000000	997650000	582770000	640610000	368280000	109470000
SEGDGVYALNSEK	13	0	1367.62	F6XWM5	F6XWM5	59	71	yes	1;2;3	1.9997e-262	357.53	6	6	4	7	5	3	28813000000	5422600000	6088300000	5310900000	5465200000	4870600000	1655800000
SEGNTWLTAFVLK	13	0	1464.76	F6RI47;F6R942	F6RI47	1039	1051	yes	2;3	3.4896e-06	179.42	2	2	2	2	2	2	2969500000	799730000	817460000	397940000	583170000	364340000	6870500
SEIAHR	6	0	711.366	F7BAY6;Q5XLE4;P35747	F7BAY6	29	34	no	2	0.031106	130.65	4	4	2	4	2	5	107230000000	10169000000	19745000000	27365000000	11928000000	19507000000	18518000000
SEIMYTDEK	9	0	1114.49	F7AED2	F7AED2	171	179	yes	2	0.0004248	143.01	2	2	3	3	2	3	12162000000	2470500000	3284400000	1680100000	2694000000	1672100000	360480000
SEITELR	7	0	846.445	F6SJK9;F6SQQ0;F6WDW3;F6SS14	F6SJK9	253	259	yes	2	0.0079894	134.44	1	1	1	1		1	76681000	8677200	0	5961800	50751000	8107600	3183300
SELLESLDK	9	0	1032.53	F6REX3	F6REX3	1172	1180	yes	1;2	0.00025764	152.47	1	1	1	2	2	1	328050000	68030000	77243000	61250000	56651000	41868000	23005000
SEVQVHSGSLQNNVQLSNGQK	21	0	2252.11	F6YCW8;F6YE73;G5CW75	F6YCW8	3591	3611	yes	3	2.0452e-05	57.985	1	1	1	1	1	1	95592000	16996000	26755000	18483000	20014000	9767500	3576200
SFAILYLER	9	0	1110.61	F6Y0C1	F6Y0C1	133	141	yes	2	0.0011722	128.69	1	1		1	1	1	45421000	6179200	7739400	14200000	7724500	9577300	0
SFEHDKPGK	9	1	1043.5	F7DTV1	F7DTV1	76	84	yes	2	8.457e-08	172.94	1	1	1	1	1	1	978700000	216510000	229730000	112410000	205510000	169290000	45250000
SFGGQCR	7	0	810.344	F6Q7J3	F6Q7J3	159	165	yes	2	0.046209	100.27	1	1		1		1	368840000	33650000	0	137040000	108800000	89352000	0
SFHGNNPCIGTDLNR	15	0	1700.77	F6PSH3	F6PSH3	243	257	yes	2;3	6.046e-06	142.08	2	2	1	2	2	2	463570000	85227000	85121000	86446000	85168000	102580000	19017000
SFVHLEPMPR	10	0	1211.61	F6RI47;F6R942	F6RI47	457	466	yes	2;3	5.8347e-19	196.95	11	11	5	12	11	9	26723000000	9325600000	7615900000	2070300000	2451300000	3258400000	2001600000
SGAAATWTELPWPHEK	16	0	1779.86	F6X1I8	F6X1I8	387	402	yes	2;3	5.2319e-17	212.9	3	2	2	2	3	2	7547300000	1238500000	1491900000	1245600000	1793700000	1223100000	554410000
SGEQVAYK	8	0	880.429	F6UHF2;F6ZR63	F6ZR63	1016	1023	no	2	0.022257	109.36	1	1	1	1	1	1	4449700000	1093500000	847730000	806340000	1025700000	638350000	37987000
SGGLYLPAQESQVPPFTIPK	20	0	2128.12	F6YCW8;F6YE73;F6Z5E1	F6YCW8	1284	1303	yes	2	0.00021117	85.837	1	1		1	1	1	113720000	15732000	21960000	12695000	43603000	19735000	0
SGIECQLWR	9	0	1147.54	F7BFJ1	F7BFJ1	126	134	yes	2	6.7549e-06	163.77	1	1	1	1	1	1	2356700000	450050000	689600000	355820000	416510000	362740000	81929000
SGIVSGFGR	9	0	878.461	F6TDH5	F6TDH5	364	372	yes	2	0.0045447	116.73	1	1	1	1	1	1	111660000	16706000	16609000	19420000	17483000	29303000	12143000
SGNENGEFYLR	11	0	1284.57	F6T0M8;F6PVG3	F6T0M8	427	437	yes	2	9.9574e-05	138.98				2	2	1	39270000	7975300	15010000	16285000	0	0	0
SGNFQLLCPDGTR	13	0	1463.68	F6ZEH8;O97966;O97678	F6ZEH8	571	583	no	2;3	4.5237e-09	196.88	3	2	2	3	3	3	38876000000	8515100000	8607200000	6542600000	7872900000	5202300000	2135900000
SGNFQLLCPDGTRK	14	1	1591.78	F6ZEH8;O97966;O97678	F6ZEH8	571	584	no	2;3	0.00023051	74.769	1	1	1	5	3	1	249500000	70621000	76288000	31472000	27987000	31601000	11527000
SGSDEVQVGQER	12	0	1289.58	F7BTW7;F7E454;F7CJG3	F7BTW7	1572	1583	yes	2	4.0608e-65	242.59	1	1	2	1	1	1	4389100000	844780000	1310200000	707930000	864440000	553180000	108620000
SGVCIPNQHK	10	0	1138.56	F7APU2;F7AU56	F7APU2	244	253	yes	2;3	0.00014627	133.6	2	3	2	2	3	2	1651600000	359710000	344380000	318510000	321410000	284500000	23134000
SHCIAEVK	8	0	942.459	F7BAY6;Q5XLE4;P35747	F7BAY6	310	317	no	2	9.663e-06	169.06	5	3	2	5	4	2	82160000000	14491000000	11114000000	15643000000	19449000000	15124000000	6338200000
SHCIAEVKEDDLPSDLPALAADFAEDK	27	1	2955.38	F7BAY6;Q5XLE4;P35747	F7BAY6	310	336	no	2;3;4	3.7893e-89	279.54	9	12	6	9	14	12	23052000000	2536800000	3192200000	4891600000	4531300000	5333800000	2566700000
SHCIAEVKEDDLPSDLPALAADFAEDKEICK	31	2	3485.63	F7BAY6;Q5XLE4;P35747	F7BAY6	310	340	no	3;4;5	2.9596e-57	171.05	16	14	10	19	15	14	23049000000	4742600000	2773400000	3997600000	3343500000	4594100000	3597800000
SHFNADFTLK	10	0	1178.57	P48770;F6UFT2	P48770	233	242	yes	3	0.018214	47.844	1		2	1	1	2	41508000	28658000	3782500	3666700	4007700	0	1393200
SIAQYWLGCPAPDEK	15	0	1733.81	F6V881	F6V881	464	478	yes	3	5.7438e-05	78.932	1	1	1	1	1		44841000	8339900	6231500	0	8563600	15715000	5990300
SICQFQGR	8	0	994.465	F6Q4N3	F6Q4N3	335	342	yes	2	0.033331	113.25	1	1	1	1	1	1	37386000	10316000	6201500	7048800	6527800	5565300	1726800
SICSTTSIQCK	11	0	1283.59	F7ATC2	F7ATC2	83	93	yes	2	0.0040613	94.692	1	1		1	1	1	55442000	12109000	10511000	7996400	12231000	12595000	0
SIEVFGQFNGQR	12	0	1380.68	P48770;F6UFT2	P48770	66	77	yes	2	1.1939e-07	149.57	1	1	1	1	1	1	93962000	26564000	29926000	11892000	12852000	8230300	4497200
SINIAILSQK	10	0	1085.64	F7B3I5	F7B3I5	237	246	yes	2	0.010482	112.01	1	1		1	1	1	146650000	44181000	33947000	24275000	25836000	18413000	0
SINPAVDHCCK	11	0	1299.57	F7B3I5	F7B3I5	490	500	yes	2;3	0.00027819	131.44	3	3	2	1	3	2	439040000	90011000	128070000	65145000	17351000	96868000	41596000
SISCEEIPGQQTR	13	0	1503.7	F6SP74	F6SP74	333	345	yes	2	0.0010281	120.06	1	1	1	1	2	1	236600000	45890000	29501000	39901000	34268000	47236000	39807000
SISISVAR	8	0	831.481	F7B7X0	F7B7X0	73	80	yes	2	0.027118	104.45	1	1					31612000	0	0	0	20224000	11389000	0
SISTALDHK	9	0	970.508	F6YCW8;F6YE73	F6YCW8	1917	1925	yes	2	0.0092527	107.9	1	1		1	1		155670000	37607000	41845000	0	65092000	11128000	0
SIVPAPPLVACVK	13	0	1349.77	F6ZEH8;Q9TQV7;P27425	P27425	45	57	no	2;3	0.00020766	111.65	3	2	4	3	3	3	24275000000	4931000000	6446100000	3400300000	5186600000	2727800000	1582800000
SKDFHLFSSPHGK	13	1	1485.74	F6ZEH8;Q9TQV8;P27425	P27425	300	312	no	2;3;4	0.00064728	140.63	10	5	5	11	11	12	7902200000	2680600000	2206800000	950820000	1418700000	493510000	151750000
SKFDPSLTQR	10	1	1177.61	F6X449	F6X449	243	252	yes	3	0.00018928	111.27	1	1	1	1	1	1	161710000	29997000	31356000	22535000	33965000	32975000	10882000
SKLPGIVAEGR	11	1	1125.65	F7CYR1	F7CYR1	382	392	yes	2;3	0.0016721	153.05	2	2		2	2	2	6094000000	699430000	1050300000	1303500000	1641400000	1399400000	0
SLAELSGHLDR	11	0	1196.61	F6RZ27	F6RZ27	288	298	yes	3	0.00066293	97.734	1	1	1	1	1	1	618930000	98243000	146750000	135700000	121640000	85110000	31492000
SLAPTAAAK	9	0	828.471	F7DL17;F7CTJ3;F7DAF6	F7DL17	597	605	yes	2	0.044706	84.568	1	1		1	1	1	2147200000	514590000	483970000	336990000	448410000	363280000	0
SLDGISQPAQELK	13	0	1384.72	F6QAT0;F6R735	F6QAT0	557	569	yes	2	0.014033	62.303	1			1	1	1	24448000	8208500	5364600	4949000	5926100	0	0
SLDLDSIIAEVK	12	0	1301.71	F6W7V0;F6S8W6;F7D281;F6ZND8;F7AGY4	F6W7V0	331	342	no	2	2.4794e-16	160.75	1	1	1	1	1		215900000	40821000	23197000	0	140330000	0	11560000
SLDLSTDPDLAAEK	14	0	1473.72	F6W4R2	F6W4R2	239	252	yes	2	0.00055082	121.08	1	1	1	1	1	1	1138100000	226560000	209680000	199110000	246480000	178530000	77694000
SLEEEAIK	8	0	917.471	F6QAD8;F6R6K3;F6R7S3	F6QAD8	1164	1171	yes	2	0.017238	113.7	1	1	1	1	1	1	281370000	50645000	55151000	51392000	65213000	46168000	12800000
SLEVTFTPTNEDIGK	15	0	1649.81	F6WUE0;A7LP08	F6WUE0	165	179	yes	2	0.062144	43.628	1	1	1		1	1	48074000	0	11705000	12337000	10869000	8300000	4863900
SLEYLDLSFNQMSK	14	0	1673.8	F6SKT2;B8K277;A2Q0Z2	F6SKT2	188	201	yes	2	0.00055302	103.35	1	1		1		1	55659000	16009000	0	9726200	15144000	14780000	0
SLFNDLIADK	10	0	1134.59	F6QAD8;F6R6K3;F6R7S3	F6QAD8	72	81	yes	2	7.9258e-05	137.13	1	1		1	1	1	404760000	92309000	65461000	86785000	78413000	81796000	0
SLFTDLVAEK	10	0	1121.6	F6RI47;F6R942	F6RI47	72	81	yes	2	4.8606e-05	141.48	3	2	1	2	1	2	34408000000	7640600000	5624300000	5164100000	6491400000	4857600000	4629800000
SLGASLTPYADQLK	14	0	1462.77	F6RZ27	F6RZ27	174	187	yes	2;3	1.0976e-06	175.15	2	2	2	2	1	1	1259500000	329240000	266700000	163180000	302340000	158310000	39745000
SLGPHSCSANGLGLYLIQGPNLYCYSDVEK	30	0	3311.56	F6X1I8	F6X1I8	412	441	yes	3	5.3709e-50	156.52	1	1	1	1	1	1	252180000	47379000	55764000	35295000	30661000	33981000	49096000
SLHMYASSLLDHR	13	0	1528.75	F6YCW8;F6YE73;F6Z5E1	F6YCW8	1162	1174	yes	3;4	0.00019158	100.31	3	2	2	4	2	2	174710000	21962000	83696000	28977000	21383000	12251000	6441200
SLHTLFGDK	9	0	1016.53	F7BAY6;Q5XLE4;P35747	F7BAY6	89	97	no	2	0.00040956	147.29	8	5	5	7	8	8	43526000000	9289600000	10006000000	6588300000	9676900000	5487300000	2478300000
SLISQHNV	8	0	896.472	F7APU2;F7AU56	F7APU2	552	559	yes	1	0.045368	98.458	1	1		1	1	1	85568000	15903000	20045000	15322000	18784000	15514000	0
SLLGTLEEAK	10	0	1059.58	Q29482	Q29482	68	77	yes	2	0.0018341	126.41	1	1	1	1	1	1	2337000000	374850000	455010000	395810000	553180000	435590000	122600000
SLLGTLEEAKK	11	1	1187.68	Q29482	Q29482	68	78	yes	2;3	0.0017657	101.9	2	2		2	2	2	347530000	83991000	140900000	41925000	38477000	42235000	0
SLLNGDIGECTDR	13	0	1448.66	F7C0D9;F7C0Z0	F7C0D9	222	234	yes	2	1.3311e-28	192.38	1	2	1	2	1	1	2467800000	628430000	816340000	298960000	288020000	305740000	130340000
SLMLHYEFLQR	11	0	1435.73	F7AXF6	F7AXF6	312	322	yes	3	0.039111	46.73					1		0	0	0	0	0	0	0
SLNHVAIASILPK	13	0	1361.8	F6YCW8;F6YE73;F6Z5E1	F6YCW8	316	328	yes	2;3	0.0002061	150.09	2	3	3	2	2	2	251110000	49536000	73803000	40272000	40701000	35843000	10958000
SLPAPLDHINLHVR	14	0	1580.88	F6PUW3	F6PUW3	1701	1714	yes	3;4	0.00074292	69.602	2		2	2	2	2	41394000	16887000	12500000	5730600	4713400	0	1564000
SLQNSADQAYQGAMR	15	0	1638.74	F6YCW8;F6YE73	F6YCW8	4059	4073	yes	2	3.0793e-05	122.51	1	1	1	1	1	1	87054000	16834000	22155000	11678000	13138000	17330000	5918700
SLQPGSEYTVTLVAVK	16	0	1690.91	F7CN05;F7CN11;F7CS60	F7CN05	1054	1069	yes	2	2.0782e-05	93.011	1	1	1	1	1	1	397130000	115150000	68057000	123610000	24489000	30768000	35067000
SLQSVCQEIEGEIEYLK	17	0	2023.98	F6YCW8;F6YE73	F6YCW8	4256	4272	yes	2	4.9559e-05	82.362					1		0	0	0	0	0	0	0
SLVCNGDSDCEEDSADEDR	19	0	2171.79	F6Q7J3	F6Q7J3	99	117	yes	2;3	1.0927e-05	79.633	1	2				1	58309000	0	0	0	17373000	40936000	0
SLVDLQLTHNK	11	0	1266.69	F6SKT2;B8K277;A2Q0Z2;Q865A5	F6SKT2	141	151	yes	2;3	5.0915e-05	142.92	2	2	2	2	2	2	192870000	36267000	34518000	48763000	43316000	22101000	7907700
SLWDLLK	7	0	873.496	F6YCW8;F6YE73;G5CW75	F6YCW8	3639	3645	yes	2	0.048934	97.068	1	1		1	1	1	80634000	14933000	24324000	14423000	14313000	12641000	0
SLYGSSPR	8	0	865.429	F7CZW9	F7CZW9	218	225	yes	2	0.0032233	131.04	1		1	1		1	5240200000	1756300000	0	1798300000	1527000000	0	158620000
SMGVTALFDK	10	0	1067.53	F7BM31	F7BM31	408	417	yes	2	0.0086092	105.4	2	1	2	1	1	1	1094500000	226770000	281280000	167690000	205690000	160680000	52428000
SMVAVMDSDTTGK	13	0	1340.6	F6RLT8	F6RLT8	143	155	yes	2	0.0011579	84.658				1	1		10968000	5827200	5140500	0	0	0	0
SNALDIIFQTDQTEQK	16	0	1849.91	F7BQD6	F7BQD6	271	286	yes	2	3.7196e-39	229.97	1	1	1	1	1	1	193870000	0	49870000	24330000	36654000	38166000	44851000
SNDEVDDSAAELK	13	0	1391.61	F6QAT0;F6R735	F6QAT0	1344	1356	yes	2	0.030117	55.721	1	1		1			75865000	9235600	0	0	22643000	43986000	0
SNEGTYYESQYK	12	0	1467.62	F6PQ46	F6PQ46	484	495	yes	2	0.0022272	121.6	1	1	1	1	1	1	4688300000	755460000	1324800000	752610000	920350000	758420000	176730000
SNGQPEPEAK	10	0	1055.49	H9GZT5	H9GZT5	269	278	yes	2	0.0035057	103.82	1	1	1	1	1	1	2718700000	506660000	370610000	462660000	616150000	571790000	190870000
SNGQWQTPR	9	0	1072.51	F6PPQ0	F6PPQ0	61	69	yes	2	0.00014539	125.31						2	0	0	0	0	0	0	0
SNTVANLHTEK	11	0	1212.61	F6YCW8;F6YE73	F6YCW8	2813	2823	yes	2;3	0.0075068	98.048	2	1	1	2	2	2	185230000	24047000	54300000	32580000	45699000	21985000	6616400
SPATVSNPGYCGSVSR	16	0	1637.75	F7AN01	F7AN01	138	153	yes	2	7.3223e-06	119.39	1	1		1	1	1	87359000	18467000	22760000	16367000	17881000	11884000	0
SPEQQDTVLNGNFIVR	16	0	1815.91	F6R3F4	F6R3F4	224	239	yes	2;3	7.3068e-24	215.46	2	2	2	2	3	2	405350000	76367000	136860000	70898000	46769000	56601000	17857000
SPLFVGK	7	0	746.433	B5BV04;B5BV07;B5BV11;B5BV10;B5BV06;B5BV13;B5BV09;B5BV08;B5BV12;F7BF31;F7CSL8;F7CYP1;F7DXM5	B5BV07	408	414	no	2	0.047789	98.415	1	1	1	1	1	1	15031000000	2352700000	2642200000	3424600000	3525100000	3085200000	1551700
SPPGPPPLFPR	11	0	1160.63	F6RRV1	F6RRV1	20	30	yes	2	1.4801e-12	175.38	2	2		1	1	1	124680000	41443000	25993000	25627000	18916000	12700000	0
SPQELLCGASLISDR	15	0	1644.81	F7BFJ1	F7BFJ1	386	400	yes	2;3	8.0315e-111	256.52	2	2	2	2	2	2	2052400000	49885000	324640000	361560000	597890000	467340000	251090000
SPSQSDINK	9	0	974.467	F6YCW8;F6YE73;F6Z5E1	F6YCW8	527	535	yes	2	0.0004159	136.27	3	1		2	1	1	276520000	21592000	112280000	56959000	66034000	19663000	0
SPVTFVAPAMSLPEEHSR	18	0	1953.96	F7C0D2	F7C0D2	258	275	yes	3	1.8581e-10	128.11	1	1	1	1	1	1	190610000	44915000	35692000	44964000	22122000	31543000	11378000
SQELCGNEVPEVPAFGQK	18	0	1987.93	F6REX3	F6REX3	888	905	yes	2;3	3.4918e-21	160.48	2	2	2	2	2	2	915260000	193190000	254720000	118090000	139240000	157590000	52436000
SQFPESWLWGIEELKEPEK	19	1	2331.14	F7BTW7;F7E454;F7CJG3	F7BTW7	764	782	yes	3	0.00083073	65.951	1	1	1	2	1	2	311260000	81726000	52581000	70526000	34993000	39432000	31998000
SQFPESWLWTIEELKEPEK	19	1	2375.17	F7BLE3	F7BLE3	767	785	yes	2;3	9.1758e-10	97.058	2	3	2	4	4	4	914990000	224090000	228700000	190150000	122140000	84746000	65167000
SQGNTWLTAFVLK	13	0	1463.78	F6REX3	F6REX3	1044	1056	yes	2	0.0029064	91.855	1	1		1	1	1	108410000	22553000	21357000	18590000	15531000	30384000	0
SQLAPYAEDAQEK	13	0	1448.68	F6RZ27	F6RZ27	221	233	yes	2	0.00093563	117.8	1	1	1	1	1	1	1351000000	357660000	305950000	230970000	279600000	141260000	35546000
SQLDSLAQEVALLK	14	0	1513.84	F7AW05	F7AW05	49	62	yes	2;3	3.8621e-10	130.56	2	2	1	2	2	2	2398900000	542890000	530030000	364180000	417210000	380560000	164020000
SQLQTAPPEWTALTEIQQMK	20	0	2299.15	O97641;F6RUZ6	F6RUZ6	240	259	no	2;3	0.0001693	94.765	2	1		2	1	1	185320000	96722000	22014000	16035000	28146000	22406000	0
SQLTVSQYTLPK	12	0	1363.73	F6YCW8;F6YE73;G5CW75	F6YCW8	3774	3785	yes	2	0.0027845	101.93	1	1	1	1	1	1	380990000	91257000	105620000	57337000	62258000	51855000	12661000
SQSLWTAIMCTEEGWSPAPK	20	0	2278.04	F7E3H8;F7E2N9	F7E3H8	63	82	no	2;3	1.4051e-45	192.65	2	2	1	2	2	2	147610000	32097000	48994000	19933000	15172000	24719000	6689700
SQTYICNVAHPASSTK	16	0	1762.83	H9GZU8;H9GZT5	H9GZU8	78	93	no	2;3;4	6.0352e-24	179.02	11	12	5	14	12	11	146620000000	30515000000	29420000000	32782000000	30668000000	21002000000	2228000000
SQTYICNVAHPASSTKVDK	19	1	2105.02	H9GZU8;H9GZT5	H9GZU8	78	96	no	3;4	0.00069897	60.062	2	2	1	2	2	2	296180000	64723000	48962000	49978000	56393000	72217000	3911800
SQVPPGPAPPLQVHPEGPR	19	0	1959.03	F6T7X3;F7DLT3	F6T7X3	304	322	yes	3	0.00023822	62.966	1	3	3		2	1	144710000	0	42800000	24880000	26031000	38652000	12346000
SQYAAALVWEK	11	0	1264.65	F6YQL3	F6YQL3	449	459	yes	2	0.045514	69.979	2	2	1	2	2	2	73068000	17904000	16568000	12213000	14142000	9138100	3103700
SSAVTHR	7	0	756.388	F7BTW7;F7E454;F7CJG3	F7BTW7	1305	1311	yes	2	0.0061086	138.85			1				257540000	0	0	0	0	0	257540000
SSCDQLEK	8	0	965.412	F6W4R2	F6W4R2	51	58	yes	2	0.0039076	129.68	1	1		1	1	1	1620400000	336720000	303140000	380570000	340550000	259420000	0
SSDADWVTEK	10	0	1136.5	F6RMD0	F6RMD0	329	338	yes	2	3.062e-06	155.84	1	1	1	1	1	1	1823100000	367520000	407260000	365880000	397080000	222340000	62979000
SSELVSANR	9	0	961.483	F7CYR1	F7CYR1	170	178	yes	2	6.732e-81	261.48	2	1	1	1	1	1	6797100000	469660000	526220000	1714200000	1091200000	2536300000	459450000
SSFVAPLEK	9	0	976.523	F7BKE1	F7BKE1	152	160	yes	2	0.017843	97.431	1		1	1	1	1	846280000	227570000	162700000	240640000	214180000	0	1181900
SSGSLLNNAIK	11	0	1102.6	F6RI47;F6R942;F6QAD8;F6R6K3;F6R7S3	F6RI47	1086	1096	no	2	1.224e-25	199.02	2	1	1	2	2	2	17701000000	4025000000	3798000000	2715700000	3833000000	2372000000	957430000
SSGVPDR	7	0	716.345	A0A0A1E6P5	A0A0A1E6P5	76	82	no	2	0.0043299	143.02	1	1	2		1	1	5392900000	0	1526400000	1391300000	1517800000	668960000	288440000
SSITIDPDVK	10	0	1073.56	F6SVM0;F6SV16	F6SVM0	2	11	yes	2;3	0.0013736	101.28	1	2		2	2	1	485880000	199660000	19846000	31984000	57673000	176720000	0
SSKQSNGKYAASSYLTR	17	2	1846.92	A0A0A1E6J6;A0A0A1E6L0;A0A0A1E6I9;F7CAC5;A0A0A1E6Q9;A0A0A1E470;A0A0A1E6H5;A0A0A1E4N8;A0A0A1E3Z9;A0A0A1E447;A0A0A1E6J8;A0A0A1E6D7;A0A0A1E4T2;A0A0A1E4L2;A0A0A1E406;A0A0A1E966;A0A0A1E955;A0A0A1E6Q6;A0A0A1E6K4;A0A0A1E6E2;A0A0A1E6D2;A0A0A1E556;A0A0A1E532;A0A0A1E4R8;A0A0A1E483;A0A0A1E3Z2;A0A0A1E6H1;A0A0A1E4S5;A0A0A1E6K2;A0A0A1E6N5;A0A0A1E971;A0A0A1E412;A0A0A1E976;A0A0A1E9C4;A0A0A1E417;A0A0A1E464;A0A0A1E…	A0A0A1E417	184	200	no	3	0.00010489	79.514		1					27850000	0	0	0	0	27850000	0
SSLAVPYVIVPLK	13	0	1384.83	F7BLE3;F7BTW7;F7E454;F7CJG3	F7BTW7	891	903	no	2;3	0.00019372	99.539	2	2	1	2	2	2	6360800000	1257700000	1344000000	1020500000	1100000000	1269700000	368920000
SSLLFNPK	8	0	904.502	Q29482	Q29482	215	222	yes	2	0.041973	94.262	1	1	1	1	1	1	1212000000	244660000	278840000	219250000	247550000	171640000	50044000
SSLNQTYICSVAHPASSTK	19	0	2049.98	H9GZU9	H9GZU9	73	91	yes	3	0.00022031	62.648	1	1	1	1	1	1	221860000	26037000	91672000	72674000	15643000	12872000	2961700
SSPDSAEDVR	10	0	1061.46	F7C450	F7C450	133	142	yes	2	0.040512	88.37	1	1		1	1	1	481980000	144280000	60713000	75268000	147970000	53751000	0
SSPDSAEDVRK	11	1	1189.56	F7C450	F7C450	133	143	yes	2	0.0086052	98.009	1	1		1	1	1	92933000	14013000	23917000	15993000	15675000	23334000	0
SSPEPGQMLNYDLR	14	0	1605.75	F7DZ01	F7DZ01	473	486	yes	2	0.035449	51.013	1	1	1	1	1		61092000	16193000	21528000	0	12633000	7438000	3299600
SSQDMLTIMEK	11	0	1281.59	F7CZW9	F7CZW9	381	391	yes	2	0.0004616	132.01	1	1		1	1	1	1107400000	311670000	181430000	198070000	213340000	202930000	0
SSSDNDIALLR	11	0	1189.59	F6X667;Q28380	F6X667	296	306	yes	2	5.8034e-35	214.12	1	1	1	1	1	1	282600000	76217000	80021000	34470000	51380000	33023000	7487300
SSSGPDLTWNSLK	13	0	1390.67	Q9TQW8	Q9TQW8	9	21	yes	2	3.2843e-28	185.29	2	2	2	1	1	3	10467000000	2663400000	2231800000	2230100000	1470500000	1117100000	753660000
SSSMVFR	7	0	812.385	Q4W447;F6YXS1	Q4W447	288	294	yes	2	0.039854	107.74				1	1		56033000	31929000	24104000	0	0	0	0
SSSNCAEVYR	10	0	1171.49	F6QQT6	F6QQT6	153	162	yes	2	8.7342e-36	222.18	1	1	1	1		1	642180000	153410000	0	204200000	182150000	74348000	28079000
SSSSVSCQVTHQGK	14	0	1490.68	A0A0A1E6Q0;A0A0A1E9B9;A0A0A1E550;A0A0A1E439;A0A0A1E998;A0A0A1E6P5;A0A0A1E3Y7;A0A0A1E4U0;A0A0A1E422;A0A0A1E4Z5;A0A0A1E6G2;A0A0A1E543;A0A0A1E981;A0A0A1E6I1;A0A0A1E986;A0A0A1E6M0;A0A0A1E4W7;A0A0A1E487;A0A0A1E430;A0A0A1E513;F6SP11	A0A0A1E6P5	211	224	no	2;3	2.3096e-05	133.81	2	2		2	2	2	297610000	37792000	129650000	25544000	48664000	55965000	0
SSTGPGEQLR	10	0	1030.5	Q9BG80;F6U3D3	Q9BG80	640	649	yes	2	0.033769	76.064	1			1	1		35640000	11915000	8464300	0	15261000	0	0
SSVGVQPILNEHTFCAGLSK	20	0	2143.07	F6XWM5	F6XWM5	266	285	yes	2;3	2.0168e-21	181.67	6	4	3	4	4	7	34318000000	1814300000	13566000000	11262000000	1343600000	991470000	5340600000
STAAVSTYAEILTDQFLSLLK	21	0	2270.2	F7A1W7	F7A1W7	78	98	yes	2;3	9.5597e-13	123.38			1	1	1	2	77665000	11013000	17889000	23601000	0	0	25163000
STCTSEGWSPAPR	13	0	1434.62	F7C7J6	F7C7J6	74	86	yes	2	3.1978e-28	185.61	1	1	1	1	1	1	435760000	69032000	96202000	91773000	85772000	81750000	11230000
STELCAGHLVGGVDSCQGDSGGPLVCFEK	29	0	3035.34	F6USP9;P80010;Q9TV90	F6USP9	748	776	yes	3	1.6986e-46	166.57	1	1	1	1	1	1	3249800000	551610000	434820000	633610000	556260000	489710000	583820000
[truncated: 571 more rows]
