# Supplementary material for: Label-Free Mass Spectrometry-Based Quantitative Proteomics Analysis of Serum Proteins During Early Pregnancy in Jennies (Equus asinus)
Source: Front Vet Sci. 2020 Oct 22;7:569587. doi: 10.3389/fvets.2020.569587 (PMC7642908; doi:10.3389/fvets.2020.569587)
Supplement: Supplementary file 4 [file Table_4.xlsx]

## Sheet: Information of enrichment
1.Detailed information of GO-based enrichment of the differentially expressed proteins
maxLevel	levels	GO_Name	GO_ID	Category	Pvalue	Pvalue_adjusted	Genes	Count	Pop_Hit	List_Total	Background_Genes	URL
5	5	blood coagulation	GO:0007596	P	0.000296	0.0798	LOC100630489|2.91652313698;THBS1|14.4261563852;TREML1|20.0	3	151	16	295	http://www.ebi.ac.uk/QuickGO/GTerm?id=GO:0007596
5	5	hemostasis	GO:0007599	P	0.000308	0.0798	LOC100630489|2.91652313698;THBS1|14.4261563852;TREML1|20.0	3	153	16	295	http://www.ebi.ac.uk/QuickGO/GTerm?id=GO:0007599
4	4	coagulation	GO:0050817	P	0.000326	0.0798	LOC100630489|2.91652313698;THBS1|14.4261563852;TREML1|20.0	3	156	16	295	http://www.ebi.ac.uk/QuickGO/GTerm?id=GO:0050817
6	5,6	negative regulation of dendritic cell antigen processing and presentation	GO:0002605	P	0.000886	0.0812	THBS1|14.4261563852	1	1	16	295	http://www.ebi.ac.uk/QuickGO/GTerm?id=GO:0002605
9	6,7,8,9	negative regulation of cGMP-mediated signaling	GO:0010754	P	0.000886	0.0812	THBS1|14.4261563852	1	1	16	295	http://www.ebi.ac.uk/QuickGO/GTerm?id=GO:0010754
8	8	negative regulation of endopeptidase activity	GO:0010951	P	0.000901	0.0812	THBS1|14.4261563852;SERPINA7|2.25313591472;SERPINB10|20.0	3	221	16	295	http://www.ebi.ac.uk/QuickGO/GTerm?id=GO:0010951
7	7	negative regulation of peptidase activity	GO:0010466	P	0.00108	0.0812	THBS1|14.4261563852;SERPINA7|2.25313591472;SERPINB10|20.0	3	235	16	295	http://www.ebi.ac.uk/QuickGO/GTerm?id=GO:0010466
4	4	regulation of body fluid levels	GO:0050878	P	0.00141	0.0812	LOC100630489|2.91652313698;THBS1|14.4261563852;TREML1|20.0	3	258	16	295	http://www.ebi.ac.uk/QuickGO/GTerm?id=GO:0050878
5	5	proteolysis	GO:0006508	P	0.00168	0.0812	PEPD|1.52873541741;THBS1|14.4261563852;SERPINA7|2.25313591472;SERPINB10|20.0;CAPNS1|20.0;HGFAC|20.0	6	1585	16	295	http://www.ebi.ac.uk/QuickGO/GTerm?id=GO:0006508
9	6,7,8,9	regulation of cGMP-mediated signaling	GO:0010752	P	0.00177	0.0812	THBS1|14.4261563852	1	2	16	295	http://www.ebi.ac.uk/QuickGO/GTerm?id=GO:0010752
5	5	wound healing	GO:0042060	P	0.00185	0.0812	LOC100630489|2.91652313698;THBS1|14.4261563852;TREML1|20.0	3	284	16	295	http://www.ebi.ac.uk/QuickGO/GTerm?id=GO:0042060
5	5	platelet activation	GO:0030168	P	0.0024	0.0812	LOC100630489|2.91652313698;TREML1|20.0	2	83	16	295	http://www.ebi.ac.uk/QuickGO/GTerm?id=GO:0030168
6	6	negative regulation of proteolysis	GO:0045861	P	0.00247	0.0812	THBS1|14.4261563852;SERPINA7|2.25313591472;SERPINB10|20.0	3	314	16	295	http://www.ebi.ac.uk/QuickGO/GTerm?id=GO:0045861
6	4,6	positive regulation of epithelial cell migration	GO:0010634	P	0.00264	0.0812	THBS1|14.4261563852;GLIPR2|20.0	2	87	16	295	http://www.ebi.ac.uk/QuickGO/GTerm?id=GO:0010634
7	6,7	negative regulation of nitric oxide mediated signal transduction	GO:0010751	P	0.00266	0.0812	THBS1|14.4261563852	1	3	16	295	http://www.ebi.ac.uk/QuickGO/GTerm?id=GO:0010751
5	5	negative regulation of antigen processing and presentation of peptide or polysaccharide antigen via MHC class II	GO:0002581	P	0.00266	0.0812	THBS1|14.4261563852	1	3	16	295	http://www.ebi.ac.uk/QuickGO/GTerm?id=GO:0002581
7	6,7	regulation of nitric oxide mediated signal transduction	GO:0010749	P	0.00266	0.0812	THBS1|14.4261563852	1	3	16	295	http://www.ebi.ac.uk/QuickGO/GTerm?id=GO:0010749
5	5	positive regulation of cell migration	GO:0030335	P	0.00267	0.0812	LOC100630489|2.91652313698;THBS1|14.4261563852;GLIPR2|20.0	3	323	16	295	http://www.ebi.ac.uk/QuickGO/GTerm?id=GO:0030335
5	4,5	positive regulation of cell motility	GO:2000147	P	0.00289	0.0812	LOC100630489|2.91652313698;THBS1|14.4261563852;GLIPR2|20.0	3	332	16	295	http://www.ebi.ac.uk/QuickGO/GTerm?id=GO:2000147
3	3	positive regulation of behavior	GO:0048520	P	0.00301	0.0812	LOC100630489|2.91652313698;THBS1|14.4261563852	2	93	16	295	http://www.ebi.ac.uk/QuickGO/GTerm?id=GO:0048520
4	4	positive regulation of cellular component movement	GO:0051272	P	0.00306	0.0812	LOC100630489|2.91652313698;THBS1|14.4261563852;GLIPR2|20.0	3	339	16	295	http://www.ebi.ac.uk/QuickGO/GTerm?id=GO:0051272
7	7	regulation of endopeptidase activity	GO:0052548	P	0.00317	0.0812	THBS1|14.4261563852;SERPINA7|2.25313591472;SERPINB10|20.0	3	343	16	295	http://www.ebi.ac.uk/QuickGO/GTerm?id=GO:0052548
3	3	positive regulation of locomotion	GO:0040017	P	0.00327	0.0812	LOC100630489|2.91652313698;THBS1|14.4261563852;GLIPR2|20.0	3	347	16	295	http://www.ebi.ac.uk/QuickGO/GTerm?id=GO:0040017
6	5,6	blastocyst hatching	GO:0001835	P	0.00354	0.0812	GRN|20.0	1	4	16	295	http://www.ebi.ac.uk/QuickGO/GTerm?id=GO:0001835
5	5	hatching	GO:0035188	P	0.00354	0.0812	GRN|20.0	1	4	16	295	http://www.ebi.ac.uk/QuickGO/GTerm?id=GO:0035188
6	5,6	negative regulation of endothelial cell chemotaxis	GO:2001027	P	0.00354	0.0812	THBS1|14.4261563852	1	4	16	295	http://www.ebi.ac.uk/QuickGO/GTerm?id=GO:2001027
9	7,8,9	regulation of plasma membrane long-chain fatty acid transport	GO:0010746	P	0.00354	0.0812	THBS1|14.4261563852	1	4	16	295	http://www.ebi.ac.uk/QuickGO/GTerm?id=GO:0010746
4	4	organism emergence from protective structure	GO:0071684	P	0.00354	0.0812	GRN|20.0	1	4	16	295	http://www.ebi.ac.uk/QuickGO/GTerm?id=GO:0071684
10	6,8,9,10	negative regulation of plasma membrane long-chain fatty acid transport	GO:0010748	P	0.00354	0.0812	THBS1|14.4261563852	1	4	16	295	http://www.ebi.ac.uk/QuickGO/GTerm?id=GO:0010748
6	6	negative regulation of hydrolase activity	GO:0051346	P	0.00355	0.0812	THBS1|14.4261563852;SERPINA7|2.25313591472;SERPINB10|20.0	3	357	16	295	http://www.ebi.ac.uk/QuickGO/GTerm?id=GO:0051346
4	4	cell activation	GO:0001775	P	0.00371	0.0812	LOC100630489|2.91652313698;LCP1|1.74267242192;THBS1|14.4261563852;TREML1|20.0	4	756	16	295	http://www.ebi.ac.uk/QuickGO/GTerm?id=GO:0001775
5	4,5	positive regulation of chemotaxis	GO:0050921	P	0.00388	0.0812	LOC100630489|2.91652313698;THBS1|14.4261563852	2	106	16	295	http://www.ebi.ac.uk/QuickGO/GTerm?id=GO:0050921
6	6	regulation of peptidase activity	GO:0052547	P	0.00389	0.0812	THBS1|14.4261563852;SERPINA7|2.25313591472;SERPINB10|20.0	3	369	16	295	http://www.ebi.ac.uk/QuickGO/GTerm?id=GO:0052547
5	5	regulation of antigen processing and presentation of peptide or polysaccharide antigen via MHC class II	GO:0002580	P	0.00442	0.0812	THBS1|14.4261563852	1	5	16	295	http://www.ebi.ac.uk/QuickGO/GTerm?id=GO:0002580
8	7,8	engulfment of apoptotic cell	GO:0043652	P	0.00442	0.0812	THBS1|14.4261563852	1	5	16	295	http://www.ebi.ac.uk/QuickGO/GTerm?id=GO:0043652
5	5	regulation of dendritic cell antigen processing and presentation	GO:0002604	P	0.00442	0.0812	THBS1|14.4261563852	1	5	16	295	http://www.ebi.ac.uk/QuickGO/GTerm?id=GO:0002604
8	8	negative regulation of plasminogen activation	GO:0010757	P	0.00442	0.0812	THBS1|14.4261563852	1	5	16	295	http://www.ebi.ac.uk/QuickGO/GTerm?id=GO:0010757
9	5,7,8,9	negative regulation of fatty acid transport	GO:2000192	P	0.00442	0.0812	THBS1|14.4261563852	1	5	16	295	http://www.ebi.ac.uk/QuickGO/GTerm?id=GO:2000192
4	4	negative regulation of antigen processing and presentation	GO:0002578	P	0.00442	0.0812	THBS1|14.4261563852	1	5	16	295	http://www.ebi.ac.uk/QuickGO/GTerm?id=GO:0002578
9	3,7,8,9	negative regulation of fibrinolysis	GO:0051918	P	0.00442	0.0812	THBS1|14.4261563852	1	5	16	295	http://www.ebi.ac.uk/QuickGO/GTerm?id=GO:0051918
6	6	response to magnesium ion	GO:0032026	P	0.00531	0.0847	THBS1|14.4261563852	1	6	16	295	http://www.ebi.ac.uk/QuickGO/GTerm?id=GO:0032026
4	4	dendritic cell antigen processing and presentation	GO:0002468	P	0.00531	0.0847	THBS1|14.4261563852	1	6	16	295	http://www.ebi.ac.uk/QuickGO/GTerm?id=GO:0002468
9	7,8,9	fatty acid transmembrane transport	GO:1902001	P	0.00531	0.0847	THBS1|14.4261563852	1	6	16	295	http://www.ebi.ac.uk/QuickGO/GTerm?id=GO:1902001
11	8,9,10,11	plasma membrane long-chain fatty acid transport	GO:0015911	P	0.00531	0.0847	THBS1|14.4261563852	1	6	16	295	http://www.ebi.ac.uk/QuickGO/GTerm?id=GO:0015911
5	5	intermediate filament bundle assembly	GO:0045110	P	0.00531	0.0847	KRT14|0.05	1	6	16	295	http://www.ebi.ac.uk/QuickGO/GTerm?id=GO:0045110
8	6,7,8	negative regulation of anion transmembrane transport	GO:1903960	P	0.00531	0.0847	THBS1|14.4261563852	1	6	16	295	http://www.ebi.ac.uk/QuickGO/GTerm?id=GO:1903960
7	6,7	thyroid hormone transport	GO:0070327	P	0.00619	0.0946	SERPINA7|2.25313591472	1	7	16	295	http://www.ebi.ac.uk/QuickGO/GTerm?id=GO:0070327
6	6	cellular response to nitric oxide	GO:0071732	P	0.00619	0.0946	THBS1|14.4261563852	1	7	16	295	http://www.ebi.ac.uk/QuickGO/GTerm?id=GO:0071732
6	6	cellular response to reactive nitrogen species	GO:1902170	P	0.00707	0.0972	THBS1|14.4261563852	1	8	16	295	http://www.ebi.ac.uk/QuickGO/GTerm?id=GO:1902170
8	6,7,8	positive regulation of fibroblast migration	GO:0010763	P	0.00707	0.0972	THBS1|14.4261563852	1	8	16	295	http://www.ebi.ac.uk/QuickGO/GTerm?id=GO:0010763
8	4,6,7,8	negative regulation of organic acid transport	GO:0032891	P	0.00707	0.0972	THBS1|14.4261563852	1	8	16	295	http://www.ebi.ac.uk/QuickGO/GTerm?id=GO:0032891
8	6,7,8	regulation of fibrinolysis	GO:0051917	P	0.00707	0.0972	THBS1|14.4261563852	1	8	16	295	http://www.ebi.ac.uk/QuickGO/GTerm?id=GO:0051917
5	5	inflammatory response	GO:0006954	P	0.0071	0.0972	LOC100630489|2.91652313698;THBS1|14.4261563852;FN1|3.32192007748	3	458	16	295	http://www.ebi.ac.uk/QuickGO/GTerm?id=GO:0006954
4	4	regulation of chemotaxis	GO:0050920	P	0.00733	0.0972	LOC100630489|2.91652313698;THBS1|14.4261563852	2	147	16	295	http://www.ebi.ac.uk/QuickGO/GTerm?id=GO:0050920
6	4,6	regulation of epithelial cell migration	GO:0010632	P	0.00733	0.0972	THBS1|14.4261563852;GLIPR2|20.0	2	147	16	295	http://www.ebi.ac.uk/QuickGO/GTerm?id=GO:0010632
4	3,4	regulation of behavior	GO:0050795	P	0.00772	0.0972	LOC100630489|2.91652313698;THBS1|14.4261563852	2	151	16	295	http://www.ebi.ac.uk/QuickGO/GTerm?id=GO:0050795
5	5	response to nitric oxide	GO:0071731	P	0.00795	0.0972	THBS1|14.4261563852	1	9	16	295	http://www.ebi.ac.uk/QuickGO/GTerm?id=GO:0071731
9	6,7,8,9	positive regulation of tumor necrosis factor biosynthetic process	GO:0042535	P	0.00795	0.0972	THBS1|14.4261563852	1	9	16	295	http://www.ebi.ac.uk/QuickGO/GTerm?id=GO:0042535
8	7,8	actin filament network formation	GO:0051639	P	0.00795	0.0972	LCP1|1.74267242192	1	9	16	295	http://www.ebi.ac.uk/QuickGO/GTerm?id=GO:0051639
8	7,8	cGMP-mediated signaling	GO:0019934	P	0.00795	0.0972	THBS1|14.4261563852	1	9	16	295	http://www.ebi.ac.uk/QuickGO/GTerm?id=GO:0019934
8	5,6,7,8	positive regulation of podosome assembly	GO:0071803	P	0.00883	0.105	LCP1|1.74267242192	1	10	16	295	http://www.ebi.ac.uk/QuickGO/GTerm?id=GO:0071803
8	8	regulation of plasminogen activation	GO:0010755	P	0.00883	0.105	THBS1|14.4261563852	1	10	16	295	http://www.ebi.ac.uk/QuickGO/GTerm?id=GO:0010755
9	8,9	positive regulation of endothelial cell apoptotic process	GO:2000353	P	0.00971	0.111	THBS1|14.4261563852	1	11	16	295	http://www.ebi.ac.uk/QuickGO/GTerm?id=GO:2000353
6	6	chronic inflammatory response	GO:0002544	P	0.00971	0.111	THBS1|14.4261563852	1	11	16	295	http://www.ebi.ac.uk/QuickGO/GTerm?id=GO:0002544
4	4	response to wounding	GO:0009611	P	0.0103	0.117	LOC100630489|2.91652313698;THBS1|14.4261563852;TREML1|20.0	3	525	16	295	http://www.ebi.ac.uk/QuickGO/GTerm?id=GO:0009611
8	7,8	actin crosslink formation	GO:0051764	P	0.0106	0.118	LCP1|1.74267242192	1	12	16	295	http://www.ebi.ac.uk/QuickGO/GTerm?id=GO:0051764
6	5,6	second-messenger-mediated signaling	GO:0019932	P	0.0109	0.119	THBS1|14.4261563852;TREML1|20.0	2	181	16	295	http://www.ebi.ac.uk/QuickGO/GTerm?id=GO:0019932
9	5,6,7,8,9	negative regulation of fibroblast growth factor receptor signaling pathway	GO:0040037	P	0.0115	0.119	THBS1|14.4261563852	1	13	16	295	http://www.ebi.ac.uk/QuickGO/GTerm?id=GO:0040037
6	5,6	positive regulation of macrophage activation	GO:0043032	P	0.0115	0.119	THBS1|14.4261563852	1	13	16	295	http://www.ebi.ac.uk/QuickGO/GTerm?id=GO:0043032
8	6,7,8	regulation of tumor necrosis factor biosynthetic process	GO:0042534	P	0.0123	0.119	THBS1|14.4261563852	1	14	16	295	http://www.ebi.ac.uk/QuickGO/GTerm?id=GO:0042534
4	4	regulation of antigen processing and presentation	GO:0002577	P	0.0123	0.119	THBS1|14.4261563852	1	14	16	295	http://www.ebi.ac.uk/QuickGO/GTerm?id=GO:0002577
8	5,6,7,8	regulation of podosome assembly	GO:0071801	P	0.0123	0.119	LCP1|1.74267242192	1	14	16	295	http://www.ebi.ac.uk/QuickGO/GTerm?id=GO:0071801
8	6,7,8	regulation of fatty acid transport	GO:2000191	P	0.0123	0.119	THBS1|14.4261563852	1	14	16	295	http://www.ebi.ac.uk/QuickGO/GTerm?id=GO:2000191
7	6,7	tumor necrosis factor biosynthetic process	GO:0042533	P	0.0123	0.119	THBS1|14.4261563852	1	14	16	295	http://www.ebi.ac.uk/QuickGO/GTerm?id=GO:0042533
4	4	cell migration	GO:0016477	P	0.0124	0.119	LOC100630489|2.91652313698;LCP1|1.74267242192;THBS1|14.4261563852;GLIPR2|20.0	4	1065	16	295	http://www.ebi.ac.uk/QuickGO/GTerm?id=GO:0016477
6	6	epithelial cell migration	GO:0010631	P	0.0125	0.119	THBS1|14.4261563852;GLIPR2|20.0	2	194	16	295	http://www.ebi.ac.uk/QuickGO/GTerm?id=GO:0010631
5	5	epithelium migration	GO:0090132	P	0.0127	0.119	THBS1|14.4261563852;GLIPR2|20.0	2	196	16	295	http://www.ebi.ac.uk/QuickGO/GTerm?id=GO:0090132
5	5	regulation of cell migration	GO:0030334	P	0.0131	0.119	LOC100630489|2.91652313698;THBS1|14.4261563852;GLIPR2|20.0	3	574	16	295	http://www.ebi.ac.uk/QuickGO/GTerm?id=GO:0030334
7	6,7	nitric oxide mediated signal transduction	GO:0007263	P	0.0132	0.119	THBS1|14.4261563852	1	15	16	295	http://www.ebi.ac.uk/QuickGO/GTerm?id=GO:0007263
8	7,8	positive regulation of epithelial cell apoptotic process	GO:1904037	P	0.0132	0.119	THBS1|14.4261563852	1	15	16	295	http://www.ebi.ac.uk/QuickGO/GTerm?id=GO:1904037
11	7,8,9,11	positive regulation of extrinsic apoptotic signaling pathway via death domain receptors	GO:1902043	P	0.0132	0.119	THBS1|14.4261563852	1	15	16	295	http://www.ebi.ac.uk/QuickGO/GTerm?id=GO:1902043
4	4	tissue migration	GO:0090130	P	0.0135	0.119	THBS1|14.4261563852;GLIPR2|20.0	2	202	16	295	http://www.ebi.ac.uk/QuickGO/GTerm?id=GO:0090130
6	5,6	mesenchyme development	GO:0060485	P	0.0139	0.119	THBS1|14.4261563852;GLIPR2|20.0	2	205	16	295	http://www.ebi.ac.uk/QuickGO/GTerm?id=GO:0060485
7	5,6,7	negative regulation of interleukin-12 production	GO:0032695	P	0.0141	0.119	THBS1|14.4261563852	1	16	16	295	http://www.ebi.ac.uk/QuickGO/GTerm?id=GO:0032695
10	5,8,9,10	growth plate cartilage development	GO:0003417	P	0.0141	0.119	THBS1|14.4261563852	1	16	16	295	http://www.ebi.ac.uk/QuickGO/GTerm?id=GO:0003417
5	5	regulation of endothelial cell chemotaxis	GO:2001026	P	0.0141	0.119	THBS1|14.4261563852	1	16	16	295	http://www.ebi.ac.uk/QuickGO/GTerm?id=GO:2001026
7	5,7	negative regulation of anion transport	GO:1903792	P	0.0141	0.119	THBS1|14.4261563852	1	16	16	295	http://www.ebi.ac.uk/QuickGO/GTerm?id=GO:1903792
4	4	regulation of cell motility	GO:2000145	P	0.0149	0.123	LOC100630489|2.91652313698;THBS1|14.4261563852;GLIPR2|20.0	3	602	16	295	http://www.ebi.ac.uk/QuickGO/GTerm?id=GO:2000145
6	4,6	ovulation	GO:0030728	P	0.015	0.123	LHB|20.0	1	17	16	295	http://www.ebi.ac.uk/QuickGO/GTerm?id=GO:0030728
6	4,6	positive regulation of cellular response to transforming growth factor beta stimulus	GO:1903846	P	0.0158	0.124	THBS1|14.4261563852	1	18	16	295	http://www.ebi.ac.uk/QuickGO/GTerm?id=GO:1903846
8	5,6,7,8	positive regulation of blood coagulation	GO:0030194	P	0.0158	0.124	THBS1|14.4261563852	1	18	16	295	http://www.ebi.ac.uk/QuickGO/GTerm?id=GO:0030194
4	4	positive regulation of hemostasis	GO:1900048	P	0.0158	0.124	THBS1|14.4261563852	1	18	16	295	http://www.ebi.ac.uk/QuickGO/GTerm?id=GO:1900048
8	5,6,7,8	positive regulation of transforming growth factor beta receptor signaling pathway	GO:0030511	P	0.0158	0.124	THBS1|14.4261563852	1	18	16	295	http://www.ebi.ac.uk/QuickGO/GTerm?id=GO:0030511
4	4	positive regulation of response to external stimulus	GO:0032103	P	0.0161	0.124	LOC100630489|2.91652313698;THBS1|14.4261563852	2	222	16	295	http://www.ebi.ac.uk/QuickGO/GTerm?id=GO:0032103
3	3	localization of cell	GO:0051674	P	0.0162	0.124	LOC100630489|2.91652313698;LCP1|1.74267242192;THBS1|14.4261563852;GLIPR2|20.0	4	1153	16	295	http://www.ebi.ac.uk/QuickGO/GTerm?id=GO:0051674
3	3	cell motility	GO:0048870	P	0.0162	0.124	LOC100630489|2.91652313698;LCP1|1.74267242192;THBS1|14.4261563852;GLIPR2|20.0	4	1153	16	295	http://www.ebi.ac.uk/QuickGO/GTerm?id=GO:0048870
4	4	negative regulation of lipid transport	GO:0032369	P	0.0167	0.124	THBS1|14.4261563852	1	19	16	295	http://www.ebi.ac.uk/QuickGO/GTerm?id=GO:0032369
7	6,7	intermediate filament organization	GO:0045109	P	0.0167	0.124	KRT14|0.05	1	19	16	295	http://www.ebi.ac.uk/QuickGO/GTerm?id=GO:0045109
9	6,7,8,9	fibrinolysis	GO:0042730	P	0.0167	0.124	THBS1|14.4261563852	1	19	16	295	http://www.ebi.ac.uk/QuickGO/GTerm?id=GO:0042730
5	5	cell chemotaxis	GO:0060326	P	0.0172	0.124	LOC100630489|2.91652313698;THBS1|14.4261563852	2	230	16	295	http://www.ebi.ac.uk/QuickGO/GTerm?id=GO:0060326
7	6,7	regulation of fibroblast migration	GO:0010762	P	0.0176	0.124	THBS1|14.4261563852	1	20	16	295	http://www.ebi.ac.uk/QuickGO/GTerm?id=GO:0010762
7	6,7	podosome assembly	GO:0071800	P	0.0176	0.124	LCP1|1.74267242192	1	20	16	295	http://www.ebi.ac.uk/QuickGO/GTerm?id=GO:0071800
4	4	positive regulation of coagulation	GO:0050820	P	0.0176	0.124	THBS1|14.4261563852	1	20	16	295	http://www.ebi.ac.uk/QuickGO/GTerm?id=GO:0050820
10	6,7,9,10	negative regulation of blood vessel endothelial cell migration	GO:0043537	P	0.0176	0.124	THBS1|14.4261563852	1	20	16	295	http://www.ebi.ac.uk/QuickGO/GTerm?id=GO:0043537
7	5,7	defense response to protozoan	GO:0042832	P	0.0185	0.127	LOC100630489|2.91652313698	1	21	16	295	http://www.ebi.ac.uk/QuickGO/GTerm?id=GO:0042832
7	6,7	endochondral bone growth	GO:0003416	P	0.0185	0.127	THBS1|14.4261563852	1	21	16	295	http://www.ebi.ac.uk/QuickGO/GTerm?id=GO:0003416
3	3	regulation of locomotion	GO:0040012	P	0.0185	0.127	LOC100630489|2.91652313698;THBS1|14.4261563852;GLIPR2|20.0	3	652	16	295	http://www.ebi.ac.uk/QuickGO/GTerm?id=GO:0040012
5	5	regulation of epithelial cell proliferation	GO:0050678	P	0.0193	0.127	THBS1|14.4261563852;GRN|20.0	2	244	16	295	http://www.ebi.ac.uk/QuickGO/GTerm?id=GO:0050678
10	6,7,9,10	positive regulation of blood vessel endothelial cell migration	GO:0043536	P	0.0193	0.127	THBS1|14.4261563852	1	22	16	295	http://www.ebi.ac.uk/QuickGO/GTerm?id=GO:0043536
6	6	modified amino acid transport	GO:0072337	P	0.0193	0.127	SERPINA7|2.25313591472	1	22	16	295	http://www.ebi.ac.uk/QuickGO/GTerm?id=GO:0072337
8	8	plasminogen activation	GO:0031639	P	0.0193	0.127	THBS1|14.4261563852	1	22	16	295	http://www.ebi.ac.uk/QuickGO/GTerm?id=GO:0031639
4	4	regulation of response to external stimulus	GO:0032101	P	0.0196	0.127	LOC100630489|2.91652313698;THBS1|14.4261563852;SERPINB10|20.0	3	667	16	295	http://www.ebi.ac.uk/QuickGO/GTerm?id=GO:0032101
4	4	regulation of cellular component movement	GO:0051270	P	0.0197	0.127	LOC100630489|2.91652313698;THBS1|14.4261563852;GLIPR2|20.0	3	668	16	295	http://www.ebi.ac.uk/QuickGO/GTerm?id=GO:0051270
6	6	regulation of proteolysis	GO:0030162	P	0.0199	0.127	THBS1|14.4261563852;SERPINA7|2.25313591472;SERPINB10|20.0	3	670	16	295	http://www.ebi.ac.uk/QuickGO/GTerm?id=GO:0030162
5	5	negative regulation of catalytic activity	GO:0043086	P	0.0199	0.127	THBS1|14.4261563852;SERPINA7|2.25313591472;SERPINB10|20.0	3	671	16	295	http://www.ebi.ac.uk/QuickGO/GTerm?id=GO:0043086
8	6,8	endothelial cell chemotaxis	GO:0035767	P	0.0202	0.127	THBS1|14.4261563852	1	23	16	295	http://www.ebi.ac.uk/QuickGO/GTerm?id=GO:0035767
6	5,6	regulation of fibroblast growth factor receptor signaling pathway	GO:0040036	P	0.0202	0.127	THBS1|14.4261563852	1	23	16	295	http://www.ebi.ac.uk/QuickGO/GTerm?id=GO:0040036
8	6,8	positive regulation of neutrophil chemotaxis	GO:0090023	P	0.0211	0.128	LOC100630489|2.91652313698	1	24	16	295	http://www.ebi.ac.uk/QuickGO/GTerm?id=GO:0090023
6	4,6	response to protozoan	GO:0001562	P	0.0211	0.128	LOC100630489|2.91652313698	1	24	16	295	http://www.ebi.ac.uk/QuickGO/GTerm?id=GO:0001562
7	5,6,7	regulation of organic acid transport	GO:0032890	P	0.0211	0.128	THBS1|14.4261563852	1	24	16	295	http://www.ebi.ac.uk/QuickGO/GTerm?id=GO:0032890
6	6	negative regulation of cell-matrix adhesion	GO:0001953	P	0.0219	0.128	THBS1|14.4261563852	1	25	16	295	http://www.ebi.ac.uk/QuickGO/GTerm?id=GO:0001953
6	5,6	regulation of macrophage activation	GO:0043030	P	0.0219	0.128	THBS1|14.4261563852	1	25	16	295	http://www.ebi.ac.uk/QuickGO/GTerm?id=GO:0043030
7	6,7	positive regulation of granulocyte chemotaxis	GO:0071624	P	0.0219	0.128	LOC100630489|2.91652313698	1	25	16	295	http://www.ebi.ac.uk/QuickGO/GTerm?id=GO:0071624
8	8	regulation of cGMP metabolic process	GO:0030823	P	0.0219	0.128	THBS1|14.4261563852	1	25	16	295	http://www.ebi.ac.uk/QuickGO/GTerm?id=GO:0030823
7	7	negative regulation of protein processing	GO:0010955	P	0.0219	0.128	THBS1|14.4261563852	1	25	16	295	http://www.ebi.ac.uk/QuickGO/GTerm?id=GO:0010955
7	6,7	negative regulation of protein maturation	GO:1903318	P	0.0219	0.128	THBS1|14.4261563852	1	25	16	295	http://www.ebi.ac.uk/QuickGO/GTerm?id=GO:1903318
7	5,7	positive regulation of neutrophil migration	GO:1902624	P	0.0228	0.13	LOC100630489|2.91652313698	1	26	16	295	http://www.ebi.ac.uk/QuickGO/GTerm?id=GO:1902624
7	6,7	apoptotic cell clearance	GO:0043277	P	0.0228	0.13	THBS1|14.4261563852	1	26	16	295	http://www.ebi.ac.uk/QuickGO/GTerm?id=GO:0043277
3	3	negative regulation of behavior	GO:0048521	P	0.0228	0.13	THBS1|14.4261563852	1	26	16	295	http://www.ebi.ac.uk/QuickGO/GTerm?id=GO:0048521
5	5	ameboidal-type cell migration	GO:0001667	P	0.0234	0.132	THBS1|14.4261563852;GLIPR2|20.0	2	271	16	295	http://www.ebi.ac.uk/QuickGO/GTerm?id=GO:0001667
4	4	antigen processing and presentation of peptide or polysaccharide antigen via MHC class II	GO:0002504	P	0.0237	0.132	THBS1|14.4261563852	1	27	16	295	http://www.ebi.ac.uk/QuickGO/GTerm?id=GO:0002504
6	5,6	extracellular matrix disassembly	GO:0022617	P	0.0237	0.132	LCP1|1.74267242192	1	27	16	295	http://www.ebi.ac.uk/QuickGO/GTerm?id=GO:0022617
7	7	peptide cross-linking	GO:0018149	P	0.0245	0.132	THBS1|14.4261563852	1	28	16	295	http://www.ebi.ac.uk/QuickGO/GTerm?id=GO:0018149
8	7,8	regulation of anion transmembrane transport	GO:1903959	P	0.0245	0.132	THBS1|14.4261563852	1	28	16	295	http://www.ebi.ac.uk/QuickGO/GTerm?id=GO:1903959
5	4,5	negative regulation of chemotaxis	GO:0050922	P	0.0245	0.132	THBS1|14.4261563852	1	28	16	295	http://www.ebi.ac.uk/QuickGO/GTerm?id=GO:0050922
6	5,6	positive regulation of smooth muscle cell proliferation	GO:0048661	P	0.0245	0.132	THBS1|14.4261563852	1	28	16	295	http://www.ebi.ac.uk/QuickGO/GTerm?id=GO:0048661
9	4,7,8,9	cartilage development involved in endochondral bone morphogenesis	GO:0060351	P	0.0254	0.133	THBS1|14.4261563852	1	29	16	295	http://www.ebi.ac.uk/QuickGO/GTerm?id=GO:0060351
7	6,7	regulation of neutrophil chemotaxis	GO:0090022	P	0.0254	0.133	LOC100630489|2.91652313698	1	29	16	295	http://www.ebi.ac.uk/QuickGO/GTerm?id=GO:0090022
6	6	fibroblast migration	GO:0010761	P	0.0254	0.133	THBS1|14.4261563852	1	29	16	295	http://www.ebi.ac.uk/QuickGO/GTerm?id=GO:0010761
5	5	membrane invagination	GO:0010324	P	0.0254	0.133	THBS1|14.4261563852	1	29	16	295	http://www.ebi.ac.uk/QuickGO/GTerm?id=GO:0010324
4	4	epithelial cell proliferation	GO:0050673	P	0.0273	0.142	THBS1|14.4261563852;GRN|20.0	2	294	16	295	http://www.ebi.ac.uk/QuickGO/GTerm?id=GO:0050673
7	5,7	regulation of neutrophil migration	GO:1902622	P	0.028	0.143	LOC100630489|2.91652313698	1	32	16	295	http://www.ebi.ac.uk/QuickGO/GTerm?id=GO:1902622
6	5,6	intermediate filament cytoskeleton organization	GO:0045104	P	0.028	0.143	KRT14|0.05	1	32	16	295	http://www.ebi.ac.uk/QuickGO/GTerm?id=GO:0045104
6	5,6	protein kinase A signaling	GO:0010737	P	0.028	0.143	LCP1|1.74267242192	1	32	16	295	http://www.ebi.ac.uk/QuickGO/GTerm?id=GO:0010737
2	2	locomotion	GO:0040011	P	0.0283	0.143	LOC100630489|2.91652313698;LCP1|1.74267242192;THBS1|14.4261563852;GLIPR2|20.0	4	1363	16	295	http://www.ebi.ac.uk/QuickGO/GTerm?id=GO:0040011
6	6	negative regulation of endothelial cell proliferation	GO:0001937	P	0.0289	0.143	THBS1|14.4261563852	1	33	16	295	http://www.ebi.ac.uk/QuickGO/GTerm?id=GO:0001937
6	4,5,6	positive regulation of epithelial to mesenchymal transition	GO:0010718	P	0.0289	0.143	GLIPR2|20.0	1	33	16	295	http://www.ebi.ac.uk/QuickGO/GTerm?id=GO:0010718
4	4	intermediate filament-based process	GO:0045103	P	0.0289	0.143	KRT14|0.05	1	33	16	295	http://www.ebi.ac.uk/QuickGO/GTerm?id=GO:0045103
5	5	endocardial cushion development	GO:0003197	P	0.0306	0.149	THBS1|14.4261563852	1	35	16	295	http://www.ebi.ac.uk/QuickGO/GTerm?id=GO:0003197
9	8,9	regulation of endothelial cell apoptotic process	GO:2000351	P	0.0306	0.149	THBS1|14.4261563852	1	35	16	295	http://www.ebi.ac.uk/QuickGO/GTerm?id=GO:2000351
7	7	acute-phase response	GO:0006953	P	0.0306	0.149	FN1|3.32192007748	1	35	16	295	http://www.ebi.ac.uk/QuickGO/GTerm?id=GO:0006953
4	4	regulation of anatomical structure morphogenesis	GO:0022603	P	0.0309	0.149	THBS1|14.4261563852;FN1|3.32192007748;GLIPR2|20.0	3	794	16	295	http://www.ebi.ac.uk/QuickGO/GTerm?id=GO:0022603
7	5,7	positive regulation of wound healing	GO:0090303	P	0.0314	0.15	THBS1|14.4261563852	1	36	16	295	http://www.ebi.ac.uk/QuickGO/GTerm?id=GO:0090303
8	5,6,8	negative regulation of endothelial cell migration	GO:0010596	P	0.0314	0.15	THBS1|14.4261563852	1	36	16	295	http://www.ebi.ac.uk/QuickGO/GTerm?id=GO:0010596
6	5,6	negative regulation of cell-substrate adhesion	GO:0010812	P	0.0332	0.155	THBS1|14.4261563852	1	38	16	295	http://www.ebi.ac.uk/QuickGO/GTerm?id=GO:0010812
7	4,5,7	negative regulation of hemostasis	GO:1900047	P	0.0332	0.155	THBS1|14.4261563852	1	38	16	295	http://www.ebi.ac.uk/QuickGO/GTerm?id=GO:1900047
8	5,6,7,8	negative regulation of blood coagulation	GO:0030195	P	0.0332	0.155	THBS1|14.4261563852	1	38	16	295	http://www.ebi.ac.uk/QuickGO/GTerm?id=GO:0030195
8	8	endothelial cell apoptotic process	GO:0072577	P	0.034	0.158	THBS1|14.4261563852	1	39	16	295	http://www.ebi.ac.uk/QuickGO/GTerm?id=GO:0072577
7	6,7	cyclic-nucleotide-mediated signaling	GO:0019935	P	0.0349	0.16	THBS1|14.4261563852	1	40	16	295	http://www.ebi.ac.uk/QuickGO/GTerm?id=GO:0019935
5	5	macrophage activation	GO:0042116	P	0.0349	0.16	THBS1|14.4261563852	1	40	16	295	http://www.ebi.ac.uk/QuickGO/GTerm?id=GO:0042116
6	6	regulation of granulocyte chemotaxis	GO:0071622	P	0.0357	0.161	LOC100630489|2.91652313698	1	41	16	295	http://www.ebi.ac.uk/QuickGO/GTerm?id=GO:0071622
4	4	negative regulation of coagulation	GO:0050819	P	0.0357	0.161	THBS1|14.4261563852	1	41	16	295	http://www.ebi.ac.uk/QuickGO/GTerm?id=GO:0050819
5	4,5	embryo implantation	GO:0007566	P	0.0357	0.161	GRN|20.0	1	41	16	295	http://www.ebi.ac.uk/QuickGO/GTerm?id=GO:0007566
10	7,8,10	regulation of extrinsic apoptotic signaling pathway via death domain receptors	GO:1902041	P	0.0366	0.164	THBS1|14.4261563852	1	42	16	295	http://www.ebi.ac.uk/QuickGO/GTerm?id=GO:1902041
10	7,8,9,10	long-chain fatty acid transport	GO:0015909	P	0.0383	0.17	THBS1|14.4261563852	1	44	16	295	http://www.ebi.ac.uk/QuickGO/GTerm?id=GO:0015909
9	6,8,9	regulation of blood vessel endothelial cell migration	GO:0043535	P	0.0392	0.172	THBS1|14.4261563852	1	45	16	295	http://www.ebi.ac.uk/QuickGO/GTerm?id=GO:0043535
6	5,6	positive regulation of stem cell differentiation	GO:2000738	P	0.0392	0.172	GLIPR2|20.0	1	45	16	295	http://www.ebi.ac.uk/QuickGO/GTerm?id=GO:2000738
6	5,6	regulation of interleukin-12 production	GO:0032655	P	0.04	0.175	THBS1|14.4261563852	1	46	16	295	http://www.ebi.ac.uk/QuickGO/GTerm?id=GO:0032655
4	4	movement of cell or subcellular component	GO:0006928	P	0.0405	0.175	LOC100630489|2.91652313698;LCP1|1.74267242192;THBS1|14.4261563852;GLIPR2|20.0	4	1525	16	295	http://www.ebi.ac.uk/QuickGO/GTerm?id=GO:0006928
7	6,7	phagocytosis, engulfment	GO:0006911	P	0.0409	0.175	THBS1|14.4261563852	1	47	16	295	http://www.ebi.ac.uk/QuickGO/GTerm?id=GO:0006911
8	7,8	regulation of epithelial cell apoptotic process	GO:1904035	P	0.0409	0.175	THBS1|14.4261563852	1	47	16	295	http://www.ebi.ac.uk/QuickGO/GTerm?id=GO:1904035
6	5,6	negative regulation of cellular protein metabolic process	GO:0032269	P	0.0416	0.177	THBS1|14.4261563852;SERPINA7|2.25313591472;SERPINB10|20.0	3	892	16	295	http://www.ebi.ac.uk/QuickGO/GTerm?id=GO:0032269
7	5,7	negative regulation of wound healing	GO:0061045	P	0.0417	0.177	THBS1|14.4261563852	1	48	16	295	http://www.ebi.ac.uk/QuickGO/GTerm?id=GO:0061045
4	4	negative regulation of molecular function	GO:0044092	P	0.0424	0.177	THBS1|14.4261563852;SERPINA7|2.25313591472;SERPINB10|20.0	3	899	16	295	http://www.ebi.ac.uk/QuickGO/GTerm?id=GO:0044092
6	5,6	positive regulation of tumor necrosis factor superfamily cytokine production	GO:1903557	P	0.0426	0.177	THBS1|14.4261563852	1	49	16	295	http://www.ebi.ac.uk/QuickGO/GTerm?id=GO:1903557
5	5	interleukin-12 production	GO:0032615	P	0.0426	0.177	THBS1|14.4261563852	1	49	16	295	http://www.ebi.ac.uk/QuickGO/GTerm?id=GO:0032615
8	6,7,8	positive regulation of tumor necrosis factor production	GO:0032760	P	0.0426	0.177	THBS1|14.4261563852	1	49	16	295	http://www.ebi.ac.uk/QuickGO/GTerm?id=GO:0032760
6	5,6	positive regulation of cytokine biosynthetic process	GO:0042108	P	0.0434	0.179	THBS1|14.4261563852	1	50	16	295	http://www.ebi.ac.uk/QuickGO/GTerm?id=GO:0042108
9	6,7,8,9	positive regulation of extrinsic apoptotic signaling pathway	GO:2001238	P	0.0443	0.18	THBS1|14.4261563852	1	51	16	295	http://www.ebi.ac.uk/QuickGO/GTerm?id=GO:2001238
6	4,6	negative regulation of epithelial cell migration	GO:0010633	P	0.0443	0.18	THBS1|14.4261563852	1	51	16	295	http://www.ebi.ac.uk/QuickGO/GTerm?id=GO:0010633
6	4,5,6	positive regulation of organelle assembly	GO:1902117	P	0.0443	0.18	LCP1|1.74267242192	1	51	16	295	http://www.ebi.ac.uk/QuickGO/GTerm?id=GO:1902117
4	4	tissue development	GO:0009888	P	0.0446	0.18	THBS1|14.4261563852;TAGLN2|20.0;GLIPR2|20.0;KRT14|0.05	4	1572	16	295	http://www.ebi.ac.uk/QuickGO/GTerm?id=GO:0009888
7	7	regulation of protein processing	GO:0070613	P	0.0451	0.181	THBS1|14.4261563852	1	52	16	295	http://www.ebi.ac.uk/QuickGO/GTerm?id=GO:0070613
5	5	sprouting angiogenesis	GO:0002040	P	0.046	0.182	THBS1|14.4261563852	1	53	16	295	http://www.ebi.ac.uk/QuickGO/GTerm?id=GO:0002040
6	6	regulation of protein maturation	GO:1903317	P	0.046	0.182	THBS1|14.4261563852	1	53	16	295	http://www.ebi.ac.uk/QuickGO/GTerm?id=GO:1903317
8	8	cGMP metabolic process	GO:0046068	P	0.0468	0.184	THBS1|14.4261563852	1	54	16	295	http://www.ebi.ac.uk/QuickGO/GTerm?id=GO:0046068
5	5	regulation of smooth muscle cell proliferation	GO:0048660	P	0.0468	0.184	THBS1|14.4261563852	1	54	16	295	http://www.ebi.ac.uk/QuickGO/GTerm?id=GO:0048660
4	4	cellular component disassembly	GO:0022411	P	0.0472	0.184	LCP1|1.74267242192;SERPINB10|20.0	2	397	16	295	http://www.ebi.ac.uk/QuickGO/GTerm?id=GO:0022411
8	5,7,8	positive regulation of endothelial cell migration	GO:0010595	P	0.0477	0.184	THBS1|14.4261563852	1	55	16	295	http://www.ebi.ac.uk/QuickGO/GTerm?id=GO:0010595
7	5,6,7	positive regulation of reactive oxygen species metabolic process	GO:2000379	P	0.0477	0.184	THBS1|14.4261563852	1	55	16	295	http://www.ebi.ac.uk/QuickGO/GTerm?id=GO:2000379
5	5	negative regulation of protein metabolic process	GO:0051248	P	0.0487	0.186	THBS1|14.4261563852;SERPINA7|2.25313591472;SERPINB10|20.0	3	950	16	295	http://www.ebi.ac.uk/QuickGO/GTerm?id=GO:0051248
7	5,6,7	negative regulation of ion transmembrane transport	GO:0034766	P	0.0494	0.186	THBS1|14.4261563852	1	57	16	295	http://www.ebi.ac.uk/QuickGO/GTerm?id=GO:0034766
8	6,7,8	endochondral bone morphogenesis	GO:0060350	P	0.0494	0.186	THBS1|14.4261563852	1	57	16	295	http://www.ebi.ac.uk/QuickGO/GTerm?id=GO:0060350
5	5	smooth muscle cell proliferation	GO:0048659	P	0.0494	0.186	THBS1|14.4261563852	1	57	16	295	http://www.ebi.ac.uk/QuickGO/GTerm?id=GO:0048659
6	4,6	outflow tract morphogenesis	GO:0003151	P	0.0494	0.186	THBS1|14.4261563852	1	57	16	295	http://www.ebi.ac.uk/QuickGO/GTerm?id=GO:0003151
8	6,7,8	positive regulation of MAPK cascade	GO:0043410	P	0.0498	0.187	THBS1|14.4261563852;GLIPR2|20.0	2	409	16	295	http://www.ebi.ac.uk/QuickGO/GTerm?id=GO:0043410
2	2	extracellular region	GO:0005576	C	4.42e-12	3.89e-10	LOC100630489|2.91652313698;LCP1|1.74267242192;PEPD|1.52873541741;THBS1|14.4261563852;SERPINA7|2.25313591472;GOLM1|1.87443680948;FN1|3.32192007748;LHB|20.0;BPIFA2|0.277269049644;SERPINB10|20.0;TAGLN2|20.0;CAPNS1|20.0;GLIPR2|20.0;EFEMP2|20.0;HGFAC|20.0;GRN|20.0;FGL1|20.0;KRT14|0.05	18	3706	19	295	http://www.ebi.ac.uk/QuickGO/GTerm?id=GO:0005576
2	2	extracellular region part	GO:0044421	C	4.26e-11	1.88e-09	LOC100630489|2.91652313698;LCP1|1.74267242192;PEPD|1.52873541741;THBS1|14.4261563852;SERPINA7|2.25313591472;GOLM1|1.87443680948;FN1|3.32192007748;LHB|20.0;BPIFA2|0.277269049644;SERPINB10|20.0;TAGLN2|20.0;CAPNS1|20.0;GLIPR2|20.0;EFEMP2|20.0;GRN|20.0;FGL1|20.0;KRT14|0.05	17	3421	19	295	http://www.ebi.ac.uk/QuickGO/GTerm?id=GO:0044421
5	5	membrane-bounded vesicle	GO:0031988	C	1.27e-08	3.43e-07	LCP1|1.74267242192;PEPD|1.52873541741;THBS1|14.4261563852;SERPINA7|2.25313591472;GOLM1|1.87443680948;BPIFA2|0.277269049644;TAGLN2|20.0;TREML1|20.0;CAPNS1|20.0;GLIPR2|20.0;EFEMP2|20.0;GRN|20.0;FGL1|20.0;KRT14|0.05	14	2717	19	295	http://www.ebi.ac.uk/QuickGO/GTerm?id=GO:0031988
4	4	extracellular membrane-bounded organelle	GO:0065010	C	1.83e-08	3.43e-07	LCP1|1.74267242192;PEPD|1.52873541741;THBS1|14.4261563852;SERPINA7|2.25313591472;GOLM1|1.87443680948;BPIFA2|0.277269049644;TAGLN2|20.0;CAPNS1|20.0;GLIPR2|20.0;EFEMP2|20.0;GRN|20.0;FGL1|20.0;KRT14|0.05	13	2258	19	295	http://www.ebi.ac.uk/QuickGO/GTerm?id=GO:0065010
4	4	extracellular exosome	GO:0070062	C	2.54e-08	3.43e-07	LCP1|1.74267242192;PEPD|1.52873541741;THBS1|14.4261563852;SERPINA7|2.25313591472;GOLM1|1.87443680948;BPIFA2|0.277269049644;TAGLN2|20.0;CAPNS1|20.0;GLIPR2|20.0;EFEMP2|20.0;GRN|20.0;FGL1|20.0;KRT14|0.05	13	2319	19	295	http://www.ebi.ac.uk/QuickGO/GTerm?id=GO:0070062
3	3	extracellular vesicle	GO:1903561	C	2.72e-08	3.43e-07	LCP1|1.74267242192;PEPD|1.52873541741;THBS1|14.4261563852;SERPINA7|2.25313591472;GOLM1|1.87443680948;BPIFA2|0.277269049644;TAGLN2|20.0;CAPNS1|20.0;GLIPR2|20.0;EFEMP2|20.0;GRN|20.0;FGL1|20.0;KRT14|0.05	13	2332	19	295	http://www.ebi.ac.uk/QuickGO/GTerm?id=GO:1903561
3	3	extracellular organelle	GO:0043230	C	2.73e-08	3.43e-07	LCP1|1.74267242192;PEPD|1.52873541741;THBS1|14.4261563852;SERPINA7|2.25313591472;GOLM1|1.87443680948;BPIFA2|0.277269049644;TAGLN2|20.0;CAPNS1|20.0;GLIPR2|20.0;EFEMP2|20.0;GRN|20.0;FGL1|20.0;KRT14|0.05	13	2333	19	295	http://www.ebi.ac.uk/QuickGO/GTerm?id=GO:0043230
4	4	vesicle	GO:0031982	C	8.75e-08	9.63e-07	LCP1|1.74267242192;PEPD|1.52873541741;THBS1|14.4261563852;SERPINA7|2.25313591472;GOLM1|1.87443680948;BPIFA2|0.277269049644;TAGLN2|20.0;TREML1|20.0;CAPNS1|20.0;GLIPR2|20.0;EFEMP2|20.0;GRN|20.0;FGL1|20.0;KRT14|0.05	14	3147	19	295	http://www.ebi.ac.uk/QuickGO/GTerm?id=GO:0031982
3	3	extracellular space	GO:0005615	C	2.33e-05	0.000228	LOC100630489|2.91652313698;LCP1|1.74267242192;THBS1|14.4261563852;SERPINA7|2.25313591472;GOLM1|1.87443680948;LHB|20.0;SERPINB10|20.0;GRN|20.0	8	1305	19	295	http://www.ebi.ac.uk/QuickGO/GTerm?id=GO:0005615
5	5	platelet alpha granule	GO:0031091	C	0.00012	0.00106	THBS1|14.4261563852;TREML1|20.0	2	16	19	295	http://www.ebi.ac.uk/QuickGO/GTerm?id=GO:0031091
3	3	membrane-bounded organelle	GO:0043227	C	0.00712	0.0528	LCP1|1.74267242192;PEPD|1.52873541741;THBS1|14.4261563852;SERPINA7|2.25313591472;GOLM1|1.87443680948;BPIFA2|0.277269049644;SERPINB10|20.0;TAGLN2|20.0;TREML1|20.0;CAPNS1|20.0;GLIPR2|20.0;EFEMP2|20.0;HGFAC|20.0;GRN|20.0;FGL1|20.0;KRT14|0.05	16	10060	19	295	http://www.ebi.ac.uk/QuickGO/GTerm?id=GO:0043227
4	3,4	fibrinogen complex	GO:0005577	C	0.00721	0.0528	THBS1|14.4261563852	1	7	19	295	http://www.ebi.ac.uk/QuickGO/GTerm?id=GO:0005577
4	4	phagocytic cup	GO:0001891	C	0.0133	0.0903	LCP1|1.74267242192	1	13	19	295	http://www.ebi.ac.uk/QuickGO/GTerm?id=GO:0001891
4	4	podosome	GO:0002102	C	0.0194	0.122	LCP1|1.74267242192	1	19	19	295	http://www.ebi.ac.uk/QuickGO/GTerm?id=GO:0002102
4	4	secretory granule	GO:0030141	C	0.0209	0.123	THBS1|14.4261563852;TREML1|20.0	2	218	19	295	http://www.ebi.ac.uk/QuickGO/GTerm?id=GO:0030141
2	2	organelle	GO:0043226	C	0.0251	0.138	LCP1|1.74267242192;PEPD|1.52873541741;THBS1|14.4261563852;SERPINA7|2.25313591472;GOLM1|1.87443680948;BPIFA2|0.277269049644;SERPINB10|20.0;TAGLN2|20.0;TREML1|20.0;CAPNS1|20.0;GLIPR2|20.0;EFEMP2|20.0;HGFAC|20.0;GRN|20.0;FGL1|20.0;KRT14|0.05	16	11126	19	295	http://www.ebi.ac.uk/QuickGO/GTerm?id=GO:0043226
7	5,6,7	rough endoplasmic reticulum	GO:0005791	C	0.0305	0.158	HGFAC|20.0	1	30	19	295	http://www.ebi.ac.uk/QuickGO/GTerm?id=GO:0005791
6	6	secretory vesicle	GO:0099503	C	0.0346	0.169	THBS1|14.4261563852;TREML1|20.0	2	286	19	295	http://www.ebi.ac.uk/QuickGO/GTerm?id=GO:0099503
3	3	basal part of cell	GO:0045178	C	0.0375	0.174	KRT14|0.05	1	37	19	295	http://www.ebi.ac.uk/QuickGO/GTerm?id=GO:0045178
9	6,7,8,9	contractile actin filament bundle	GO:0097517	C	0.0415	0.183	LCP1|1.74267242192	1	41	19	295	http://www.ebi.ac.uk/QuickGO/GTerm?id=GO:0097517
10	6,7,8,9,10	stress fiber	GO:0001725	C	0.0494	0.207	LCP1|1.74267242192	1	49	19	295	http://www.ebi.ac.uk/QuickGO/GTerm?id=GO:0001725
5	4,5	heparin binding	GO:0008201	F	0.000135	0.0112	LOC100630489|2.91652313698;THBS1|14.4261563852;FN1|3.32192007748	3	110	16	295	http://www.ebi.ac.uk/QuickGO/GTerm?id=GO:0008201
4	4	glycosaminoglycan binding	GO:0005539	F	0.00037	0.0114	LOC100630489|2.91652313698;THBS1|14.4261563852;FN1|3.32192007748	3	155	16	295	http://www.ebi.ac.uk/QuickGO/GTerm?id=GO:0005539
3	3	sulfur compound binding	GO:1901681	F	0.000414	0.0114	LOC100630489|2.91652313698;THBS1|14.4261563852;FN1|3.32192007748	3	161	16	295	http://www.ebi.ac.uk/QuickGO/GTerm?id=GO:1901681
6	6	keratin filament binding	GO:1990254	F	0.00279	0.0376	KRT14|0.05	1	3	16	295	http://www.ebi.ac.uk/QuickGO/GTerm?id=GO:1990254
6	6	collagen V binding	GO:0070052	F	0.00279	0.0376	THBS1|14.4261563852	1	3	16	295	http://www.ebi.ac.uk/QuickGO/GTerm?id=GO:0070052
5	5	fibrinogen binding	GO:0070051	F	0.00279	0.0376	THBS1|14.4261563852	1	3	16	295	http://www.ebi.ac.uk/QuickGO/GTerm?id=GO:0070051
7	7	serine-type endopeptidase inhibitor activity	GO:0004867	F	0.00317	0.0376	SERPINA7|2.25313591472;SERPINB10|20.0	2	91	16	295	http://www.ebi.ac.uk/QuickGO/GTerm?id=GO:0004867
6	6	calcium ion binding	GO:0005509	F	0.00437	0.0453	LCP1|1.74267242192;THBS1|14.4261563852;CAPNS1|20.0;EFEMP2|20.0	4	753	16	295	http://www.ebi.ac.uk/QuickGO/GTerm?id=GO:0005509
4	4	protein complex binding	GO:0032403	F	0.00613	0.0565	LCP1|1.74267242192;THBS1|14.4261563852;TAGLN2|20.0;KRT14|0.05	4	828	16	295	http://www.ebi.ac.uk/QuickGO/GTerm?id=GO:0032403
5	5	intermediate filament binding	GO:0019215	F	0.00743	0.0617	KRT14|0.05	1	8	16	295	http://www.ebi.ac.uk/QuickGO/GTerm?id=GO:0019215
6	5,6	actin filament binding	GO:0051015	F	0.00916	0.0691	LCP1|1.74267242192;TAGLN2|20.0	2	157	16	295	http://www.ebi.ac.uk/QuickGO/GTerm?id=GO:0051015
6	6	endopeptidase inhibitor activity	GO:0004866	F	0.0108	0.0717	SERPINA7|2.25313591472;SERPINB10|20.0	2	171	16	295	http://www.ebi.ac.uk/QuickGO/GTerm?id=GO:0004866
5	5	endopeptidase regulator activity	GO:0061135	F	0.0116	0.0717	SERPINA7|2.25313591472;SERPINB10|20.0	2	178	16	295	http://www.ebi.ac.uk/QuickGO/GTerm?id=GO:0061135
5	5	peptidase inhibitor activity	GO:0030414	F	0.0123	0.0717	SERPINA7|2.25313591472;SERPINB10|20.0	2	183	16	295	http://www.ebi.ac.uk/QuickGO/GTerm?id=GO:0030414
6	6	low-density lipoprotein particle binding	GO:0030169	F	0.013	0.0717	THBS1|14.4261563852	1	14	16	295	http://www.ebi.ac.uk/QuickGO/GTerm?id=GO:0030169
7	7	CXCR chemokine receptor binding	GO:0045236	F	0.0148	0.0748	LOC100630489|2.91652313698	1	16	16	295	http://www.ebi.ac.uk/QuickGO/GTerm?id=GO:0045236
4	4	peptidase regulator activity	GO:0061134	F	0.0159	0.0748	SERPINA7|2.25313591472;SERPINB10|20.0	2	210	16	295	http://www.ebi.ac.uk/QuickGO/GTerm?id=GO:0061134
5	5	fibroblast growth factor binding	GO:0017134	F	0.0176	0.0748	THBS1|14.4261563852	1	19	16	295	http://www.ebi.ac.uk/QuickGO/GTerm?id=GO:0017134
4	4	fibronectin binding	GO:0001968	F	0.0185	0.0748	THBS1|14.4261563852	1	20	16	295	http://www.ebi.ac.uk/QuickGO/GTerm?id=GO:0001968
4	4	lipopolysaccharide binding	GO:0001530	F	0.0194	0.0748	BPIFA2|0.277269049644	1	21	16	295	http://www.ebi.ac.uk/QuickGO/GTerm?id=GO:0001530
5	5	lipoprotein particle binding	GO:0071813	F	0.0203	0.0748	THBS1|14.4261563852	1	22	16	295	http://www.ebi.ac.uk/QuickGO/GTerm?id=GO:0071813
4	4	protein-lipid complex binding	GO:0071814	F	0.0203	0.0748	THBS1|14.4261563852	1	22	16	295	http://www.ebi.ac.uk/QuickGO/GTerm?id=GO:0071814
5	5	peptidase activity, acting on L-amino acid peptides	GO:0070011	F	0.0215	0.0748	PEPD|1.52873541741;CAPNS1|20.0;HGFAC|20.0	3	657	16	295	http://www.ebi.ac.uk/QuickGO/GTerm?id=GO:0070011
4	4	laminin binding	GO:0043236	F	0.0221	0.0748	THBS1|14.4261563852	1	24	16	295	http://www.ebi.ac.uk/QuickGO/GTerm?id=GO:0043236
4	4	peptidase activity	GO:0008233	F	0.0225	0.0748	PEPD|1.52873541741;CAPNS1|20.0;HGFAC|20.0	3	669	16	295	http://www.ebi.ac.uk/QuickGO/GTerm?id=GO:0008233
6	4,5,6	phosphatidylserine binding	GO:0001786	F	0.0249	0.0792	THBS1|14.4261563852	1	27	16	295	http://www.ebi.ac.uk/QuickGO/GTerm?id=GO:0001786
8	8	calcium-dependent cysteine-type endopeptidase activity	GO:0004198	F	0.0258	0.0792	CAPNS1|20.0	1	28	16	295	http://www.ebi.ac.uk/QuickGO/GTerm?id=GO:0004198
3	3	macromolecular complex binding	GO:0044877	F	0.0273	0.0809	LCP1|1.74267242192;THBS1|14.4261563852;TAGLN2|20.0;KRT14|0.05	4	1283	16	295	http://www.ebi.ac.uk/QuickGO/GTerm?id=GO:0044877
7	7	manganese ion binding	GO:0030145	F	0.0348	0.0973	PEPD|1.52873541741	1	38	16	295	http://www.ebi.ac.uk/QuickGO/GTerm?id=GO:0030145
4	4	enzyme inhibitor activity	GO:0004857	F	0.0362	0.0973	SERPINA7|2.25313591472;SERPINB10|20.0	2	326	16	295	http://www.ebi.ac.uk/QuickGO/GTerm?id=GO:0004857
7	7	aminopeptidase activity	GO:0004177	F	0.0366	0.0973	PEPD|1.52873541741	1	40	16	295	http://www.ebi.ac.uk/QuickGO/GTerm?id=GO:0004177
7	6,7	chemokine activity	GO:0008009	F	0.0375	0.0973	LOC100630489|2.91652313698	1	41	16	295	http://www.ebi.ac.uk/QuickGO/GTerm?id=GO:0008009
3	3	extracellular matrix binding	GO:0050840	F	0.042	0.105	THBS1|14.4261563852	1	46	16	295	http://www.ebi.ac.uk/QuickGO/GTerm?id=GO:0050840
6	6	chemokine receptor binding	GO:0042379	F	0.0438	0.105	LOC100630489|2.91652313698	1	48	16	295	http://www.ebi.ac.uk/QuickGO/GTerm?id=GO:0042379
4	4	cell adhesion molecule binding	GO:0050839	F	0.0442	0.105	THBS1|14.4261563852;TAGLN2|20.0	2	364	16	295	http://www.ebi.ac.uk/QuickGO/GTerm?id=GO:0050839
3	3	modified amino acid binding	GO:0072341	F	0.0465	0.107	THBS1|14.4261563852	1	51	16	295	http://www.ebi.ac.uk/QuickGO/GTerm?id=GO:0072341
2.Detailed information of KEGG pathway-based enrichment of the differentially expressed proteins
Pathway Name	Pathway ID	Pvalue	Pvalue_adjusted	Genes	Count	Pop Hit	List_Total	Background Genes	URL	Class
Bladder cancer	ecb05219	0.0172	0.0772	THBS1|14.4261563852	1	42	3	295	http://www.kegg.jp/kegg-bin/show_pathway?ecb05219/ecb:100057478%09red	Human Diseases
Ovarian steroidogenesis	ecb04913	0.0181	0.0772	LHB|20.0	1	44	3	295	http://www.kegg.jp/kegg-bin/show_pathway?ecb04913/ecb:100054774%09red	Organismal Systems
Malaria	ecb05144	0.0193	0.0772	THBS1|14.4261563852	1	47	3	295	http://www.kegg.jp/kegg-bin/show_pathway?ecb05144/ecb:100057478%09red	Human Diseases
p53 signaling pathway	ecb04115	0.027	0.0772	THBS1|14.4261563852	1	66	3	295	http://www.kegg.jp/kegg-bin/show_pathway?ecb04115/ecb:100057478%09red	Cellular Processes
Prolactin signaling pathway	ecb04917	0.0286	0.0772	LHB|20.0	1	70	3	295	http://www.kegg.jp/kegg-bin/show_pathway?ecb04917/ecb:100054774%09red	Organismal Systems
TGF-beta signaling pathway	ecb04350	0.0335	0.0772	THBS1|14.4261563852	1	82	3	295	http://www.kegg.jp/kegg-bin/show_pathway?ecb04350/ecb:100057478%09red	Environmental Information Processing
ECM-receptor interaction	ecb04512	0.0339	0.0772	THBS1|14.4261563852	1	83	3	295	http://www.kegg.jp/kegg-bin/show_pathway?ecb04512/ecb:100057478%09red	Environmental Information Processing
GnRH signaling pathway	ecb04912	0.0363	0.0772	LHB|20.0	1	89	3	295	http://www.kegg.jp/kegg-bin/show_pathway?ecb04912/ecb:100054774%09red	Organismal Systems
